# Supplementary material for: The involvement of the primo vascular system in local enteritis and its modification by electroacupuncture
Source: Frontiers journal article supplement (doi:10.3389/fimmu.2022.1072996), 2023-01-11
Supplement: Data_Sheet_1.xls [file Data_Sheet_1.xls]

## Sheet: Sheet1
Accession	Control1_intensity	Control2_intensity	Control3_intensity	TNBS1_intensity	TNBS2_intensity	TNBS3_intensity	Description	Ratio.TNBS_Control	Ratio_base2.TNBS_Control	pValue.TNBS_Control
G1SEX0	3079.4	649.8	2247.1	3496.4	2783.7	814.8	Very-long-chain (3R)-3-hydroxyacyl-CoA dehydratase OS=Oryctolagus cuniculus OX=9986 GN=HACD2 PE=3 SV=1	1.18717	0.24753	0.745723
G1SUV6	962.1	246.1	1832.1	1430.9	1213	807.6	Neuronal growth regulator 1 OS=Oryctolagus cuniculus OX=9986 GN=NEGR1 PE=4 SV=1	1.13525	0.18301	0.795008
G1STT3	34543.4	9999	12090.4	14466.6	25605.2	11488.9	Uncharacterized protein OS=Oryctolagus cuniculus OX=9986 GN=SERPINB10 PE=3 SV=1	0.910439	-0.135366	0.859427
Q95218	12790.5	3942.8	6616.1	4465.3	18056.4	3773.7	Deleted in malignant brain tumors 1 protein OS=Oryctolagus cuniculus OX=9986 GN=Dmbt1 PE=1 SV=2	1.12617	0.171425	0.862971
G1SXM9	8939.6	3077.1	3984.5	7270.3	3373.9	2916.2	Lymphatic vessel endothelial hyaluronan receptor 1 OS=Oryctolagus cuniculus OX=9986 GN=LYVE1 PE=4 SV=1	0.847461	-0.238781	0.739929
G1SK63	1837.7	653.6	702	615.6	885.2	760.7	Uncharacterized protein OS=Oryctolagus cuniculus OX=9986 PE=4 SV=2	0.708202	-0.497767	0.47528
G1SU09	1622	595.5	543.6	1669.9	1086.9	1353.3	Uncharacterized protein OS=Oryctolagus cuniculus OX=9986 GN=MILR1 PE=4 SV=2	1.48857	0.57393	0.312557
G1TQG4	5001.6	2003.6	2622.8	1890.9	2465	1326.8	Uncharacterized protein OS=Oryctolagus cuniculus OX=9986 GN=LOC100350339 PE=4 SV=1	0.590226	-0.760661	0.247096
G1SLH0	848.5	353.8	367.3	353.8	655.5	349.8	LIM domain containing 2 OS=Oryctolagus cuniculus OX=9986 GN=LIMD2 PE=4 SV=1	0.865889	-0.207746	0.732784
G1TH72	260.5	113.4	139	118.2	211.8	147	Fructose-1,6-bisphosphatase 1 OS=Oryctolagus cuniculus OX=9986 GN=FBP1 PE=3 SV=1	0.930006	-0.104688	0.832893
G1TEP7	266.8	116.5	133.3	122.8	223.8	173	Cas scaffold protein family member 4 OS=Oryctolagus cuniculus OX=9986 GN=CASS4 PE=4 SV=2	1.00581	0.0083535	0.986554
Q8WN94	2021.1	913.3	990.6	928	1134.6	562.4	Acyl-CoA-binding protein OS=Oryctolagus cuniculus OX=9986 GN=DBI PE=3 SV=3	0.66879	-0.580375	0.333503
G1T8C0	265.2	120.1	145.6	155.3	146.6	160.9	Regulator of cell cycle OS=Oryctolagus cuniculus OX=9986 GN=RGCC PE=4 SV=2	0.871727	-0.198052	0.639889
G1SVY8	25744	11735.6	14028.5	10547.7	18003.6	10534.2	Creatine kinase B-type OS=Oryctolagus cuniculus OX=9986 GN=CKB PE=3 SV=2	0.758822	-0.398167	0.454184
F8T9Y2	3867.2	1820.8	1859.9	2127.7	2551.6	1448.5	C-type lectin 1 member B OS=Oryctolagus cuniculus OX=9986 GN=clec1b PE=2 SV=1	0.811855	-0.300706	0.561307
G1SNW3	192	91.7	142.8	143.6	170.7	110.8	Uncharacterized protein OS=Oryctolagus cuniculus OX=9986 GN=CD1C PE=4 SV=1	0.996717	-0.00474416	0.989627
G1SW65	429.7	207.5	267.1	1372.3	1460.9	256.4	ATP synthase membrane subunit c locus 2 OS=Oryctolagus cuniculus OX=9986 GN=ATP5MC2 PE=3 SV=1	3.41656	1.77255	0.137597
G1TIX2	1049.1	506.8	655.3	634	502.5	1295.6	60S ribosomal protein L29 OS=Oryctolagus cuniculus OX=9986 GN=LOC100353270 PE=3 SV=1	1.0999	0.137374	0.814539
G1T6M6	966.5	471.1	943.4	736.6	556	485.2	Limbic system associated membrane protein OS=Oryctolagus cuniculus OX=9986 GN=LSAMP PE=4 SV=1	0.746661	-0.421475	0.32163
G1TZS1	3901	1916.7	2346.2	2229.8	4357.2	1600.5	Myosin light chain kinase, smooth muscle OS=Oryctolagus cuniculus OX=9986 GN=MYLK PE=4 SV=2	1.00289	0.00416481	0.994267
B7NZG7	976.6	485.1	723.3	635.3	693.8	716	Sorting nexin 3 (Predicted) OS=Oryctolagus cuniculus OX=9986 GN=SNX3 PE=4 SV=1	0.935973	-0.0954612	0.762176
U3KML5	426.4	212.7	295.5	328.4	439.8	694.2	B cell scaffold protein with ankyrin repeats 1 OS=Oryctolagus cuniculus OX=9986 GN=BANK1 PE=4 SV=1	1.56473	0.645917	0.231595
G1TLI2	962.2	484.6	801.1	902.8	696.8	235.5	Uncharacterized protein OS=Oryctolagus cuniculus OX=9986 GN=LOC100345882 PE=3 SV=1	0.816362	-0.292719	0.600133
G1TLU5	402.9	204.3	229.2	172.1	208.2	240	Small ubiquitin-related modifier OS=Oryctolagus cuniculus OX=9986 GN=LOC100345604 PE=3 SV=1	0.741631	-0.431227	0.333
G1T0U2	4164	2116.3	2102.1	2230.7	3600.6	1478.6	Synaptotagmin like 4 OS=Oryctolagus cuniculus OX=9986 GN=SYTL4 PE=4 SV=2	0.872053	-0.197512	0.718718
G1SMU4	1080.4	549.2	656.2	640.5	625.8	492.9	Suv3 like RNA helicase OS=Oryctolagus cuniculus OX=9986 GN=SUPV3L1 PE=4 SV=1	0.769621	-0.37778	0.357262
G1U3D6	1371.2	709	676.7	772.3	1131.8	601.4	P2X purinoceptor OS=Oryctolagus cuniculus OX=9986 GN=P2RX1 PE=3 SV=1	0.908811	-0.137948	0.775803
G1TM33	1084.1	562.7	657.4	540	646.7	210.2	GON7, KEOPS complex subunit OS=Oryctolagus cuniculus OX=9986 GN=GON7 PE=4 SV=1	0.606241	-0.722037	0.218365
G1TBQ3	8689.7	4524	4171.1	4943	6918.6	3586	Uncharacterized protein OS=Oryctolagus cuniculus OX=9986 GN=SELP PE=4 SV=2	0.888569	-0.170444	0.729957
G1TR45	7774.5	4061.9	4387.6	3548.7	4988	2227.7	Uncharacterized protein OS=Oryctolagus cuniculus OX=9986 PE=4 SV=2	0.663486	-0.591862	0.272025
G1T823	11149.6	5864.1	6009.7	5304.8	7598.5	4826.4	Coactosin like F-actin binding protein 1 OS=Oryctolagus cuniculus OX=9986 GN=COTL1 PE=4 SV=2	0.770073	-0.376933	0.413887
G1TI27	10296.7	5422.7	5295.2	5774.2	7792.1	7881.2	Uncharacterized protein OS=Oryctolagus cuniculus OX=9986 GN=LOC100125981 PE=3 SV=1	1.0206	0.0294175	0.939428
G1TIB4	378.4	199.6	355.4	347.6	318.3	199	Uncharacterized protein OS=Oryctolagus cuniculus OX=9986 PE=1 SV=1	0.926612	-0.109963	0.767763
G1SQC7	4038.6	2144.9	2482.2	2530	4065.4	2986	Pleckstrin OS=Oryctolagus cuniculus OX=9986 GN=PLEK PE=4 SV=2	1.10567	0.14492	0.701081
G1TSS7	34172.5	18224.5	17632.6	20665.7	29236.6	21665.7	Integrin beta OS=Oryctolagus cuniculus OX=9986 GN=ITGB3 PE=3 SV=1	1.02197	0.03135	0.936582
U3KP46	5041.7	2710	2448.8	2429	3875.6	3303.1	Tubulin beta 1 class VI OS=Oryctolagus cuniculus OX=9986 GN=TUBB1 PE=3 SV=1	0.941885	-0.0863772	0.841347
G1SX67	4440.6	2410.9	2806.8	2824.2	3695.3	2107	Phosphodiesterase OS=Oryctolagus cuniculus OX=9986 GN=PDE5A PE=3 SV=1	0.89317	-0.162993	0.679192
G1SQA1	1780.7	976.1	2276.5	1139.4	1152.9	642.6	Carboxymethylenebutenolidase homolog OS=Oryctolagus cuniculus OX=9986 GN=CMBL PE=4 SV=1	0.583097	-0.778192	0.166732
G1U3M3	850.6	466.5	481.7	422.5	631.4	348.1	Tubulin-specific chaperone A OS=Oryctolagus cuniculus OX=9986 PE=3 SV=1	0.779408	-0.359549	0.431989
G1TAN5	672.8	369.4	429.4	448.6	602.7	354.7	Diacylglycerol kinase OS=Oryctolagus cuniculus OX=9986 GN=DGKH PE=3 SV=2	0.955423	-0.0657885	0.861547
G1SG72	8603.9	4728	5586.4	4799.9	6276	3492.2	ATP binding cassette subfamily E member 1 OS=Oryctolagus cuniculus OX=9986 GN=ABCE1 PE=1 SV=1	0.770053	-0.37697	0.366133
G1TDT2	693.5	381.5	424.6	486.7	566.1	378.4	Uncharacterized protein OS=Oryctolagus cuniculus OX=9986 GN=LSM6 PE=4 SV=2	0.954388	-0.0673522	0.848289
G1TMV4	393.8	217.1	257.1	294.9	282.6	146	SR-related CTD associated factor 4 OS=Oryctolagus cuniculus OX=9986 GN=SCAF4 PE=4 SV=2	0.833525	-0.262703	0.538436
G1SER2	5597.2	3088.3	3414.4	3694	5093.4	3363.3	Glycoprotein Ib platelet subunit alpha OS=Oryctolagus cuniculus OX=9986 GN=GP1BA PE=4 SV=1	1.0042	0.00604376	0.986625
G1SY59	1736.3	967.2	1246.8	1401.7	1284.9	1129.5	Sodium/hydrogen exchanger OS=Oryctolagus cuniculus OX=9986 GN=SLC9A9 PE=3 SV=1	0.966028	-0.0498631	0.860169
G1U5V3	2200.7	1228.3	899.2	3119.6	1380.5	1357.5	Uncharacterized protein OS=Oryctolagus cuniculus OX=9986 PE=4 SV=1	1.35336	0.436542	0.50809
G1TJM7	1214.3	683.7	737.5	805.1	1270.9	1170.2	Glycoprotein IX platelet OS=Oryctolagus cuniculus OX=9986 GN=GP9 PE=4 SV=1	1.23172	0.300676	0.407418
G1T6X7	1150.4	650.7	1256.2	1105.1	1010.7	666.8	Carboxylic ester hydrolase OS=Oryctolagus cuniculus OX=9986 PE=3 SV=1	0.910149	-0.135825	0.710109
U3KMX6	9569.5	5416.2	6239.5	6103.7	7166.2	5685.2	Transcription factor BTF3 OS=Oryctolagus cuniculus OX=9986 GN=BTF3 PE=3 SV=1	0.893047	-0.163192	0.603482
G1TAB2	2277.1	1294	1520.4	1644.6	1984.3	3216.5	Uncharacterized protein OS=Oryctolagus cuniculus OX=9986 GN=GM2A PE=4 SV=1	1.34448	0.427044	0.357324
G1TKE3	13254.5	7542.8	8113.9	7074.2	8388.6	6191.9	Transgelin OS=Oryctolagus cuniculus OX=9986 GN=TAGLN2 PE=3 SV=1	0.749007	-0.416949	0.277315
G1TJP8	1992.6	1134.6	1397.6	1570.6	1647.8	1053	Nuclear casein kinase and cyclin dependent kinase substrate 1 OS=Oryctolagus cuniculus OX=9986 GN=NUCKS1 PE=4 SV=1	0.943998	-0.0831443	0.801898
G1SSP5	2071.6	1180.9	936.7	1118	1413.4	704.1	Triggering receptor expressed on myeloid cells like 1 OS=Oryctolagus cuniculus OX=9986 GN=TREML1 PE=4 SV=2	0.772343	-0.372686	0.472868
G1TQW5	2998.8	1711.3	1858	1887.1	2484	2058.7	RAS guanyl releasing protein 2 OS=Oryctolagus cuniculus OX=9986 GN=RASGRP2 PE=4 SV=1	0.978944	-0.0307018	0.922289
G1TUI9	853.8	487.3	473.3	625.5	571.8	257.9	Uncharacterized protein OS=Oryctolagus cuniculus OX=9986 PE=4 SV=2	0.802028	-0.318275	0.518422
G1T2I3	281.4	160.9	221.6	152.4	176.2	109.1	Calcium/calmodulin dependent protein kinase kinase 1 OS=Oryctolagus cuniculus OX=9986 GN=CAMKK1 PE=4 SV=1	0.659286	-0.601024	0.132135
G1TTM0	2157.7	1236.3	1159.7	940.2	1287.7	861.6	Stathmin OS=Oryctolagus cuniculus OX=9986 GN=STMN2 PE=3 SV=2	0.678459	-0.559666	0.231584
G1SQ46	10214.8	5898.7	6677.6	4286.9	6214.8	2418.7	Rho GDP dissociation inhibitor beta OS=Oryctolagus cuniculus OX=9986 GN=ARHGDIB PE=4 SV=1	0.566906	-0.818819	0.128613
G1SZ25	1192	689.5	954.7	720.1	967.5	690.4	Uncharacterized protein OS=Oryctolagus cuniculus OX=9986 GN=LOC100351756 PE=4 SV=1	0.838446	-0.25421	0.418855
G1SJE1	12834.2	7455.3	7300.5	8186.9	11482.1	8860.1	Uncharacterized protein OS=Oryctolagus cuniculus OX=9986 GN=ITGA2B PE=3 SV=1	1.03404	0.0482892	0.887578
P34032	5306.1	3083.3	3000	2599	4020.3	2080.5	Thymosin beta-4 OS=Oryctolagus cuniculus OX=9986 GN=TMSB4 PE=1 SV=2	0.763851	-0.388637	0.399703
G1SWG3	5407.2	3147.8	3945.5	2990.4	4088.1	2120.4	Histamine N-methyltransferase OS=Oryctolagus cuniculus OX=9986 GN=HNMT PE=4 SV=1	0.735883	-0.442452	0.275861
G1TAC4	1354.1	791.3	872.1	985	1146.2	673.4	Glutaredoxin-1 OS=Oryctolagus cuniculus OX=9986 GN=GLRX PE=4 SV=1	0.929445	-0.105559	0.767112
G1SPD1	1136.1	664.4	710.6	612	879.6	670.2	Uncharacterized protein OS=Oryctolagus cuniculus OX=9986 GN=MTPN PE=4 SV=1	0.860898	-0.216086	0.532645
G1SX70	461.3	270	470.4	714.6	497.7	634.6	RAB6B, member RAS oncogene family OS=Oryctolagus cuniculus OX=9986 GN=RAB6B PE=4 SV=1	1.53691	0.620029	0.077357
G1TRH5	21399.5	12543.6	12920.3	15624	18256	15448.1	Coronin OS=Oryctolagus cuniculus OX=9986 GN=CORO1C PE=3 SV=1	1.05259	0.0739477	0.799728
G1U8G0	5423.4	3180	3242.1	7614	5067	3877.4	Interferon-gamma-inducible GTPase IFGGD1 protein OS=Oryctolagus cuniculus OX=9986 GN=IFGGD1 PE=4 SV=2	1.39786	0.483224	0.30177
G1TE13	5813	3410.6	5140.6	4557.2	4661.7	3614.9	Ras homolog family member G OS=Oryctolagus cuniculus OX=9986 GN=RHOG PE=4 SV=1	0.893457	-0.16253	0.553245
G1U6L9	1170.2	687	746.7	807	855	896.1	Matrix metalloproteinase-9 OS=Oryctolagus cuniculus OX=9986 GN=MMP9 PE=3 SV=1	0.982411	-0.0256014	0.925926
G1SZ47	2965.8	1745.5	2115.4	2159.4	1964.2	1837.3	Uncharacterized protein OS=Oryctolagus cuniculus OX=9986 GN=RPS23 PE=1 SV=1	0.873174	-0.195659	0.482504
G1TG13	2274.3	1340.9	1643	1574.8	2084.3	1162.3	Uncharacterized protein OS=Oryctolagus cuniculus OX=9986 PE=4 SV=1	0.91693	-0.125116	0.723176
G1SRG7	237.9	140.6	195.9	197.7	163.6	249.4	Molybdenum cofactor synthesis 1 OS=Oryctolagus cuniculus OX=9986 GN=MOCS1 PE=3 SV=1	1.0632	0.0884076	0.763887
G1SW63	1255.9	743.7	787.1	849.2	761.5	1072.8	Uncharacterized protein OS=Oryctolagus cuniculus OX=9986 PE=4 SV=1	0.962967	-0.0544417	0.863969
G1TT06	20807	12330.2	11725	11905.4	17704	12001.1	Selenium binding protein 1 OS=Oryctolagus cuniculus OX=9986 GN=SELENBP1 PE=4 SV=1	0.927518	-0.108553	0.772442
G1SRA9	10729.4	6390.7	8258.8	7092.2	9633.7	7800.5	Integrin linked kinase OS=Oryctolagus cuniculus OX=9986 GN=ILK PE=4 SV=1	0.966409	-0.0492942	0.855849
G1SV63	2429.1	1458	1887.8	2118.4	1908.2	1325.3	Uncharacterized protein OS=Oryctolagus cuniculus OX=9986 GN=SRRM1 PE=4 SV=1	0.926752	-0.109745	0.720889
G1SLX6	5044.1	3029.2	2805.1	2754.3	3773.4	1751	PYD and CARD domain containing OS=Oryctolagus cuniculus OX=9986 GN=PYCARD PE=4 SV=1	0.761022	-0.39399	0.399892
G1T3S2	187.5	112.9	123.7	184.6	76.1	104.8	EPH receptor B3 OS=Oryctolagus cuniculus OX=9986 GN=EPHB3 PE=3 SV=2	0.861825	-0.214533	0.650413
G1TG27	1113.1	671.1	710	531.7	649.5	454.9	Ribulose-phosphate 3-epimerase OS=Oryctolagus cuniculus OX=9986 GN=RPE PE=3 SV=1	0.655962	-0.608316	0.1334
G1U1X6	9593.4	5793.8	7161.3	6925.6	8674.8	4871.8	5'-nucleotidase OS=Oryctolagus cuniculus OX=9986 GN=NT5C3A PE=3 SV=1	0.907918	-0.139366	0.680765
G1TAE2	2208.8	1335.5	1567.3	2209.4	1904.4	1044.6	ELAV-like protein OS=Oryctolagus cuniculus OX=9986 GN=ELAVL1 PE=3 SV=2	1.00916	0.0131492	0.973154
G1TXB6	8491.6	5167.3	5586.2	4923.6	7947.7	5413.7	Cofilin 1 OS=Oryctolagus cuniculus OX=9986 GN=CFL1 PE=3 SV=1	0.950112	-0.0738305	0.83085
G1TNL3	5647.4	3441.9	8722	3957.3	4357.5	2397.8	Dimethylaniline monooxygenase [N-oxide-forming] OS=Oryctolagus cuniculus OX=9986 GN=FMO1 PE=3 SV=1	0.60145	-0.733483	0.223391
G1T8C8	1455.4	888	1092.2	1035.9	1158.3	717.8	Sorting nexin 12 OS=Oryctolagus cuniculus OX=9986 GN=SNX12 PE=4 SV=2	0.847596	-0.238551	0.455771
G1SLX0	989.5	604.3	644.8	569.3	804.7	480.4	Glia maturation factor beta OS=Oryctolagus cuniculus OX=9986 GN=GMFB PE=4 SV=2	0.828375	-0.271644	0.457443
G1SS79	5365	3283.7	3729	4197.9	5507.5	4535.4	Myristoylated alanine rich protein kinase C substrate OS=Oryctolagus cuniculus OX=9986 GN=MARCKS PE=4 SV=1	1.15052	0.202287	0.451182
G1TR82	5063.6	3104.5	2828.8	2727.2	3698.1	3900.7	Tubulin alpha chain OS=Oryctolagus cuniculus OX=9986 GN=TUBA4A PE=3 SV=1	0.938992	-0.0908152	0.791479
G1TE88	326.6	200.3	236.4	272.6	827.9	334.5	Plastin 1 OS=Oryctolagus cuniculus OX=9986 GN=PLS1 PE=4 SV=2	1.88	0.910729	0.280687
P62139	1500.1	920.2	1074.7	1006.9	1154.8	551.6	Serine/threonine-protein phosphatase PP1-alpha catalytic subunit OS=Oryctolagus cuniculus OX=9986 GN=PPP1CA PE=1 SV=1	0.776338	-0.365243	0.357871
G1SK44	1225	755.5	859.6	822.8	985.9	645	Transporter OS=Oryctolagus cuniculus OX=9986 GN=SLC6A4 PE=3 SV=2	0.863948	-0.210984	0.498113
G1SV55	199.1	123.5	117.9	145.2	193.6	162.9	Receptor expression-enhancing protein OS=Oryctolagus cuniculus OX=9986 GN=REEP2 PE=3 SV=2	1.13893	0.187683	0.530661
G1T483	243.3	151.7	182.9	227.5	229.7	198.2	Intercellular adhesion molecule 2 OS=Oryctolagus cuniculus OX=9986 GN=ICAM2 PE=4 SV=1	1.13411	0.181555	0.419543
G1TGF1	9438.2	5886.7	6629.5	5801.3	7308.4	5354.8	Prostaglandin E synthase 3 OS=Oryctolagus cuniculus OX=9986 GN=PTGES3 PE=3 SV=1	0.841039	-0.249755	0.398671
G1SNK4	272.1	169.7	183.5	163.6	163	114	Cytochrome b561 family member D2 OS=Oryctolagus cuniculus OX=9986 GN=CYB561D2 PE=4 SV=1	0.704622	-0.505079	0.162821
G1TCW5	9070.4	5664	5961.8	5090.4	5658.9	4468.8	Peptidase D OS=Oryctolagus cuniculus OX=9986 GN=PEPD PE=3 SV=1	0.735309	-0.443577	0.185121
G1SDR2	1230.2	769.9	768.1	857.3	1769.7	736.9	Myosin light chain 9 OS=Oryctolagus cuniculus OX=9986 GN=MYL9 PE=4 SV=1	1.21519	0.281187	0.611065
C1IYH7	2139.5	1339.9	1272.4	1380.9	1558.5	1042.2	CD1d OS=Oryctolagus cuniculus OX=9986 GN=CD1D PE=2 SV=1	0.837914	-0.255126	0.463411
G1TDW9	8175.9	5130.3	5823.3	4944.4	5516	5054.3	Tyrosine-protein kinase OS=Oryctolagus cuniculus OX=9986 GN=SYK PE=3 SV=2	0.811035	-0.302164	0.268357
G1SXL3	545.7	343.2	413.7	434.9	256	255.2	Uncharacterized protein OS=Oryctolagus cuniculus OX=9986 GN=ST13 PE=4 SV=1	0.726317	-0.461329	0.231116
G1T5F0	1203.7	759.9	945.3	1028.3	1145.5	621.2	Recombination signal binding protein for immunoglobulin kappa J region OS=Oryctolagus cuniculus OX=9986 GN=RBPJ PE=4 SV=2	0.960844	-0.0576259	0.861721
G1TCW6	223	140.9	170.5	155.5	218.8	305.7	Family with sequence similarity 118 member B OS=Oryctolagus cuniculus OX=9986 GN=FAM118B PE=4 SV=1	1.27245	0.347615	0.384241
G1SLU3	6553.5	4151.6	5033.7	4403.3	6144.4	4450.4	LIM and senescent cell antigen-like-containing domain protein OS=Oryctolagus cuniculus OX=9986 GN=LIMS1 PE=4 SV=1	0.952938	-0.0695457	0.798617
G1TBY3	271.2	171.9	248.8	227	209.2	166.1	Cyclin dependent kinase 13 OS=Oryctolagus cuniculus OX=9986 GN=CDK13 PE=4 SV=1	0.870502	-0.20008	0.442601
G1TET2	28594.5	18139.9	21663.3	16190.5	26964.4	22082.4	Lymphocyte cytosolic protein 1 OS=Oryctolagus cuniculus OX=9986 GN=LCP1 PE=4 SV=1	0.953794	-0.0682504	0.821516
G1SI89	2824.1	1792.2	2109.6	2477.8	1921.8	2110.4	Uncharacterized protein OS=Oryctolagus cuniculus OX=9986 GN=CHTOP PE=4 SV=1	0.9679	-0.0470701	0.845424
G1SUW1	11136.9	7070.8	7355.9	6775.8	10156.7	5155.9	Bridging integrator 2 OS=Oryctolagus cuniculus OX=9986 GN=BIN2 PE=4 SV=2	0.864057	-0.210802	0.588414
Q95223	5004.6	3181.7	3663.3	3055.4	4288.6	1980.1	Beta-arrestin-1 OS=Oryctolagus cuniculus OX=9986 GN=ARRB1 PE=2 SV=1	0.78687	-0.345803	0.383829
G1SK32	141.8	90.2	127.2	118.7	112.7	49	Replication factor C subunit 3 OS=Oryctolagus cuniculus OX=9986 GN=RFC3 PE=4 SV=2	0.780624	-0.3573	0.386935
G1TAF9	114.7	73	94.8	96.7	103.3	117.1	Bromodomain PHD finger transcription factor OS=Oryctolagus cuniculus OX=9986 GN=BPTF PE=4 SV=1	1.12248	0.166687	0.439772
G1SNS1	940.4	598.7	786.3	775.8	702.2	537.3	BMS1, ribosome biogenesis factor OS=Oryctolagus cuniculus OX=9986 GN=BMS1 PE=4 SV=1	0.866647	-0.206484	0.442416
G1T641	849.9	541.1	548.8	491.2	527.1	237.2	Acyl-CoA thioesterase 13 OS=Oryctolagus cuniculus OX=9986 GN=ACOT13 PE=4 SV=1	0.647232	-0.627645	0.1703
G1SX37	983.2	626	672.2	570.8	942.8	251.7	Cofilin 2 OS=Oryctolagus cuniculus OX=9986 GN=CFL2 PE=3 SV=1	0.773779	-0.370007	0.494364
G1T182	2974.8	1894.2	1915.8	2124.2	2055.3	1611.4	Metadherin OS=Oryctolagus cuniculus OX=9986 GN=MTDH PE=4 SV=1	0.853511	-0.228518	0.444735
G1TBT8	1902.4	1213.5	1144.7	1325.6	1934.1	2358.1	Glycoprotein V platelet OS=Oryctolagus cuniculus OX=9986 GN=GP5 PE=4 SV=1	1.31855	0.398949	0.305258
G1T983	3353.7	2140	2833	2413	2710	1573.3	Heme binding protein 1 OS=Oryctolagus cuniculus OX=9986 GN=HEBP1 PE=4 SV=2	0.804196	-0.314381	0.32898
G1SZA8	644.7	411.5	515.4	579.1	573.6	404.2	B-TFIID TATA-box binding protein associated factor 1 OS=Oryctolagus cuniculus OX=9986 GN=BTAF1 PE=4 SV=2	0.990646	-0.0135585	0.958535
G1T8A2	935	597.4	621.4	715.4	608.7	864.1	40S ribosomal protein S30 OS=Oryctolagus cuniculus OX=9986 GN=FAU PE=1 SV=1	1.01597	0.0228606	0.934742
G1TP25	1337.6	855	979.2	873.6	795.9	579.5	Ubiquitin associated protein 2 like OS=Oryctolagus cuniculus OX=9986 GN=UBAP2L PE=4 SV=1	0.709061	-0.496018	0.143457
G1TPC5	1737.4	1110.6	1374.8	1157.2	1345.8	899.7	Tumor protein D52 OS=Oryctolagus cuniculus OX=9986 GN=TPD52 PE=4 SV=1	0.805792	-0.311521	0.287468
G1T3W5	918.1	588.6	560.7	501.2	664.1	644.4	FYN binding protein 1 OS=Oryctolagus cuniculus OX=9986 GN=FYB1 PE=4 SV=1	0.875351	-0.192066	0.531974
G1SKJ0	396.8	255.3	353.2	236.1	368.8	117.7	Glutamate ionotropic receptor kainate type subunit 2 OS=Oryctolagus cuniculus OX=9986 GN=GRIK2 PE=3 SV=1	0.71879	-0.476358	0.323349
G1SN76	31511.8	20322	22469.6	22796.1	25741.4	19124	Serine/threonine kinase 10 OS=Oryctolagus cuniculus OX=9986 GN=STK10 PE=4 SV=1	0.910611	-0.135093	0.60298
G1T3D4	387.8	250.2	426	539.3	474.7	258.3	Tetraspanin 31 OS=Oryctolagus cuniculus OX=9986 GN=TSPAN31 PE=3 SV=1	1.19577	0.257941	0.527058
G1U8S0	1580.2	1020.2	1313.6	1458.2	1389.8	877.9	Uncharacterized protein OS=Oryctolagus cuniculus OX=9986 PE=4 SV=1	0.951942	-0.0710544	0.810103
G1SZ15	2968.7	1916.8	2546.5	2668.4	2836.3	1579	Mesencephalic astrocyte derived neurotrophic factor OS=Oryctolagus cuniculus OX=9986 GN=MANF PE=4 SV=1	0.953135	-0.0692475	0.827348
G1ST68	5086.4	3290.2	3984.5	3846.9	4034.7	6626.8	Uncharacterized protein OS=Oryctolagus cuniculus OX=9986 PE=3 SV=1	1.17371	0.231081	0.528495
G1TF67	30528.7	19771.6	21241.7	20253.3	29565.5	22525.7	Coronin OS=Oryctolagus cuniculus OX=9986 GN=CORO1A PE=3 SV=1	1.01122	0.0160926	0.954247
G1SM76	1191.6	772.1	1046.7	1072.8	1253.5	544.4	Zinc finger Ran-binding domain-containing protein 2 OS=Oryctolagus cuniculus OX=9986 GN=ZRANB2 PE=3 SV=1	0.953594	-0.0685529	0.858936
G1SVM0	98.4	63.9	75.7	88.2	78.4	59.6	SRSF protein kinase 1 OS=Oryctolagus cuniculus OX=9986 GN=SRPK1 PE=4 SV=2	0.95042	-0.0733629	0.779738
G1THY4	192.5	125	159.7	177.8	189.8	172.7	Purinergic receptor P2Y12 OS=Oryctolagus cuniculus OX=9986 GN=P2RY12 PE=4 SV=1	1.13223	0.179167	0.355203
G1T8C1	374.5	243.2	309.7	237	381.8	81.9	Uridine phosphorylase OS=Oryctolagus cuniculus OX=9986 GN=UPP1 PE=3 SV=2	0.755553	-0.404395	0.468812
G1TJ36	1724	1120.7	1349	1397.8	1444.3	1170.3	Uncharacterized protein OS=Oryctolagus cuniculus OX=9986 PE=4 SV=1	0.956768	-0.063759	0.772302
G1SKJ8	5506.6	3584.1	4050.3	3759.8	3665.1	3537.6	Treacle ribosome biogenesis factor 1 OS=Oryctolagus cuniculus OX=9986 GN=TCOF1 PE=4 SV=2	0.834221	-0.261498	0.280589
G1T0H8	9882.1	6433.5	8243.7	8375.4	8828.6	5785.7	ATP-dependent 6-phosphofructokinase OS=Oryctolagus cuniculus OX=9986 GN=PFKP PE=3 SV=1	0.936089	-0.0952824	0.722888
G1SWH6	1540.1	1003	1270.3	1862.8	2284.9	1853.4	Choline dehydrogenase OS=Oryctolagus cuniculus OX=9986 GN=CHDH PE=3 SV=2	1.57369	0.65415	0.025696
G1TNG2	3759.5	2450.7	2961.5	3249.8	2527.9	2349	Plasminogen activator, urokinase receptor OS=Oryctolagus cuniculus OX=9986 GN=PLAUR PE=4 SV=1	0.886063	-0.174519	0.499715
G1T1R4	542.2	354.2	386.3	353.7	369.2	294.2	Glucocorticoid receptor OS=Oryctolagus cuniculus OX=9986 GN=NR3C1 PE=3 SV=2	0.792937	-0.334722	0.228946
G1SGR6	15504.4	10138.5	11132.3	10692.3	8680.3	15182	Uncharacterized protein OS=Oryctolagus cuniculus OX=9986 GN=RPL29 PE=1 SV=2	0.939617	-0.0898553	0.784542
G1T7Z0	24545.7	16077.1	17255.4	13784.8	19969.8	14362.9	6-phosphogluconate dehydrogenase, decarboxylating OS=Oryctolagus cuniculus OX=9986 GN=PGD PE=3 SV=2	0.831358	-0.266458	0.380269
G1SLM1	7135.2	4680	5489	4465.5	5355.8	3556.5	Calcyclin binding protein OS=Oryctolagus cuniculus OX=9986 GN=CACYBP PE=4 SV=1	0.773096	-0.371281	0.215246
G1SUK0	247.6	162.5	169.1	191.2	191.8	216.5	Uncharacterized protein OS=Oryctolagus cuniculus OX=9986 GN=SMNDC1 PE=4 SV=1	1.03505	0.0496977	0.824447
G1SYQ5	564.4	370.6	403.2	347.3	304	147.4	Coatomer subunit delta OS=Oryctolagus cuniculus OX=9986 PE=3 SV=1	0.596847	-0.744567	0.102689
G1U4E6	1942.2	1276.7	1640.6	1577	1986.7	1924.7	Uncharacterized protein OS=Oryctolagus cuniculus OX=9986 GN=LOC100358336 PE=3 SV=1	1.12942	0.175578	0.415107
G1T616	5072.6	3334.7	3853.6	4052.2	4444.8	2437	Phosphoglucomutase 2 OS=Oryctolagus cuniculus OX=9986 GN=PGM2 PE=4 SV=2	0.891778	-0.165243	0.610534
G1TRF0	1138.8	748.9	682.4	823.5	1014.9	870.9	Serglycin OS=Oryctolagus cuniculus OX=9986 GN=SRGN PE=4 SV=1	1.05416	0.0760952	0.777565
G1SHU3	5918.2	3892.1	3777.9	6352.7	6997.7	4779.7	STEAP4 metalloreductase OS=Oryctolagus cuniculus OX=9986 GN=STEAP4 PE=4 SV=1	1.33425	0.416032	0.189066
G1STF2	48793.1	32113	35455.1	37532.1	37031.2	29245.3	SAM and HD domain containing deoxynucleoside triphosphate triphosphohydrolase 1 OS=Oryctolagus cuniculus OX=9986 GN=SAMHD1 PE=4 SV=2	0.892124	-0.164684	0.507689
G1T567	15261.2	10052.4	12144.7	10758.8	13205.3	14589.1	Ras homolog family member A OS=Oryctolagus cuniculus OX=9986 GN=RHOA PE=4 SV=1	1.02923	0.0415654	0.855728
G1SKS7	20029.4	13198.8	18572.8	20549.4	17863.6	24829.5	CD163 molecule OS=Oryctolagus cuniculus OX=9986 GN=CD163 PE=4 SV=1	1.22087	0.287914	0.259239
G1SRQ2	1244.7	821.1	911	782.4	930.3	697.9	Ubiquitin carboxyl-terminal hydrolase OS=Oryctolagus cuniculus OX=9986 GN=UCHL3 PE=3 SV=1	0.809796	-0.30437	0.264785
G1TPG3	5341.2	3529.8	4497.8	4618.7	3172.3	4121.5	Uncharacterized protein OS=Oryctolagus cuniculus OX=9986 GN=LOC100356144 PE=1 SV=1	0.891067	-0.166394	0.511051
G1U1T8	2466.1	1630.4	1623.9	1459	2154.4	1170.1	Glia maturation factor gamma OS=Oryctolagus cuniculus OX=9986 GN=GMFG PE=4 SV=1	0.836218	-0.258049	0.483051
G1T8Z0	11328.9	7491	8036.2	7616.4	11436.9	6638.1	Peroxiredoxin 6 OS=Oryctolagus cuniculus OX=9986 GN=PRDX6 PE=4 SV=1	0.956632	-0.063964	0.847456
G1SHX1	3597.2	2378.8	2503.5	2257.7	3134.4	1750	Ubiquitin conjugating enzyme E2 L3 OS=Oryctolagus cuniculus OX=9986 GN=UBE2L3 PE=3 SV=1	0.842278	-0.247632	0.470357
G1T432	36191	23945.1	27848.7	24111.1	33254.2	32198.6	Adenylyl cyclase-associated protein OS=Oryctolagus cuniculus OX=9986 GN=CAP1 PE=3 SV=1	1.01795	0.0256624	0.91486
U3KP30	1366.2	905.2	1211.8	1134.8	1024.5	850.5	2'-5'-oligoadenylate synthetase like OS=Oryctolagus cuniculus OX=9986 GN=OASL PE=4 SV=1	0.86409	-0.210747	0.37648
G1SGX4	7669.5	5089.6	6887.4	6364.1	5168.5	8242.7	Ribosomal protein S16 OS=Oryctolagus cuniculus OX=9986 GN=RPS16 PE=1 SV=1	1.00656	0.00942744	0.972635
P12247	220	146.1	374	298.6	233.7	129.1	Complement C3 alpha chain (Fragment) OS=Oryctolagus cuniculus OX=9986 GN=C3 PE=2 SV=1	0.893663	-0.162197	0.76865
G1U5B1	15742.6	10460.9	10879	15240	11316.9	15009.3	Folate receptor beta OS=Oryctolagus cuniculus OX=9986 GN=FOLR2 PE=4 SV=1	1.12091	0.164672	0.519472
G1TFL3	5264.1	3498.3	3869	3039.3	3856.5	3048.7	GTP-binding nuclear protein Ran OS=Oryctolagus cuniculus OX=9986 PE=3 SV=1	0.787284	-0.345044	0.211
U3KNE2	4640.1	3086.8	4448.1	4727.5	4970.6	4940.4	Uncharacterized protein OS=Oryctolagus cuniculus OX=9986 GN=NDUFA4 PE=4 SV=1	1.20234	0.265846	0.17238
G1SPQ7	271.2	180.7	202.7	148.6	160	123.5	Uncharacterized protein OS=Oryctolagus cuniculus OX=9986 PE=4 SV=1	0.660098	-0.599248	0.064609
G1SUP9	296.1	197.5	263.2	281.7	263.3	226.9	Uncharacterized protein OS=Oryctolagus cuniculus OX=9986 GN=NOP2 PE=3 SV=1	1.01995	0.0285013	0.886687
G1TRM4	11641.4	7789	9619.6	10008.4	7837.2	9462	Ribosomal protein S11 OS=Oryctolagus cuniculus OX=9986 GN=RPS11 PE=1 SV=1	0.940021	-0.0892351	0.67576
G1U4Y5	5067	3393.2	3878.7	5304.2	4611	5403.9	Fc fragment of IgG receptor and transporter OS=Oryctolagus cuniculus OX=9986 GN=FCGRT PE=3 SV=1	1.24153	0.312118	0.148635
P49139	5220.2	3497.9	4421.6	3509.3	4523.7	4340.2	MAP kinase-activated protein kinase 2 (Fragment) OS=Oryctolagus cuniculus OX=9986 GN=MAPKAPK2 PE=1 SV=2	0.941665	-0.0867142	0.686017
G1SIW8	6851.2	4594.8	5492.5	4177.1	4433.9	2691.2	Crystallin zeta OS=Oryctolagus cuniculus OX=9986 GN=CRYZ PE=4 SV=1	0.667249	-0.583703	0.09202
G1TDL5	92	61.7	61.2	76.7	69.5	55.6	Nuclear export mediator factor OS=Oryctolagus cuniculus OX=9986 GN=NEMF PE=4 SV=2	0.939041	-0.0907399	0.732656
G1TVD5	2193	1470.9	1414.2	1196.5	1716.2	1605.7	Uncharacterized protein OS=Oryctolagus cuniculus OX=9986 PE=3 SV=1	0.889782	-0.168476	0.563169
G1THB6	283.2	190.1	169.7	173.5	169.5	233.5	Synergin gamma OS=Oryctolagus cuniculus OX=9986 GN=SYNRG PE=4 SV=2	0.896579	-0.157497	0.614148
G1TH06	3766.7	2531.3	2703.2	2159.3	2848.3	1830.1	RAN binding protein 1 OS=Oryctolagus cuniculus OX=9986 GN=RANBP1 PE=4 SV=2	0.759643	-0.396607	0.214399
G1SHS7	26785	18004.4	19043.3	17569.4	25047.5	15243.1	WD repeat domain 1 OS=Oryctolagus cuniculus OX=9986 GN=WDR1 PE=4 SV=1	0.906432	-0.141729	0.648946
G1SWM1	2626.4	1765.5	2215.6	1852.5	1598.1	1802.1	Uncharacterized protein OS=Oryctolagus cuniculus OX=9986 PE=1 SV=1	0.79496	-0.331046	0.158003
G1TIG2	1161.7	781	831.7	767.9	1306.5	465.1	Uncharacterized protein OS=Oryctolagus cuniculus OX=9986 PE=4 SV=1	0.915333	-0.127631	0.788849
G1SVZ3	201.4	135.5	166.5	161.4	190.8	188.9	Uncharacterized protein OS=Oryctolagus cuniculus OX=9986 PE=4 SV=1	1.07489	0.10419	0.586469
G1SPV0	922.4	620.9	730.3	630.6	814	701.3	Ubiquitin conjugating enzyme E2 K OS=Oryctolagus cuniculus OX=9986 GN=UBE2K PE=3 SV=1	0.943834	-0.083395	0.700711
G1U8I5	4522.7	3047.1	3437.9	2645.1	3510.6	1504.8	Nuclear autoantigenic sperm protein OS=Oryctolagus cuniculus OX=9986 GN=NASP PE=4 SV=1	0.695922	-0.523002	0.200898
G1T3B6	17204.3	11600.2	11402.2	11094.6	12322.8	9371.6	Hematopoietic cell-specific Lyn substrate 1 OS=Oryctolagus cuniculus OX=9986 GN=HCLS1 PE=4 SV=1	0.815511	-0.294224	0.301422
G1SJ56	92798.5	62586.7	69645.7	57545.9	71474.2	65071.9	Vinculin OS=Oryctolagus cuniculus OX=9986 GN=VCL PE=4 SV=1	0.862513	-0.213382	0.35951
G1TLE3	1021.5	689	762.1	478.8	703.7	413.2	Phosphoglycerate kinase OS=Oryctolagus cuniculus OX=9986 GN=LOC100348124 PE=3 SV=2	0.645353	-0.63184	0.094336
G1SW77	9365.5	6317.9	7644.1	6792.1	6857.2	5892.6	SERPINE1 mRNA binding protein 1 OS=Oryctolagus cuniculus OX=9986 GN=SERBP1 PE=4 SV=1	0.837719	-0.255462	0.248693
G1SD04	141	95.2	131.4	126.7	114	143.4	NudE neurodevelopment protein 1 OS=Oryctolagus cuniculus OX=9986 GN=NDE1 PE=4 SV=2	1.04489	0.0633455	0.753311
G1TW29	213	143.9	168.8	144.3	133.5	251.1	Protein phosphatase 1 regulatory subunit 16B OS=Oryctolagus cuniculus OX=9986 GN=PPP1R16B PE=4 SV=1	1.00609	0.00875507	0.981233
G1SYS4	2948.2	1994.8	1797.7	2349.6	2299.6	5523.1	Uncharacterized protein OS=Oryctolagus cuniculus OX=9986 GN=LOC100339548 PE=3 SV=1	1.50909	0.593676	0.366335
G1T6L5	2755.7	1865.9	2068.1	1822.5	2222.7	1735.5	SH3 domain binding glutamate rich protein like OS=Oryctolagus cuniculus OX=9986 GN=SH3BGRL PE=4 SV=2	0.864119	-0.210698	0.381299
G1T6N3	5091.1	3448.7	3197.7	3869.8	3834.4	3081.7	NPC intracellular cholesterol transporter 2 OS=Oryctolagus cuniculus OX=9986 GN=NPC2 PE=4 SV=1	0.918927	-0.121978	0.649611
A0A0G2JH25	791.2	536.1	566.7	482.8	714.6	252.2	Arylamine N-acetyltransferase 1 OS=Oryctolagus cuniculus OX=9986 GN=NAT1 PE=3 SV=1	0.765364	-0.385782	0.395653
G1SI19	1561.4	1058.9	1281.2	1116.4	1294.1	484.9	Nudix hydrolase 9 OS=Oryctolagus cuniculus OX=9986 GN=NUDT9 PE=4 SV=1	0.742125	-0.430266	0.305059
G1U949	8285	5619.4	6443.2	5358.8	6017.9	3177.8	Microtubule associated protein RP/EB family member 1 OS=Oryctolagus cuniculus OX=9986 GN=MAPRE1 PE=4 SV=1	0.715293	-0.483394	0.172775
U3KLX7	11419.6	7748.9	8146.7	7836.2	10407.2	8140.7	Cubilin OS=Oryctolagus cuniculus OX=9986 GN=CUBN PE=4 SV=1	0.965913	-0.0500348	0.837441
G1TNJ2	5153.6	3500.5	3735.1	3526.8	4102.4	3227.1	Zyxin OS=Oryctolagus cuniculus OX=9986 GN=ZYX PE=4 SV=1	0.876271	-0.190551	0.425687
G1T0N4	22458	15257.2	16711.7	18091.8	18469.7	22967.2	Uncharacterized protein OS=Oryctolagus cuniculus OX=9986 GN=NPM1 PE=4 SV=1	1.09374	0.129266	0.562846
G1SJH1	1977.1	1343.8	1673	1754	1622.8	1739.1	SAFB like transcription modulator OS=Oryctolagus cuniculus OX=9986 GN=SLTM PE=4 SV=2	1.02443	0.0348214	0.838916
G1SR25	807.7	549.5	726	620.5	731.4	470.9	N(alpha)-acetyltransferase 50, NatE catalytic subunit OS=Oryctolagus cuniculus OX=9986 GN=NAA50 PE=4 SV=1	0.875	-0.192645	0.463709
G1SEP8	332.5	226.2	282.7	269	274.9	136.4	E3 ubiquitin-protein ligase OS=Oryctolagus cuniculus OX=9986 GN=WWP1 PE=4 SV=1	0.808533	-0.306621	0.381479
G1TAM3	814.2	554.2	632.7	520.8	654.8	682.6	Tubulin folding cofactor B OS=Oryctolagus cuniculus OX=9986 GN=TBCB PE=4 SV=1	0.928589	-0.106888	0.631144
G1T7H0	40732	27744.8	33456.8	35941.1	31842.1	34849.1	Heterogeneous nuclear ribonucleoprotein U OS=Oryctolagus cuniculus OX=9986 GN=HNRNPU PE=4 SV=2	1.00685	0.0098545	0.955843
G1U4P4	845	576	707.3	714.2	885.5	569.3	Zinc finger protein 22 OS=Oryctolagus cuniculus OX=9986 GN=ZNF22 PE=4 SV=1	1.01912	0.0273282	0.915382
P47814	1642.5	1120.1	1113.8	1410.2	1395	939.2	Eukaryotic translation initiation factor 1A OS=Oryctolagus cuniculus OX=9986 GN=EIF1A PE=1 SV=2	0.965948	-0.0499826	0.859771
G1SXP2	236.5	161.3	233.6	152.5	208	109.5	Protein phosphatase 1 regulatory inhibitor subunit 14B OS=Oryctolagus cuniculus OX=9986 GN=PPP1R14B PE=4 SV=1	0.744378	-0.425893	0.226275
G1TES9	1379.5	941	902.1	972	1375	1288.2	Uncharacterized protein OS=Oryctolagus cuniculus OX=9986 GN=LOC100008921 PE=3 SV=1	1.12803	0.173809	0.521586
G1TTY6	1881.7	1284	1343.5	1360.2	1382.2	855.9	PML-RARA regulated adaptor molecule 1 OS=Oryctolagus cuniculus OX=9986 GN=PRAM1 PE=4 SV=1	0.797991	-0.325556	0.301693
G1TYL1	1695.5	1157.4	1327.1	1018	1106.5	1349	SAM and SH3 domain containing 3 OS=Oryctolagus cuniculus OX=9986 GN=SASH3 PE=4 SV=1	0.830981	-0.267113	0.276647
G1ST26	586.5	400.4	516.1	1226	426.4	598	Integrin subunit alpha D OS=Oryctolagus cuniculus OX=9986 GN=ITGAD PE=3 SV=2	1.49727	0.582336	0.3737
G1SV27	460.1	314.3	379.2	370.4	377.3	244.2	Oxysterol-binding protein OS=Oryctolagus cuniculus OX=9986 GN=OSBPL1A PE=3 SV=2	0.85983	-0.217877	0.422741
G1SYL9	1630.6	1115.4	1365.5	1600.2	1420.7	980.7	SAP domain containing ribonucleoprotein OS=Oryctolagus cuniculus OX=9986 GN=SARNP PE=4 SV=1	0.97327	-0.039088	0.884465
G1SE76	14111.3	9655.9	9914.6	10301.2	9476.6	11796.7	Uncharacterized protein OS=Oryctolagus cuniculus OX=9986 GN=LOC108177974 PE=1 SV=1	0.937435	-0.0932094	0.68252
G1U8G5	6443.6	4410.2	4779.8	4526.4	4702	3223.8	Uncharacterized protein OS=Oryctolagus cuniculus OX=9986 GN=LOC100343496 PE=4 SV=1	0.796502	-0.32825	0.245577
G1TCM9	2578.7	1765.4	1719.5	1784.2	2242.5	1378.8	SH3 domain-binding glutamic acid-rich-like protein OS=Oryctolagus cuniculus OX=9986 GN=SH3BGRL3 PE=3 SV=1	0.891467	-0.165747	0.589327
G1SIV1	5269.1	3608	4294.6	3581.7	4218.8	2881.8	Serine/threonine kinase 4 OS=Oryctolagus cuniculus OX=9986 GN=STK4 PE=4 SV=1	0.811004	-0.302219	0.250179
G1TRI5	1588.5	1087.9	1255.6	1085.7	1329.3	1476.4	Beta-arrestin-1 OS=Oryctolagus cuniculus OX=9986 GN=ARRB1 PE=4 SV=2	0.989674	-0.0149747	0.94551
G1SYD4	499	341.8	436.2	422.7	662.1	671.7	Eosinophil peroxidase OS=Oryctolagus cuniculus OX=9986 GN=EPX PE=4 SV=1	1.37549	0.459945	0.162145
G1SGT8	27.5	18.9	22.6	21.7	20.7	27.2	Tyrosyl-DNA phosphodiesterase 1 OS=Oryctolagus cuniculus OX=9986 GN=TDP1 PE=4 SV=1	1.0087	0.0124914	0.953269
G1TQV4	1752.7	1203.9	1360.3	1205.9	1354.4	788.2	NECAP endocytosis associated 2 OS=Oryctolagus cuniculus OX=9986 GN=NECAP2 PE=4 SV=1	0.775672	-0.366481	0.242044
G1T3P1	345.2	237.3	311.3	211.1	309.3	139.6	Acyl-CoA thioesterase 7 OS=Oryctolagus cuniculus OX=9986 GN=ACOT7 PE=4 SV=1	0.73842	-0.437486	0.254343
G1SXG7	400.2	275.2	326.8	258.7	352.1	250.8	Cytosolic iron-sulfur assembly component 2A OS=Oryctolagus cuniculus OX=9986 GN=CIAO2A PE=4 SV=1	0.859709	-0.21808	0.390531
A0A0A0MQQ6	2154.8	1482.2	1808.2	1622.3	1843.8	1084.5	Eukaryotic translation initiation factor 4E OS=Oryctolagus cuniculus OX=9986 GN=EIF4E PE=3 SV=1	0.835709	-0.258927	0.372961
G1SRI1	2495.7	1716.9	2083.1	1777.2	1675.3	1048.4	Craniofacial development protein 1 OS=Oryctolagus cuniculus OX=9986 GN=CFDP1 PE=4 SV=1	0.714917	-0.484152	0.135071
G1U446	9235.7	6354.3	7104	7529.6	7807.5	5689.2	Clathrin interactor 1 OS=Oryctolagus cuniculus OX=9986 GN=CLINT1 PE=4 SV=2	0.926514	-0.110115	0.636708
P62943	419.2	288.7	321.3	281.1	364.9	339.5	Peptidyl-prolyl cis-trans isomerase FKBP1A OS=Oryctolagus cuniculus OX=9986 GN=FKBP1A PE=1 SV=2	0.95754	-0.0625953	0.769267
G1TJ15	6999.4	4821.2	5584.7	6233.6	4574.5	5959.9	Uncharacterized protein OS=Oryctolagus cuniculus OX=9986 GN=LOC100347836 PE=4 SV=1	0.963385	-0.0538156	0.808159
P00939	13523.5	9319.3	10106.1	7328.4	9388	8078	Triosephosphate isomerase OS=Oryctolagus cuniculus OX=9986 GN=TPI1 PE=1 SV=2	0.752511	-0.410215	0.128893
G1SZ91	1028.3	708.9	734.9	470.1	798.5	311.2	Fatty acid binding protein 5 OS=Oryctolagus cuniculus OX=9986 GN=FABP5 PE=3 SV=2	0.639052	-0.645995	0.166821
P11909	473.2	326.3	374.2	332.9	425	396.4	Glutathione peroxidase 1 OS=Oryctolagus cuniculus OX=9986 GN=GPX1 PE=2 SV=2	0.983471	-0.0240456	0.905409
G1SJQ6	5373.5	3705.4	4600.7	4328.6	4780.9	4603.8	Fatty acid amide hydrolase OS=Oryctolagus cuniculus OX=9986 GN=FAAH PE=4 SV=1	1.00246	0.00355043	0.983139
G1SCU2	219.6	151.4	157	241.7	286.8	287.2	Uncharacterized protein OS=Oryctolagus cuniculus OX=9986 PE=4 SV=1	1.54489	0.6275	0.022565
G1SHV1	1129.8	779.3	817.8	906.1	906.3	576.5	U6 snRNA-associated Sm-like protein LSm2 OS=Oryctolagus cuniculus OX=9986 GN=LSM2 PE=3 SV=1	0.87605	-0.190915	0.510593
G1T1F0	2643.4	1827	2035.5	2206.1	1898.6	2160.6	Uncharacterized protein OS=Oryctolagus cuniculus OX=9986 GN=RPS14 PE=1 SV=1	0.963018	-0.0543653	0.775596
P35748	106.5	73.6	117.9	110.8	827.1	72.9	Myosin-11 OS=Oryctolagus cuniculus OX=9986 GN=MYH11 PE=2 SV=2	3.39195	1.76211	0.388265
G1TYK8	12181.7	8420.9	9506.9	10226.6	9908.9	8400.9	Phosphatidylinositol binding clathrin assembly protein OS=Oryctolagus cuniculus OX=9986 GN=PICALM PE=4 SV=1	0.947754	-0.0774155	0.69671
P07511	1408.6	974.2	1142.9	945.3	1141.1	558.2	Serine hydroxymethyltransferase, cytosolic OS=Oryctolagus cuniculus OX=9986 GN=SHMT1 PE=1 SV=2	0.750092	-0.414861	0.239799
G1T3Z6	2325.3	1608.4	2039.4	1845.8	2235.5	1904.6	Protein kinase cAMP-dependent type II regulatory subunit beta OS=Oryctolagus cuniculus OX=9986 GN=PRKAR2B PE=4 SV=1	1.00214	0.00308839	0.986728
G1TE64	7974.6	5518.6	6736.3	7121	6659.1	4700.8	Polypyrimidine tract binding protein 3 OS=Oryctolagus cuniculus OX=9986 GN=PTBP3 PE=4 SV=2	0.913562	-0.130425	0.600393
G1SDG8	3526.4	2440.9	2643.4	2451.2	2917.2	1526.5	Uncharacterized protein OS=Oryctolagus cuniculus OX=9986 GN=NOLC1 PE=4 SV=1	0.800736	-0.320601	0.3391
G1TDG7	1064.4	737	894.1	875.5	922.2	543.7	Gamma-tubulin complex component OS=Oryctolagus cuniculus OX=9986 GN=TUBGCP4 PE=3 SV=1	0.868633	-0.203181	0.481057
G1TGI9	449.7	311.5	338.7	298	309.4	201.9	Uncharacterized protein OS=Oryctolagus cuniculus OX=9986 PE=4 SV=1	0.735794	-0.442626	0.149028
G1THV8	5443.5	3772.1	4581.2	4854.7	4434	3756.8	Canopy FGF signaling regulator 3 OS=Oryctolagus cuniculus OX=9986 GN=CNPY3 PE=4 SV=1	0.945545	-0.080782	0.687619
G1TE78	3988.1	2766.2	2861.4	2517.7	3278.4	1773.6	Proliferation and apoptosis adaptor protein 15 OS=Oryctolagus cuniculus OX=9986 GN=PEA15 PE=4 SV=1	0.787223	-0.345156	0.308747
G1SHK7	586.8	407.1	397.6	445.3	540.7	499.2	Late endosomal/lysosomal adaptor, MAPK and MTOR activator 5 OS=Oryctolagus cuniculus OX=9986 GN=LAMTOR5 PE=4 SV=1	1.06734	0.0940158	0.667425
G1SNY0	5237.9	3637.4	4240.7	4082.7	3521.4	5202.5	Uncharacterized protein OS=Oryctolagus cuniculus OX=9986 GN=RPL27A PE=1 SV=1	0.97641	-0.034441	0.886737
G1SQP0	1431.3	994.1	1191.3	1243.9	1246.6	1129.4	Uncharacterized protein OS=Oryctolagus cuniculus OX=9986 GN=RAB13 PE=4 SV=1	1.00089	0.00127622	0.993948
G1T8Z3	17446.2	12116.9	12095.2	15033.1	14419.5	10466.5	Platelet and endothelial cell adhesion molecule 1 OS=Oryctolagus cuniculus OX=9986 GN=PECAM1 PE=4 SV=1	0.958251	-0.0615245	0.812137
G1SRH7	1086.9	755.3	934.6	977.5	919	829.9	Serine and arginine rich splicing factor 3 OS=Oryctolagus cuniculus OX=9986 GN=SRSF3 PE=4 SV=1	0.98185	-0.0264255	0.880635
Q9TTC6	15603.1	10846.5	12278.2	9511.3	13197.8	10716.4	Peptidyl-prolyl cis-trans isomerase A OS=Oryctolagus cuniculus OX=9986 GN=PPIA PE=2 SV=3	0.863088	-0.21242	0.376561
G1TMV1	20105	13979.7	15904.7	11946.5	19620.5	10860.6	Uncharacterized protein OS=Oryctolagus cuniculus OX=9986 GN=DSTN PE=3 SV=1	0.848732	-0.236619	0.487182
G1TYW1	5337.4	3713.4	4794.6	4490.8	3985	3126.5	Tumor protein D52 like 2 OS=Oryctolagus cuniculus OX=9986 GN=TPD52L2 PE=4 SV=2	0.83799	-0.254995	0.295364
P14755	8900.8	6194.6	6643.3	4625.1	5127.5	2380.9	Lambda-crystallin OS=Oryctolagus cuniculus OX=9986 GN=CRYL1 PE=1 SV=3	0.558152	-0.84127	0.05452
G1SJL9	575.6	400.6	547.8	575.1	475	400.6	PAF1 homolog, Paf1/RNA polymerase II complex component OS=Oryctolagus cuniculus OX=9986 GN=PAF1 PE=4 SV=1	0.951903	-0.0711135	0.758422
G1T9C3	3656.2	2545.8	2726.4	2254.8	2816.9	2370.8	Wiskott-Aldrich syndrome OS=Oryctolagus cuniculus OX=9986 GN=WAS PE=4 SV=2	0.833576	-0.262614	0.266958
G1TAW7	1615.4	1124.9	1352.9	1038.8	1309	509.8	Eukaryotic translation initiation factor 2A OS=Oryctolagus cuniculus OX=9986 GN=EIF2A PE=3 SV=1	0.698133	-0.518426	0.207453
G1SZ94	2846	1985.9	2542.3	2219.4	2116.3	1495	Uncharacterized protein OS=Oryctolagus cuniculus OX=9986 GN=AGFG1 PE=4 SV=1	0.790689	-0.338818	0.203202
G1SE94	206	143.8	187.3	154.5	267.3	171	Uncharacterized protein OS=Oryctolagus cuniculus OX=9986 GN=MCEMP1 PE=4 SV=2	1.1037	0.142355	0.664419
G1SER8	8794.7	6142	6731.2	5391.2	7298	7021	Profilin OS=Oryctolagus cuniculus OX=9986 GN=PFN1 PE=3 SV=1	0.90965	-0.136617	0.549754
G1T5H5	427.2	298.4	358.5	331.4	316.6	521.9	Ribosome biogenesis regulatory protein OS=Oryctolagus cuniculus OX=9986 GN=RRS1 PE=3 SV=1	1.07914	0.109887	0.725306
G1U1Q8	265.5	185.5	233.2	142.5	178.1	67.6	Macrophage migration inhibitory factor OS=Oryctolagus cuniculus OX=9986 GN=MIF PE=4 SV=1	0.567378	-0.817618	0.069214
G1T822	1007.7	704.3	740.9	673.8	827.6	686.4	Centrosomal protein 290 OS=Oryctolagus cuniculus OX=9986 GN=CEP290 PE=4 SV=1	0.891924	-0.165007	0.457554
G1TYK6	5572.7	3895.3	4406.9	3576.1	4245.2	2751.8	Vasodilator stimulated phosphoprotein OS=Oryctolagus cuniculus OX=9986 GN=VASP PE=4 SV=1	0.762031	-0.392078	0.169683
G1T7B3	24219.5	16946.2	23285.5	25847.7	26925	19400.2	ATP binding cassette subfamily A member 6 OS=Oryctolagus cuniculus OX=9986 GN=ABCA6 PE=4 SV=2	1.11981	0.16325	0.476125
G1T7D0	8751.3	6125.5	7183.7	7165.4	7058.4	5300.1	Serine/arginine repetitive matrix 2 OS=Oryctolagus cuniculus OX=9986 GN=SRRM2 PE=4 SV=2	0.885016	-0.176225	0.434048
G1T168	9842.6	6893	7980.4	8439	6446.6	13723	Uncharacterized protein OS=Oryctolagus cuniculus OX=9986 GN=RPS10 PE=1 SV=2	1.15749	0.211003	0.60812
G1T845	22874.8	16022.4	17700.8	20910.1	21135.5	16245.6	N-ethylmaleimide sensitive factor, vesicle fusing ATPase OS=Oryctolagus cuniculus OX=9986 GN=NSF PE=4 SV=1	1.02992	0.0425267	0.839148
G1SEU7	4656.3	3261.8	3865.3	3655.2	3965.6	2478.3	GTPase, IMAP family member 8 OS=Oryctolagus cuniculus OX=9986 GN=GIMAP8 PE=4 SV=2	0.857062	-0.222529	0.40722
G1TQ82	576.9	404.2	519.1	545.6	407.5	214.1	Uncharacterized protein OS=Oryctolagus cuniculus OX=9986 PE=4 SV=1	0.77803	-0.362102	0.364966
G1SZN9	3270.7	2292.2	2657.1	2497.5	2644.4	1847.6	Tyrosine-protein kinase OS=Oryctolagus cuniculus OX=9986 GN=BTK PE=3 SV=1	0.850304	-0.233949	0.336738
G1TRV4	1706.2	1195.8	1378.6	1657.2	1092.8	2711.6	Uncharacterized protein OS=Oryctolagus cuniculus OX=9986 PE=4 SV=1	1.2759	0.351511	0.472911
G1T8F8	504.6	354	388.2	478	453.3	532.5	Uncharacterized protein OS=Oryctolagus cuniculus OX=9986 GN=RPL22L1 PE=4 SV=1	1.17405	0.231489	0.230865
G1SZ85	2823.7	1983	2264.3	2032	2690.6	1119.2	3'(2'), 5'-bisphosphate nucleotidase 1 OS=Oryctolagus cuniculus OX=9986 GN=BPNT1 PE=4 SV=1	0.826163	-0.275502	0.473432
G1SYL1	12893.7	9055.5	11241.2	9816.4	10952.2	6564.2	Adenosine deaminase OS=Oryctolagus cuniculus OX=9986 GN=ADA PE=3 SV=2	0.823515	-0.280133	0.32014
U3KM96	14113.6	9915.5	10777.1	11730.3	13567.7	27035.2	RAP1B, member of RAS oncogene family OS=Oryctolagus cuniculus OX=9986 GN=RAP1B PE=4 SV=1	1.50356	0.588382	0.3068
G1TZ40	1381.5	970.7	1044	1106.6	1517.2	1014.7	Sperm antigen with calponin homology and coiled-coil domains 1 OS=Oryctolagus cuniculus OX=9986 GN=SPECC1 PE=4 SV=2	1.07134	0.0994218	0.706531
G1SS07	2874.4	2019.8	2275.2	1801.6	2349.1	1275.2	Uncharacterized protein OS=Oryctolagus cuniculus OX=9986 GN=UBE2V2 PE=4 SV=1	0.756814	-0.401989	0.220213
P07855	217.6	153	153.8	131.1	160.4	74.5	Fatty acid synthase (Fragment) OS=Oryctolagus cuniculus OX=9986 GN=FASN PE=1 SV=1	0.697941	-0.518823	0.185587
G1TAN9	513.5	361.2	396.9	337.2	391.7	148.6	Cytoplasmic aconitate hydratase OS=Oryctolagus cuniculus OX=9986 GN=ACO1 PE=3 SV=1	0.690075	-0.535175	0.20484
G1TCW1	13734.1	9660.1	12526.1	12341.6	11595.4	10452.4	Transferrin receptor OS=Oryctolagus cuniculus OX=9986 GN=TFRC PE=4 SV=2	0.957381	-0.0628349	0.720166
G1SFZ1	2302.5	1619.6	1870.6	1708.1	1886.3	1379.2	DNA helicase OS=Oryctolagus cuniculus OX=9986 GN=MCM4 PE=3 SV=2	0.858598	-0.219945	0.333852
G1SNS3	8026.8	5646.8	6828.5	7850.6	7067.1	6963.3	Cancer susceptibility 4 OS=Oryctolagus cuniculus OX=9986 GN=CASC4 PE=4 SV=2	1.06726	0.0939076	0.569132
G1SKR3	1288.9	907.1	858.5	949.2	1350.1	1374.1	Tetraspanin OS=Oryctolagus cuniculus OX=9986 GN=TEAD4 PE=3 SV=2	1.20262	0.26618	0.346829
G1SUX1	1596.6	1125	1251.1	1297.7	1392.8	875.8	Metalloproteinase inhibitor 3 OS=Oryctolagus cuniculus OX=9986 GN=TIMP3 PE=4 SV=1	0.897702	-0.155691	0.558283
G1TM81	4784.2	3373.8	3528.3	2713.7	4108.1	1885.2	Translationally-controlled tumor protein OS=Oryctolagus cuniculus OX=9986 GN=TPT1 PE=3 SV=1	0.74506	-0.424571	0.275811
G1SYV9	155002	109350	115533	104272	140713	132713	Talin 1 OS=Oryctolagus cuniculus OX=9986 GN=TLN1 PE=4 SV=1	0.994241	-0.0083325	0.969751
G1SZR8	3954.4	2789.8	3051.7	2630.9	3274.1	3079.3	Uncharacterized protein OS=Oryctolagus cuniculus OX=9986 PE=4 SV=1	0.917149	-0.124772	0.536754
G1T714	313.5	221.3	270.2	300.7	360.7	389.4	Translational activator of cytochrome c oxidase I OS=Oryctolagus cuniculus OX=9986 GN=TACO1 PE=4 SV=1	1.30534	0.384428	0.093073
G1U2G9	691.6	488.4	450.8	389.2	377.8	756.1	Uncharacterized protein OS=Oryctolagus cuniculus OX=9986 GN=MCP2 PE=4 SV=1	0.933959	-0.0985689	0.816667
G1SP51	8602.8	6078.2	6708.4	6705	5651	6707.4	Ribosomal protein S13 OS=Oryctolagus cuniculus OX=9986 GN=RPS13 PE=1 SV=1	0.891255	-0.16609	0.406303
G1T625	3981.5	2814.4	3446.4	2804.5	3017	2115.4	Uncharacterized protein OS=Oryctolagus cuniculus OX=9986 GN=PLA2G12A PE=3 SV=2	0.774914	-0.367892	0.150879
G1SN91	379.6	268.4	286.7	220.1	234.5	240	Uncharacterized protein OS=Oryctolagus cuniculus OX=9986 GN=DHFR PE=4 SV=1	0.743126	-0.428321	0.083754
G1TWL2	276	195.2	241.7	240.4	220.1	127.3	Uncharacterized protein OS=Oryctolagus cuniculus OX=9986 PE=4 SV=2	0.82452	-0.278374	0.376511
G1SKZ3	8472.9	5992.4	6583.9	5393.5	6424.8	3632.6	Proliferating cell nuclear antigen OS=Oryctolagus cuniculus OX=9986 GN=PCNA PE=3 SV=1	0.734037	-0.446075	0.166931
G1SZ76	18092	12796.2	14188.6	13504	14020.3	14262	Lupus La protein homolog OS=Oryctolagus cuniculus OX=9986 GN=SSB PE=4 SV=1	0.927002	-0.109356	0.530851
G1T703	9757.5	6905.4	8031.9	8769.2	10281.8	9634.5	Nucleoporin 210 OS=Oryctolagus cuniculus OX=9986 GN=NUP210 PE=4 SV=1	1.1616	0.216115	0.229124
G1T8H4	158.1	111.9	132.9	146	138.6	184.1	ERCC excision repair 4, endonuclease catalytic subunit OS=Oryctolagus cuniculus OX=9986 GN=ERCC4 PE=4 SV=1	1.16332	0.218243	0.321821
G1TBS1	3787.1	2681.9	3104.1	2494.7	2988.1	1663.7	Parkinsonism associated deglycase OS=Oryctolagus cuniculus OX=9986 GN=PARK7 PE=4 SV=1	0.746519	-0.421749	0.183101
G1SST8	2534.1	1796.8	1868.6	2619.9	2455.5	8740.1	Uncharacterized protein OS=Oryctolagus cuniculus OX=9986 PE=4 SV=1	2.22849	1.15606	0.289556
A0A0G2JH23	2105.1	1492.6	1374.2	1500.1	1650.8	1833.5	Uncharacterized protein OS=Oryctolagus cuniculus OX=9986 PE=3 SV=1	1.00251	0.00362238	0.987305
G1SKF1	24300.1	17241.4	16358.4	17136.8	25859.5	21507.5	Thrombospondin 1 OS=Oryctolagus cuniculus OX=9986 GN=THBS1 PE=4 SV=2	1.11406	0.155823	0.569561
G1SL86	322.9	229.1	269.9	268.5	282.4	425.2	Uncharacterized protein OS=Oryctolagus cuniculus OX=9986 PE=4 SV=2	1.18761	0.248066	0.417921
G1SK12	22313.5	15848.4	16783.7	14375.2	19549.5	15719.7	Tyrosine-protein phosphatase non-receptor type OS=Oryctolagus cuniculus OX=9986 GN=PTPN6 PE=3 SV=1	0.903519	-0.146373	0.525547
G1T953	1053	748.2	917.5	837.3	1023.3	371.4	Dynamin 2 OS=Oryctolagus cuniculus OX=9986 GN=DNM2 PE=3 SV=1	0.820981	-0.284579	0.488676
G1SM91	2369.3	1683.4	1978.8	1845.1	2017.9	1243.2	Fumarylacetoacetate hydrolase OS=Oryctolagus cuniculus OX=9986 GN=FAH PE=4 SV=1	0.846589	-0.240266	0.372663
G1SZZ0	337.1	239.6	275.7	351.7	452.3	216.5	Uncharacterized protein OS=Oryctolagus cuniculus OX=9986 GN=CD200R1 PE=4 SV=2	1.19721	0.259674	0.491106
G1SIJ7	11440.8	8130.7	9797	9637	9290	9984.2	DExD-box helicase 21 OS=Oryctolagus cuniculus OX=9986 GN=DDX21 PE=4 SV=1	0.984429	-0.0226409	0.883495
G1SWW7	638.9	454.8	566.8	566	550.4	585.6	Serine and arginine rich splicing factor 5 OS=Oryctolagus cuniculus OX=9986 GN=SRSF5 PE=4 SV=1	1.02499	0.0356126	0.812209
G1SLF5	718.5	511.8	561.1	520	671.1	562.2	RNA exonuclease 2 OS=Oryctolagus cuniculus OX=9986 GN=REXO2 PE=3 SV=2	0.978732	-0.0310142	0.876812
G1SZA2	1448.6	1033	973.9	1018.1	1438.8	559.2	Sushi domain containing 1 OS=Oryctolagus cuniculus OX=9986 GN=SUSD1 PE=4 SV=2	0.87284	-0.196211	0.645219
G1TN08	8074.1	5757.7	5954	7619	8466.1	7680.3	Hippocalcin like 1 OS=Oryctolagus cuniculus OX=9986 GN=HPCAL1 PE=4 SV=1	1.20113	0.264397	0.168482
O46638	4109.7	2932.2	3188.1	3296.8	3558.9	2717	Peptidyl-prolyl cis-trans isomerase FKBP3 OS=Oryctolagus cuniculus OX=9986 GN=FKBP3 PE=2 SV=2	0.935748	-0.095808	0.641387
G1U118	6346.1	4528.8	4998.9	4611.4	4788.6	4091.8	Uncharacterized protein OS=Oryctolagus cuniculus OX=9986 PE=4 SV=1	0.849941	-0.234565	0.245117
G1SFM3	476.1	339.8	420.6	364.1	465.9	348.4	Receptor-interacting serine/threonine-protein kinase 2 OS=Oryctolagus cuniculus OX=9986 GN=RIPK2 PE=3 SV=2	0.953013	-0.0694322	0.738262
U3KNH8	151.1	107.9	134.6	121.2	141.7	68.2	PDX1 C-terminal inhibiting factor 1 OS=Oryctolagus cuniculus OX=9986 GN=PCIF1 PE=4 SV=1	0.841209	-0.249464	0.45581
G1TGV6	2038.5	1457.2	1874.5	1994.6	2005.5	1212	Solute carrier family 27 member 3 OS=Oryctolagus cuniculus OX=9986 GN=SLC27A3 PE=4 SV=1	0.97056	-0.0431107	0.875081
G1SKD3	480.3	343.5	436.3	478.9	375.9	154	Mediator of RNA polymerase II transcription subunit 6 OS=Oryctolagus cuniculus OX=9986 GN=MED6 PE=3 SV=2	0.800571	-0.320899	0.465696
G1SL40	609.9	436.2	556.6	502.7	489.9	275.4	QKI, KH domain containing RNA binding OS=Oryctolagus cuniculus OX=9986 GN=QKI PE=4 SV=1	0.791165	-0.337949	0.28223
G1T6W3	2367.5	1694.3	2224.8	2367.9	2417.7	4282.2	Uncharacterized protein OS=Oryctolagus cuniculus OX=9986 PE=4 SV=1	1.4424	0.528472	0.234234
G1SRX9	417.7	299.1	372.4	376.4	375.7	733.1	Ribonuclease P/MRP subunit p30 OS=Oryctolagus cuniculus OX=9986 GN=RPP30 PE=4 SV=2	1.36357	0.447389	0.34685
G1T6T5	5767	4129.6	4785.4	3734.8	4697.1	2678.7	Cysteine and histidine rich domain containing 1 OS=Oryctolagus cuniculus OX=9986 GN=CHORDC1 PE=4 SV=1	0.75675	-0.402111	0.188763
G1SJH8	217.3	155.7	190.4	219.5	207.4	172.1	RNA binding motif protein 42 OS=Oryctolagus cuniculus OX=9986 GN=RBM42 PE=4 SV=2	1.06319	0.0883967	0.630296
G1SL80	1157.3	829.5	922	813.2	1027.2	948.9	Uroporphyrinogen decarboxylase OS=Oryctolagus cuniculus OX=9986 GN=UROD PE=3 SV=1	0.958918	-0.0605206	0.748351
G1SEZ3	93.8	67.3	84.9	100.9	102	306.7	Uncharacterized protein OS=Oryctolagus cuniculus OX=9986 GN=LOC100339409 PE=4 SV=1	2.07154	1.05071	0.271001
G1SY05	891.7	639.7	771.2	617	669.3	692.2	Sorting nexin family member 30 OS=Oryctolagus cuniculus OX=9986 GN=SNX30 PE=4 SV=2	0.859246	-0.218857	0.228713
G1SIE2	198.3	142.5	128.8	122.5	126.6	53.9	DNA topoisomerase 2 OS=Oryctolagus cuniculus OX=9986 GN=TOP2A PE=3 SV=1	0.64523	-0.632115	0.155135
G1SDY5	35577.6	25575.5	26358.9	22992.5	31817.3	29243	Uncharacterized protein OS=Oryctolagus cuniculus OX=9986 GN=YWHAZ PE=3 SV=1	0.960472	-0.0581845	0.794645
G1T5E2	304.9	219.2	405	266.3	299.4	172.4	Uncharacterized protein OS=Oryctolagus cuniculus OX=9986 PE=4 SV=1	0.794425	-0.332017	0.388032
G1T5B0	184.3	132.5	166	185.9	187.7	204.4	Mitochondrial ribosomal protein L16 OS=Oryctolagus cuniculus OX=9986 GN=MRPL16 PE=3 SV=1	1.19718	0.259644	0.122896
G1SWW8	1076.5	774	921	861.4	942.4	957.7	Serine/threonine-protein phosphatase OS=Oryctolagus cuniculus OX=9986 GN=PPP1CC PE=3 SV=1	0.996392	-0.00521466	0.972923
G1T5Q9	15451.8	11111.8	10419.3	10682.9	12321.2	22010.7	Bactericidal permeability-increasing protein OS=Oryctolagus cuniculus OX=9986 GN=BPI PE=4 SV=2	1.21718	0.283541	0.527078
G1TG89	6284.8	4521.1	5201.6	5550.9	4748	6201.9	Uncharacterized protein OS=Oryctolagus cuniculus OX=9986 GN=RPS15A PE=1 SV=1	1.03082	0.0437882	0.816528
G1SL83	9163.9	6592.9	6671.3	7903.1	6036.3	11103.7	V-set and immunoglobulin domain containing 4 OS=Oryctolagus cuniculus OX=9986 GN=VSIG4 PE=4 SV=2	1.1166	0.159106	0.635827
G1SFE9	4229.9	3043.3	3129.2	2708.8	3017.2	1504.7	Uncharacterized protein OS=Oryctolagus cuniculus OX=9986 GN=AHSA1 PE=4 SV=1	0.695099	-0.52471	0.152354
G1T3V5	13403.8	9646.3	11550.2	11446.4	10206.8	10789.4	Uncharacterized protein OS=Oryctolagus cuniculus OX=9986 GN=TMPO PE=4 SV=2	0.937639	-0.0928955	0.563105
G1TA50	405.3	291.7	371.2	305.9	304.7	204.1	Ubiquitin like modifier activating enzyme 5 OS=Oryctolagus cuniculus OX=9986 GN=UBA5 PE=4 SV=1	0.762685	-0.390841	0.150864
G1SRL2	1130.5	813.8	947.7	1067.4	1042.5	1296.8	Nuclear cap-binding protein subunit 2 OS=Oryctolagus cuniculus OX=9986 GN=NCBP2 PE=3 SV=1	1.17797	0.236308	0.233551
Q9XS70	9632	6934.6	6995.2	7190.6	8207.2	7050.4	Coronin-1B OS=Oryctolagus cuniculus OX=9986 GN=CORO1B PE=1 SV=1	0.952737	-0.0698501	0.71897
G1TV31	4987.6	3592.6	4143	3299.4	4292.1	1972	Actin-related protein 2/3 complex subunit 5 OS=Oryctolagus cuniculus OX=9986 GN=ARPC5 PE=3 SV=1	0.751658	-0.411852	0.250809
G1SGZ2	3343	2409	2697	2581.2	2498.4	1999.1	Protein phosphatase 1 regulatory subunit 18 OS=Oryctolagus cuniculus OX=9986 GN=PPP1R18 PE=4 SV=1	0.837815	-0.255296	0.239268
G1U723	10104.7	7283.4	7852.3	6492.8	7612.8	4942.1	3alpha/17beta/20alpha-hydroxysteroid dehydrogenase OS=Oryctolagus cuniculus OX=9986 GN=PGER5 PE=2 SV=1	0.754651	-0.406118	0.149305
G1SXX2	2839.8	2048.6	2400.7	2328.1	2271.2	1612	Uncharacterized protein OS=Oryctolagus cuniculus OX=9986 PE=4 SV=2	0.852135	-0.230846	0.330099
G1TD13	2708	1954.8	2021.4	2378.4	3227.4	1994.6	Beta-2-microglobulin OS=Oryctolagus cuniculus OX=9986 GN=B2M PE=2 SV=1	1.13707	0.185321	0.522778
G1U6G2	7801.4	5632.8	6956.4	7316.9	7581.5	6231.1	Myeloid cell nuclear differentiation antigen OS=Oryctolagus cuniculus OX=9986 GN=MNDA PE=4 SV=2	1.03624	0.051354	0.760395
G1SYW5	1665.7	1203	1777	1486.7	1505.3	1016	Heterogeneous nuclear ribonucleoprotein L like OS=Oryctolagus cuniculus OX=9986 GN=HNRNPLL PE=4 SV=1	0.862733	-0.213014	0.421778
G1TN05	632.8	457.2	534.5	495.4	950.4	574	Myosin IE OS=Oryctolagus cuniculus OX=9986 GN=MYO1E PE=3 SV=1	1.24334	0.314216	0.427386
G1T4J3	153	110.6	155.2	154.7	138.7	97.9	StAR related lipid transfer domain containing 3 OS=Oryctolagus cuniculus OX=9986 GN=STARD3 PE=4 SV=2	0.934336	-0.0979866	0.701901
G1TH09	3012.2	2177	2633.3	2415.5	2178.2	1808.5	Uncharacterized protein OS=Oryctolagus cuniculus OX=9986 GN=LOC100341006 PE=4 SV=1	0.818434	-0.289062	0.188673
G1T040	5074.9	3668.9	4050.9	3997.1	3671.4	4157.3	Uncharacterized protein OS=Oryctolagus cuniculus OX=9986 GN=LOC100353469 PE=1 SV=1	0.924273	-0.113609	0.506747
G1SH01	359.2	259.7	322.9	269.4	311.6	324.7	Uncharacterized protein OS=Oryctolagus cuniculus OX=9986 GN=MDC1 PE=4 SV=1	0.961669	-0.0563877	0.737738
G1TQR0	75808.4	54835.9	54883.2	66032.8	79040.9	89418	Actinin alpha 1 OS=Oryctolagus cuniculus OX=9986 GN=ACTN1 PE=4 SV=1	1.26392	0.337904	0.168506
G1TJ38	6932.1	5015.7	5788.1	4804.4	6070.2	3263.9	Phosphatidylinositol transfer protein alpha isoform OS=Oryctolagus cuniculus OX=9986 GN=PITPNA PE=4 SV=1	0.797168	-0.327044	0.28994
G1TTN9	1950.6	1412.8	1747.6	1549.9	1804.4	1406.5	Regulator of chromosome condensation 2 OS=Oryctolagus cuniculus OX=9986 GN=RCC2 PE=4 SV=1	0.931481	-0.102402	0.582127
G1SJZ9	4609.2	3338.8	3680.4	3063.2	4970.7	3055.5	Thioredoxin OS=Oryctolagus cuniculus OX=9986 GN=LOC100359245 PE=3 SV=1	0.953648	-0.0684712	0.82049
G1TX70	1573.9	1140.5	1553.4	1442.2	1333	924.3	Uncharacterized protein OS=Oryctolagus cuniculus OX=9986 PE=1 SV=1	0.86684	-0.206162	0.421256
G1T035	5708.5	4136.8	5020.1	4327	5325.7	3793.3	Protein kinase C delta type OS=Oryctolagus cuniculus OX=9986 GN=PRKCD PE=3 SV=2	0.904517	-0.14478	0.500285
G1SYK5	3084.9	2235.7	2483.8	2399.9	2822.7	1864.1	Interferon regulatory factor 5 OS=Oryctolagus cuniculus OX=9986 GN=IRF5 PE=4 SV=2	0.908039	-0.139174	0.55801
U3KNB3	8238.3	5971.7	6461.5	6475.8	6123.1	4451.2	High mobility group nucleosome binding domain 5 OS=Oryctolagus cuniculus OX=9986 GN=HMGN5 PE=4 SV=1	0.824812	-0.277863	0.263879
G1SQN6	552.3	400.7	482.1	427	500.3	315.8	BCL2 interacting protein 2 OS=Oryctolagus cuniculus OX=9986 GN=BNIP2 PE=4 SV=2	0.866211	-0.20721	0.407682
G1T5J0	462.6	335.7	396.9	341.6	613.9	617.2	Uncharacterized protein OS=Oryctolagus cuniculus OX=9986 GN=DMBT1 PE=4 SV=1	1.31585	0.395992	0.270114
G1TX03	1720.3	1248.7	1419.4	1567.6	1595.5	1316.3	RNA-binding protein 8A OS=Oryctolagus cuniculus OX=9986 GN=RBM8A PE=3 SV=1	1.02074	0.0296098	0.862238
G1TPV0	7389.3	5366.5	6146.2	6128	4776	5369.5	60S ribosomal protein L13 OS=Oryctolagus cuniculus OX=9986 GN=LOC100342098 PE=1 SV=1	0.860941	-0.216014	0.28306
G1SJE8	42.2	30.7	44.2	40.5	37.5	100.2	G-patch domain containing 8 OS=Oryctolagus cuniculus OX=9986 GN=GPATCH8 PE=4 SV=1	1.52178	0.605756	0.383911
G1SF14	222.8	162	171.5	131.1	158.3	109.3	Major facilitator superfamily domain containing 4A OS=Oryctolagus cuniculus OX=9986 GN=MFSD4A PE=4 SV=2	0.7167	-0.480559	0.090115
G1TRW8	13798.4	10032.9	7888	9272	10568.7	25503.6	Lipocalin 2 OS=Oryctolagus cuniculus OX=9986 GN=LCN2 PE=3 SV=1	1.42955	0.51556	0.454349
G1TUT9	10234.9	7450.9	9451.1	8890.6	7702.4	10455.2	Uncharacterized protein OS=Oryctolagus cuniculus OX=9986 PE=1 SV=1	0.996731	-0.0047239	0.980719
G1SWI6	6907.4	5028.7	5660.5	6256.5	5592	11728.3	Uncharacterized protein OS=Oryctolagus cuniculus OX=9986 GN=RPL9 PE=4 SV=1	1.33985	0.422071	0.379804
G1SG80	7603.2	5535.4	6382	7530.1	7764.9	7503.4	Adenylate kinase 2, mitochondrial OS=Oryctolagus cuniculus OX=9986 GN=AK2 PE=3 SV=1	1.16792	0.223935	0.145684
G1TA26	421.6	307	364.4	450.6	474.9	546.8	Solute carrier family 15 member 3 OS=Oryctolagus cuniculus OX=9986 GN=SLC15A3 PE=4 SV=2	1.34703	0.429779	0.045058
P36367	487.7	355.1	424.9	540.2	394.2	270.7	Dimethylaniline monooxygenase [N-oxide-forming] 4 OS=Oryctolagus cuniculus OX=9986 GN=FMO4 PE=2 SV=2	0.950619	-0.0730609	0.821827
G1SRI8	26207.6	19083.8	19843.9	22142.9	25861.4	21454.2	Hexokinase 1 OS=Oryctolagus cuniculus OX=9986 GN=HK1 PE=3 SV=2	1.06637	0.0927122	0.614308
B7NZQ6	11114.6	8094.2	8833.9	7434.8	9973.6	6349.6	Rab GDP dissociation inhibitor OS=Oryctolagus cuniculus OX=9986 GN=GDI1 PE=3 SV=1	0.847208	-0.239212	0.367437
G1SLT8	6637.6	4836.3	5292	5944.4	5513.9	4650.3	Heterogeneous nuclear ribonucleoprotein H3 OS=Oryctolagus cuniculus OX=9986 GN=HNRNPH3 PE=4 SV=1	0.960795	-0.0576995	0.756993
G1SL95	1816.2	1323.5	1504.3	1203	1618.1	706.1	Phosphomannomutase OS=Oryctolagus cuniculus OX=9986 GN=PMM2 PE=3 SV=1	0.759518	-0.396844	0.28292
G1SDF7	2241	1633.3	1848.7	1817.1	1843.8	1697.9	Trafficking protein particle complex 12 OS=Oryctolagus cuniculus OX=9986 GN=TRAPPC12 PE=4 SV=1	0.936362	-0.0948617	0.544313
G1SFN1	6264.3	4567.7	5226.6	6316.8	5977.7	4195.5	Lipase OS=Oryctolagus cuniculus OX=9986 GN=LIPA PE=3 SV=2	1.02686	0.0382451	0.869722
G1SE95	132138	96422.8	111973	103038	130246	146673	Uncharacterized protein OS=Oryctolagus cuniculus OX=9986 PE=4 SV=1	1.11577	0.158034	0.467736
G1TWS2	2371.3	1730.7	1888.7	1745.5	2036.8	1375.8	BCL2 associated X, apoptosis regulator OS=Oryctolagus cuniculus OX=9986 GN=BAX PE=4 SV=1	0.861018	-0.215885	0.364445
G1U5Q7	8284.3	6046.8	6914.2	6089.1	7823.7	5305.1	Actin-related protein 2/3 complex subunit 4 OS=Oryctolagus cuniculus OX=9986 GN=ARPC4 PE=3 SV=1	0.904572	-0.144693	0.531897
G1SH81	2434.3	1777.2	1901.4	1805.3	2194.1	2270.5	Uncharacterized protein OS=Oryctolagus cuniculus OX=9986 PE=4 SV=2	1.02568	0.0365849	0.843013
O19049	16780	12251.2	13969.2	15712.5	14434.8	21614.6	Heterogeneous nuclear ribonucleoprotein K OS=Oryctolagus cuniculus OX=9986 GN=HNRNPK PE=2 SV=1	1.20375	0.267541	0.320132
G1TJB0	203.7	148.8	222.4	181.5	182.4	508.1	Uncharacterized protein OS=Oryctolagus cuniculus OX=9986 GN=PRPF18 PE=4 SV=2	1.51679	0.601018	0.422474
G1SM24	164.5	120.1	161.1	163.5	150.4	190.9	Midasin OS=Oryctolagus cuniculus OX=9986 GN=MDN1 PE=3 SV=2	1.1326	0.179638	0.34923
G1SI20	23475.8	17149.9	19718.8	14935	17123.2	10754.2	Isocitrate dehydrogenase [NADP] OS=Oryctolagus cuniculus OX=9986 GN=IDH1 PE=3 SV=1	0.709466	-0.495195	0.08956
U3KPD5	6531.8	4773.4	5414.1	5426.8	4815.7	4388.9	Ribosomal protein L37 OS=Oryctolagus cuniculus OX=9986 GN=RPL37 PE=1 SV=1	0.87512	-0.192447	0.307466
G1TKL0	4770.2	3486.5	3579.8	4228.8	3938.9	8038.1	Small nuclear ribonucleoprotein polypeptide A OS=Oryctolagus cuniculus OX=9986 GN=SNRPA PE=4 SV=1	1.36914	0.453268	0.351976
G1U387	6617.2	4837.4	4976	6281.3	7640.8	5205	Uncharacterized protein OS=Oryctolagus cuniculus OX=9986 GN=GIMAP1 PE=4 SV=1	1.16412	0.219234	0.377966
P30946	45176.5	33033.4	36342.3	29980.2	34207	30741.5	Heat shock protein HSP 90-alpha OS=Oryctolagus cuniculus OX=9986 GN=HSP90AA1 PE=1 SV=2	0.828694	-0.271089	0.164606
G1TJP0	14.2	10.4	11.1	8.3	7.5	0	Ubiquilin 2 OS=Oryctolagus cuniculus OX=9986 GN=UBQLN2 PE=4 SV=1	7.4837	2.90375	0.395632
G1U5A2	89.3	65.3	71.2	77.4	79.7	137.8	Chromosome 2 open reading frame 88 OS=Oryctolagus cuniculus OX=9986 GN=C2orf88 PE=4 SV=1	1.30602	0.38518	0.335106
G1TPM1	3932.9	2879.2	3234.5	3421.7	3646.8	3154.7	Uncharacterized protein OS=Oryctolagus cuniculus OX=9986 GN=PPP1R9B PE=4 SV=1	1.01758	0.0251394	0.871184
G1TBY5	381.7	279.6	316.8	263.9	427.6	435.8	GIT ArfGAP 1 OS=Oryctolagus cuniculus OX=9986 GN=GIT1 PE=4 SV=2	1.15254	0.204818	0.47687
G1SPF5	24052.8	17623.5	18360	13552	16995.3	24348.1	Uncharacterized protein OS=Oryctolagus cuniculus OX=9986 GN=PGAM1 PE=4 SV=1	0.91437	-0.12915	0.673556
G1SH30	1981.5	1451.9	1578.3	1481.5	1670.7	1141.4	Ubiquitin like domain containing CTD phosphatase 1 OS=Oryctolagus cuniculus OX=9986 GN=UBLCP1 PE=4 SV=2	0.856715	-0.223113	0.342464
G1TJP4	5317.2	3897.9	4230.5	5145.5	5607.3	4029.9	Chitinase 3 like 1 OS=Oryctolagus cuniculus OX=9986 GN=CHI3L1 PE=3 SV=2	1.09945	0.136775	0.521274
G1SFT2	832.3	610.8	668.9	686.7	664	998.7	CWC15 spliceosome associated protein homolog OS=Oryctolagus cuniculus OX=9986 GN=CWC15 PE=4 SV=1	1.11241	0.153682	0.566154
B7NZQ0	4059.2	2979.4	3313.4	3364.1	3215.9	1930	Emerin (Predicted) OS=Oryctolagus cuniculus OX=9986 GN=EMD PE=4 SV=1	0.822063	-0.282679	0.33147
G1TAR1	99.9	73.3	109.4	176	104.9	385	Uncharacterized protein OS=Oryctolagus cuniculus OX=9986 GN=SLC11A1 PE=3 SV=2	2.35633	1.23654	0.206158
G1SVH0	15673.1	11506.8	12987.5	11680.7	12521.2	8662.6	Adenosylhomocysteinase OS=Oryctolagus cuniculus OX=9986 GN=AHCY PE=3 SV=2	0.818188	-0.289496	0.22339
U3KPD4	261.6	192	267.1	225.2	243.6	170.2	ZFP36 ring finger protein like 2 OS=Oryctolagus cuniculus OX=9986 GN=ZFP36L2 PE=4 SV=1	0.886638	-0.173583	0.45198
G1SDP7	422.3	310.1	420.1	366.2	352.3	166	UTP15, small subunit processome component OS=Oryctolagus cuniculus OX=9986 GN=UTP15 PE=4 SV=1	0.767462	-0.381833	0.296182
G1U5W2	1062.3	780.4	830.5	884.7	843.7	338.8	Uncharacterized protein OS=Oryctolagus cuniculus OX=9986 GN=LOC103348655 PE=4 SV=1	0.773305	-0.370891	0.360596
G1TFM5	7653.5	5625.2	6530.4	6648.2	5513.3	11430.7	Ribosomal protein S5 OS=Oryctolagus cuniculus OX=9986 GN=RPS5 PE=1 SV=1	1.19098	0.252147	0.544328
G1SS70	21218.4	15597.9	16864.3	18299.7	16099.7	20823.9	40S ribosomal protein S3a OS=Oryctolagus cuniculus OX=9986 GN=RPS3A PE=1 SV=1	1.02874	0.040877	0.825244
G1SHU8	6630.9	4877.5	5262.6	5664.1	4893.5	6863.1	Uncharacterized protein OS=Oryctolagus cuniculus OX=9986 GN=RPL32 PE=4 SV=1	1.03874	0.0548332	0.795533
G1SZK4	2230.1	1640.8	1740.3	1724.8	2052	1234.7	PDGFA associated protein 1 OS=Oryctolagus cuniculus OX=9986 GN=PDAP1 PE=4 SV=1	0.893124	-0.163068	0.540748
U3KM58	2197.9	1617.6	1712.4	1641.8	1973.3	1332.8	Uncharacterized protein OS=Oryctolagus cuniculus OX=9986 GN=GK PE=3 SV=1	0.895078	-0.159915	0.495124
G1SYC9	11160.4	8215.4	9103	9740.7	10774.8	6026.4	RAB8B, member RAS oncogene family OS=Oryctolagus cuniculus OX=9986 GN=RAB8B PE=4 SV=2	0.931988	-0.101617	0.721091
G1SV62	1313.1	966.9	1275.8	1202.1	1092.2	866.6	Cell division cycle 16 OS=Oryctolagus cuniculus OX=9986 GN=CDC16 PE=4 SV=1	0.888942	-0.169839	0.422917
G1SF08	7093.9	5223.9	5147.6	5890.1	4789.2	6312.3	Uncharacterized protein OS=Oryctolagus cuniculus OX=9986 GN=RPL35A PE=1 SV=1	0.972872	-0.0396781	0.849759
G1TFZ6	3577.6	2634.7	2939.1	2818.3	3771.9	1942.9	Uncharacterized protein OS=Oryctolagus cuniculus OX=9986 PE=3 SV=1	0.932437	-0.100922	0.74722
U3KPI1	627.1	462.1	498.3	541.4	495.1	318.1	U3 small nucleolar ribonucleoprotein protein MPP10 OS=Oryctolagus cuniculus OX=9986 GN=MPHOSPH10 PE=3 SV=1	0.853291	-0.22889	0.410114
G1STJ3	1959.7	1445.2	1492.5	1504	1628.3	1086.5	Peptidyl-prolyl cis-trans isomerase E OS=Oryctolagus cuniculus OX=9986 GN=PPIE PE=3 SV=1	0.861437	-0.215183	0.384701
G1SIP2	14583	10755.1	12594.9	14393.4	12549.9	10139	Heterogeneous nuclear ribonucleoprotein L OS=Oryctolagus cuniculus OX=9986 GN=HNRNPL PE=4 SV=1	0.977574	-0.0327222	0.872274
G1T6G1	170.7	126.1	125.2	125.9	130.6	183.3	Methylmalonic aciduria (cobalamin deficiency) cblB type OS=Oryctolagus cuniculus OX=9986 GN=MMAB PE=4 SV=1	1.04218	0.0596045	0.81504
G1SY93	3531.6	2609.1	3190.3	2765.8	3572.6	1989.6	Rac family small GTPase 1 OS=Oryctolagus cuniculus OX=9986 GN=RAC1 PE=4 SV=1	0.892509	-0.164061	0.562716
G1TG24	252.2	186.4	183.2	186.3	300.2	341.1	Uncharacterized protein OS=Oryctolagus cuniculus OX=9986 PE=4 SV=1	1.33098	0.412483	0.253548
G1SXN0	1020.6	754.5	943	949.8	1030.2	1134.9	Pescadillo homolog OS=Oryctolagus cuniculus OX=9986 GN=PES1 PE=3 SV=1	1.14598	0.196587	0.238157
G1U9S6	2457.8	1817.1	2047	1750.8	2028.3	2087.9	Uncharacterized protein OS=Oryctolagus cuniculus OX=9986 GN=LOC100357230 PE=4 SV=1	0.928044	-0.107735	0.518176
G1SH28	2366.5	1749.6	1778.7	2669	2175	2182.6	P2X purinoceptor OS=Oryctolagus cuniculus OX=9986 GN=P2RX4 PE=3 SV=1	1.192	0.253384	0.218963
G1T5Q8	5441.5	4023.8	4534.4	5256.3	4938.3	3639.7	Syntaxin 12 OS=Oryctolagus cuniculus OX=9986 GN=STX12 PE=3 SV=1	0.988185	-0.0171469	0.936014
G1T6N7	690.1	510.3	498	547.2	551.6	333.1	Iron-sulfur cluster assembly 2 OS=Oryctolagus cuniculus OX=9986 GN=ISCA2 PE=4 SV=1	0.843088	-0.246245	0.403381
G1TU00	1316.6	973.7	1150	1293.2	1019.5	1051	Ribosomal protein L26 like 1 OS=Oryctolagus cuniculus OX=9986 GN=RPL26L1 PE=3 SV=2	0.977734	-0.0324861	0.855442
P27124	21298.3	15752.6	18036.8	14589.9	16877.8	11910.5	Peptidyl-prolyl cis-trans isomerase FKBP4 OS=Oryctolagus cuniculus OX=9986 GN=FKBP4 PE=1 SV=3	0.787439	-0.34476	0.144534
G1SLG0	1927.5	1425.7	1568.4	1409.3	1533.3	1014.7	Uncharacterized protein OS=Oryctolagus cuniculus OX=9986 GN=ANP32E PE=4 SV=1	0.804068	-0.314611	0.211238
G1TZ24	2126.2	1573.3	1579.8	1904.3	1800.4	1343.7	TYRO protein tyrosine kinase binding protein OS=Oryctolagus cuniculus OX=9986 GN=TYROBP PE=4 SV=2	0.956263	-0.0645206	0.774791
G1SPZ9	1795.6	1329.1	1518.2	1435.2	1739.2	1360.7	Uncharacterized protein OS=Oryctolagus cuniculus OX=9986 GN=PPA2 PE=4 SV=2	0.976782	-0.0338915	0.850029
G1SFH6	6813.3	5044.7	5795.2	4749.5	5544.6	3337.4	Ubiquitin like modifier activating enzyme 2 OS=Oryctolagus cuniculus OX=9986 GN=UBA2 PE=4 SV=2	0.772183	-0.372985	0.179144
G1SCD7	13070.1	9679.7	10847	8934.3	9987.9	6332	Uncharacterized protein OS=Oryctolagus cuniculus OX=9986 GN=LOC100356907 PE=4 SV=1	0.751685	-0.4118	0.132042
U3KP72	7971.2	5903.7	5676.9	6341.4	5304.4	4961.9	Uncharacterized protein OS=Oryctolagus cuniculus OX=9986 GN=APOBR PE=4 SV=1	0.849421	-0.235448	0.307317
G1SM62	6977.5	5172.8	6158.8	5568.8	5887.9	3708.6	Uncharacterized protein OS=Oryctolagus cuniculus OX=9986 GN=PAPSS1 PE=3 SV=2	0.828293	-0.271787	0.288382
G1TMW4	1315	975	1082.7	1023	1132	671.6	Kinesin family member 5A OS=Oryctolagus cuniculus OX=9986 GN=KIF5A PE=3 SV=1	0.838082	-0.254837	0.34796
G1TTQ5	1737.6	1288.4	1735.6	1620.8	1265.5	852.8	60S ribosomal protein L36 OS=Oryctolagus cuniculus OX=9986 GN=LOC100348796 PE=1 SV=1	0.785261	-0.348756	0.271629
G1SES2	4388	3255.3	3422.2	3076.3	3510.3	2798.9	N(alpha)-acetyltransferase 10, NatA catalytic subunit OS=Oryctolagus cuniculus OX=9986 GN=NAA10 PE=4 SV=1	0.848177	-0.237563	0.243041
G1T165	9808.5	7278.5	7539.5	9223.4	11760.9	9060.4	Sortilin-related receptor OS=Oryctolagus cuniculus OX=9986 GN=SORL1 PE=4 SV=1	1.22002	0.286899	0.202876
G1SRB6	11397.9	8459.2	9807.7	8179.6	9233.3	5095.2	Peptidylprolyl isomerase D OS=Oryctolagus cuniculus OX=9986 GN=PPID PE=4 SV=1	0.758748	-0.398307	0.187954
G1SL41	18687.3	13873	14702.1	15388	14493.3	15289.3	Beta-glucuronidase OS=Oryctolagus cuniculus OX=9986 GN=GUSB PE=3 SV=2	0.955741	-0.0653084	0.668795
G1TJ26	3805.9	2825.5	3256.9	2797.8	3186.1	1856.1	C-terminal Src kinase OS=Oryctolagus cuniculus OX=9986 GN=CSK PE=4 SV=2	0.792856	-0.334869	0.232922
G1TM55	12235	9084.2	10129.9	9752.6	8836.7	10959.6	40S ribosomal protein S6 OS=Oryctolagus cuniculus OX=9986 GN=RPS6 PE=1 SV=1	0.939579	-0.0899136	0.599387
G1SGY1	244.6	181.6	221.7	208.7	203	179.6	PAT1 homolog 1, processing body mRNA decay factor OS=Oryctolagus cuniculus OX=9986 GN=PATL1 PE=4 SV=1	0.912641	-0.131881	0.408458
G1U237	3286.5	2441.5	2730.4	2526.1	3637.5	1854.3	Uncharacterized protein OS=Oryctolagus cuniculus OX=9986 PE=4 SV=1	0.947922	-0.0771597	0.811373
G1T3Z0	137.1	101.8	141.3	129.3	131	153.3	Phosphatidylinositol-4,5-bisphosphate 3-kinase catalytic subunit gamma OS=Oryctolagus cuniculus OX=9986 GN=PIK3CG PE=3 SV=2	1.08785	0.121478	0.491543
G1U0B5	465.6	346	428.2	373	399.3	227.3	Protein phosphatase methylesterase 1 OS=Oryctolagus cuniculus OX=9986 GN=PPME1 PE=3 SV=1	0.806259	-0.310685	0.279754
G1SQS1	1178.9	876.1	799	705.3	979.7	373.9	Aldose 1-epimerase OS=Oryctolagus cuniculus OX=9986 GN=GALM PE=3 SV=1	0.721409	-0.471111	0.275569
G1TF11	151.5	112.6	124.1	113.2	124.7	92	Checkpoint kinase 2 OS=Oryctolagus cuniculus OX=9986 GN=CHEK2 PE=4 SV=1	0.84982	-0.234771	0.264696
G1TDI4	1599.8	1189.6	1218.2	1090.7	1187.9	818.5	Transthyretin OS=Oryctolagus cuniculus OX=9986 GN=TTR PE=3 SV=1	0.772807	-0.37182	0.153052
G1TUB8	7658.1	5695.7	6930.6	6878.2	6077.7	8622	Ribosomal protein L11 OS=Oryctolagus cuniculus OX=9986 GN=RPL11 PE=1 SV=2	1.06377	0.0891835	0.671745
G1T0R9	17492.6	13013.5	13383	11197.3	12543.3	10423.2	Glutathione S-transferase OS=Oryctolagus cuniculus OX=9986 GN=LOC100357917 PE=3 SV=1	0.778412	-0.361394	0.106794
U3KM64	7623.5	5672.5	5547.9	6901.2	6733.6	9211.5	Clathrin light chain OS=Oryctolagus cuniculus OX=9986 GN=CLTA PE=3 SV=1	1.2124	0.277863	0.270579
G1U1C0	1173.1	872.9	1042.5	983.5	992.8	893	RB binding protein 7, chromatin remodeling factor OS=Oryctolagus cuniculus OX=9986 GN=RBBP7 PE=4 SV=1	0.929027	-0.106208	0.473992
G1SV32	15512.8	11546.4	13695.4	13308.7	11946.9	23357.2	Uncharacterized protein OS=Oryctolagus cuniculus OX=9986 GN=RPL7 PE=1 SV=1	1.19282	0.254373	0.526071
G1SM52	15443.2	11495	12978.2	15669.5	15533	12572.1	Leucine rich repeat containing 59 OS=Oryctolagus cuniculus OX=9986 GN=LRRC59 PE=4 SV=1	1.09666	0.133112	0.448436
G1T0P2	826.6	615.4	572.9	676.2	709.8	732.6	Heparanase OS=Oryctolagus cuniculus OX=9986 GN=HPSE PE=4 SV=1	1.05147	0.0724036	0.688461
G1SGN6	375.9	279.9	371.6	466.5	332.9	287.4	Aspartylglucosaminidase OS=Oryctolagus cuniculus OX=9986 GN=AGA PE=4 SV=2	1.05782	0.0810887	0.766164
G1TX74	11334.5	8445.4	9231.1	8819.7	10733.3	5656.2	Twinfilin actin binding protein 2 OS=Oryctolagus cuniculus OX=9986 GN=TWF2 PE=4 SV=2	0.868953	-0.20265	0.500554
G1TCW2	5365.8	3999.3	4278.6	3915.2	5072.6	3516	Osteoclast stimulating factor 1 OS=Oryctolagus cuniculus OX=9986 GN=OSTF1 PE=4 SV=1	0.916452	-0.125869	0.576517
G1U411	7751.5	5777.6	6088.3	5572.6	5774.7	4149.3	Drebrin like OS=Oryctolagus cuniculus OX=9986 GN=DBNL PE=4 SV=1	0.789942	-0.340181	0.160378
G1SS06	771.3	575.2	573.5	526.9	564.6	371	Poly(A) binding protein interacting protein 2 OS=Oryctolagus cuniculus OX=9986 GN=PAIP2 PE=4 SV=1	0.761719	-0.392669	0.159739
G1TNM3	14713.1	10977.8	13260.3	13472.6	11822.3	12993.9	Ribosomal protein S3 OS=Oryctolagus cuniculus OX=9986 GN=RPS3 PE=1 SV=2	0.982994	-0.0247455	0.862118
G1TH59	5496.5	4102.1	4863.3	4720.6	4600.8	3481.7	Uncharacterized protein OS=Oryctolagus cuniculus OX=9986 GN=RBM39 PE=4 SV=1	0.885299	-0.175763	0.38243
G1T2F2	16867.5	12592.6	13798.6	14879.3	12900.8	26347.5	Peptidyl-prolyl cis-trans isomerase OS=Oryctolagus cuniculus OX=9986 GN=PPIB PE=3 SV=1	1.25125	0.323375	0.454682
G1TQJ4	2833.1	2115.3	2496.3	2242.1	2888	1750.3	AMP deaminase OS=Oryctolagus cuniculus OX=9986 GN=AMPD2 PE=3 SV=2	0.924201	-0.113721	0.654185
G1THE4	20516.3	15320.2	15942.3	18648.2	19681.2	15450.6	Protein kinase C OS=Oryctolagus cuniculus OX=9986 GN=PRKCB PE=3 SV=1	1.03865	0.0547082	0.763941
G1TDQ1	377	281.6	335.6	275.9	330.5	205.5	ILK associated serine/threonine phosphatase OS=Oryctolagus cuniculus OX=9986 GN=ILKAP PE=3 SV=1	0.816636	-0.292235	0.252786
O97860	2661.8	1988.9	2473.4	2766.2	2061.5	1467.1	Tartrate-resistant acid phosphatase type 5 OS=Oryctolagus cuniculus OX=9986 GN=ACP5 PE=2 SV=1	0.883592	-0.178548	0.551428
G1SGC0	5027	3757.1	4132.8	3731.4	4805.3	2961.1	Gasdermin D OS=Oryctolagus cuniculus OX=9986 GN=GSDMD PE=4 SV=1	0.890136	-0.167902	0.50959
G1SXB8	7777	5813.5	6718	7310.4	7177.9	7000.7	AP complex subunit beta OS=Oryctolagus cuniculus OX=9986 GN=AP1B1 PE=3 SV=2	1.05813	0.0815142	0.530973
G1SNC2	1446.5	1081.4	1164.7	1116.8	1332.3	1155.8	Uncharacterized protein OS=Oryctolagus cuniculus OX=9986 PE=4 SV=1	0.97625	-0.0346775	0.831619
G1TDB3	9133.1	6828.4	7310.1	7856.8	6529.9	13917.2	Uncharacterized protein OS=Oryctolagus cuniculus OX=9986 GN=RPS25 PE=1 SV=1	1.21624	0.28243	0.519747
U3KLY7	4270	3192.6	3491.9	3383.4	3302.4	2259.9	Uncharacterized protein OS=Oryctolagus cuniculus OX=9986 GN=ANP32B PE=4 SV=1	0.816623	-0.292258	0.23848
G1TBX7	4774	3569.6	3847	3975.3	5351.4	3017.4	Uncharacterized protein OS=Oryctolagus cuniculus OX=9986 GN=RALA PE=4 SV=1	1.01259	0.018053	0.950146
G1T000	2058.6	1539.4	1794.1	1841.9	1745	2413.7	C2CD2 like OS=Oryctolagus cuniculus OX=9986 GN=C2CD2L PE=4 SV=1	1.11285	0.154259	0.473955
G1TES1	168.4	126	142.5	123.3	144.2	205.5	DnaJ heat shock protein family (Hsp40) member C8 OS=Oryctolagus cuniculus OX=9986 GN=DNAJC8 PE=4 SV=1	1.08263	0.114538	0.685134
U3KMP5	585.1	437.9	517.2	433.6	467.3	233.3	Ubiquitin specific peptidase 10 OS=Oryctolagus cuniculus OX=9986 GN=USP10 PE=3 SV=1	0.736398	-0.441442	0.184579
G1SEG8	563.5	422	510.8	527.1	534.3	645.6	Mitogen-activated protein kinase kinase kinase kinase 1 OS=Oryctolagus cuniculus OX=9986 GN=MAP4K1 PE=4 SV=1	1.14081	0.190064	0.280673
G1SVF9	2510.3	1880.2	2267.3	2112.1	2500.2	1581.2	tRNA nucleotidyl transferase 1 OS=Oryctolagus cuniculus OX=9986 GN=TRNT1 PE=3 SV=2	0.930262	-0.104291	0.657266
G1SR83	1164.2	872.2	958.2	1180.3	1240.5	743.3	DnaJ heat shock protein family (Hsp40) member B14 OS=Oryctolagus cuniculus OX=9986 GN=DNAJB14 PE=4 SV=1	1.0566	0.079432	0.768087
G1TBW1	780.7	585.1	648.7	631.9	730.3	450.3	Thioredoxin domain containing 17 OS=Oryctolagus cuniculus OX=9986 GN=TXNDC17 PE=4 SV=1	0.899727	-0.152441	0.538482
G1SS57	5553.4	4162.4	6070.3	3185.5	3313.4	2562.4	Scinderin OS=Oryctolagus cuniculus OX=9986 GN=SCIN PE=4 SV=2	0.574005	-0.800865	0.021884
P35566	1265.7	949	935.5	937	1002.8	904.5	MARCKS-related protein OS=Oryctolagus cuniculus OX=9986 GN=MARCKSL1 PE=1 SV=2	0.902895	-0.14737	0.412938
G1SZ63	9202.7	6900.4	8519	8649.8	7621.2	5522.8	Aldehyde dehydrogenase 9 family member A1 OS=Oryctolagus cuniculus OX=9986 GN=ALDH9A1 PE=3 SV=2	0.885132	-0.176035	0.456807
G1SY53	5586.2	4188.7	4557	4477.7	3447.4	7630.1	Uncharacterized protein OS=Oryctolagus cuniculus OX=9986 GN=LOC100351807 PE=1 SV=1	1.08536	0.118167	0.773773
G1SM15	17182.8	12889.3	14978.5	15552.4	14632.7	11169.2	Uncharacterized protein OS=Oryctolagus cuniculus OX=9986 GN=AP2M1 PE=3 SV=1	0.917952	-0.123509	0.535838
G1TK17	8942.4	6710.3	8191.2	8218.1	7086.8	8662.7	40S ribosomal protein S4 OS=Oryctolagus cuniculus OX=9986 GN=LOC100338112 PE=1 SV=1	1.00519	0.00746535	0.961664
G1T7S2	117.1	87.9	125.5	112.8	108.4	195.9	MutS homolog 6 OS=Oryctolagus cuniculus OX=9986 GN=MSH6 PE=3 SV=1	1.26203	0.335743	0.399721
G1SK91	1206.4	905.7	1018.7	886.1	1023.8	1653.1	Ubiquitin conjugating enzyme E2 Q1 OS=Oryctolagus cuniculus OX=9986 GN=UBE2Q1 PE=4 SV=1	1.13805	0.186561	0.597909
G1U2Q6	436.1	327.7	702.1	301	1123.6	384.5	Smoothelin OS=Oryctolagus cuniculus OX=9986 GN=SMTN PE=4 SV=1	1.23412	0.303485	0.707757
G1U4D5	606.2	455.6	523.9	563.5	522.7	737.5	Translation machinery associated 16 homolog OS=Oryctolagus cuniculus OX=9986 GN=TMA16 PE=4 SV=2	1.15009	0.201748	0.371826
G1TDH4	5041	3790.1	4431.2	4528.7	5117	5917.8	Uncharacterized protein OS=Oryctolagus cuniculus OX=9986 GN=PRDX3 PE=4 SV=1	1.17351	0.230835	0.229073
G1TTE0	10272.8	7725.2	8758.7	9831.9	9170.5	11970	Colony stimulating factor 1 receptor OS=Oryctolagus cuniculus OX=9986 GN=CSF1R PE=3 SV=1	1.15756	0.211083	0.278976
G1TKE7	28706	21594.4	27816.9	24232.5	23796	18911.4	IQ motif containing GTPase activating protein 2 OS=Oryctolagus cuniculus OX=9986 GN=IQGAP2 PE=4 SV=1	0.856915	-0.222776	0.255967
G1SJE3	382.6	287.8	309.3	245.5	281.1	242.6	Flap endonuclease 1 OS=Oryctolagus cuniculus OX=9986 GN=FEN1 PE=3 SV=1	0.785138	-0.348982	0.088112
G1U2E0	2358	1774.6	1788.4	1809.3	2105.5	2059.7	Peptidyl arginine deiminase 4 OS=Oryctolagus cuniculus OX=9986 GN=PADI4 PE=4 SV=1	1.00904	0.0129776	0.937332
G1TVT6	9021.1	6789.7	8259.2	8262.8	7206.5	14078.4	Uncharacterized protein OS=Oryctolagus cuniculus OX=9986 GN=LOC108175352 PE=1 SV=1	1.22757	0.29581	0.459735
G1SSY6	1690.6	1272.5	1529.6	1540.7	1670.9	933	Oligophrenin 1 OS=Oryctolagus cuniculus OX=9986 GN=OPHN1 PE=4 SV=2	0.922519	-0.116349	0.67612
Q28618	8422.5	6341.3	6859.1	7373.5	6830.1	16249.1	Nuclease-sensitive element-binding protein 1 OS=Oryctolagus cuniculus OX=9986 GN=YBX1 PE=1 SV=3	1.40835	0.49401	0.398441
G1SW89	2252.6	1696.3	1798.3	2099.2	2227	1488.9	Lunapark, ER junction formation factor OS=Oryctolagus cuniculus OX=9986 GN=LNPK PE=4 SV=1	1.01181	0.0169441	0.940472
G1T089	2004	1509.1	1640.8	1479.1	1643.4	1242.1	THUMP domain containing 3 OS=Oryctolagus cuniculus OX=9986 GN=THUMPD3 PE=4 SV=1	0.846854	-0.239815	0.234917
G1SH39	377.8	284.6	304.3	281	265.1	147.8	Minichromosome maintenance complex binding protein OS=Oryctolagus cuniculus OX=9986 GN=MCMBP PE=4 SV=2	0.717803	-0.47834	0.147213
G1TJY2	9771	7359.6	8260.7	9482.9	7941.6	7812.4	Chitinase domain containing 1 OS=Oryctolagus cuniculus OX=9986 GN=CHID1 PE=4 SV=1	0.993919	-0.00879981	0.956404
B7NZC7	1562	1176.5	1331.8	1118.3	1327.2	938.2	Tumor necrosis factor alpha-induced protein 8-like protein 2 OS=Oryctolagus cuniculus OX=9986 GN=TNFAIP8L2 PE=3 SV=1	0.831315	-0.266533	0.22263
G1T4Y7	802.6	604.8	666.3	605.4	689.9	649.3	Programmed cell death 5 OS=Oryctolagus cuniculus OX=9986 GN=PDCD5 PE=4 SV=1	0.937744	-0.092734	0.534126
G1TKN7	5623.5	4238.7	4856.1	5551.3	5156.9	4964.5	Enhancer of rudimentary homolog OS=Oryctolagus cuniculus OX=9986 GN=LOC100352197 PE=3 SV=1	1.06484	0.0906421	0.506199
G1SL38	3955.3	2981.8	3207.3	3190.9	3873.9	2031.6	Twinfilin actin binding protein 1 OS=Oryctolagus cuniculus OX=9986 GN=TWF1 PE=4 SV=1	0.896692	-0.157316	0.599211
G1SJ07	381.7	287.8	322.8	306.8	282.8	375.2	Cell proliferation regulating inhibitor of protein phosphatase 2A OS=Oryctolagus cuniculus OX=9986 GN=CIP2A PE=4 SV=1	0.972287	-0.0405459	0.825486
G1SIT5	11927.6	8996.7	9679.4	10453.1	7821.8	16557	Uncharacterized protein OS=Oryctolagus cuniculus OX=9986 GN=RPL35 PE=1 SV=1	1.13816	0.186703	0.633442
G1TQR2	12263	9251.4	10387.5	10052.3	11994.3	7574.3	Uncharacterized protein OS=Oryctolagus cuniculus OX=9986 GN=EEF1B2 PE=3 SV=1	0.9285	-0.107026	0.649744
G1SM72	113.1	85.4	87.5	100	100.3	68.9	Kin17 DNA and RNA binding protein OS=Oryctolagus cuniculus OX=9986 GN=KIN PE=4 SV=1	0.941259	-0.0873363	0.703732
G1T2N1	824.4	622.1	710.1	712.9	891	398.2	Antioxidant 1 copper chaperone OS=Oryctolagus cuniculus OX=9986 GN=ATOX1 PE=4 SV=1	0.928359	-0.107245	0.757151
G1SVV6	3622.6	2733.9	2930.4	2499.9	2997.3	1535.4	Dual-specificity mitogen-activated protein kinase kinase 1 OS=Oryctolagus cuniculus OX=9986 GN=MAP2K1 PE=3 SV=1	0.75726	-0.401139	0.21226
G1SRF9	679.9	513.2	601.1	548.9	593.3	488.6	Golgi associated, gamma adaptin ear containing, ARF binding protein 3 OS=Oryctolagus cuniculus OX=9986 GN=GGA3 PE=4 SV=1	0.908929	-0.13776	0.392719
G1TEI7	771.3	582.2	677	700.6	748.2	462.8	Platelet activating factor receptor OS=Oryctolagus cuniculus OX=9986 GN=PTAFR PE=3 SV=2	0.941443	-0.0870543	0.721987
G1TQD4	5949.8	4492.3	4939.8	5581.8	4091.1	3106.9	RALY heterogeneous nuclear ribonucleoprotein OS=Oryctolagus cuniculus OX=9986 GN=RALY PE=4 SV=2	0.830834	-0.267368	0.359461
G1SMW8	4138	3124.7	3365	3889.6	3824.5	3909.8	CUGBP Elav-like family member 2 OS=Oryctolagus cuniculus OX=9986 GN=CELF2 PE=4 SV=1	1.09374	0.129265	0.339944
G1TA23	626.5	473.2	606	519.8	709.4	545.6	CD180 molecule OS=Oryctolagus cuniculus OX=9986 GN=CD180 PE=4 SV=1	1.04051	0.0572922	0.778004
G1THG4	3309.5	2501.2	2976	3140.4	2912.3	1911.1	Family with sequence similarity 98 member B OS=Oryctolagus cuniculus OX=9986 GN=FAM98B PE=4 SV=1	0.906347	-0.141865	0.570521
G1SGL3	549.6	415.5	474.4	485	494.2	408.5	Uncharacterized protein OS=Oryctolagus cuniculus OX=9986 GN=SRSF11 PE=4 SV=1	0.964015	-0.0528725	0.733926
G1SQM7	1311.6	991.6	1225.3	971.8	1242.7	637.3	SUB1 homolog, transcriptional regulator OS=Oryctolagus cuniculus OX=9986 GN=SUB1 PE=4 SV=2	0.808219	-0.307182	0.321352
G1U1W8	4360.2	3298.2	3806.4	3467.4	4313.8	8375.2	Uncharacterized protein OS=Oryctolagus cuniculus OX=9986 PE=4 SV=1	1.40922	0.494895	0.368811
G1TC48	4266.2	3227.4	3843.9	4111.3	3892.3	2727.4	Heterogeneous nuclear ribonucleoprotein U like 1 OS=Oryctolagus cuniculus OX=9986 GN=HNRNPUL1 PE=4 SV=1	0.946505	-0.079318	0.719683
G1SIY2	26.9	20.4	33.1	33.8	26.9	26	Ring finger protein 115 OS=Oryctolagus cuniculus OX=9986 GN=RNF115 PE=4 SV=1	1.07836	0.108836	0.659303
G1T3Q2	1123.7	851	890.7	1038.8	925.8	970.3	DDRGK domain containing 1 OS=Oryctolagus cuniculus OX=9986 GN=DDRGK1 PE=4 SV=2	1.02425	0.0345749	0.811977
G1SJC7	1975.9	1496.6	1713.7	1526	1657.3	869.1	G3BP stress granule assembly factor 2 OS=Oryctolagus cuniculus OX=9986 GN=G3BP2 PE=4 SV=1	0.781381	-0.355902	0.249041
G1TFZ7	2116.5	1603.2	1835.8	1554.9	1999	1119.8	Protein phosphatase, Mg2+/Mn2+ dependent 1G OS=Oryctolagus cuniculus OX=9986 GN=PPM1G PE=3 SV=1	0.841274	-0.249352	0.374006
G1TWC5	391.7	296.7	278.9	286.7	326.7	231.5	U6 snRNA-associated Sm-like protein LSm3 OS=Oryctolagus cuniculus OX=9986 GN=LOC100345430 PE=3 SV=1	0.873462	-0.195183	0.411881
G1SVH8	3449.7	2613.7	3273.9	3394.7	3033.5	2262.8	RAB31, member RAS oncogene family OS=Oryctolagus cuniculus OX=9986 GN=RAB31 PE=4 SV=1	0.930783	-0.103483	0.634823
G1SVR6	299.1	226.7	292.7	282.5	305.2	258.6	Uncharacterized protein OS=Oryctolagus cuniculus OX=9986 PE=4 SV=2	1.03397	0.0481874	0.74664
G1SYQ9	2035.8	1543.2	1795	1475.6	1603.6	1162.3	RalA binding protein 1 OS=Oryctolagus cuniculus OX=9986 GN=RALBP1 PE=4 SV=2	0.789263	-0.341422	0.122701
G1SFL5	3136.7	2378.5	2572.5	2413.3	2468.2	1346.4	RAN binding protein 3 OS=Oryctolagus cuniculus OX=9986 GN=RANBP3 PE=4 SV=2	0.770046	-0.376983	0.222972
G1SP34	25397.5	19268.4	21533.7	18044.2	23462.6	22765.5	Arp2/3 complex 34 kDa subunit OS=Oryctolagus cuniculus OX=9986 GN=ARPC2 PE=3 SV=1	0.970887	-0.0426247	0.807584
G1TIX5	621.3	471.5	507.3	559.6	639.1	354.6	Embryonic ectoderm development OS=Oryctolagus cuniculus OX=9986 GN=EED PE=4 SV=2	0.970752	-0.0428253	0.878832
G1T277	7230.2	5487.8	6281.8	5203.7	7464.7	7850.5	Actin-related protein 2/3 complex subunit 3 OS=Oryctolagus cuniculus OX=9986 GN=ARPC3 PE=3 SV=1	1.07995	0.110969	0.628203
G1T6B3	8645	6562.8	6842.2	5756.1	7029.3	3658.1	Serine/threonine kinase receptor associated protein OS=Oryctolagus cuniculus OX=9986 GN=STRAP PE=4 SV=2	0.745737	-0.423261	0.188338
G1SJ57	2117	1607.2	1621.4	1374.2	1762.2	1500.7	SBDS, ribosome maturation factor OS=Oryctolagus cuniculus OX=9986 GN=SBDS PE=4 SV=1	0.867461	-0.205129	0.309026
G1SYA5	9803.6	7443.5	8333.4	6719.7	8301.3	5599.7	S-formylglutathione hydrolase OS=Oryctolagus cuniculus OX=9986 GN=ESD PE=3 SV=1	0.80611	-0.310951	0.188092
G1SCW7	2583.9	1963.4	2407.7	2512.4	2431.9	1894.4	Uncharacterized protein OS=Oryctolagus cuniculus OX=9986 GN=ABCF2 PE=4 SV=2	0.983278	-0.0243287	0.891896
G1SMG0	1207.7	917.7	1108.8	1074.6	996.1	709.1	Ribosomal L1 domain containing 1 OS=Oryctolagus cuniculus OX=9986 GN=RSL1D1 PE=4 SV=2	0.859502	-0.218427	0.339992
G1U642	2886.1	2193.5	2439.4	2660.7	2469.9	3945.1	RNA helicase OS=Oryctolagus cuniculus OX=9986 GN=DDX18 PE=3 SV=1	1.20704	0.271469	0.362785
G1TZR2	1676.6	1274.6	1439.5	1945.5	1785.2	2179.4	Chromosome 18 open reading frame 32 OS=Oryctolagus cuniculus OX=9986 GN=C18orf32 PE=4 SV=1	1.34605	0.428732	0.036262
G1SPL3	365.3	277.8	284.6	337	389.1	162.1	Family with sequence similarity 177 member A1 OS=Oryctolagus cuniculus OX=9986 GN=FAM177A1 PE=4 SV=1	0.957422	-0.0627731	0.867745
G1SRL3	4977.7	3785.3	4579.5	3975.8	5076.7	3228	Glycylpeptide N-tetradecanoyltransferase OS=Oryctolagus cuniculus OX=9986 GN=NMT1 PE=3 SV=2	0.920405	-0.119659	0.61027
G1T840	13490.1	10262.1	12709.2	10372.3	11051.6	7607.4	Heat shock protein family H (Hsp110) member 1 OS=Oryctolagus cuniculus OX=9986 GN=HSPH1 PE=3 SV=1	0.79622	-0.328761	0.159096
G1SQ38	266.3	202.6	245.5	201	234.3	93.1	Dynamin 3 OS=Oryctolagus cuniculus OX=9986 GN=DNM3 PE=3 SV=2	0.739642	-0.435101	0.253795
G1TWC9	109.3	83.2	94.9	98.2	94.9	87	FAD synthase OS=Oryctolagus cuniculus OX=9986 GN=FLAD1 PE=3 SV=1	0.9746	-0.0371179	0.782628
G1SP54	10324.5	7856.5	9322.9	7367.9	10133.7	5692.3	Leukotriene A(4) hydrolase OS=Oryctolagus cuniculus OX=9986 GN=LTA4H PE=3 SV=1	0.843295	-0.245891	0.38666
G1TTL1	7389.5	5623.1	6358.5	5937.4	6800.4	4815.3	N(alpha)-acetyltransferase 15, NatA auxiliary subunit OS=Oryctolagus cuniculus OX=9986 GN=NAA15 PE=4 SV=1	0.906149	-0.14218	0.475213
G1TM35	1837.4	1399	1627.8	1646.3	1770.9	1122.7	Fission, mitochondrial 1 OS=Oryctolagus cuniculus OX=9986 GN=FIS1 PE=4 SV=2	0.933329	-0.0995424	0.670059
G1SER4	1979.8	1508	1648.5	1427	1772.5	1248.8	Uncharacterized protein OS=Oryctolagus cuniculus OX=9986 GN=CASP1 PE=3 SV=2	0.866051	-0.207476	0.331744
G1U976	1264.8	963.4	1020.8	1040	1270.6	898.3	Uncharacterized protein OS=Oryctolagus cuniculus OX=9986 GN=LOC100344629 PE=4 SV=1	0.987658	-0.0179165	0.92978
G1SWV6	216	164.5	181.3	167.6	231.4	120.1	Argininosuccinate lyase OS=Oryctolagus cuniculus OX=9986 GN=ASL PE=3 SV=2	0.923994	-0.114045	0.709966
G1SV22	3835.3	2922.6	2982.7	2672.3	3459.7	1771.3	Phosphatidylethanolamine-binding protein 1 OS=Oryctolagus cuniculus OX=9986 GN=PEBP1 PE=4 SV=1	0.811377	-0.301556	0.343039
G1T1X7	991.9	755.9	881.6	880.4	862.9	535.9	Regulation of nuclear pre-mRNA domain containing 2 OS=Oryctolagus cuniculus OX=9986 GN=RPRD2 PE=4 SV=1	0.866814	-0.206206	0.423703
G1TJW1	9965.7	7595	8600.3	8340.9	7300.9	10984.4	40S ribosomal protein S8 OS=Oryctolagus cuniculus OX=9986 GN=LOC100352057 PE=1 SV=1	1.01778	0.0254286	0.910381
P10160	6424.7	4896.4	4809.6	4575.1	5716.8	5682.7	Eukaryotic translation initiation factor 5A-1 OS=Oryctolagus cuniculus OX=9986 GN=EIF5A PE=1 SV=2	0.990323	-0.0140289	0.939557
G1SG59	2616	1993.7	2115.8	1776.4	2360.2	1262.7	MOB kinase activator 1B OS=Oryctolagus cuniculus OX=9986 GN=MOB1B PE=4 SV=2	0.80281	-0.31687	0.297951
G1SR20	2720.2	2073.4	2303.1	1888.2	2110.7	2912.4	Galactokinase 2 OS=Oryctolagus cuniculus OX=9986 GN=GALK2 PE=4 SV=1	0.973875	-0.0381915	0.87346
G1TRP6	2997	2285.5	2462.5	2501.8	2565.7	2220.5	Uncharacterized protein OS=Oryctolagus cuniculus OX=9986 PE=4 SV=1	0.940994	-0.0877426	0.558068
G1U2A1	9685.9	7386.8	8410.1	8203.9	7595.4	8642.8	Uncharacterized protein OS=Oryctolagus cuniculus OX=9986 PE=4 SV=1	0.959161	-0.0601551	0.659885
G1SDQ9	144.3	110.1	126.3	114.7	124.8	206.8	DLG associated protein 4 OS=Oryctolagus cuniculus OX=9986 GN=DLGAP4 PE=4 SV=1	1.17231	0.229359	0.5168
G1TLW3	7069.2	5391.9	6494.2	7245.7	6805.7	6114.8	DEAD-box helicase 5 OS=Oryctolagus cuniculus OX=9986 GN=DDX5 PE=3 SV=2	1.06388	0.0893381	0.532807
G1T6Q3	546.8	417.1	470.4	440.3	449.1	685.2	alpha-1,2-Mannosidase OS=Oryctolagus cuniculus OX=9986 GN=EDEM1 PE=3 SV=1	1.09782	0.134639	0.625531
G1TYE2	465.9	355.5	360.1	370.8	341.9	196.6	Latexin OS=Oryctolagus cuniculus OX=9986 GN=LXN PE=4 SV=1	0.769615	-0.377791	0.234334
G1SQU0	4941.3	3770.5	4249	4408	4694.3	3769.6	N-acetylglucosamine-6-sulfatase OS=Oryctolagus cuniculus OX=9986 GN=GNS PE=3 SV=1	0.993141	-0.00992954	0.949088
G1SG64	2703.7	2063.1	1833.3	1593.1	3982.3	1997.6	Arginase OS=Oryctolagus cuniculus OX=9986 GN=ARG1 PE=3 SV=2	1.14741	0.198377	0.699942
G1T2Q0	982.3	749.6	864.4	867	952.5	771.1	MCL1, BCL2 family apoptosis regulator OS=Oryctolagus cuniculus OX=9986 GN=MCL1 PE=4 SV=1	0.997805	-0.0031702	0.983275
G1TMU2	11373	8680.6	9454.8	10104.5	9956.3	13877	Uncharacterized protein OS=Oryctolagus cuniculus OX=9986 GN=HNRNPF PE=4 SV=1	1.15011	0.201767	0.384125
G1TVT0	30319.1	23148	24949	27774	28169.3	31559	Nucleolin OS=Oryctolagus cuniculus OX=9986 GN=NCL PE=4 SV=1	1.11587	0.158172	0.286733
G1TGX6	11449.6	8742.7	9928	10432.9	10767.5	8123.7	Erythrocyte membrane protein band 4.1 like 3 OS=Oryctolagus cuniculus OX=9986 GN=EPB41L3 PE=4 SV=2	0.973566	-0.0386493	0.827658
G1T5I9	2581.2	1971	2134.6	2137.9	2064.5	1642.7	Cleavage and polyadenylation specific factor 6 OS=Oryctolagus cuniculus OX=9986 GN=CPSF6 PE=4 SV=1	0.874125	-0.194088	0.305328
G1TER4	1901.4	1453.1	1612.6	1856.5	1772.1	1466.2	Uncharacterized protein OS=Oryctolagus cuniculus OX=9986 GN=ABCD1 PE=4 SV=1	1.02571	0.0366215	0.821608
G1SFV1	51462	39328.6	44295.1	47771.9	42949.3	64709.2	Protein disulfide-isomerase OS=Oryctolagus cuniculus OX=9986 GN=PDIA4 PE=3 SV=1	1.15061	0.202394	0.415831
G1SW46	3440.9	2630.4	3216.9	2777.5	2765.9	2032.4	Ribonuclease H2 subunit B OS=Oryctolagus cuniculus OX=9986 GN=RNASEH2B PE=4 SV=2	0.815637	-0.294001	0.173523
G1TFI4	1533.9	1172.8	1287.6	1251.1	1373.1	885.6	Transcription factor BTF3 OS=Oryctolagus cuniculus OX=9986 GN=BTF3L4 PE=3 SV=1	0.878702	-0.186554	0.422918
G1SKS0	3850.2	2943.8	3533.2	3140.5	4046.3	1970.7	Actin-related protein 2/3 complex subunit OS=Oryctolagus cuniculus OX=9986 GN=ARPC1A PE=3 SV=1	0.886736	-0.173423	0.584733
G1SP29	828.8	634	629.4	779	701.8	503	Retinoid X receptor gamma OS=Oryctolagus cuniculus OX=9986 GN=RXRG PE=3 SV=1	0.948189	-0.0767534	0.748644
G1TEZ4	4032.6	3085.4	3451.2	2816.1	3256.3	2679.5	Nuclear distribution C, dynein complex regulator OS=Oryctolagus cuniculus OX=9986 GN=NUDC PE=4 SV=1	0.828057	-0.272198	0.13678
G1TAX7	10097.9	7727.4	9334.2	8608.5	8908.8	8886.5	Rac family small GTPase 2 OS=Oryctolagus cuniculus OX=9986 GN=RAC2 PE=4 SV=1	0.972175	-0.0407121	0.738998
G1TMM7	3437.5	2632.8	2722.5	2624.1	2706.8	3329.1	Uncharacterized protein OS=Oryctolagus cuniculus OX=9986 GN=ANP32A PE=4 SV=2	0.984897	-0.0219552	0.902161
G1T545	4025.8	3084	2891.2	2424.2	3147.7	1244	Lactoylglutathione lyase OS=Oryctolagus cuniculus OX=9986 GN=BTBD9 PE=3 SV=1	0.681522	-0.553168	0.181007
G1TB18	8647.5	6624.6	7255.2	6670.9	7696.3	6394.3	Rho GTPase activating protein 1 OS=Oryctolagus cuniculus OX=9986 GN=ARHGAP1 PE=4 SV=2	0.921615	-0.117764	0.457749
G1SYU2	1411.1	1081.1	1273.5	1090.1	1247.2	567.3	Uncharacterized protein OS=Oryctolagus cuniculus OX=9986 GN=DNAJC2 PE=4 SV=1	0.771331	-0.374578	0.27419
G1SWK4	303.6	232.7	267.4	299	300.6	96.8	Derlin OS=Oryctolagus cuniculus OX=9986 GN=DERL1 PE=3 SV=2	0.866492	-0.206742	0.639521
G1U7K9	20472.2	15690.7	18045.7	16796	19198.7	23130.5	Uncharacterized protein OS=Oryctolagus cuniculus OX=9986 PE=4 SV=1	1.0907	0.125252	0.516386
G1U5M7	3834.2	2939	3058.4	3707.1	3632.4	2830.2	Uncharacterized protein OS=Oryctolagus cuniculus OX=9986 GN=SNU13 PE=4 SV=1	1.03439	0.0487788	0.790541
G1STI3	6083.9	4663.4	5395.7	5380.6	5085.7	4032.3	KH RNA binding domain containing, signal transduction associated 1 OS=Oryctolagus cuniculus OX=9986 GN=KHDRBS1 PE=4 SV=1	0.898135	-0.154996	0.397683
G1T4R9	14912	11431.5	13281.2	12035.1	13391.1	8824.6	1-phosphatidylinositol 4,5-bisphosphate phosphodiesterase gamma OS=Oryctolagus cuniculus OX=9986 GN=PLCG2 PE=4 SV=2	0.86438	-0.210262	0.34803
G1TE69	9794.9	7509.2	9069.7	8450.3	8802.6	9828.6	Uncharacterized protein OS=Oryctolagus cuniculus OX=9986 GN=SRSF1 PE=4 SV=2	1.02683	0.0382016	0.780375
G1TTD6	4246.2	3255.7	4032.4	3892.9	3291.2	3397.6	40S ribosomal protein S4 OS=Oryctolagus cuniculus OX=9986 GN=LOC100355379 PE=3 SV=1	0.917412	-0.124358	0.419777
G1SMS3	15104.3	11582.1	12860.2	10785.1	13947.9	11771.9	ARP2 actin related protein 2 homolog OS=Oryctolagus cuniculus OX=9986 GN=ACTR2 PE=3 SV=1	0.923086	-0.115463	0.506215
G1SXF7	2376.7	1822.6	2053.3	1923.3	1927.6	1644.3	AP2 associated kinase 1 OS=Oryctolagus cuniculus OX=9986 GN=AAK1 PE=4 SV=2	0.878866	-0.186285	0.246276
G1SRL4	4792.1	3675.3	3554.5	4519	4027	2563.7	Alpha-galactosidase OS=Oryctolagus cuniculus OX=9986 GN=NAGA PE=3 SV=1	0.924122	-0.113845	0.689338
G1TT48	1278.2	980.3	1067.5	1359.7	1385.8	2649.5	Uncharacterized protein OS=Oryctolagus cuniculus OX=9986 GN=OSTC PE=4 SV=2	1.62207	0.697835	0.187836
G1TC70	1396.8	1071.3	1342.6	1067.3	1270.7	849.4	Protein phosphatase 1 regulatory subunit 12A OS=Oryctolagus cuniculus OX=9986 GN=PPP1R12A PE=4 SV=2	0.836434	-0.257676	0.258606
G1THW3	3936.2	3019.7	3302.9	4044.5	3554.7	2656.5	Integral membrane protein 2B OS=Oryctolagus cuniculus OX=9986 GN=ITM2B PE=4 SV=1	0.999698	-0.00043576	0.998413
G1TR12	5777.4	4432.5	4710.5	4517.5	5193.7	4039.2	Inositol polyphosphate-5-phosphatase D OS=Oryctolagus cuniculus OX=9986 GN=INPP5D PE=4 SV=2	0.921584	-0.117812	0.502125
G1SEK1	9302	7136.7	7930.7	7078.7	7987.2	6147.8	Serine/threonine-protein phosphatase OS=Oryctolagus cuniculus OX=9986 GN=PPP1CB PE=3 SV=2	0.870506	-0.200074	0.271714
G1SV99	5203.7	3992.7	5920.5	4492.8	4821.5	2571	Testin OS=Oryctolagus cuniculus OX=9986 GN=TES PE=4 SV=1	0.786226	-0.346984	0.297189
Q29502	9770.6	7497.1	8204.4	6710.9	7962.6	3969.4	Serine/threonine-protein kinase PAK 2 OS=Oryctolagus cuniculus OX=9986 GN=PAK2 PE=2 SV=1	0.731895	-0.450291	0.168765
G1SGJ7	981.4	753.3	788.1	652.7	866.8	723.3	Phosphotriesterase related OS=Oryctolagus cuniculus OX=9986 GN=PTER PE=3 SV=1	0.889012	-0.169725	0.380932
G1TYC1	5730.1	4398.4	4483.1	5438.7	5220.2	5706.3	RAB32, member RAS oncogene family OS=Oryctolagus cuniculus OX=9986 GN=RAB32 PE=4 SV=1	1.12001	0.163517	0.266326
G1T5G8	329.3	252.8	328.8	369.8	335.6	265.5	Transmembrane protein 165 OS=Oryctolagus cuniculus OX=9986 GN=TMEM165 PE=4 SV=2	1.06587	0.0920301	0.642153
G1SW69	456.1	350.1	372.4	384.6	409	284.8	STARD3 N-terminal like OS=Oryctolagus cuniculus OX=9986 GN=STARD3NL PE=4 SV=1	0.914984	-0.128182	0.539501
G1SNV4	6515.9	5002.8	5578.1	6658	6211	4846.7	Splicing factor 3a subunit 3 OS=Oryctolagus cuniculus OX=9986 GN=SF3A3 PE=4 SV=1	1.0362	0.0513025	0.783134
U3KPB0	232.4	178.5	223	175.6	212.3	198.6	Histone acetyltransferase type B catalytic subunit OS=Oryctolagus cuniculus OX=9986 GN=HAT1 PE=3 SV=1	0.925225	-0.112124	0.469006
G1SNT1	9924	7621.8	7517.4	7868.4	8164.9	4659.7	Eukaryotic translation initiation factor 3 subunit J OS=Oryctolagus cuniculus OX=9986 GN=EIF3J PE=3 SV=1	0.825633	-0.276427	0.347502
G1U5B3	15519.5	11920.2	13903.9	15479.9	15460	19373.6	Prosaposin OS=Oryctolagus cuniculus OX=9986 GN=PSAP PE=4 SV=2	1.21696	0.283282	0.147198
G1TVH9	13557.1	10413.4	11157.7	9401.9	11559.3	8675.9	Actin-related protein 2/3 complex subunit OS=Oryctolagus cuniculus OX=9986 GN=ARPC1B PE=3 SV=1	0.843684	-0.245225	0.227231
G1SQ03	1306.6	1003.6	1013.4	1117.6	1147.4	594.5	Solute carrier family 44 member 1 OS=Oryctolagus cuniculus OX=9986 GN=SLC44A1 PE=3 SV=2	0.860362	-0.216984	0.492903
G1T045	2653.2	2038.3	2187.7	1620.6	2125.4	1053.7	TNF alpha induced protein 8 OS=Oryctolagus cuniculus OX=9986 GN=TNFAIP8 PE=4 SV=1	0.697712	-0.519296	0.127017
G1TKL6	2374.1	1824	1620.6	1762.5	2261.6	2028.6	Syntaxin 11 OS=Oryctolagus cuniculus OX=9986 GN=STX11 PE=3 SV=1	1.04021	0.0568817	0.784931
G1SMK5	2528.5	1942.7	2198.8	1685.5	2126.9	1437.5	Cbl proto-oncogene OS=Oryctolagus cuniculus OX=9986 GN=CBL PE=4 SV=1	0.787091	-0.345398	0.146754
G1T5A0	5664.1	4352.3	4675.2	3844.5	4727.9	3349.6	Ribonucleoside-diphosphate reductase OS=Oryctolagus cuniculus OX=9986 GN=RRM1 PE=3 SV=1	0.811484	-0.301365	0.177066
G1SRV8	342.7	263.3	357.6	312.7	262.4	200.4	Uncharacterized protein OS=Oryctolagus cuniculus OX=9986 PE=4 SV=1	0.804795	-0.313307	0.224834
P15253	58023.8	44591.6	49416	55629.1	51550.6	124240	Calreticulin OS=Oryctolagus cuniculus OX=9986 GN=CALR PE=1 SV=1	1.52218	0.606139	0.330374
G1SSL2	812.7	625	605.6	694	722	588.9	Uncharacterized protein OS=Oryctolagus cuniculus OX=9986 GN=CNPY2 PE=4 SV=1	0.981207	-0.0273706	0.876789
G1SKX7	1442.1	1109.8	1489.4	1473.7	1517.7	1458.4	TRAF3 interacting protein 3 OS=Oryctolagus cuniculus OX=9986 GN=TRAF3IP3 PE=4 SV=1	1.10108	0.138921	0.322514
G1T418	2104.6	1620.6	1721.1	1887.6	2227.3	2524.4	Uncharacterized protein OS=Oryctolagus cuniculus OX=9986 PE=4 SV=1	1.21905	0.285755	0.166948
G1U7F2	1429.1	1100.5	1212.3	1028.6	1100.6	850.7	Mitogen-activated protein kinase-activated protein kinase 3 OS=Oryctolagus cuniculus OX=9986 GN=MAPKAPK3 PE=4 SV=1	0.79636	-0.328507	0.105252
G1SCZ4	15520.6	11953.3	11947.4	14675.5	13834.6	16557.7	Lamin B receptor OS=Oryctolagus cuniculus OX=9986 GN=LBR PE=4 SV=1	1.14324	0.193122	0.260367
G1TRH3	5472.3	4214.7	4894.2	5112.1	5392.7	6845.9	Cathepsin Z OS=Oryctolagus cuniculus OX=9986 GN=CTSZ PE=3 SV=1	1.18994	0.250884	0.227779
G1SGV5	5937.2	4573.4	5054	4291	4917.3	3366.4	ATP binding cassette subfamily F member 1 OS=Oryctolagus cuniculus OX=9986 GN=ABCF1 PE=4 SV=1	0.807904	-0.307744	0.173161
G1TN14	1374.8	1059.4	1123.3	1132.6	1109.7	752.6	Uncharacterized protein OS=Oryctolagus cuniculus OX=9986 GN=PUF60 PE=4 SV=2	0.841855	-0.248356	0.296184
G1SR27	3869.9	2982.1	3711.1	3303.1	3347.4	2596	Growth factor receptor bound protein 2 OS=Oryctolagus cuniculus OX=9986 GN=GRB2 PE=1 SV=1	0.875359	-0.192053	0.296685
G1U027	4655	3587.1	4257	3542.5	4352.2	3798.5	Vav guanine nucleotide exchange factor 1 OS=Oryctolagus cuniculus OX=9986 GN=VAV1 PE=4 SV=2	0.935523	-0.096155	0.53147
G1SPI2	1137.3	876.5	942.6	855	886.4	470.3	Tetratricopeptide repeat domain 1 OS=Oryctolagus cuniculus OX=9986 GN=TTC1 PE=4 SV=1	0.748106	-0.418685	0.184507
G1U7I9	19077.3	14703.7	15674.6	17996.5	18066.8	16521.8	DExD-box helicase 39B OS=Oryctolagus cuniculus OX=9986 GN=DDX39B PE=4 SV=1	1.06328	0.0885202	0.502873
Q01059	15729.3	12124.6	12701.6	10406.6	11707.8	7587.9	Cytoplasmic aconitate hydratase OS=Oryctolagus cuniculus OX=9986 GN=ACO1 PE=1 SV=1	0.732386	-0.449324	0.093659
G1TPA9	1313.3	1012.6	1133.9	1011.7	1195.3	1458.3	Arrestin beta 2 OS=Oryctolagus cuniculus OX=9986 GN=ARRB2 PE=4 SV=1	1.0594	0.083242	0.683798
G1TC77	1550.3	1195.6	1299.5	1281.9	1254.4	3202.9	Zinc finger protein 330 OS=Oryctolagus cuniculus OX=9986 GN=ZNF330 PE=4 SV=1	1.4187	0.504568	0.436339
G1TN62	8931.4	6888.3	7845.6	8265.8	5677.3	7898.4	Uncharacterized protein OS=Oryctolagus cuniculus OX=9986 GN=LOC100345774 PE=1 SV=1	0.922934	-0.115701	0.576445
G1SLF0	1319.5	1017.8	1317.7	1443.3	1447.8	1405.5	Serine incorporator 3 OS=Oryctolagus cuniculus OX=9986 GN=SERINC3 PE=4 SV=1	1.17554	0.233324	0.102016
G1SYP7	183.3	141.4	163.5	174.1	174.8	199	DNA-directed RNA polymerase subunit OS=Oryctolagus cuniculus OX=9986 GN=POLR1A PE=3 SV=2	1.12229	0.16644	0.244835
G1T3R1	801.8	618.7	596	668	737	507.2	Glutaredoxin 5 OS=Oryctolagus cuniculus OX=9986 GN=GLRX5 PE=4 SV=1	0.948277	-0.0766196	0.730855
G1SFX7	3459.1	2670	3212.1	2949	3068.5	1873.4	ADP ribosylation factor 6 OS=Oryctolagus cuniculus OX=9986 GN=ARF6 PE=3 SV=1	0.844742	-0.243417	0.339154
G1T3D8	7167.1	5534	5955.3	6036.1	5563.4	5384	40S ribosomal protein S24 OS=Oryctolagus cuniculus OX=9986 GN=RPS24 PE=1 SV=1	0.910331	-0.135537	0.349438
G1SIT9	6163.2	4759.1	5193	4228.5	5416.3	7453.5	Tyrosine 3-monooxygenase/tryptophan 5-monooxygenase activation protein beta OS=Oryctolagus cuniculus OX=9986 GN=YWHAB PE=3 SV=1	1.061	0.0854219	0.766111
G1STS6	1037.4	801.1	900.8	1123.8	1157.1	557.3	Uncharacterized protein OS=Oryctolagus cuniculus OX=9986 GN=LOC100342240 PE=3 SV=2	1.0361	0.0511688	0.880795
G1TZV1	15598.3	12049.6	13424.3	14153.2	13810.8	17157.3	Carboxylic ester hydrolase OS=Oryctolagus cuniculus OX=9986 GN=LOC100351488 PE=3 SV=1	1.09858	0.135646	0.414045
G1U7M4	1568	1211.5	1405.7	1313.6	1038.9	729.5	Uncharacterized protein OS=Oryctolagus cuniculus OX=9986 GN=RPS29 PE=1 SV=1	0.736404	-0.441431	0.136386
G1TGB6	1115.7	862.2	934.3	896.8	915.1	694.6	Uncharacterized protein OS=Oryctolagus cuniculus OX=9986 PE=4 SV=1	0.86069	-0.216434	0.260765
G1SZF7	24529	18958.1	21123.1	24596.6	26760.3	37954.6	Isocitrate dehydrogenase [NADP] OS=Oryctolagus cuniculus OX=9986 GN=IDH2 PE=3 SV=1	1.38231	0.467084	0.137657
G1ST49	1784.3	1379.1	1536.7	1418.9	1503.9	1398.1	Uncharacterized protein OS=Oryctolagus cuniculus OX=9986 GN=TCEA1 PE=4 SV=1	0.919321	-0.121359	0.359709
U3KP89	567.1	438.4	509.1	449	520.9	467.4	Membrane palmitoylated protein 7 OS=Oryctolagus cuniculus OX=9986 GN=MPP7 PE=3 SV=1	0.948963	-0.0755763	0.581389
G1TV71	250	193.3	234.8	328.4	358.6	257.6	Uncharacterized protein OS=Oryctolagus cuniculus OX=9986 PE=4 SV=1	1.39301	0.478206	0.061149
G1SST6	759.7	587.4	721.8	749.9	705.2	611.3	Armadillo repeat containing 10 OS=Oryctolagus cuniculus OX=9986 GN=ARMC10 PE=4 SV=1	0.998792	-0.00174383	0.990579
G1TD91	3893.3	3010.6	3469.9	3305	3409.1	3145	Uncharacterized protein OS=Oryctolagus cuniculus OX=9986 GN=NUDT21 PE=4 SV=1	0.950385	-0.073416	0.554356
G1SXH7	3989.3	3086.2	3186.8	3029.3	3727.1	2600.5	Tyrosine-protein kinase OS=Oryctolagus cuniculus OX=9986 GN=SRC PE=3 SV=1	0.911774	-0.133252	0.526208
G1U9B4	3118.3	2412.7	2741.9	3106.9	2910.9	5361.2	Transformer 2 beta homolog OS=Oryctolagus cuniculus OX=9986 GN=TRA2B PE=4 SV=1	1.37546	0.459909	0.271375
P68105	30660.9	23726.2	28769.3	21917	26648.1	33053.9	Elongation factor 1-alpha 1 OS=Oryctolagus cuniculus OX=9986 GN=EEF1A1 PE=1 SV=1	0.981512	-0.0269222	0.900116
G1TFE0	1794.1	1388.9	1735.1	1606.4	1449.4	3269.2	Uncharacterized protein OS=Oryctolagus cuniculus OX=9986 GN=RPL18 PE=4 SV=1	1.28607	0.362965	0.475202
G1TBH5	5426.1	4204.2	5044.2	4873.8	4698.9	3382.6	Uncharacterized protein OS=Oryctolagus cuniculus OX=9986 GN=BCLAF1 PE=4 SV=2	0.882844	-0.17977	0.388634
G1T892	1037.8	804.2	884.9	870.8	881.6	408.7	Microtubule associated protein RP/EB family member 3 OS=Oryctolagus cuniculus OX=9986 GN=MAPRE3 PE=4 SV=1	0.792512	-0.335495	0.330088
G1SYB4	11460.4	8880.6	10486.5	9100	10946.1	15303.2	Uncharacterized protein OS=Oryctolagus cuniculus OX=9986 GN=CDC42 PE=4 SV=1	1.14668	0.197464	0.490318
G1T853	11586.5	8983.1	7316.4	8203.8	12751.5	9233.4	Calcium-transporting ATPase OS=Oryctolagus cuniculus OX=9986 GN=ATP2A3 PE=3 SV=2	1.08258	0.114467	0.700188
G1ST71	692.6	537	568.6	520.9	702.1	1007.3	Uncharacterized protein OS=Oryctolagus cuniculus OX=9986 GN=CASP4 PE=3 SV=2	1.2403	0.310684	0.390339
P19943	3588.7	2783.9	2452.1	2771.7	3267	4249.3	60S acidic ribosomal protein P2 (Fragment) OS=Oryctolagus cuniculus OX=9986 GN=RPLP2 PE=1 SV=1	1.16582	0.221344	0.425194
G1TZQ8	233	180.8	211.6	173	195.3	146.4	Uncharacterized protein OS=Oryctolagus cuniculus OX=9986 PE=4 SV=2	0.822993	-0.281048	0.149525
G1SS76	560.4	435	485.4	508.5	531.1	936.2	PHD finger protein 6 OS=Oryctolagus cuniculus OX=9986 GN=PHF6 PE=4 SV=2	1.33428	0.41606	0.314726
G1SGX6	252.1	195.7	248.7	242.8	282.8	812.6	Short chain dehydrogenase/reductase family 39U member 1 OS=Oryctolagus cuniculus OX=9986 GN=SDR39U1 PE=4 SV=1	1.92132	0.942099	0.310887
G1SJZ4	7138.8	5544.5	6044	4816.1	5516.6	2817.6	Obg-like ATPase 1 OS=Oryctolagus cuniculus OX=9986 GN=OLA1 PE=3 SV=2	0.702199	-0.510048	0.117884
G1T1W5	253.7	197	215.5	301.3	178.5	319.5	Uncharacterized protein OS=Oryctolagus cuniculus OX=9986 GN=KLF5 PE=4 SV=1	1.19979	0.262782	0.401555
G1T3S7	1351.2	1049.5	1203.6	1002.8	1283	956.1	alpha-1,2-Mannosidase OS=Oryctolagus cuniculus OX=9986 GN=MAN1A2 PE=3 SV=1	0.899453	-0.15288	0.418895
G1SQB4	304.8	236.8	227.3	211.8	259.3	241.5	Multimerin 1 OS=Oryctolagus cuniculus OX=9986 GN=MMRN1 PE=4 SV=1	0.926779	-0.109703	0.540281
G1TAP1	364.1	282.9	289.3	293	400	199.3	Pyrophosphatase (inorganic) 1 OS=Oryctolagus cuniculus OX=9986 GN=PPA1 PE=4 SV=2	0.953007	-0.0694413	0.828853
G1TCC8	802.4	623.5	758	830.9	765.2	490.7	BCAS2, pre-mRNA processing factor OS=Oryctolagus cuniculus OX=9986 GN=BCAS2 PE=4 SV=1	0.955538	-0.0656148	0.796192
G1SHW5	711.3	552.7	716.1	566.3	551.7	371	Queuine tRNA-ribosyltransferase accessory subunit 2 OS=Oryctolagus cuniculus OX=9986 GN=QTRT2 PE=3 SV=2	0.751982	-0.41123	0.118633
G1SGW6	216.8	168.5	186.4	202.7	215.4	211.5	Protein phosphatase 1 regulatory subunit 10 OS=Oryctolagus cuniculus OX=9986 GN=PPP1R10 PE=4 SV=1	1.10128	0.139177	0.256439
G1SZH6	3179.9	2471.9	2841.7	2795.5	2969.8	2260.3	Oxysterol-binding protein OS=Oryctolagus cuniculus OX=9986 GN=OSBPL8 PE=3 SV=2	0.944911	-0.0817496	0.625646
G1SYY2	970.1	754.4	926	789.2	817.7	483.1	Spastin OS=Oryctolagus cuniculus OX=9986 GN=SPAST PE=3 SV=1	0.78853	-0.342762	0.211368
G1SZQ7	10673.1	8301	8892.2	8571	9955.2	6929.4	Basic leucine zipper and W2 domains 1 OS=Oryctolagus cuniculus OX=9986 GN=BZW1 PE=4 SV=1	0.91349	-0.130539	0.515676
G1SHE3	437.6	340.3	400.7	444.4	436.3	310.1	Uncharacterized protein OS=Oryctolagus cuniculus OX=9986 PE=4 SV=1	1.01035	0.0148566	0.941321
G1TC03	8031.2	6246.6	7449.9	6890.7	6199.2	6965.3	Tripartite motif containing 28 OS=Oryctolagus cuniculus OX=9986 GN=TRIM28 PE=4 SV=1	0.923025	-0.115558	0.390387
G1TDZ8	1896.3	1475.3	1608.3	1672.7	1496.6	1097.7	OTU deubiquitinase with linear linkage specificity like OS=Oryctolagus cuniculus OX=9986 GN=OTULINL PE=4 SV=1	0.856845	-0.222894	0.322337
G1TP81	5573.5	4336.6	4961.4	4595.9	4900.7	3829.1	WAS protein family member 2 OS=Oryctolagus cuniculus OX=9986 GN=WASF2 PE=4 SV=1	0.896056	-0.158339	0.342314
G1TE03	1057.5	822.9	889.2	1091.8	1003.7	1175.6	Testis expressed 264 OS=Oryctolagus cuniculus OX=9986 GN=TEX264 PE=4 SV=1	1.18107	0.240098	0.122758
U3KMB9	1165.4	906.9	1298.1	1195.9	878.2	1015.5	Uncharacterized protein OS=Oryctolagus cuniculus OX=9986 PE=4 SV=1	0.916686	-0.1255	0.559315
G1SDK5	875.3	681.3	721.6	682.3	727	625.5	Family with sequence similarity 192 member A OS=Oryctolagus cuniculus OX=9986 GN=FAM192A PE=4 SV=2	0.893161	-0.163008	0.286336
G1TCQ4	8649.8	6735.3	7588.4	6074.9	6943.5	4517.2	Glucosamine-6-phosphate isomerase OS=Oryctolagus cuniculus OX=9986 GN=GNPDA1 PE=3 SV=1	0.763297	-0.389684	0.114339
G1SLH7	24158.6	18813.4	19505.6	18574.4	18973.3	13108.6	Epidermal growth factor receptor pathway substrate 15 OS=Oryctolagus cuniculus OX=9986 GN=EPS15 PE=4 SV=1	0.810791	-0.302598	0.194216
Q8WND5	484.6	377.4	450.2	479	483.6	403.6	Elongator complex protein 1 OS=Oryctolagus cuniculus OX=9986 GN=ELP1 PE=2 SV=1	1.04115	0.0581807	0.682459
G1TQJ5	6088.7	4742.1	5468.9	5802.1	5443.3	4721.3	DEK proto-oncogene OS=Oryctolagus cuniculus OX=9986 GN=DEK PE=4 SV=2	0.97957	-0.0297795	0.835969
G1SEH5	522.9	407.5	470.3	489.9	345.1	336.7	PNN interacting serine and arginine rich protein OS=Oryctolagus cuniculus OX=9986 GN=PNISR PE=4 SV=2	0.83651	-0.257545	0.271388
G1SH51	501.4	390.8	493.2	484.2	414.6	419.2	ERCC excision repair 3, TFIIH core complex helicase subunit OS=Oryctolagus cuniculus OX=9986 GN=ERCC3 PE=4 SV=1	0.95135	-0.0719519	0.621713
G1T3Q4	405.3	315.8	472.1	231.8	225	776.6	Calmodulin like 5 OS=Oryctolagus cuniculus OX=9986 GN=CALML5 PE=4 SV=1	1.03369	0.047805	0.946675
G1TRK3	4805.3	3747.6	3786.9	3688	4223.2	2990.4	Uncharacterized protein OS=Oryctolagus cuniculus OX=9986 PE=4 SV=1	0.88345	-0.17878	0.389574
G1T069	5296.4	4131.4	5366.1	5577.1	4970.2	5167.9	Nuclear pore complex protein OS=Oryctolagus cuniculus OX=9986 GN=NUP107 PE=3 SV=2	1.06228	0.0871587	0.522328
G1TBL6	69003.1	53839.5	65858.4	75326.2	62502.3	85096.3	Clathrin heavy chain OS=Oryctolagus cuniculus OX=9986 GN=CLTC PE=3 SV=2	1.18136	0.240455	0.22746
G1SDC7	241.9	188.8	202.8	196.3	231.4	235.4	Replication protein A3 OS=Oryctolagus cuniculus OX=9986 GN=RPA3 PE=4 SV=1	1.04672	0.0658825	0.650292
G1SY88	7330.4	5719.7	6782.8	5312.1	6577.8	4311.3	Adenosine kinase OS=Oryctolagus cuniculus OX=9986 GN=ADK PE=4 SV=1	0.816885	-0.291795	0.208648
G1TJG6	36002.7	28092.9	31574.8	21971.5	25802.6	28477.6	Glyceraldehyde-3-phosphate dehydrogenase OS=Oryctolagus cuniculus OX=9986 PE=3 SV=1	0.797025	-0.327303	0.094573
G1U8P2	560.8	437.7	507.4	487.5	427.4	377.6	Ribosomal protein L19 OS=Oryctolagus cuniculus OX=9986 GN=RPL19 PE=3 SV=1	0.858291	-0.220461	0.210511
G1SHQ2	7469.6	5833.2	6939.1	6662.8	5150.2	15464.3	Uncharacterized protein OS=Oryctolagus cuniculus OX=9986 GN=LOC108175794 PE=1 SV=1	1.34757	0.430356	0.51068
G1TGR5	281	219.4	204.2	222	260.8	213.5	Potassium channel subfamily K member OS=Oryctolagus cuniculus OX=9986 GN=KCNK6 PE=3 SV=1	0.98822	-0.0170958	0.92505
G1T8J4	388.4	303.3	301.1	349.2	436.4	425.6	Sphingolipid transporter 3 (putative) OS=Oryctolagus cuniculus OX=9986 GN=SPNS3 PE=4 SV=2	1.21998	0.286862	0.140909
G1SPD9	342.3	267.3	302.2	309	372.4	208.3	Oxysterol-binding protein OS=Oryctolagus cuniculus OX=9986 GN=OSBPL2 PE=3 SV=2	0.975762	-0.0353988	0.895115
G1U8R2	1022.8	799	880.1	796.6	903.4	635.7	Uncharacterized protein OS=Oryctolagus cuniculus OX=9986 PE=4 SV=1	0.864466	-0.210119	0.296051
G1T7L5	2413.8	1886.1	2021.1	1700.3	1811.1	1741.3	Inositol-1-monophosphatase OS=Oryctolagus cuniculus OX=9986 GN=IMPA1 PE=3 SV=1	0.830992	-0.267094	0.092204
G1TTJ1	4624.8	3613.9	3968.8	3730.8	4919.3	3247.4	Dehydrogenase/reductase 11 OS=Oryctolagus cuniculus OX=9986 GN=DHRS11 PE=3 SV=1	0.974606	-0.037109	0.86687
G1T9C8	1178.8	921.2	993.1	1103.2	1056.8	1075.8	HtrA serine peptidase 2 OS=Oryctolagus cuniculus OX=9986 GN=HTRA2 PE=4 SV=1	1.04614	0.065069	0.574524
G1SFE4	3996.1	3123.1	3396	2949	3382.3	2122.5	Uncharacterized protein OS=Oryctolagus cuniculus OX=9986 GN=SYNJ1 PE=4 SV=2	0.80396	-0.314804	0.201961
G1T783	994.7	777.4	909	920.1	954.1	626.3	SHOC2, leucine rich repeat scaffold protein OS=Oryctolagus cuniculus OX=9986 GN=SHOC2 PE=4 SV=1	0.93264	-0.100608	0.646906
G1SNX5	16470.4	12872.8	14339.4	17681	16440.2	19765.6	Interleukin enhancer binding factor 2 OS=Oryctolagus cuniculus OX=9986 GN=ILF2 PE=4 SV=2	1.2336	0.302874	0.07549
G1SVI1	2082.7	1627.9	1716.9	1751.7	2151	1404.9	Tyrosine-protein phosphatase non-receptor type OS=Oryctolagus cuniculus OX=9986 GN=PTPN1 PE=3 SV=1	0.977909	-0.0322279	0.883759
G1U4P7	499.9	390.8	422.7	452.4	512.8	454.4	Superoxide dismutase OS=Oryctolagus cuniculus OX=9986 PE=3 SV=1	1.08086	0.112178	0.403886
G1SNP4	10929	8543.4	10542.3	10284	9548.5	8639.6	Thyroid hormone receptor associated protein 3 OS=Oryctolagus cuniculus OX=9986 GN=THRAP3 PE=4 SV=1	0.948605	-0.0761206	0.589965
G1TC61	7197.3	5627.2	6326.4	6625	6597.1	4685.4	LUC7 like 2, pre-mRNA splicing factor OS=Oryctolagus cuniculus OX=9986 GN=LUC7L2 PE=4 SV=1	0.935074	-0.0968476	0.626015
G1TZP0	18831.7	14724.1	14691.8	12099.9	15040.9	11636	Tyrosine 3-monooxygenase/tryptophan 5-monooxygenase activation protein gamma OS=Oryctolagus cuniculus OX=9986 GN=YWHAG PE=3 SV=1	0.803704	-0.315264	0.143748
P53787	11146.2	8715.8	9359.5	8199.1	9247.2	6651.2	Elongation factor 1-delta OS=Oryctolagus cuniculus OX=9986 GN=EEF1D PE=2 SV=1	0.82465	-0.278146	0.17829
G1T2G3	1843.5	1441.6	1721.3	1585.5	1603	2160.1	E3 ubiquitin protein ligase OS=Oryctolagus cuniculus OX=9986 GN=RNF20 PE=3 SV=1	1.06835	0.0953884	0.63601
G1SXC6	1020.9	798.4	970.3	812.4	994.4	573	ADP-ribosylarginine hydrolase OS=Oryctolagus cuniculus OX=9986 GN=ADPRH PE=4 SV=1	0.853097	-0.229218	0.382518
G1T5Y2	8860.4	6932.4	7820	7103.2	8241.5	6872.9	Family with sequence similarity 49 member B OS=Oryctolagus cuniculus OX=9986 GN=FAM49B PE=4 SV=2	0.940913	-0.0878668	0.542555
G1SHA4	5751.6	4500.2	4970.2	5234.7	6270.4	4411.9	Telomerase associated protein 1 OS=Oryctolagus cuniculus OX=9986 GN=TEP1 PE=4 SV=1	1.04566	0.0644111	0.739476
G1TYF2	354.8	277.8	383.5	287.8	350.6	239.7	G protein-coupled receptor kinase OS=Oryctolagus cuniculus OX=9986 GN=GRK3 PE=3 SV=1	0.864187	-0.210585	0.364651
U3KN16	5075.1	3973.8	4765.6	4654.5	5415.8	2719.2	Inosine-5'-monophosphate dehydrogenase OS=Oryctolagus cuniculus OX=9986 GN=IMPDH1 PE=3 SV=1	0.925803	-0.111223	0.713647
G1SE57	2356.6	1845.3	2167.8	2173.7	2377.5	2299.3	ADP ribosylation factor 4 OS=Oryctolagus cuniculus OX=9986 GN=ARF4 PE=3 SV=1	1.07548	0.104983	0.374905
G1STW7	7651	5991.5	6725	7083.4	6767.5	4857.4	Phenylalanyl-tRNA synthetase subunit beta OS=Oryctolagus cuniculus OX=9986 GN=FARSB PE=4 SV=2	0.918537	-0.12259	0.548509
G1TJL6	664.6	520.6	583.6	631.4	696.9	782.2	ORAI calcium release-activated calcium modulator 1 OS=Oryctolagus cuniculus OX=9986 GN=ORAI1 PE=4 SV=1	1.19318	0.254814	0.132191
G1SF38	3475.2	2722.7	3342.4	3334.4	2924.4	2699.5	Zinc finger CCCH-type containing 18 OS=Oryctolagus cuniculus OX=9986 GN=ZC3H18 PE=4 SV=1	0.938996	-0.0908091	0.549502
U3KNF6	631.8	495	761.1	552.5	606.8	299.2	Uncharacterized protein OS=Oryctolagus cuniculus OX=9986 GN=IFIT3 PE=4 SV=1	0.772552	-0.372296	0.305845
G1T146	1510.1	1183.3	1505.1	1445	1286.5	613.8	Metastasis associated 1 OS=Oryctolagus cuniculus OX=9986 GN=MTA1 PE=4 SV=1	0.796785	-0.327738	0.362242
G1SH26	2825.8	2214.5	2637.3	2259.8	2579.2	1383.1	Glyoxalase domain containing 4 OS=Oryctolagus cuniculus OX=9986 GN=GLOD4 PE=4 SV=2	0.810423	-0.303253	0.292559
G1SF47	8239.2	6457.8	6543.6	6007.3	6997.2	4246.6	Septin 11 OS=Oryctolagus cuniculus OX=9986 GN=SEPT11 PE=3 SV=2	0.812176	-0.300136	0.251006
G1SDZ7	252.9	198.2	259.6	208.3	221	220.7	Protein arginine methyltransferase 3 OS=Oryctolagus cuniculus OX=9986 GN=PRMT3 PE=3 SV=2	0.914591	-0.128801	0.366586
G1U7C9	1282.8	1005.6	1203.3	1092.6	1252.8	760.7	Centromere protein F OS=Oryctolagus cuniculus OX=9986 GN=CENPF PE=4 SV=1	0.889567	-0.168825	0.48371
G1T302	2485.6	1948.7	2172.2	2027.6	2244.9	1299.2	Thymocyte nuclear protein 1 OS=Oryctolagus cuniculus OX=9986 GN=THYN1 PE=4 SV=1	0.843366	-0.245769	0.349192
G1TAM8	2688.9	2108.8	2665.6	2365.3	2574.5	2342.2	Proteasome activator subunit 3 OS=Oryctolagus cuniculus OX=9986 GN=PSME3 PE=4 SV=1	0.975708	-0.0354786	0.781262
G1T9Y7	183.8	144.2	225.3	217.5	167.4	162.9	Tripartite motif containing 10 OS=Oryctolagus cuniculus OX=9986 GN=TRIM10 PE=4 SV=2	0.99006	-0.0144121	0.952998
G1TX81	6191.7	4856.4	5406.9	6721.5	6439.8	7339	Galectin OS=Oryctolagus cuniculus OX=9986 GN=LGALS9 PE=4 SV=2	1.24584	0.317119	0.045432
G1TJR3	5048.9	3960.5	4124.2	4384.5	3911.8	5900.7	Ribosomal protein L19 OS=Oryctolagus cuniculus OX=9986 PE=1 SV=1	1.08097	0.112324	0.634038
G1T7Z6	29678.4	23285.5	25940.1	19413.8	25341.2	21963.2	Phosphoglycerate kinase OS=Oryctolagus cuniculus OX=9986 GN=PGK1 PE=3 SV=1	0.845562	-0.242018	0.18323
G1T043	322	252.7	253.9	260.6	273.3	303.9	Peroxisomal biogenesis factor 11 gamma OS=Oryctolagus cuniculus OX=9986 GN=PEX11G PE=4 SV=2	1.0111	0.01593	0.912668
G1SNE5	1655.5	1299.2	1479.6	1717	1852	985.7	Thioesterase superfamily member 4 OS=Oryctolagus cuniculus OX=9986 GN=THEM4 PE=4 SV=1	1.02715	0.0386497	0.895939
G1T8V9	716.9	562.8	654.8	588.7	602.8	457.5	WASH complex subunit 3 OS=Oryctolagus cuniculus OX=9986 GN=WASHC3 PE=4 SV=1	0.852417	-0.230369	0.213391
G1TY38	874.2	686.4	965.1	738.3	626	692.9	Interferon induced protein with tetratricopeptide repeats 5 OS=Oryctolagus cuniculus OX=9986 GN=IFIT5 PE=4 SV=1	0.814507	-0.296001	0.151699
G1SSB2	1191.2	935.4	1144.2	1298	1184.7	945	ADAM metallopeptidase domain 15 OS=Oryctolagus cuniculus OX=9986 GN=ADAM15 PE=4 SV=1	1.04797	0.0675974	0.708897
G1TJA8	6869.2	5393.9	5661.5	5217.6	6034.2	4677.1	Formin binding protein 1 OS=Oryctolagus cuniculus OX=9986 GN=FNBP1 PE=4 SV=1	0.888661	-0.170295	0.330617
G1SHD6	4302.5	3379.2	3814.6	3188.1	3638.5	2711.1	S-adenosylmethionine synthase OS=Oryctolagus cuniculus OX=9986 GN=MAT2A PE=3 SV=2	0.829632	-0.269457	0.159126
G1SD98	5829.7	4579.1	5249.6	5281.8	4963.4	4159.8	Pre-mRNA processing factor 4B OS=Oryctolagus cuniculus OX=9986 GN=PRPF4B PE=4 SV=2	0.919954	-0.120366	0.443563
G1T5Q4	1500.5	1179.1	1444.2	1251.4	1656.4	743.6	RWD domain containing 1 OS=Oryctolagus cuniculus OX=9986 GN=RWDD1 PE=4 SV=1	0.885445	-0.175525	0.606404
G1TDN3	4398.5	3456.4	3759.2	4536	3938.5	3211.9	Small nuclear ribonucleoprotein polypeptide A' OS=Oryctolagus cuniculus OX=9986 GN=SNRPA1 PE=4 SV=1	1.00622	0.00895294	0.961802
G1SSZ1	855.3	672.3	709	659	805.8	708.6	Down-regulator of transcription 1 OS=Oryctolagus cuniculus OX=9986 GN=DR1 PE=4 SV=1	0.971743	-0.0413533	0.780236
G1STL1	1274.5	1001.9	1138.5	1148.3	1186.5	1202.8	Peptidylprolyl isomerase like 4 OS=Oryctolagus cuniculus OX=9986 GN=PPIL4 PE=4 SV=1	1.03593	0.0509279	0.637461
G1T4L6	254.6	200.2	247.5	271.5	252.2	348	SYF2 pre-mRNA splicing factor OS=Oryctolagus cuniculus OX=9986 GN=SYF2 PE=4 SV=1	1.24121	0.311744	0.170812
G1U0J6	1835.8	1443.4	1503.1	1790.6	1840.3	1471	Ceramide synthase 2 OS=Oryctolagus cuniculus OX=9986 GN=CERS2 PE=4 SV=2	1.06683	0.0933303	0.560891
G1U8T9	7223.2	5680	5707.9	5331.3	5826.2	4468.1	Potassium channel tetramerization domain containing 12 OS=Oryctolagus cuniculus OX=9986 GN=KCTD12 PE=4 SV=2	0.839585	-0.252252	0.198312
G1SS81	110.7	87.1	108.2	96.1	115.6	138.2	Ess-2 splicing factor homolog OS=Oryctolagus cuniculus OX=9986 GN=ESS2 PE=4 SV=1	1.14346	0.193411	0.363486
G1T4N8	7589.8	5969.5	6087.4	6420.6	6685.3	4234.2	Ubiquitin associated and SH3 domain containing B OS=Oryctolagus cuniculus OX=9986 GN=UBASH3B PE=4 SV=2	0.882596	-0.180175	0.457337
G1TUC2	624.5	491.3	585.4	605.1	575.4	314.4	CCHC-type zinc finger nucleic acid binding protein OS=Oryctolagus cuniculus OX=9986 GN=CNBP PE=4 SV=1	0.878733	-0.186503	0.531225
G1T1C6	717	564	586.6	712.7	887.8	1226.3	Elongation of very long chain fatty acids protein 5 OS=Oryctolagus cuniculus OX=9986 GN=ELOVL5 PE=3 SV=1	1.5136	0.597984	0.113203
G1SZJ9	502.2	395.1	489.3	460.7	491.3	403.9	Transcriptional adaptor 1 OS=Oryctolagus cuniculus OX=9986 GN=TADA1 PE=4 SV=1	0.97786	-0.0323002	0.82102
G1SHR3	8009.5	6303.2	6327.9	6656.4	8329.3	5250.8	RUN and FYVE domain containing 1 OS=Oryctolagus cuniculus OX=9986 GN=RUFY1 PE=4 SV=2	0.980422	-0.0285252	0.904463
G1TQT7	673.2	529.9	634.6	595.1	635.8	483.2	Bromodomain containing 3 OS=Oryctolagus cuniculus OX=9986 GN=BRD3 PE=4 SV=1	0.932742	-0.10045	0.546163
G1SSB4	2572.5	2025.7	2276.6	2118.4	2162.2	1236	Uncharacterized protein OS=Oryctolagus cuniculus OX=9986 PE=3 SV=1	0.802438	-0.317538	0.254496
G1TGW1	8187	6447.9	7331.7	6115.5	7044.5	4842.2	Uncharacterized protein OS=Oryctolagus cuniculus OX=9986 PE=4 SV=1	0.819526	-0.287138	0.179026
G1T3Y0	3643.5	2869.5	3221.2	3389.8	2535.5	2406.9	DAB2, clathrin adaptor protein OS=Oryctolagus cuniculus OX=9986 GN=DAB2 PE=4 SV=2	0.855972	-0.224364	0.287291
G1T4N4	4600.5	3623.3	3920.1	3781.8	3773.9	3036.6	La ribonucleoprotein domain family member 1 OS=Oryctolagus cuniculus OX=9986 GN=LARP1 PE=4 SV=1	0.872232	-0.197216	0.245565
G1SD73	792.3	624	713.2	680.1	722.6	506.9	Lysophospholipase like 1 OS=Oryctolagus cuniculus OX=9986 GN=LYPLAL1 PE=4 SV=2	0.896736	-0.157245	0.421612
G1SPB2	2110	1662.1	1811.2	1774.6	1859.2	1183.4	mRNA cap guanine-N7 methyltransferase OS=Oryctolagus cuniculus OX=9986 GN=RNMT PE=3 SV=1	0.862787	-0.212924	0.36488
G1T2U1	708.1	557.8	625.4	457	534.5	391.3	Amidophosphoribosyltransferase OS=Oryctolagus cuniculus OX=9986 GN=PPAT PE=3 SV=1	0.731137	-0.451786	0.047615
G1SI94	1073.6	845.8	913.3	767.3	901.2	684.8	Cytokine receptor like factor 3 OS=Oryctolagus cuniculus OX=9986 GN=CRLF3 PE=4 SV=2	0.830762	-0.267493	0.158818
G1SPS8	4087.7	3221.1	3501.4	3010.4	3568.1	2317.9	E74 like ETS transcription factor 1 OS=Oryctolagus cuniculus OX=9986 GN=ELF1 PE=4 SV=1	0.822963	-0.281101	0.222979
G1SWX6	236.2	186.2	212.9	232.5	205.5	136.4	Choline phosphotransferase 1 OS=Oryctolagus cuniculus OX=9986 GN=CHPT1 PE=3 SV=1	0.90414	-0.145382	0.560941
G1SKF0	2871.5	2263.6	2584.4	2698.3	3013.5	1983.1	Uncharacterized protein OS=Oryctolagus cuniculus OX=9986 PE=3 SV=1	0.996813	-0.00460521	0.982519
G1U1H2	427.5	337.1	363.9	337.7	372.9	406.3	Uncharacterized protein OS=Oryctolagus cuniculus OX=9986 GN=LOC100349535 PE=4 SV=1	0.989721	-0.0149062	0.913234
G1T9L4	3381.3	2665.7	2630	3228	2987.8	10561.2	Uncharacterized protein OS=Oryctolagus cuniculus OX=9986 GN=CAMP PE=3 SV=1	1.9335	0.951216	0.340471
G1T8M5	17864.5	14085	13072.9	17424.5	20259	25932.1	Macrophage expressed 1 OS=Oryctolagus cuniculus OX=9986 GN=MPEG1 PE=4 SV=1	1.41298	0.498738	0.099
G1T201	2582.6	2036.4	2326.9	2055.4	2356.8	1806.1	Receptor interacting serine/threonine kinase 1 OS=Oryctolagus cuniculus OX=9986 GN=RIPK1 PE=4 SV=1	0.895248	-0.159641	0.340115
G1SY12	906.4	714.7	872.9	845.8	763	736.3	G protein nucleolar 3 OS=Oryctolagus cuniculus OX=9986 GN=GNL3 PE=4 SV=1	0.940297	-0.0888116	0.504023
G1TMQ5	1620.9	1278.4	1467	1283.3	1613.1	761	Uncharacterized protein OS=Oryctolagus cuniculus OX=9986 GN=MYCBP PE=4 SV=2	0.837643	-0.255593	0.426306
G1SFZ8	1689.9	1333.4	1403.1	1214.5	1398.9	841.5	Ubiquilin 1 OS=Oryctolagus cuniculus OX=9986 GN=UBQLN1 PE=4 SV=2	0.780521	-0.357491	0.175429
G1U5D4	424.1	334.6	373.1	416.1	412	276.5	tRNA pseudouridine synthase OS=Oryctolagus cuniculus OX=9986 PE=3 SV=2	0.975967	-0.0350957	0.871716
G1SZC6	145.5	114.8	143.6	124.5	106.3	56	Forkhead box O3 OS=Oryctolagus cuniculus OX=9986 GN=FOXO3 PE=4 SV=1	0.710077	-0.493953	0.161577
G1SDU6	7887.2	6224.3	7262.9	5634.5	7348.4	3876.4	Threonyl-tRNA synthetase OS=Oryctolagus cuniculus OX=9986 GN=TARS PE=3 SV=1	0.788761	-0.34234	0.247866
G1SUP4	1159.3	914.9	1074.8	1108.7	1097.1	854	Zinc finger protein 207 OS=Oryctolagus cuniculus OX=9986 GN=ZNF207 PE=4 SV=1	0.971674	-0.0414557	0.799739
G1SQK0	3727.6	2942.3	3121.9	3672.7	3346	3795.7	Staufen double-stranded RNA binding protein 1 OS=Oryctolagus cuniculus OX=9986 GN=STAU1 PE=4 SV=2	1.10443	0.143307	0.279656
G1SLR5	1667.4	1316.3	1432.2	1579.4	1504.6	1756.7	Nuclear transcription factor Y subunit beta OS=Oryctolagus cuniculus OX=9986 GN=NFYB PE=4 SV=2	1.0962	0.132508	0.329002
G1SLT2	4867.2	3843.4	4696.4	4487.6	4169.8	3004.8	Uncharacterized protein OS=Oryctolagus cuniculus OX=9986 PE=4 SV=2	0.869859	-0.201147	0.350599
G1TAF8	24181.5	19099.7	22813.7	19604.6	22866.7	20054.6	Stress induced phosphoprotein 1 OS=Oryctolagus cuniculus OX=9986 GN=STIP1 PE=4 SV=2	0.946002	-0.0800849	0.550959
G1T9Z7	2453.2	1937.7	1990.5	2115.9	2345.9	1309.4	Tetraspanin OS=Oryctolagus cuniculus OX=9986 GN=TSPAN14 PE=3 SV=2	0.904378	-0.145002	0.596707
O77768	21883.2	17289	17628.2	21810.4	19942.1	33072.9	Heterogeneous nuclear ribonucleoprotein C OS=Oryctolagus cuniculus OX=9986 GN=HNRNPC PE=2 SV=1	1.31734	0.397627	0.240198
G1SE30	6281.5	4964.2	5510.2	4880.5	6942.9	3951.6	Epidermal growth factor receptor pathway substrate 8 OS=Oryctolagus cuniculus OX=9986 GN=EPS8 PE=4 SV=1	0.941459	-0.0870298	0.751288
G1T5V3	9767.2	7719.1	8662.5	8757	8556.3	6247.3	RAB14, member RAS oncogene family OS=Oryctolagus cuniculus OX=9986 GN=RAB14 PE=4 SV=1	0.90102	-0.150369	0.436652
P29294	1290.3	1019.8	1059.8	1122.9	1426.3	735.7	Myosin light chain kinase, smooth muscle OS=Oryctolagus cuniculus OX=9986 GN=MYLK PE=1 SV=2	0.974777	-0.0368559	0.902374
G1SXQ0	5070.3	4007.4	4370.3	3605	5657.9	2818.4	Glutathione S-transferase OS=Oryctolagus cuniculus OX=9986 GN=GSTM3 PE=3 SV=2	0.898372	-0.154615	0.640099
G1TI70	993.7	785.4	953.4	640.3	597.5	296.5	Uncharacterized protein OS=Oryctolagus cuniculus OX=9986 GN=NPL PE=4 SV=1	0.5615	-0.832642	0.033521
G1ST01	594.5	469.9	529.7	516.7	563.1	550.3	Casein kinase I isoform delta OS=Oryctolagus cuniculus OX=9986 GN=CSNK1D PE=4 SV=1	1.02258	0.0322179	0.771117
G1TYY5	6830.9	5401.7	6101.9	5469	5831.7	3672.9	LIM and SH3 domain protein 1 OS=Oryctolagus cuniculus OX=9986 GN=LASP1 PE=4 SV=1	0.81669	-0.29214	0.226541
G1SRM2	634.6	501.9	551	539.3	509.8	684	SRSF protein kinase 2 OS=Oryctolagus cuniculus OX=9986 GN=SRPK2 PE=4 SV=2	1.02702	0.0384671	0.829954
U3KPA0	503.4	398.3	451.7	343.2	405.1	264.3	Translin associated factor X OS=Oryctolagus cuniculus OX=9986 GN=TSNAX PE=4 SV=1	0.74819	-0.418523	0.088995
G1SNY5	4769	3773.2	4089.3	3690.5	4002.5	3117.1	Sorting nexin 1 OS=Oryctolagus cuniculus OX=9986 GN=SNX1 PE=4 SV=1	0.855805	-0.224646	0.196197
G1SF95	5325.7	4214.7	4868.2	6035.5	5744.7	7143.3	Heterogeneous nuclear ribonucleoprotein D OS=Oryctolagus cuniculus OX=9986 GN=HNRNPD PE=4 SV=1	1.31335	0.393249	0.047988
G1SKL7	10545.8	8348.2	9509.9	8415.4	7569.1	7250	Vesicle amine transport 1 OS=Oryctolagus cuniculus OX=9986 GN=VAT1 PE=4 SV=1	0.818004	-0.28982	0.075916
G1T3D7	7096.3	5617.8	6793.5	5735.4	9308.9	4847.1	Uncharacterized protein OS=Oryctolagus cuniculus OX=9986 GN=NANS PE=4 SV=1	1.01967	0.028108	0.933301
G1TP57	4604.8	3645.7	3802.8	3689.8	4122.9	3963.9	Formin homology 2 domain containing 1 OS=Oryctolagus cuniculus OX=9986 GN=FHOD1 PE=4 SV=1	0.977044	-0.0335046	0.78928
G1SS96	144.5	114.5	177	124.6	141.9	160.8	Kinase suppressor of ras 1 OS=Oryctolagus cuniculus OX=9986 GN=KSR1 PE=4 SV=1	0.980046	-0.0290786	0.896131
G1SW10	7653	6059.9	7297.4	7197.7	6692.8	4982.8	Metastasis associated 1 family member 2 OS=Oryctolagus cuniculus OX=9986 GN=MTA2 PE=4 SV=1	0.898288	-0.15475	0.437103
G1TPN3	16503.2	13068.3	13998.9	18060.2	17414.4	20915	Heterogeneous nuclear ribonucleoprotein A/B OS=Oryctolagus cuniculus OX=9986 GN=HNRNPAB PE=4 SV=1	1.29422	0.372081	0.045231
P35344	161.6	128	145.8	167.6	192	147.8	C-X-C chemokine receptor type 2 OS=Oryctolagus cuniculus OX=9986 GN=CXCR2 PE=2 SV=1	1.16536	0.220782	0.209137
G1U492	4633	3669.7	2671.9	2973.2	2757.5	2572.1	Arachidonate 12-lipoxygenase, 12S type OS=Oryctolagus cuniculus OX=9986 GN=ALOX12 PE=3 SV=1	0.756547	-0.402498	0.19814
G1TL06	15844	12553.8	13886	14013.9	11983.9	18279.9	Uncharacterized protein OS=Oryctolagus cuniculus OX=9986 GN=RPL3 PE=1 SV=1	1.04716	0.066475	0.766058
G1SMS5	1518.6	1203.3	1301.6	1322.5	1525.7	1459.9	G protein subunit alpha z OS=Oryctolagus cuniculus OX=9986 GN=GNAZ PE=4 SV=1	1.07073	0.0986001	0.439849
G1TQX5	363.4	287.9	368	347.3	325.8	567.6	Uncharacterized protein OS=Oryctolagus cuniculus OX=9986 PE=4 SV=1	1.21721	0.283576	0.416469
G1SHF1	1759.1	1394.3	1542.3	1333.1	1477.7	857.7	Prefoldin subunit 2 OS=Oryctolagus cuniculus OX=9986 GN=PFDN2 PE=4 SV=1	0.781247	-0.356149	0.18674
G1SGR8	144.6	114.6	129.6	90.6	122.4	65.8	ADP ribosylation factor GTPase activating protein 2 OS=Oryctolagus cuniculus OX=9986 GN=ARFGAP2 PE=4 SV=1	0.717078	-0.479798	0.118954
G1SXF1	1475.2	1169.6	1263.6	1370.8	1403.2	1765.8	NFU1 iron-sulfur cluster scaffold OS=Oryctolagus cuniculus OX=9986 GN=NFU1 PE=4 SV=1	1.16155	0.21605	0.247472
G1T8P3	5131	4069.2	4718	5396.9	4712.7	4414.4	Small nuclear ribonucleoprotein U1 subunit 70 OS=Oryctolagus cuniculus OX=9986 GN=SNRNP70 PE=4 SV=2	1.04353	0.0614665	0.658997
G1TME5	376.9	299	365.9	439.5	455.9	393.1	5'-nucleotidase domain containing 2 OS=Oryctolagus cuniculus OX=9986 GN=NT5DC2 PE=4 SV=1	1.2368	0.306615	0.055608
G1TXI0	12689.5	10067.6	11188	11054.2	12182.6	11678.2	Peptidylprolyl isomerase OS=Oryctolagus cuniculus OX=9986 GN=FKBP11 PE=3 SV=2	1.02857	0.0406442	0.715674
G1T3W9	695.7	552	670.3	737.2	713.6	973.7	ElaC ribonuclease Z 2 OS=Oryctolagus cuniculus OX=9986 GN=ELAC2 PE=4 SV=2	1.26408	0.338084	0.147273
G1SEV7	1150.1	912.6	970.9	963.2	1139	1357.1	Uncharacterized protein OS=Oryctolagus cuniculus OX=9986 GN=HYPK PE=4 SV=1	1.14033	0.189449	0.350875
O62742	8813	6993.3	8042	8437.5	9265.7	5881.5	Non-specific lipid-transfer protein OS=Oryctolagus cuniculus OX=9986 GN=SCP2 PE=1 SV=1	0.988947	-0.0160349	0.942612
G1T157	10199.6	8095	9036	7565.2	9583.5	6897.2	Calcium binding protein 39 OS=Oryctolagus cuniculus OX=9986 GN=CAB39 PE=4 SV=2	0.879816	-0.184726	0.339809
G1T7N7	409.4	324.9	249.6	285.9	304.1	272.5	Uncharacterized protein OS=Oryctolagus cuniculus OX=9986 PE=3 SV=2	0.876613	-0.189988	0.43829
G1SLF1	9571.7	7597.9	9395.4	6837.5	8178.6	4700.6	S-(hydroxymethyl)glutathione dehydrogenase OS=Oryctolagus cuniculus OX=9986 GN=ADH5 PE=3 SV=2	0.742206	-0.430108	0.128237
U3KM54	6589.7	5231.5	5991.8	6855.3	6153.4	5382	HIV-1 Tat specific factor 1 OS=Oryctolagus cuniculus OX=9986 GN=HTATSF1 PE=4 SV=1	1.03243	0.0460454	0.756229
G1TDC8	196	155.7	219.2	233.2	217.8	179.7	Integrator complex subunit 5 OS=Oryctolagus cuniculus OX=9986 GN=INTS5 PE=4 SV=1	1.10475	0.143716	0.46039
G1SQR7	3555.7	2823.6	3002.2	2777.9	3053.4	1815.9	Nuclear transport factor 2 OS=Oryctolagus cuniculus OX=9986 GN=NUTF2 PE=4 SV=1	0.815136	-0.294887	0.254652
G1T6L0	1536.8	1220.5	1439.8	1559.8	1363.4	1252	HEAT repeat containing 1 OS=Oryctolagus cuniculus OX=9986 GN=HEATR1 PE=4 SV=2	0.994782	-0.00754769	0.957848
G1T0C1	5414.8	4301.1	5089.3	4621.2	3695.6	5930.5	Ribosomal protein L15 OS=Oryctolagus cuniculus OX=9986 GN=RPL15 PE=1 SV=1	0.962317	-0.0554159	0.810912
G1TMQ4	2185.7	1736.3	1996	2258.8	2092.6	1325	Uncharacterized protein OS=Oryctolagus cuniculus OX=9986 PE=4 SV=2	0.959175	-0.060134	0.81124
G1TDB7	239.3	190.1	205.5	193.8	193.1	271.4	BTB domain containing 9 OS=Oryctolagus cuniculus OX=9986 GN=BTBD9 PE=4 SV=2	1.03686	0.0522155	0.806259
G1SL02	32905.5	26146.9	28492.5	31145	29031.8	26451.4	AP complex subunit beta OS=Oryctolagus cuniculus OX=9986 GN=AP2B1 PE=3 SV=1	0.989529	-0.0151861	0.90489
G1TWQ3	5641.4	4484.7	5449	4918.6	5432.5	4147.3	NAD-dependent protein deacetylase OS=Oryctolagus cuniculus OX=9986 GN=SIRT2 PE=3 SV=1	0.93087	-0.103348	0.525946
G1SLQ4	25381.7	20178.5	22411.7	18944.7	24232.3	26273.5	Uncharacterized protein OS=Oryctolagus cuniculus OX=9986 GN=ACTR3 PE=3 SV=1	1.02175	0.0310465	0.861674
G1SQG5	15908.8	12647.7	13256.1	11169.7	13101	9201.9	Malate dehydrogenase OS=Oryctolagus cuniculus OX=9986 GN=MDH1 PE=3 SV=1	0.800539	-0.320956	0.13872
A7X8X3	11843.1	9421.2	10810	7807.5	9020	6486.4	Hypoxanthine phosphoribosyltransferase OS=Oryctolagus cuniculus OX=9986 GN=HPRT PE=2 SV=1	0.726872	-0.460227	0.044982
B7NZM4	3107.8	2472.3	2827.5	2287.7	2563.3	1761.5	Developmentally regulated GTP binding protein 1 (Predicted) OS=Oryctolagus cuniculus OX=9986 GN=DRG1 PE=4 SV=1	0.786491	-0.346498	0.115551
G1T459	2162.4	1720.4	1793.9	1737.1	1842.5	2153.4	Histone-lysine N-methyltransferase OS=Oryctolagus cuniculus OX=9986 GN=SETD3 PE=3 SV=2	1.00992	0.0142382	0.924178
Q9N1Q4	2102.9	1673.4	1827.7	2049	1857.5	959.3	Large neutral amino acids transporter small subunit 2 OS=Oryctolagus cuniculus OX=9986 GN=SLC7A8 PE=1 SV=1	0.868273	-0.203779	0.530319
G1SPZ7	8453.7	6727.1	7102.5	6010.6	7221.4	3983.3	Glutathione peroxidase OS=Oryctolagus cuniculus OX=9986 GN=GPX1 PE=3 SV=1	0.772565	-0.372272	0.192935
G1TC95	292.2	232.5	257.7	333.2	308.4	409.7	MAP7 domain containing 2 OS=Oryctolagus cuniculus OX=9986 GN=MAP7D2 PE=4 SV=2	1.34369	0.426196	0.062838
G1SD91	328.9	261.8	233.3	220.5	243.8	157.8	Uridine monophosphate synthetase OS=Oryctolagus cuniculus OX=9986 GN=UMPS PE=3 SV=1	0.754976	-0.405497	0.153245
G1TB74	3651.1	2906.5	3125.6	3287.5	3194.8	2920	BCL2 like 13 OS=Oryctolagus cuniculus OX=9986 GN=BCL2L13 PE=4 SV=2	0.970991	-0.0424702	0.723842
G1TTB5	7297.2	5810.5	6639.9	7123.7	6646.9	4804.8	Serine and arginine rich splicing factor 4 OS=Oryctolagus cuniculus OX=9986 GN=SRSF4 PE=4 SV=1	0.940641	-0.0882839	0.661435
G1SQX0	158.8	126.5	154.4	153.5	157.6	134.6	Aftiphilin OS=Oryctolagus cuniculus OX=9986 GN=AFTPH PE=4 SV=2	1.01365	0.0195539	0.879173
G1SGQ6	1212	965.3	1040.7	1049.6	1230.6	800.3	Protein tyrosine phosphatase type IVA, member 2 OS=Oryctolagus cuniculus OX=9986 GN=PTP4A2 PE=4 SV=1	0.957272	-0.0629992	0.767003
G1SVW5	19168.2	15267.3	18252.8	17848.9	14383.7	22834.9	Uncharacterized protein OS=Oryctolagus cuniculus OX=9986 GN=RPL4 PE=1 SV=2	1.04516	0.0637183	0.78518
G1T850	4550	3625.4	4104.3	3371.9	4221.5	2211.1	Mitogen-activated protein kinase OS=Oryctolagus cuniculus OX=9986 GN=MAPK14 PE=4 SV=2	0.798432	-0.324759	0.267418
G1TAS9	1922.2	1531.6	1763.3	1810	1824.4	1038.2	Uncharacterized protein OS=Oryctolagus cuniculus OX=9986 GN=NHP2 PE=4 SV=1	0.895632	-0.159022	0.55671
G1SYL8	2581.1	2056.9	2087.3	1844.4	2216.7	1809.1	Uncharacterized protein OS=Oryctolagus cuniculus OX=9986 PE=4 SV=2	0.872853	-0.196189	0.254001
G1T8U2	3574.3	2849.2	3401.1	3194.9	3863.7	4238.1	GDP-mannose 4,6-dehydratase OS=Oryctolagus cuniculus OX=9986 GN=GMDS PE=3 SV=1	1.14984	0.201431	0.261198
G1SIP7	2645.1	2108.9	2466.7	2217.6	2466.8	1863.7	Cyclin G associated kinase OS=Oryctolagus cuniculus OX=9986 GN=GAK PE=4 SV=2	0.906851	-0.141063	0.39503
G1U001	4440.5	3540.5	3990.2	3664.3	4958	3109.8	Uncharacterized protein OS=Oryctolagus cuniculus OX=9986 GN=LOC100352574 PE=1 SV=1	0.980027	-0.0291066	0.901728
G1TN01	526.6	420.1	483.1	475.4	418.8	378.6	DExD-box helicase 50 OS=Oryctolagus cuniculus OX=9986 GN=DDX50 PE=4 SV=1	0.890194	-0.167808	0.278412
G1U7L4	66687.1	53200.6	56065.1	62897.8	60046.7	116156	Heat shock protein family A (Hsp70) member 5 OS=Oryctolagus cuniculus OX=9986 GN=HSPA5 PE=3 SV=1	1.35889	0.442431	0.323335
G1T1P9	120.8	96.4	120.6	109.9	117.7	136.2	RNA binding motif protein 5 OS=Oryctolagus cuniculus OX=9986 GN=RBM5 PE=4 SV=1	1.07697	0.106977	0.483849
G1TZ21	114.3	91.2	104.6	115.1	100.2	163.8	Sorting nexin 14 OS=Oryctolagus cuniculus OX=9986 GN=SNX14 PE=4 SV=1	1.22251	0.289845	0.321327
G1SSL0	8635.6	6890.9	7436.6	7788.7	8431.8	11803.5	Endoplasmic reticulum resident protein 29 OS=Oryctolagus cuniculus OX=9986 GN=ERP29 PE=4 SV=1	1.22039	0.287346	0.278785
G1T511	6153	4911.5	5622.6	6028	6035	4015.8	Pre-mRNA processing factor 40 homolog A OS=Oryctolagus cuniculus OX=9986 GN=PRPF40A PE=4 SV=1	0.963547	-0.0535731	0.803343
P21195	51393.8	41025.1	43402.2	48044.6	44731.1	90161	Protein disulfide-isomerase OS=Oryctolagus cuniculus OX=9986 GN=P4HB PE=2 SV=1	1.34689	0.429637	0.352897
G1SWN4	887.5	708.4	838.4	609.7	783.6	323.3	Ubiquitin conjugating enzyme E2 Z OS=Oryctolagus cuniculus OX=9986 GN=UBE2Z PE=4 SV=1	0.705172	-0.503953	0.173005
G1SU42	6049.2	4829.2	5592.2	4752.8	4963.3	3306.9	Signal transducer and activator of transcription OS=Oryctolagus cuniculus OX=9986 GN=STAT6 PE=3 SV=1	0.790682	-0.338831	0.142485
G1SK25	6108.9	4877.4	5379.2	4791.9	5480.7	3604.6	Protein kinase cAMP-activated catalytic subunit beta OS=Oryctolagus cuniculus OX=9986 GN=PRKACB PE=3 SV=2	0.847955	-0.23794	0.273655
G1U6Y3	170.8	136.4	139.4	168.9	182.9	163.7	TBC/LysM-associated domain containing 1 OS=Oryctolagus cuniculus OX=9986 GN=TLDC1 PE=4 SV=1	1.15428	0.206989	0.13777
G1SYC3	60.9	48.6	59.4	55.3	52	65.6	Uncharacterized protein OS=Oryctolagus cuniculus OX=9986 GN=FBXL8 PE=4 SV=1	1.02368	0.033769	0.824662
G1SNB5	181.3	144.8	202.3	183.9	236.4	220.1	Farnesyl-diphosphate farnesyltransferase 1 OS=Oryctolagus cuniculus OX=9986 GN=FDFT1 PE=4 SV=1	1.21196	0.277343	0.177878
G1T2K5	13874.5	11081.3	13256.7	13826.6	12704.4	11415.6	MYB binding protein 1a OS=Oryctolagus cuniculus OX=9986 GN=MYBBP1A PE=4 SV=2	0.993042	-0.0100734	0.939468
G1SN27	5615.6	4488.7	4858.4	4978.8	4805.2	3564.7	WASH complex subunit 4 OS=Oryctolagus cuniculus OX=9986 GN=WASHC4 PE=4 SV=1	0.892132	-0.164671	0.387414
G1SQS7	2132.4	1704.6	1684.8	2049.4	1953.9	1283.4	Calcium homeostasis modulator family member 2 OS=Oryctolagus cuniculus OX=9986 GN=CALHM2 PE=4 SV=1	0.957423	-0.0627716	0.794709
G1SQL1	404.2	323.2	353.5	336.8	365	296.8	UPF2, regulator of nonsense mediated mRNA decay OS=Oryctolagus cuniculus OX=9986 GN=UPF2 PE=4 SV=1	0.92386	-0.114254	0.423682
G1SXA5	27858.1	22278.8	26825.8	29346.5	25809.8	22680.7	Uncharacterized protein OS=Oryctolagus cuniculus OX=9986 PE=4 SV=1	1.01136	0.0162966	0.915431
G1TN54	1846.2	1476.7	1957.3	2098.9	1814	1501.2	Nipsnap homolog 1 OS=Oryctolagus cuniculus OX=9986 GN=NIPSNAP1 PE=4 SV=1	1.02536	0.0361291	0.852815
G1TAL7	5287.7	4229.4	4256.9	4778.6	4088.7	3273.7	Lymphoid restricted membrane protein OS=Oryctolagus cuniculus OX=9986 GN=LRMP PE=4 SV=2	0.881443	-0.182061	0.383919
G1SN16	5492.9	4393.7	5025.9	5178.8	5329.3	3726.7	DNA-(apurinic or apyrimidinic site) lyase OS=Oryctolagus cuniculus OX=9986 GN=APEX1 PE=3 SV=1	0.954555	-0.0670998	0.726571
G1TCI4	253.7	203	237.3	280.4	314.7	169.2	Tyrosine-protein kinase OS=Oryctolagus cuniculus OX=9986 GN=JAK2 PE=3 SV=1	1.1013	0.139204	0.639988
G1U3V0	2407.6	1926.6	2204	2399.5	2278.9	1696	Uncharacterized protein OS=Oryctolagus cuniculus OX=9986 GN=HINT2 PE=4 SV=1	0.974947	-0.0366043	0.842797
G1T5E6	15820.1	12660.4	14067.4	11800.2	13602.7	8461.5	Sorting nexin 2 OS=Oryctolagus cuniculus OX=9986 GN=SNX2 PE=4 SV=1	0.795912	-0.329319	0.17572
G1SMF4	116.5	93.2	128.6	102.2	112.5	191.9	Ubiquitin specific peptidase 25 OS=Oryctolagus cuniculus OX=9986 GN=USP25 PE=3 SV=2	1.20189	0.265307	0.492659
G1T980	562.9	450.6	527	592.1	694.7	314.2	Mitochondrial ribosomal protein L53 OS=Oryctolagus cuniculus OX=9986 GN=MRPL53 PE=4 SV=1	1.03927	0.0555747	0.873006
G1SEJ6	409.9	328.2	327.4	370.9	393.4	397	Phosphotransferase OS=Oryctolagus cuniculus OX=9986 GN=GCK PE=3 SV=1	1.08991	0.12421	0.326135
G1SRC7	264.2	211.6	279.7	236.8	208.8	115.7	FGFR1 oncogene partner OS=Oryctolagus cuniculus OX=9986 GN=FGFR1OP PE=4 SV=2	0.742952	-0.428659	0.198159
G1SLL6	279.2	223.6	286.6	301.2	307.7	232.4	Uncharacterized protein OS=Oryctolagus cuniculus OX=9986 GN=LOC100356754 PE=4 SV=2	1.06575	0.0918636	0.60917
G1SZ64	545.5	436.8	415.4	543.9	509.7	372.9	Uncharacterized protein OS=Oryctolagus cuniculus OX=9986 GN=CD68 PE=3 SV=1	1.0206	0.0294246	0.89133
A0A140TAW0	18602.3	14900.3	16995.8	18259.2	15585	11381.6	Calumenin OS=Oryctolagus cuniculus OX=9986 GN=CALU PE=4 SV=1	0.895589	-0.159091	0.482105
G1T3W7	2332.8	1868.8	1932.3	1935.7	1867.2	1967.6	Sialic acid binding Ig like lectin 1 OS=Oryctolagus cuniculus OX=9986 GN=SIGLEC1 PE=4 SV=2	0.940755	-0.088109	0.459703
G1SZD6	12777.6	10239.1	10934.5	8721.3	10742.4	6760.5	14-3-3 protein theta OS=Oryctolagus cuniculus OX=9986 GN=YWHAQ PE=3 SV=1	0.772409	-0.372563	0.134666
G1TFQ7	5309.6	4254.8	6957.4	4161.1	5024.2	2746	Uncharacterized protein OS=Oryctolagus cuniculus OX=9986 PE=4 SV=1	0.722155	-0.46962	0.211311
G1SKZ8	11907.9	9543.9	11144	10857.4	9810.4	12313.8	Ribosomal protein OS=Oryctolagus cuniculus OX=9986 GN=RPL10A PE=1 SV=2	1.01184	0.0169755	0.90445
G1T0W0	1147.2	919.6	1048	839.2	933.5	1394.4	Ring finger protein 114 OS=Oryctolagus cuniculus OX=9986 GN=RNF114 PE=4 SV=1	1.01679	0.0240232	0.928973
G1T9T7	1230.1	986.1	986.1	1026.1	1405	870	FRY microtubule binding protein OS=Oryctolagus cuniculus OX=9986 GN=FRY PE=4 SV=2	1.03085	0.0438386	0.862563
G1SRP7	2338.4	1874.5	2095.2	2112.9	2234.9	1951.4	Importin subunit alpha OS=Oryctolagus cuniculus OX=9986 GN=KPNA3 PE=3 SV=2	0.998589	-0.00203708	0.98584
G1TIU2	770.6	617.7	771.8	821.4	989.7	564.3	Uncharacterized protein OS=Oryctolagus cuniculus OX=9986 GN=TLR1 PE=3 SV=2	1.09967	0.137072	0.620284
G1SRN2	767.8	615.7	793.2	761.1	840.5	1274.8	Uncharacterized protein OS=Oryctolagus cuniculus OX=9986 PE=4 SV=1	1.32145	0.402122	0.239677
G1TRY5	8055.6	6459.8	6490	5670.6	6219.8	4162.3	Plastin 3 OS=Oryctolagus cuniculus OX=9986 GN=PLS3 PE=4 SV=2	0.764218	-0.387944	0.111163
G1TC75	454.4	364.6	412.8	397.7	395.9	374.3	BTB domain and CNC homolog 1 OS=Oryctolagus cuniculus OX=9986 GN=BACH1 PE=3 SV=2	0.948125	-0.0768508	0.474512
G1SQA2	117.1	94	100.5	107.3	120.7	140.2	Bromodomain adjacent to zinc finger domain 2A OS=Oryctolagus cuniculus OX=9986 GN=BAZ2A PE=4 SV=1	1.18164	0.240794	0.184212
G1TQB6	1309.4	1050.6	1214.8	1734.1	1041.2	598.2	Uncharacterized protein OS=Oryctolagus cuniculus OX=9986 PE=4 SV=1	0.943689	-0.0836166	0.852781
G1TP30	4268.6	3425.5	4079.8	2887.3	3526.4	2348.7	Ran GTPase activating protein 1 OS=Oryctolagus cuniculus OX=9986 GN=RANGAP1 PE=4 SV=2	0.744222	-0.426195	0.077768
G1SNU4	140.6	112.9	143.7	155.8	153.4	174.4	Integrator complex subunit 8 OS=Oryctolagus cuniculus OX=9986 GN=INTS8 PE=4 SV=2	1.21752	0.283949	0.071602
G1SI74	191.1	153.4	165	160.9	162.8	295.5	CTP synthase OS=Oryctolagus cuniculus OX=9986 GN=CTPS2 PE=3 SV=1	1.21531	0.281323	0.470501
G1SIY6	13132.5	10540.7	10695.4	12601.8	13755.9	11055.1	Tyrosine-protein kinase OS=Oryctolagus cuniculus OX=9986 GN=LYN PE=3 SV=1	1.08858	0.122441	0.426466
G1SYK3	1265.9	1016.1	1222.2	1034.7	1155.2	881.8	Mitogen-activated protein kinase kinase 4 OS=Oryctolagus cuniculus OX=9986 GN=MAP2K4 PE=3 SV=2	0.876577	-0.190047	0.26168
G1U7S4	711	570.8	669.9	762.5	781.3	561.7	Phosphoglycerate mutase OS=Oryctolagus cuniculus OX=9986 GN=PGAM2 PE=3 SV=1	1.0788	0.109431	0.564243
Q9GKX2	10232.4	8215	9601.1	10973.7	10901.8	7987.2	Dehydrogenase/reductase SDR family member 4 (Fragment) OS=Oryctolagus cuniculus OX=9986 GN=DHRS4 PE=1 SV=1	1.06468	0.0904212	0.626821
G1TD34	1398.6	1123.5	1266.3	1679.6	1059.1	1033.9	Solute carrier family 27 member 6 OS=Oryctolagus cuniculus OX=9986 GN=SLC27A6 PE=4 SV=1	0.995829	-0.00603007	0.982494
G1TQC7	2640.2	2121	2530.7	2339.8	2167.9	1792.2	Cleavage and polyadenylation specific factor 7 OS=Oryctolagus cuniculus OX=9986 GN=CPSF7 PE=4 SV=1	0.863959	-0.210965	0.21739
G1U3B2	424.4	340.9	311.9	288.1	288.5	237.3	Nucleoporin 50 OS=Oryctolagus cuniculus OX=9986 GN=NUP50 PE=4 SV=2	0.75557	-0.404363	0.080781
G1TU38	675.6	542.9	577.9	716.8	668.8	587.4	Regulator of microtubule dynamics 1 OS=Oryctolagus cuniculus OX=9986 GN=RMDN1 PE=4 SV=2	1.09831	0.135283	0.343207
G1TVP3	5713.9	4592.3	4970.4	4534.9	5098.8	3281.6	Uncharacterized protein OS=Oryctolagus cuniculus OX=9986 GN=LOC100348853 PE=3 SV=1	0.84543	-0.242243	0.279663
G1SL22	396	318.4	497.1	479.4	411.8	126.3	Uncharacterized protein OS=Oryctolagus cuniculus OX=9986 PE=4 SV=2	0.839868	-0.251765	0.618383
G1SGB7	6435.2	5174.4	5730.9	6546.9	6329.5	6145.8	Mago homolog, exon junction complex subunit OS=Oryctolagus cuniculus OX=9986 GN=MAGOH PE=4 SV=1	1.09698	0.133539	0.216913
G1U5Z2	1337.1	1075.2	1250.6	1894.6	1548.3	1060.2	Thymidine kinase 2, mitochondrial OS=Oryctolagus cuniculus OX=9986 GN=TK2 PE=4 SV=1	1.22938	0.297932	0.332057
G1SPH4	2023.8	1627.6	1690.5	1661.6	1855.2	1657.3	Uncharacterized protein OS=Oryctolagus cuniculus OX=9986 GN=HSPE1 PE=4 SV=1	0.968588	-0.046045	0.708323
G1TNB4	3452.6	2777.3	2475.1	2371.1	3091.9	2208.1	Poly [ADP-ribose] polymerase OS=Oryctolagus cuniculus OX=9986 GN=PARP3 PE=4 SV=1	0.881229	-0.182411	0.433809
G1SEE0	449.6	361.7	392.9	388.9	393.7	297	Uncharacterized protein OS=Oryctolagus cuniculus OX=9986 PE=4 SV=2	0.896529	-0.157578	0.364605
G1TAI8	2680.7	2156.4	2328.5	2205.4	2356.1	1691.5	DNA helicase OS=Oryctolagus cuniculus OX=9986 GN=MCM2 PE=3 SV=1	0.872642	-0.196538	0.296411
G1SKY8	295.3	237.6	308.9	280.7	283.3	270.5	Transmembrane protein 230 OS=Oryctolagus cuniculus OX=9986 GN=TMEM230 PE=4 SV=1	0.991328	-0.0125656	0.918005
G1SM46	1084.2	872.5	966.1	1012	1013.4	965.8	TRAF2 and NCK interacting kinase OS=Oryctolagus cuniculus OX=9986 GN=TNIK PE=4 SV=1	1.0234	0.033373	0.736579
G1U915	10520.8	8466.7	8302.3	9708	8475	10040.1	Myosin IG OS=Oryctolagus cuniculus OX=9986 GN=MYO1G PE=3 SV=1	1.0342	0.0485152	0.735234
G1T0L0	2622.1	2110.6	2539.4	2284.3	2331.4	1288	Peptidylprolyl isomerase G OS=Oryctolagus cuniculus OX=9986 GN=PPIG PE=4 SV=1	0.811829	-0.300752	0.291093
G1SZ44	8900.9	7166.1	9526.7	9288.7	9100.6	7932.4	Uncharacterized protein OS=Oryctolagus cuniculus OX=9986 GN=HSPE1 PE=3 SV=1	1.02845	0.0404646	0.782957
G1U328	2083.1	1677.3	1879.1	1462.1	1957.6	792	Uncharacterized protein OS=Oryctolagus cuniculus OX=9986 PE=4 SV=2	0.746822	-0.421164	0.253875
G1T970	13339.4	10741.8	11758	13691	14314.5	12326.2	Aldehyde dehydrogenase 4 family member A1 OS=Oryctolagus cuniculus OX=9986 GN=ALDH4A1 PE=3 SV=2	1.12535	0.170376	0.192689
G1U840	7273.6	5857.3	6401	6382.2	6897.4	4299.6	Serine/threonine kinase 24 OS=Oryctolagus cuniculus OX=9986 GN=STK24 PE=4 SV=1	0.900025	-0.151963	0.507287
G1SWD1	6046.5	4870.5	5682.8	5526.9	5255.3	8008.3	Fibrillarin OS=Oryctolagus cuniculus OX=9986 GN=FBL PE=3 SV=1	1.13197	0.178837	0.481664
G1SCF4	9700.9	7814.6	8684.5	7549.7	8441.9	5865.5	Dynamin 1 like OS=Oryctolagus cuniculus OX=9986 GN=DNM1L PE=3 SV=2	0.83424	-0.261466	0.195129
G1SK49	1908.8	1537.9	1637	2094.8	2070.6	3992.2	Secretory carrier-associated membrane protein OS=Oryctolagus cuniculus OX=9986 GN=SCAMP2 PE=3 SV=2	1.60466	0.682266	0.187963
G1TDB9	401.5	323.5	363.1	408.8	424.9	356.2	Uncharacterized protein OS=Oryctolagus cuniculus OX=9986 PE=4 SV=1	1.09356	0.12903	0.329866
G1U222	1065.1	858.5	1014.6	889.2	929.4	491.8	Rho guanine nucleotide exchange factor 10 like OS=Oryctolagus cuniculus OX=9986 GN=ARHGEF10L PE=4 SV=2	0.786332	-0.34679	0.242857
G1T9G4	1981.2	1597.8	1950.7	1817.6	1947.5	1591.3	Sorting nexin 4 OS=Oryctolagus cuniculus OX=9986 GN=SNX4 PE=4 SV=2	0.96866	-0.0459377	0.738108
G1SVJ5	9474	7641.2	8258.5	6462.9	8615.9	5560.9	Serine--tRNA ligase, cytoplasmic OS=Oryctolagus cuniculus OX=9986 GN=SARS PE=4 SV=1	0.813429	-0.297912	0.20873
G1TSM9	136.6	110.2	142.2	126.8	114.1	98.7	Proline rich coiled-coil 2A OS=Oryctolagus cuniculus OX=9986 GN=PRRC2A PE=4 SV=1	0.873008	-0.195933	0.26709
P41035	7091.7	5720.7	5832.4	6032.2	6227.8	5222.9	Eukaryotic translation initiation factor 2 subunit 2 OS=Oryctolagus cuniculus OX=9986 GN=EIF2S2 PE=1 SV=1	0.937682	-0.0928294	0.510302
G1TAH8	279.4	225.4	248.8	200.5	227.9	140.7	Non-specific serine/threonine protein kinase OS=Oryctolagus cuniculus OX=9986 GN=AKT3 PE=3 SV=1	0.755175	-0.405117	0.110718
G1T6I6	26318.9	21231.8	22206.1	27457.3	24442.4	25119.3	Interleukin enhancer binding factor 3 OS=Oryctolagus cuniculus OX=9986 GN=ILF3 PE=4 SV=1	1.10411	0.14288	0.251349
G1SHF9	452.2	364.8	397.3	328.9	387.4	149.9	Ubiquitin-fold modifier-conjugating enzyme 1 OS=Oryctolagus cuniculus OX=9986 GN=UFC1 PE=3 SV=1	0.713333	-0.487352	0.200848
G1T275	4673.5	3770.8	4193.2	3459.3	3722.9	3083	Uncharacterized protein OS=Oryctolagus cuniculus OX=9986 GN=ZC3H15 PE=4 SV=1	0.812281	-0.299949	0.068928
G1U0Q2	8549.5	6898.6	7197.8	7456.3	7092.6	5947	Uncharacterized protein OS=Oryctolagus cuniculus OX=9986 GN=LOC103349305 PE=1 SV=1	0.90506	-0.143915	0.352437
G1SL68	158592	127969	130151	138462	159299	218427	Myosin heavy chain 9 OS=Oryctolagus cuniculus OX=9986 GN=MYH9 PE=3 SV=1	1.23871	0.308843	0.269685
G1SGG2	6821.8	5505.3	6585.4	5580.8	6176.7	4997	Rho/Rac guanine nucleotide exchange factor 2 OS=Oryctolagus cuniculus OX=9986 GN=ARHGEF2 PE=4 SV=1	0.885896	-0.174791	0.245733
G1TZJ9	755	609.6	798.8	719	651.5	795.7	Uncharacterized protein OS=Oryctolagus cuniculus OX=9986 GN=LSM14A PE=4 SV=1	1.00129	0.00186564	0.990106
G1TL29	702.9	567.5	736.5	629.7	671.5	486.1	40S ribosomal protein S27 OS=Oryctolagus cuniculus OX=9986 GN=LOC108178683 PE=3 SV=1	0.890578	-0.167186	0.391647
G1SU04	1074.4	867.5	975.4	799.6	947.7	748.4	Family with sequence similarity 49 member A OS=Oryctolagus cuniculus OX=9986 GN=FAM49A PE=4 SV=1	0.855483	-0.225189	0.171625
G1SED5	343.6	277.4	275.1	377.1	335.6	258.5	Palmitoyltransferase OS=Oryctolagus cuniculus OX=9986 GN=ZDHHC3 PE=3 SV=1	1.08381	0.116109	0.577793
G1TC10	2877.2	2323.3	2439	2103.7	2668.9	1898.7	Ubiquitin conjugating enzyme E2 M OS=Oryctolagus cuniculus OX=9986 GN=UBE2M PE=3 SV=1	0.873264	-0.19551	0.321448
G1T5H2	1684.8	1360.6	1605.3	1592.3	1604.5	1094.5	5'-3' exoribonuclease OS=Oryctolagus cuniculus OX=9986 GN=XRN2 PE=3 SV=1	0.922721	-0.116034	0.570828
U3KLT5	7648.5	6177.7	7032.5	5859.5	6871.8	4065.8	Uncharacterized protein OS=Oryctolagus cuniculus OX=9986 GN=EIF5B PE=4 SV=1	0.80528	-0.312438	0.216986
G1U8F0	16767.7	13550	15845.2	17083.2	15664	14751.1	AP-2 complex subunit alpha OS=Oryctolagus cuniculus OX=9986 GN=AP2A1 PE=3 SV=1	1.02893	0.041142	0.723574
G1U407	5712.4	4616.7	4662.6	4450.3	5300.1	4613.2	Potassium voltage-gated channel subfamily A regulatory beta subunit 2 OS=Oryctolagus cuniculus OX=9986 GN=KCNAB2 PE=4 SV=1	0.958103	-0.0617473	0.660807
G1TJN8	12916.1	10439.4	11147.2	13195.9	12667.9	13710.2	Synaptotagmin binding cytoplasmic RNA interacting protein OS=Oryctolagus cuniculus OX=9986 GN=SYNCRIP PE=4 SV=1	1.14698	0.197844	0.100805
G1SF19	232.7	188	310.8	244	229.7	207.1	Transmembrane and coiled-coil domain family 2 OS=Oryctolagus cuniculus OX=9986 GN=TMCC2 PE=4 SV=1	0.93069	-0.103627	0.675235
G1TFV2	254.6	205.9	249.5	181.7	203.9	121	TGF-beta activated kinase 1 (MAP3K7) binding protein 1 OS=Oryctolagus cuniculus OX=9986 GN=TAB1 PE=4 SV=1	0.713521	-0.486972	0.080972
G1SE70	2483.5	2008.3	2421.8	2199.6	2189.2	1682.6	RAB11 family interacting protein 5 OS=Oryctolagus cuniculus OX=9986 GN=RAB11FIP5 PE=4 SV=2	0.878182	-0.187408	0.283202
G1SQX6	653.9	528.7	626	660	600.2	1894.8	Phosphotyrosine interaction domain containing 1 OS=Oryctolagus cuniculus OX=9986 GN=PID1 PE=4 SV=1	1.74444	0.802766	0.349137
G1SIU6	1909.7	1544.4	1674.1	1696	1521.8	974	Translocase of outer mitochondrial membrane 34 OS=Oryctolagus cuniculus OX=9986 GN=TOMM34 PE=4 SV=1	0.817402	-0.290882	0.267279
G1U389	210.2	170	215.1	202.6	1740	133.3	Uncharacterized protein OS=Oryctolagus cuniculus OX=9986 PE=4 SV=1	3.48715	1.80205	0.400078
G1TJG3	8334.6	6740.7	7727	8269.8	8279.4	5223.9	Uncharacterized protein OS=Oryctolagus cuniculus OX=9986 PE=4 SV=1	0.954864	-0.0666328	0.774251
G1U194	3057.8	2473.5	2993	3207	2974.8	3892.8	LUC7 like 3 pre-mRNA splicing factor OS=Oryctolagus cuniculus OX=9986 GN=LUC7L3 PE=4 SV=2	1.18187	0.241069	0.194428
G1TXD9	15211.5	12305.5	12081.9	13697.5	16737.1	23021.3	Allograft inflammatory factor 1 OS=Oryctolagus cuniculus OX=9986 GN=AIF1 PE=4 SV=1	1.34993	0.432889	0.189393
G1T2U6	8671.1	7014.7	7845.9	8282.5	8176.8	6643.9	DEAD-box helicase 46 OS=Oryctolagus cuniculus OX=9986 GN=DDX46 PE=4 SV=2	0.981791	-0.0265122	0.851084
G1TYF4	2682.2	2170	2169.5	2531.4	2837.2	2390.2	Ecotropic viral integration site 2B OS=Oryctolagus cuniculus OX=9986 GN=EVI2B PE=4 SV=1	1.10498	0.144014	0.318506
G1SQH0	7935.2	6420	6962.8	7513.3	5921.3	11549.1	Uncharacterized protein OS=Oryctolagus cuniculus OX=9986 GN=RPL26 PE=1 SV=1	1.17195	0.228915	0.519547
G1SJK0	4759.2	3851.5	4245.7	4593.1	4252.9	2814.8	MICOS complex subunit OS=Oryctolagus cuniculus OX=9986 GN=APOOL PE=4 SV=1	0.907004	-0.140819	0.546078
G1SX03	719.7	582.4	627.9	808.9	712.5	293.2	Protein kish OS=Oryctolagus cuniculus OX=9986 GN=TMEM167A PE=3 SV=2	0.940207	-0.0889497	0.825415
G1TC53	98.1	79.4	84.7	80.1	72.5	88	Coiled-coil domain containing 97 OS=Oryctolagus cuniculus OX=9986 GN=CCDC97 PE=4 SV=1	0.91762	-0.124031	0.370338
G1SL16	4483.3	3628.4	4349.3	4388.3	4106.9	5377.6	Serine and arginine rich splicing factor 7 OS=Oryctolagus cuniculus OX=9986 GN=SRSF7 PE=4 SV=2	1.1133	0.154839	0.371449
G1SNS5	22115.9	17898.9	19621.5	14920.8	19101.5	9827.6	Rab GDP dissociation inhibitor OS=Oryctolagus cuniculus OX=9986 PE=3 SV=1	0.735289	-0.443617	0.148782
G1SX56	742.8	601.6	677.8	666.9	673.6	517.5	Uncharacterized protein OS=Oryctolagus cuniculus OX=9986 GN=TRAPPC13 PE=4 SV=1	0.918801	-0.122176	0.44895
G1T7I8	1734.3	1405.1	1634.3	1410	1365.5	1345.4	RIC8 guanine nucleotide exchange factor A OS=Oryctolagus cuniculus OX=9986 GN=RIC8A PE=4 SV=1	0.863251	-0.212148	0.093535
G1SP92	1399.2	1133.6	1336.1	1350.8	1259.3	2746.2	Zinc finger MYND-type containing 8 OS=Oryctolagus cuniculus OX=9986 GN=ZMYND8 PE=4 SV=2	1.38445	0.469313	0.366859
G1SLD5	21124.3	17119.1	19729.9	22228.4	21922.7	22379.1	Hypoxia up-regulated 1 OS=Oryctolagus cuniculus OX=9986 GN=HYOU1 PE=3 SV=1	1.1476	0.198621	0.073225
G1SDC4	339.8	275.3	292.1	257.6	264.2	257.5	Oxidation resistance 1 OS=Oryctolagus cuniculus OX=9986 GN=OXR1 PE=4 SV=2	0.859017	-0.219241	0.093435
G1TPL7	12648.7	10251.5	10230.1	8808.4	11593.2	6240.8	Dipeptidyl peptidase 3 OS=Oryctolagus cuniculus OX=9986 GN=DPP3 PE=3 SV=1	0.80417	-0.314428	0.282148
G1TEU8	343	278	334.2	245.9	250.8	265.5	Tubulin folding cofactor C OS=Oryctolagus cuniculus OX=9986 GN=TBCC PE=4 SV=1	0.797948	-0.325633	0.038572
G1SF06	14105.2	11432.2	11945.1	11096.2	13878.9	9973.6	EH domain containing 3 OS=Oryctolagus cuniculus OX=9986 GN=EHD3 PE=3 SV=1	0.9324	-0.100979	0.584166
G1T5R4	1863.8	1510.8	1656.3	2132	1736.3	2871.6	CD302 molecule OS=Oryctolagus cuniculus OX=9986 GN=CD302 PE=4 SV=1	1.3397	0.421911	0.177091
G1SPE9	3588.4	2908.7	3360.8	3303.4	3581.7	2980.5	Dihydroxyacetone phosphate acyltransferase OS=Oryctolagus cuniculus OX=9986 GN=GNPAT PE=3 SV=2	1.00078	0.00112631	0.992728
G1T524	13786.7	11176.2	11812.7	13664.6	15300.4	35672.8	Solute carrier family 25 member 5 OS=Oryctolagus cuniculus OX=9986 GN=SLC25A5 PE=3 SV=1	1.75763	0.813629	0.262237
G1TF51	1725	1398.4	1523.1	1542.8	1453.9	1864	Zinc finger E-box binding homeobox 2 OS=Oryctolagus cuniculus OX=9986 GN=ZEB2 PE=4 SV=2	1.0461	0.0650194	0.672367
G1TAR0	1744.1	1413.9	1718.8	1634.5	1510.4	1125.2	Ribosome production factor 2 homolog OS=Oryctolagus cuniculus OX=9986 GN=RPF2 PE=4 SV=1	0.875595	-0.191664	0.339097
G1SUI3	2283.1	1851.2	2229.1	2387.2	2717.6	1882.5	CD274 molecule OS=Oryctolagus cuniculus OX=9986 GN=CD274 PE=4 SV=1	1.09804	0.134937	0.496348
G1SF32	17778	14415.3	16796.7	16648	16173.9	11839.1	Translocase of outer mitochondrial membrane 70 OS=Oryctolagus cuniculus OX=9986 GN=TOMM70 PE=4 SV=2	0.911635	-0.133472	0.473818
G1SDI1	1384.4	1122.7	1216.7	1076.2	1294.7	731.1	Lymphocyte cytosolic protein 2 OS=Oryctolagus cuniculus OX=9986 GN=LCP2 PE=4 SV=1	0.83302	-0.263577	0.316101
G1SEV2	46699	37872.5	44441.1	47318	43649.7	106673	Protein disulfide-isomerase OS=Oryctolagus cuniculus OX=9986 GN=PDIA3 PE=3 SV=2	1.53195	0.615365	0.328934
G1SFW9	10409.2	8442	9561	9151.1	8992.9	7788.2	Apoptotic chromatin condensation inducer 1 OS=Oryctolagus cuniculus OX=9986 GN=ACIN1 PE=4 SV=1	0.912714	-0.131765	0.311347
G1T2S7	673.9	546.7	550.1	744.9	637.9	684.5	Acyl-CoA thioesterase 8 OS=Oryctolagus cuniculus OX=9986 GN=ACOT8 PE=4 SV=1	1.1675	0.223427	0.130382
G1SKM9	504.6	409.4	520.2	410.5	436.4	555	Uncharacterized protein OS=Oryctolagus cuniculus OX=9986 GN=PLA2G12A PE=3 SV=1	0.977479	-0.0328624	0.857833
G1SW40	6318.3	5128.8	5454.4	5067.1	5902.6	4883.4	Switching B cell complex subunit SWAP70 OS=Oryctolagus cuniculus OX=9986 GN=SWAP70 PE=4 SV=1	0.93797	-0.0923863	0.50155
G1TI97	3349.9	2719.3	3087	3676.4	3361.3	4225.7	THO complex 5 OS=Oryctolagus cuniculus OX=9986 GN=THOC5 PE=4 SV=2	1.23014	0.298821	0.087396
G1SLB5	8494	6895.9	7394.3	9287.1	8284	11632.6	Monocyte differentiation antigen CD14 OS=Oryctolagus cuniculus OX=9986 GN=CD14 PE=4 SV=1	1.28175	0.358117	0.12332
G1SPB8	8576.2	6963.1	7255.4	6721.8	7301.1	4313.9	Nucleosome assembly protein 1 like 4 OS=Oryctolagus cuniculus OX=9986 GN=NAP1L4 PE=3 SV=1	0.804433	-0.313956	0.226458
G1SR37	337.7	274.3	307.2	293.7	292	394.5	Uncharacterized protein OS=Oryctolagus cuniculus OX=9986 GN=WDR89 PE=4 SV=1	1.06636	0.0926973	0.62548
G1SEH9	905.6	735.5	1033.4	786.2	1091.6	546.1	Hypoxia inducible factor 1 subunit alpha inhibitor OS=Oryctolagus cuniculus OX=9986 GN=HIF1AN PE=4 SV=2	0.9063	-0.141939	0.666542
G1U1T9	130	105.6	167.4	123.7	94.8	68	Sorbin and SH3 domain containing 3 OS=Oryctolagus cuniculus OX=9986 GN=SORBS3 PE=4 SV=1	0.710918	-0.492245	0.18264
G1TKE0	195.2	158.6	170.1	229.8	203.6	162.9	Dolichyl-phosphate mannosyltransferase subunit 3 OS=Oryctolagus cuniculus OX=9986 GN=DPM3 PE=4 SV=1	1.13819	0.186746	0.339301
G1TXN8	7663.6	6225.9	6655.5	6271.8	5501.9	3218.1	Leupaxin OS=Oryctolagus cuniculus OX=9986 GN=LPXN PE=4 SV=1	0.729706	-0.454613	0.141102
G1SWZ3	758.1	615.9	675.7	744.5	844.2	516.8	CD84 molecule OS=Oryctolagus cuniculus OX=9986 GN=CD84 PE=4 SV=2	1.02722	0.0387494	0.868369
G1SCR0	3078.1	2501.8	2634.3	3298.5	3134.8	2912.7	Late endosomal/lysosomal adaptor, MAPK and MTOR activator 1 OS=Oryctolagus cuniculus OX=9986 GN=LAMTOR1 PE=4 SV=1	1.13779	0.186229	0.142518
G1T249	5104.9	4149.2	4664.6	4314	4444.3	3782.2	Apoptotic peptidase activating factor 1 OS=Oryctolagus cuniculus OX=9986 GN=APAF1 PE=4 SV=2	0.900982	-0.15043	0.250867
G1SVR2	1527.8	1242	1289.5	1412.1	1468.9	837.7	YTH N6-methyladenosine RNA binding protein 3 OS=Oryctolagus cuniculus OX=9986 GN=YTHDF3 PE=4 SV=1	0.916094	-0.126432	0.633235
G1SX00	7248.7	5893.2	6589.5	7014.4	6149.7	6556.6	PC4 and SFRS1 interacting protein 1 OS=Oryctolagus cuniculus OX=9986 GN=PSIP1 PE=4 SV=1	0.999458	-0.000782153	0.994238
G1U0B4	2971.3	2415.8	2848.8	3464.7	3993	2200.4	Uncharacterized protein OS=Oryctolagus cuniculus OX=9986 GN=LOC100357329 PE=3 SV=1	1.17268	0.229813	0.443323
G1T0D0	474.2	385.5	471.5	498.5	479.6	511	Sphingomyelin synthase 1 OS=Oryctolagus cuniculus OX=9986 GN=SGMS1 PE=4 SV=1	1.11861	0.161714	0.159735
G1T726	14015	11395.6	14126.5	15381	12984.2	18069.7	Hydroxyacyl-CoA dehydrogenase OS=Oryctolagus cuniculus OX=9986 GN=HADH PE=4 SV=2	1.17446	0.232002	0.251946
G1TGY9	3174.7	2582.2	2985	3017.3	2830.6	2618.9	VPS11, CORVET/HOPS core subunit OS=Oryctolagus cuniculus OX=9986 GN=VPS11 PE=4 SV=2	0.968531	-0.0461299	0.683762
G1SQ80	4703.6	3825.9	4382.8	4270.1	5056	4426.8	Microtubule associated monooxygenase, calponin and LIM domain containing 1 OS=Oryctolagus cuniculus OX=9986 GN=MICAL1 PE=4 SV=1	1.0651	0.0909902	0.469774
G1T6R1	415.7	338.1	348.1	359	363	268	VPS26 endosomal protein sorting factor C OS=Oryctolagus cuniculus OX=9986 GN=VPS26C PE=4 SV=1	0.898448	-0.154493	0.397941
G1SQT2	1492.8	1214.4	1438.8	1300.7	1269.3	1154.5	Enhancer of mRNA decapping 4 OS=Oryctolagus cuniculus OX=9986 GN=EDC4 PE=4 SV=2	0.898336	-0.154673	0.217644
G1SS95	219.4	178.5	206.9	215.4	226.5	162.7	SDS3 homolog, SIN3A corepressor complex component OS=Oryctolagus cuniculus OX=9986 GN=SUDS3 PE=4 SV=2	0.999669	-0.000477611	0.997836
G1U3T2	1599.5	1301.3	1522.9	1257.8	1122.3	913.9	MAP7 domain containing 1 OS=Oryctolagus cuniculus OX=9986 GN=MAP7D1 PE=4 SV=2	0.744626	-0.425412	0.048467
G1T1I0	792.6	644.9	756.2	875.1	850.4	564.1	T-lymphocyte activation antigen CD86 OS=Oryctolagus cuniculus OX=9986 GN=CD86 PE=4 SV=2	1.04372	0.0617292	0.784371
G1T1X4	2253	1833.4	1975.8	2159	2085.5	1297.3	Pre-mRNA processing factor 3 OS=Oryctolagus cuniculus OX=9986 GN=PRPF3 PE=4 SV=1	0.914157	-0.129486	0.596535
G1SUA9	1372	1116.5	1144.2	1354.5	1303.2	720.4	DEAH-box helicase 8 OS=Oryctolagus cuniculus OX=9986 GN=DHX8 PE=4 SV=2	0.929914	-0.104831	0.717957
G1SWR1	1188.1	967.1	1130.6	1245.9	1222.8	1223.6	Ribosomal RNA processing 9, U3 small nucleolar RNA binding protein OS=Oryctolagus cuniculus OX=9986 GN=RRP9 PE=4 SV=2	1.12371	0.168275	0.11175
G1SY91	149.9	122.1	158.5	154.9	126.7	52.6	CCR4-NOT transcription complex subunit 2 OS=Oryctolagus cuniculus OX=9986 GN=CNOT2 PE=4 SV=2	0.776307	-0.365301	0.378206
G1T3N8	2661.4	2167.6	2560.9	2457	2750.9	1556	Aminoacyl tRNA synthetase complex interacting multifunctional protein 2 OS=Oryctolagus cuniculus OX=9986 GN=AIMP2 PE=4 SV=2	0.91529	-0.127699	0.620782
G1TS87	1196.1	974.2	1016.3	1155.3	1382.6	1701.9	Synaptogyrin OS=Oryctolagus cuniculus OX=9986 GN=SYNGR2 PE=3 SV=2	1.33051	0.411978	0.111583
G1SVP9	4630.2	3771.8	3875.8	4900	4386.2	3544.3	Poly(A) binding protein nuclear 1 OS=Oryctolagus cuniculus OX=9986 GN=PABPN1 PE=4 SV=1	1.04502	0.063525	0.720015
G1T7D5	2893.6	2357.5	2670.6	2713.4	3034	2387.5	IKAROS family zinc finger 1 OS=Oryctolagus cuniculus OX=9986 GN=IKZF1 PE=4 SV=2	1.02691	0.038314	0.784407
G1TYA7	24685.8	20114	19157.5	15554.7	17176.8	25180.9	L-lactate dehydrogenase OS=Oryctolagus cuniculus OX=9986 GN=LDHB PE=3 SV=2	0.905485	-0.143237	0.588435
G1TDQ2	2491.4	2030.1	2323.4	1851.8	2257.1	1966.3	Prefoldin subunit 3 OS=Oryctolagus cuniculus OX=9986 PE=3 SV=1	0.887551	-0.172098	0.229077
G1SNL4	1007.1	820.7	898.3	1023	1166.1	942.2	Ubiquitin conjugating enzyme E2 J1 OS=Oryctolagus cuniculus OX=9986 GN=UBE2J1 PE=4 SV=1	1.14864	0.199923	0.18684
G1T3G8	1292.5	1053.3	1192.8	1292.6	1346.8	1180.3	Elongation factor Ts, mitochondrial OS=Oryctolagus cuniculus OX=9986 GN=TSFM PE=3 SV=2	1.07944	0.11028	0.331908
G1T6T8	2292	1867.9	2185.7	2433.5	2138.8	1921.1	Pre-mRNA processing factor 6 OS=Oryctolagus cuniculus OX=9986 GN=PRPF6 PE=4 SV=1	1.02329	0.0332179	0.813587
G1TB50	1900.4	1548.9	1533	1469.7	2053.1	4195	Syndecan binding protein OS=Oryctolagus cuniculus OX=9986 GN=SDCBP PE=4 SV=1	1.54904	0.631378	0.337276
G1SN06	8302	6766.9	8543	8398.3	7923.4	6074.4	Acyl-CoA synthetase long chain family member 4 OS=Oryctolagus cuniculus OX=9986 GN=ACSL4 PE=4 SV=1	0.948509	-0.0762666	0.676171
G1SKE0	6808.6	5549.7	5549	4701.2	5443.7	4834.8	Microtubule associated protein RP/EB family member 2 OS=Oryctolagus cuniculus OX=9986 GN=MAPRE2 PE=4 SV=1	0.836514	-0.257538	0.110704
G1SWB5	274.4	223.7	264.8	219.1	239.6	243.5	Uncharacterized protein OS=Oryctolagus cuniculus OX=9986 PE=4 SV=1	0.920435	-0.119612	0.306938
G1T2C3	8989.7	7329.5	8063	7718.8	7506.4	5879.7	Cold shock domain containing E1 OS=Oryctolagus cuniculus OX=9986 GN=CSDE1 PE=4 SV=2	0.865586	-0.208251	0.22084
G1U8K3	3396	2768.9	3403.7	3908.5	3664.1	3449.2	ATP-dependent Clp protease proteolytic subunit OS=Oryctolagus cuniculus OX=9986 GN=CLPP PE=3 SV=1	1.15187	0.20398	0.123256
G1SD50	4336.1	3535.5	3849.7	4614.3	3923.3	2661.6	Secretory carrier-associated membrane protein OS=Oryctolagus cuniculus OX=9986 GN=CLK2 PE=3 SV=2	0.955457	-0.0657371	0.791979
G1T601	3391.3	2765.1	3567.3	3433.9	3335.4	3300.4	Citrate lyase beta like OS=Oryctolagus cuniculus OX=9986 GN=CLYBL PE=4 SV=2	1.03558	0.0504432	0.664455
G1TBI4	1528.5	1246.4	1316.2	1052.1	1385.3	734.6	BRO1 domain and CAAX motif containing OS=Oryctolagus cuniculus OX=9986 GN=BROX PE=4 SV=1	0.775342	-0.367095	0.211388
G1TKE8	3535.4	2883.1	3238.8	3586.8	3551.5	3045	Uncharacterized protein OS=Oryctolagus cuniculus OX=9986 GN=LOC100357845 PE=4 SV=1	1.05447	0.0765139	0.532951
G1ST34	240.8	196.4	211.5	227.3	228.8	290.9	Uncharacterized protein OS=Oryctolagus cuniculus OX=9986 PE=4 SV=1	1.15153	0.203557	0.254947
G1SQR6	458	373.7	591.7	399.2	722.7	384.1	Calponin OS=Oryctolagus cuniculus OX=9986 GN=CNN3 PE=3 SV=1	1.05803	0.0813805	0.839439
G1U6D0	3990.1	3255.4	3526	3243.3	3746.7	2796	GTP binding protein 1 OS=Oryctolagus cuniculus OX=9986 GN=GTPBP1 PE=4 SV=1	0.908509	-0.138427	0.39921
G1TRF8	1379.8	1126	1188.1	1409	1436.7	949.2	TGIF2-RAB5IF readthrough OS=Oryctolagus cuniculus OX=9986 GN=TGIF2-RAB5IF PE=4 SV=1	1.02734	0.0389165	0.857275
G1T6F3	357.3	291.6	339.3	323.7	325.4	365	Phosphorylase kinase catalytic subunit gamma 2 OS=Oryctolagus cuniculus OX=9986 GN=PHKG2 PE=3 SV=1	1.02621	0.0373246	0.735109
G1T4Q7	859.5	701.5	827.2	842.7	822.9	570.7	Phospholipid-transporting ATPase OS=Oryctolagus cuniculus OX=9986 GN=ATP11C PE=3 SV=2	0.936396	-0.0948093	0.639065
G1T7L0	9196.8	7506.6	7976.3	9105.6	10235.3	11678.3	Cathepsin C OS=Oryctolagus cuniculus OX=9986 GN=CTSC PE=3 SV=1	1.25687	0.329837	0.078443
G1SNH3	608	496.2	540.1	583.6	637.2	513.5	Sorting nexin 20 OS=Oryctolagus cuniculus OX=9986 GN=SNX20 PE=4 SV=1	1.05473	0.0768806	0.568753
G1TBY1	10334.1	8435.2	7862.7	8645.7	9882.2	13006.1	Cathepsin B OS=Oryctolagus cuniculus OX=9986 GN=CTSB PE=3 SV=1	1.18406	0.243747	0.336406
G1TD98	4403.2	3595.1	4201.2	3628.9	4037.7	2747	Glutathione reductase OS=Oryctolagus cuniculus OX=9986 GN=GSR PE=3 SV=1	0.853609	-0.228353	0.257908
G1T7T8	10673.3	8715.3	9742	8996	10892.3	6977.2	Phospholipase A2 OS=Oryctolagus cuniculus OX=9986 GN=PLA2G4A PE=4 SV=2	0.922243	-0.116781	0.582429
G1T516	1423.6	1162.6	1296.9	1377	1355.5	1195	Interferon gamma receptor 1 OS=Oryctolagus cuniculus OX=9986 GN=IFNGR1 PE=4 SV=2	1.01143	0.0164022	0.883427
G1TS97	713.2	582.4	618	650	617.6	856.1	Y-box binding protein 3 OS=Oryctolagus cuniculus OX=9986 GN=YBX3 PE=4 SV=1	1.10979	0.150291	0.452706
G1U644	6008.7	4907.8	4568.5	4503.3	5480.1	3001	Uncharacterized protein OS=Oryctolagus cuniculus OX=9986 PE=4 SV=1	0.838515	-0.254092	0.378188
G1U9S7	21273.8	17383	18094.4	16987.3	18915.9	18919.5	Uncharacterized protein OS=Oryctolagus cuniculus OX=9986 GN=TCP1 PE=3 SV=1	0.966018	-0.049878	0.660679
G1T4L8	819.2	669.4	762.8	666.3	821.7	580.7	Ubiquitin conjugating enzyme E2 H OS=Oryctolagus cuniculus OX=9986 GN=UBE2H PE=3 SV=2	0.91885	-0.122099	0.503636
G1SKJ5	1257.6	1027.6	1095.1	1199.1	1202.5	1302.9	Uncharacterized protein OS=Oryctolagus cuniculus OX=9986 GN=SNAP29 PE=4 SV=2	1.09591	0.132128	0.229509
G1TZB2	757.3	618.8	731.2	706.9	688.7	343.9	CCR4-NOT transcription complex subunit 10 OS=Oryctolagus cuniculus OX=9986 GN=CNOT10 PE=4 SV=2	0.825464	-0.276723	0.383921
G1SCI9	14381.4	11755.2	11623.7	12430.2	13746	17004.8	Uncharacterized protein OS=Oryctolagus cuniculus OX=9986 GN=HMGB2 PE=4 SV=1	1.14356	0.193527	0.329675
G1SM63	606.6	495.9	542.7	586.5	539.7	337.5	Aph-1 homolog B, gamma-secretase subunit OS=Oryctolagus cuniculus OX=9986 GN=APH1B PE=4 SV=1	0.889679	-0.168643	0.505795
G1SVE6	2323.2	1899.2	2311.7	1787	2041	1393.9	Uncharacterized protein OS=Oryctolagus cuniculus OX=9986 PE=4 SV=1	0.799177	-0.323413	0.135282
G1T0C8	13262.4	10841.9	8014	12011.6	12824.3	8910.1	Uncharacterized protein OS=Oryctolagus cuniculus OX=9986 GN=LOC100328967 PE=3 SV=1	1.05068	0.0713206	0.79249
G1T2X0	741.2	606.1	841	1091.7	1053.8	1576.4	Perilipin OS=Oryctolagus cuniculus OX=9986 GN=PLIN2 PE=3 SV=2	1.70082	0.766229	0.047987
G1SHK2	68.8	56.3	76.6	79.2	64.9	93.4	Chromosome 7 open reading frame 26 OS=Oryctolagus cuniculus OX=9986 GN=C7orf26 PE=4 SV=2	1.17749	0.235716	0.304139
G1SXN1	1990.9	1628.5	1856	1869.6	1984.8	1725	Oxysterol-binding protein OS=Oryctolagus cuniculus OX=9986 GN=OSBPL11 PE=3 SV=2	1.01899	0.0271456	0.802519
G1T4H3	15319	12531.2	14156.3	17054.8	13170.7	17082.6	Protein disulfide isomerase family A member 6 OS=Oryctolagus cuniculus OX=9986 GN=PDIA6 PE=3 SV=2	1.12621	0.171475	0.312471
G1SLZ9	954.9	781.1	1003.5	1047.6	904	490.3	Eukaryotic translation initiation factor 4E family member 2 OS=Oryctolagus cuniculus OX=9986 GN=EIF4E2 PE=3 SV=1	0.891367	-0.165909	0.611241
G1T8F5	4182.8	3422.1	3813.1	4129.6	4540	3783.5	Spectrin repeat containing nuclear envelope family member 3 OS=Oryctolagus cuniculus OX=9986 GN=SYNE3 PE=4 SV=2	1.09065	0.125195	0.327947
G1SKS8	21386.6	17498.6	18316.4	16659.7	14923.3	10023.1	Microtubule-associated protein OS=Oryctolagus cuniculus OX=9986 GN=MAP4 PE=4 SV=2	0.727359	-0.45926	0.087868
G1T6Q9	10350.7	8469.6	8641.6	9729.2	9481.8	7913.6	Syntaxin 7 OS=Oryctolagus cuniculus OX=9986 GN=STX7 PE=3 SV=1	0.987718	-0.0178289	0.898406
G1TLC6	162.4	132.9	162.7	143.8	164.4	143.4	Non-specific serine/threonine protein kinase OS=Oryctolagus cuniculus OX=9986 GN=MARK2 PE=4 SV=1	0.986026	-0.0203024	0.868335
G1T1S3	221	180.9	234.3	196.3	202.2	307	Serine/threonine kinase 17b OS=Oryctolagus cuniculus OX=9986 GN=STK17B PE=3 SV=2	1.10893	0.149166	0.588951
G1T693	886.4	725.4	784.3	700.9	815.8	326.3	KIAA0100 OS=Oryctolagus cuniculus OX=9986 GN=KIAA0100 PE=4 SV=1	0.769167	-0.378631	0.30028
G1T1J9	3130.4	2562.1	2579.5	2890.6	2292.9	2452.8	BMP2 inducible kinase OS=Oryctolagus cuniculus OX=9986 GN=BMP2K PE=4 SV=2	0.92315	-0.115363	0.458133
G1SPT2	6957.6	5695.7	6694.1	5803.4	5838.5	4063	DEAD-box helicase 6 OS=Oryctolagus cuniculus OX=9986 GN=DDX6 PE=3 SV=1	0.811732	-0.300925	0.158231
G1TCP0	4443.4	3637.8	3690.7	4508.6	4591.5	4227.2	Uncharacterized protein OS=Oryctolagus cuniculus OX=9986 PE=4 SV=2	1.13213	0.179037	0.140428
G1T5X6	3555.7	2911.5	3429	3769.6	3514.8	2394.2	3-hydroxy-3-methylglutaryl-CoA lyase OS=Oryctolagus cuniculus OX=9986 GN=HMGCL PE=4 SV=1	0.978012	-0.0320759	0.883883
G1T5N9	2765.5	2265.1	2423.6	2049.9	2127.9	2261.1	WNK lysine deficient protein kinase 1 OS=Oryctolagus cuniculus OX=9986 GN=WNK1 PE=4 SV=1	0.863795	-0.211239	0.101904
Q9TT13	17912.6	14671.6	14322.1	17778.8	18233.4	21381.2	Voltage-dependent anion-selective channel protein 3 OS=Oryctolagus cuniculus OX=9986 GN=VDAC3 PE=2 SV=1	1.22358	0.291104	0.095559
G1TSZ1	349	285.9	323.6	295.6	296.5	302	General transcription factor IIF subunit 1 OS=Oryctolagus cuniculus OX=9986 GN=GTF2F1 PE=4 SV=1	0.932812	-0.100342	0.309052
U3KMH8	3759.1	3079.2	3621.1	2780.9	3076.3	3825.2	Uncharacterized protein OS=Oryctolagus cuniculus OX=9986 GN=LOC100338456 PE=4 SV=1	0.925713	-0.111363	0.526397
G1TN73	793.8	650.2	836.2	790.6	864.8	521.6	Uncharacterized protein OS=Oryctolagus cuniculus OX=9986 GN=C1GALT1 PE=4 SV=1	0.954741	-0.0668187	0.78598
G1TV14	1466.5	1201.5	1366	1656.6	1493.2	2140.2	NFAT activating protein with ITAM motif 1 OS=Oryctolagus cuniculus OX=9986 GN=NFAM1 PE=4 SV=2	1.31135	0.391056	0.115746
G1SZF2	545.9	447.3	500.9	472.2	554	693.1	SH3 domain binding protein 5 OS=Oryctolagus cuniculus OX=9986 GN=SH3BP5 PE=4 SV=1	1.15073	0.202544	0.346965
G1T1S8	436.4	357.5	360.4	460.1	447.4	430.1	Uncharacterized protein OS=Oryctolagus cuniculus OX=9986 GN=LOC100342774 PE=3 SV=2	1.1588	0.212629	0.088439
G1SGF9	8048.5	6594.3	6907.7	7664.9	8764.4	5562.3	Protein tyrosine phosphatase, receptor type J OS=Oryctolagus cuniculus OX=9986 GN=PTPRJ PE=4 SV=2	1.02047	0.0292309	0.894214
G1T8F7	7369	6037.9	6971	7250.1	6542.8	7450.3	NOP56 ribonucleoprotein OS=Oryctolagus cuniculus OX=9986 GN=NOP56 PE=4 SV=2	1.04246	0.0599962	0.581065
G1SML1	1048.9	859.5	989.4	819.1	871.7	931.6	Pericentrin OS=Oryctolagus cuniculus OX=9986 GN=PCNT PE=4 SV=2	0.904962	-0.144071	0.228807
G1SLM0	19797.7	16224.5	16690.9	18172.4	18253.2	13185.8	Polyadenylate-binding protein OS=Oryctolagus cuniculus OX=9986 GN=PABPC1 PE=3 SV=1	0.941159	-0.0874896	0.635153
G1SEN2	3839.9	3147.5	3676.5	3301.6	3474.4	2265.8	GIT ArfGAP 2 OS=Oryctolagus cuniculus OX=9986 GN=GIT2 PE=4 SV=1	0.847889	-0.238053	0.278306
G1TNZ3	108.3	88.7	109.2	96.8	120.6	88.6	Uncharacterized protein OS=Oryctolagus cuniculus OX=9986 PE=3 SV=2	0.999347	-0.000942388	0.995726
G1SN77	728.6	597.4	722	659.9	612.8	555.7	EBNA1 binding protein 2 OS=Oryctolagus cuniculus OX=9986 GN=EBNA1BP2 PE=4 SV=1	0.892773	-0.163635	0.233747
G1TNY1	985.1	807.7	877.9	927.9	996.9	737.3	Translocase of inner mitochondrial membrane 8A OS=Oryctolagus cuniculus OX=9986 GN=TIMM8A PE=3 SV=1	0.99678	-0.00465297	0.976937
G1SLA6	849.7	696.8	816.2	714.5	785	638.6	Integrator complex subunit 7 OS=Oryctolagus cuniculus OX=9986 GN=INTS7 PE=4 SV=1	0.904939	-0.144108	0.298894
G1SZI7	3303.9	2709.4	2872.3	3114	3125.5	2410.4	Carnitine O-octanoyltransferase OS=Oryctolagus cuniculus OX=9986 GN=CROT PE=3 SV=1	0.973474	-0.0387856	0.803538
G1TD28	693.5	568.8	680.5	536.1	617.3	527.9	Small ArfGAP 1 OS=Oryctolagus cuniculus OX=9986 GN=SMAP1 PE=4 SV=1	0.8654	-0.208561	0.148546
G1T239	11131.6	9129.5	9207.6	11481.6	11557.7	14551.4	V-type proton ATPase subunit OS=Oryctolagus cuniculus OX=9986 GN=ATP6V0D1 PE=3 SV=1	1.27561	0.351192	0.087842
G1TZN7	1498.1	1228.7	1033.1	1306.4	1590.7	1070.2	Uncharacterized protein OS=Oryctolagus cuniculus OX=9986 PE=4 SV=1	1.05516	0.0774631	0.749414
G1T586	12506.8	10259.8	10811.1	13313.2	12211.1	18349.7	Uncharacterized protein OS=Oryctolagus cuniculus OX=9986 GN=HNRNPA1 PE=4 SV=1	1.30664	0.385863	0.162399
G1SGY2	795	652.3	736	630.9	723.1	540.4	Tyrosine-protein phosphatase non-receptor type 12 OS=Oryctolagus cuniculus OX=9986 GN=PTPN12 PE=3 SV=1	0.867677	-0.20477	0.224276
G1SSX5	11427.2	9376	10132.3	10122	10482.1	8973.6	Methionyl-tRNA synthetase OS=Oryctolagus cuniculus OX=9986 GN=MARS PE=3 SV=2	0.956109	-0.064753	0.579737
G1SMT2	10938	8974.7	9758.3	7898.7	8976.3	4352.5	Family with sequence similarity 129 member B OS=Oryctolagus cuniculus OX=9986 GN=FAM129B PE=4 SV=1	0.715429	-0.483119	0.135552
G1TUM0	881.9	723.7	650.6	894.1	854.1	3153	Uncharacterized protein OS=Oryctolagus cuniculus OX=9986 GN=LOC100359118 PE=4 SV=1	2.17232	1.11924	0.312078
G1SXU2	3489.8	2863.9	3597.7	2785.5	3353	2111.6	PDZ and LIM domain 5 OS=Oryctolagus cuniculus OX=9986 GN=PDLIM5 PE=4 SV=2	0.829039	-0.270488	0.253466
G1SV24	1401	1149.7	1070.8	1241.6	1711.7	840	Uncharacterized protein OS=Oryctolagus cuniculus OX=9986 GN=LOC100008830 PE=3 SV=1	1.04744	0.0668662	0.842889
G1SW24	15575.2	12782.3	15064.8	11817	16561.1	9745.2	Alanyl-tRNA synthetase OS=Oryctolagus cuniculus OX=9986 GN=AARS PE=3 SV=1	0.877966	-0.187763	0.465621
G1TTN7	1831.6	1503.2	1650.4	1592.7	2013	1115.9	Kinesin-like protein OS=Oryctolagus cuniculus OX=9986 GN=KIF2A PE=3 SV=2	0.947123	-0.0783763	0.766139
G1SR36	1237.6	1015.8	1212.9	1291.9	1396.5	1360.5	Mitochondrial ribosomal protein L39 OS=Oryctolagus cuniculus OX=9986 GN=MRPL39 PE=4 SV=2	1.16807	0.224133	0.064289
G1SG54	7563.5	6208.3	6969.3	6070.9	6517.5	5550.4	Arf-GAP with coiled-coil, ANK repeat and PH domain-containing protein 2 OS=Oryctolagus cuniculus OX=9986 GN=ACAP2 PE=4 SV=2	0.874534	-0.193414	0.146025
G1TA48	19434.1	15953.4	17911.2	14782.1	14672	10091.4	EH domain containing 4 OS=Oryctolagus cuniculus OX=9986 GN=EHD4 PE=3 SV=1	0.74196	-0.430587	0.067851
G1U5F4	210.3	172.6	225.4	266	262.8	142.5	Uncharacterized protein OS=Oryctolagus cuniculus OX=9986 PE=3 SV=1	1.10357	0.142174	0.65501
G1TC07	2694.6	2212.6	2245.2	2144.5	2259.8	1299.9	Charged multivesicular body protein 2A OS=Oryctolagus cuniculus OX=9986 GN=CHMP2A PE=3 SV=1	0.797523	-0.326402	0.228923
G1T9G1	444	364.6	377	366.4	348.3	306.5	MIER1 transcriptional regulator OS=Oryctolagus cuniculus OX=9986 GN=MIER1 PE=4 SV=2	0.861336	-0.215352	0.145562
G1TWC2	5515.1	4528.6	4467	4821.9	5868.1	3942.4	TAO kinase 3 OS=Oryctolagus cuniculus OX=9986 GN=TAOK3 PE=4 SV=1	1.00839	0.0120494	0.953373
G1SMM7	2704.4	2220.9	2383.9	2690.2	1943.3	5075.7	Small nuclear ribonucleoprotein Sm D3 OS=Oryctolagus cuniculus OX=9986 GN=SNRPD3 PE=3 SV=1	1.32835	0.409639	0.449426
G1T7Q3	5936.9	4876.8	5666.7	6151.3	5900.2	5040.1	RAB35, member RAS oncogene family OS=Oryctolagus cuniculus OX=9986 GN=RAB35 PE=4 SV=1	1.03709	0.0525355	0.682637
G1TDL2	5878.8	4829.3	5086.8	5275.8	4229.9	6649.3	Uncharacterized protein OS=Oryctolagus cuniculus OX=9986 GN=LOC100343129 PE=1 SV=1	1.0228	0.0325212	0.883438
G1TV45	241	198	199.4	218.2	225.4	189.3	COMM domain containing 6 OS=Oryctolagus cuniculus OX=9986 GN=COMMD6 PE=4 SV=1	0.991385	-0.0124827	0.923381
G1SDU1	350.6	288.1	296.7	295.4	293.4	217.1	Synapse associated protein 1 OS=Oryctolagus cuniculus OX=9986 GN=SYAP1 PE=4 SV=2	0.861557	-0.214982	0.253029
G1SZX9	1359.7	1117.4	1161.7	1290.5	1379.5	954.3	E3 ubiquitin-protein ligase OS=Oryctolagus cuniculus OX=9986 GN=WWP2 PE=4 SV=1	0.996015	-0.00576063	0.975737
G1TBC8	976	802.2	830.5	707.2	880.9	1053	CTP synthase OS=Oryctolagus cuniculus OX=9986 GN=CTPS1 PE=3 SV=1	1.01242	0.0178079	0.928717
G1U3M5	5693.7	4679.7	5096.2	4713.6	5489.1	4646.8	Protein arginine methyltransferase 1 OS=Oryctolagus cuniculus OX=9986 GN=PRMT1 PE=3 SV=1	0.959915	-0.0590214	0.632244
G1TF20	2019.5	1660.4	1861.4	1615.3	1877	1099.1	Pleckstrin homology domain containing O2 OS=Oryctolagus cuniculus OX=9986 GN=PLEKHO2 PE=4 SV=2	0.828578	-0.271291	0.27576
G1SW58	8841.1	7269.3	7441.5	7200.8	8298.3	4377	Tyrosine-protein kinase OS=Oryctolagus cuniculus OX=9986 GN=FGR PE=3 SV=1	0.843928	-0.244808	0.389156
G1SLH2	1973.1	1622.3	1720.3	2015.2	2090.5	1609.8	Immunoglobulin superfamily member 6 OS=Oryctolagus cuniculus OX=9986 GN=IGSF6 PE=4 SV=2	1.07521	0.10462	0.5051
P30947	63510.2	52235.3	54181.3	44024.4	51054.6	59623.4	Heat shock protein HSP 90-beta OS=Oryctolagus cuniculus OX=9986 GN=HSP90AB1 PE=1 SV=2	0.910406	-0.135418	0.423351
G1SFE6	3394.1	2792.3	2715.1	3393.8	2940.9	3902	Small nuclear ribonucleoprotein polypeptide B2 OS=Oryctolagus cuniculus OX=9986 GN=SNRPB2 PE=4 SV=2	1.15	0.20163	0.273456
G1SDK7	1763.3	1450.8	1285	1692.5	1447	845.5	Uncharacterized protein OS=Oryctolagus cuniculus OX=9986 GN=HAVCR1 PE=4 SV=2	0.885733	-0.175056	0.583905
G1TMV6	1218.5	1002.6	999	961.3	1182	810.5	tRNA (adenine(58)-N(1))-methyltransferase non-catalytic subunit TRM6 OS=Oryctolagus cuniculus OX=9986 GN=TRMT6 PE=3 SV=1	0.917301	-0.124533	0.532259
G1SDV3	969.6	797.9	914.8	721	708.6	671.7	3-hydroxybutyrate dehydrogenase 2 OS=Oryctolagus cuniculus OX=9986 GN=BDH2 PE=4 SV=1	0.783395	-0.352188	0.021371
G1TEI2	656.3	540.1	526.7	592.6	629	302.6	Ferredoxin 1 OS=Oryctolagus cuniculus OX=9986 GN=FDX1 PE=4 SV=2	0.884569	-0.176953	0.583016
G1TSK0	1041.6	857.4	1029.2	906.8	918.1	553.3	Ribonucleoprotein, PTB binding 2 OS=Oryctolagus cuniculus OX=9986 GN=RAVER2 PE=4 SV=1	0.812171	-0.300145	0.242202
G1U3W0	980.3	807.1	962.5	1159	1024.5	439.7	Dol-P-Man:Man(5)GlcNAc(2)-PP-Dol alpha-1,3-mannosyltransferase OS=Oryctolagus cuniculus OX=9986 GN=ALG3 PE=4 SV=1	0.953926	-0.0680507	0.861784
G1TM58	673.4	554.4	715.1	723.9	516	363.5	Uncharacterized protein OS=Oryctolagus cuniculus OX=9986 GN=IL3RA PE=4 SV=2	0.825261	-0.277078	0.380837
G1TCU1	522.4	430.2	543.3	554.4	510.6	506	Zinc finger CCCH-type containing 7A OS=Oryctolagus cuniculus OX=9986 GN=ZC3H7A PE=4 SV=1	1.0502	0.0706696	0.546176
G1SH52	2000.5	1647.8	2183	1465.8	1110.3	1444.4	RCSD domain containing 1 OS=Oryctolagus cuniculus OX=9986 GN=RCSD1 PE=4 SV=2	0.689469	-0.536442	0.036236
G1SQF9	4430.9	3649.8	4249	4795.1	4511.9	4365.6	Paraspeckle component 1 OS=Oryctolagus cuniculus OX=9986 GN=PSPC1 PE=4 SV=1	1.10892	0.14915	0.169604
G1TED6	23847.5	19646.4	36641.9	20884.3	41727.7	38101	Annexin OS=Oryctolagus cuniculus OX=9986 GN=ANXA5 PE=3 SV=2	1.25678	0.329731	0.450622
G1THB2	3296.3	2715.6	2705	2454.7	2339.8	1486.8	NAD kinase OS=Oryctolagus cuniculus OX=9986 GN=NADK PE=3 SV=1	0.720589	-0.472751	0.088625
G1TA82	8648.1	7124.8	7811.4	7913.8	7804.8	5135.1	WASH complex subunit 5 OS=Oryctolagus cuniculus OX=9986 GN=WASHC5 PE=4 SV=1	0.88422	-0.177523	0.418333
G1SSH0	810.5	667.8	733.8	762.9	729.8	675.2	Catenin beta like 1 OS=Oryctolagus cuniculus OX=9986 GN=CTNNBL1 PE=4 SV=2	0.980019	-0.0291184	0.776517
G1TDD2	231.6	190.8	184.3	191.8	191.4	194.6	UBX domain protein 1 OS=Oryctolagus cuniculus OX=9986 GN=UBXN1 PE=4 SV=1	0.952365	-0.0704135	0.551555
G1U541	4567.6	3764.7	4095.2	4334	4025	2347.5	Coatomer subunit gamma OS=Oryctolagus cuniculus OX=9986 GN=LOC100344983 PE=3 SV=2	0.861517	-0.215049	0.433569
G1TW86	1834.6	1512.3	1736.5	1454.7	1779.6	1373.6	Uncharacterized protein OS=Oryctolagus cuniculus OX=9986 GN=ZPR1 PE=4 SV=1	0.90646	-0.141685	0.368391
G1SEI4	8595.6	7085.3	6666.2	7843.2	8459.4	5601.3	N-myc and STAT interactor OS=Oryctolagus cuniculus OX=9986 GN=NMI PE=4 SV=2	0.980167	-0.0289005	0.894669
G1THY5	1380.2	1138.2	1312.6	1337.6	1346.4	941.1	Peptidyl-prolyl cis-trans isomerase OS=Oryctolagus cuniculus OX=9986 GN=PPIL1 PE=3 SV=1	0.946254	-0.0797006	0.674728
G1T1U7	7593.2	6264	7551.1	6003.3	6706.5	4511.8	Methylenetetrahydrofolate dehydrogenase, cyclohydrolase and formyltetrahydrofolate synthetase 1 OS=Oryctolagus cuniculus OX=9986 GN=MTHFD1 PE=3 SV=1	0.804436	-0.31395	0.148228
G1T6W4	3432.2	2831.4	6010.4	3897	7173.5	3407.7	Annexin OS=Oryctolagus cuniculus OX=9986 GN=ANXA8 PE=3 SV=1	1.17958	0.238277	0.65665
B7NZF5	1082	892.9	898.8	986.4	918.2	1053.8	Microfibrillar-associated protein 1 (Predicted) OS=Oryctolagus cuniculus OX=9986 GN=MFAP1 PE=4 SV=1	1.02947	0.0419074	0.72002
G1TTD4	1052.6	868.7	1014.4	913.8	1028.1	483.2	SID1 transmembrane family member 2 OS=Oryctolagus cuniculus OX=9986 GN=SIDT2 PE=4 SV=2	0.826072	-0.275661	0.386093
G1TGK8	1140.4	941.2	906	1178.9	1089.9	1778.2	Uncharacterized protein OS=Oryctolagus cuniculus OX=9986 PE=4 SV=1	1.3546	0.437866	0.196535
G1T2N4	1706.2	1408.5	1599.2	1679.9	1550.6	1655.2	U2 snRNP associated SURP domain containing OS=Oryctolagus cuniculus OX=9986 GN=U2SURP PE=4 SV=1	1.03645	0.0516436	0.581654
P63169	979.6	808.7	1035.1	905.5	960	1138.8	Dynein light chain 1, cytoplasmic OS=Oryctolagus cuniculus OX=9986 GN=DYNLL1 PE=1 SV=1	1.06407	0.0895958	0.571679
G1T301	5490.9	4533.1	5127.7	5855.4	6907.2	4026.6	Zinc finger protein 326 OS=Oryctolagus cuniculus OX=9986 GN=ZNF326 PE=3 SV=1	1.10807	0.148054	0.571463
G1TGM9	1291.5	1066.5	1138.2	1024.5	1115.5	980.1	Deoxyribonuclease 2, lysosomal OS=Oryctolagus cuniculus OX=9986 GN=DNASE2 PE=4 SV=1	0.892426	-0.164196	0.180635
G1SQM1	1880.5	1553.3	1701.8	1819.3	1987.6	2268	WDFY family member 4 OS=Oryctolagus cuniculus OX=9986 GN=WDFY4 PE=4 SV=2	1.1829	0.242328	0.124518
G1TX78	669.2	552.7	683.2	741.3	704.1	815.3	Translocase of outer mitochondrial membrane 20 OS=Oryctolagus cuniculus OX=9986 GN=TOMM20 PE=3 SV=1	1.18666	0.246903	0.087793
G1SU30	1843.4	1522.8	1672.9	1672.1	1688.3	1732.6	BCL2 associated athanogene 6 OS=Oryctolagus cuniculus OX=9986 GN=BAG6 PE=4 SV=1	1.0107	0.0153491	0.858265
G1U157	1685.7	1392.6	1744.4	1452.6	1509.1	789.4	Uncharacterized protein OS=Oryctolagus cuniculus OX=9986 GN=LOC100348318 PE=4 SV=1	0.777801	-0.362527	0.234489
G1SNW9	983.1	812.2	963.1	1130.9	1038.3	833.4	cAMP responsive element binding protein 1 OS=Oryctolagus cuniculus OX=9986 GN=CREB1 PE=4 SV=1	1.08853	0.122381	0.474091
G1SDJ0	14602.8	12066.4	14874.9	15003.5	13117.1	11608.6	Uncharacterized protein OS=Oryctolagus cuniculus OX=9986 PE=4 SV=1	0.956314	-0.0644437	0.672396
G1T9Y4	936.8	774.1	781.5	679.4	827.3	904.1	Charged multivesicular body protein 7 OS=Oryctolagus cuniculus OX=9986 GN=CHMP7 PE=3 SV=1	0.96726	-0.0480244	0.76399
G1TBV6	233.7	193.1	228.8	248	291.4	268.3	Cation-transporting ATPase OS=Oryctolagus cuniculus OX=9986 GN=ATP13A3 PE=3 SV=1	1.232	0.301003	0.047333
G1T0B0	592.6	489.8	510.8	415.1	539.4	320.2	Chromosome 11 open reading frame 68 OS=Oryctolagus cuniculus OX=9986 GN=C11orf68 PE=4 SV=1	0.800088	-0.321769	0.20807
G1TB99	808.4	668.3	671.8	589.1	744.3	413.8	Uncharacterized protein OS=Oryctolagus cuniculus OX=9986 PE=4 SV=1	0.813219	-0.298284	0.275636
G1TS94	334.7	276.7	294.1	371.9	345.2	648.1	Uncharacterized protein OS=Oryctolagus cuniculus OX=9986 GN=MRPL48 PE=4 SV=1	1.50768	0.592325	0.194176
G1SKF7	15855	13110.9	14972.6	14709.3	12105.9	21622.4	60S ribosomal protein L6 OS=Oryctolagus cuniculus OX=9986 GN=RPL6 PE=1 SV=1	1.1024	0.140641	0.638219
G1SWU1	11287.4	9335.2	10353.3	11163.1	12362.9	9402.4	Succinyl-CoA:3-ketoacid-coenzyme A transferase OS=Oryctolagus cuniculus OX=9986 GN=OXCT1 PE=3 SV=2	1.06303	0.0881864	0.561075
G1U074	1508.7	1248.1	1381.2	1475.9	1336.2	1026.8	Uncharacterized protein OS=Oryctolagus cuniculus OX=9986 PE=4 SV=1	0.927719	-0.10824	0.549032
G1SJJ9	946.7	783.1	861.8	718.3	920.1	484.2	Methionine sulfoxide reductase A OS=Oryctolagus cuniculus OX=9986 GN=MSRA PE=3 SV=1	0.819031	-0.28801	0.309774
G1TFW8	24425.4	20207	15599.7	19566	18706.5	35454.3	Lactotransferrin OS=Oryctolagus cuniculus OX=9986 GN=LTF PE=3 SV=2	1.22405	0.291657	0.495922
G1U7U3	665.5	550.6	551.8	496.4	636.1	547.8	Nucleoside diphosphate kinase OS=Oryctolagus cuniculus OX=9986 GN=NME1 PE=3 SV=1	0.95045	-0.0733174	0.628538
U3KMI6	307.3	254.2	271.8	319.2	249.7	202.2	Uncharacterized protein OS=Oryctolagus cuniculus OX=9986 PE=4 SV=1	0.925357	-0.111918	0.608774
G1TCJ8	709.9	587.5	610.1	646	637.8	544.3	Acyl-CoA-binding domain-containing protein 5 OS=Oryctolagus cuniculus OX=9986 GN=ACBD5 PE=4 SV=1	0.958375	-0.0613378	0.623109
U3KMR8	496.4	410.9	561	532.7	440	360.8	Uncharacterized protein OS=Oryctolagus cuniculus OX=9986 PE=4 SV=1	0.908193	-0.138929	0.533415
G1U945	9335.1	7726.8	8026.1	8602.7	6848.8	7031.7	Uncharacterized protein OS=Oryctolagus cuniculus OX=9986 GN=LOC100354714 PE=1 SV=1	0.896173	-0.158151	0.308105
G1TU32	302.6	250.5	248.3	281	279.2	152.7	Late endosomal/lysosomal adaptor, MAPK and MTOR activator 2 OS=Oryctolagus cuniculus OX=9986 GN=LAMTOR2 PE=4 SV=1	0.889568	-0.168823	0.556453
G1SIB1	575.5	476.4	584.9	530.8	521.1	654.2	General transcription factor IIE subunit 1 OS=Oryctolagus cuniculus OX=9986 GN=GTF2E1 PE=4 SV=1	1.04234	0.0598246	0.69676
G1SNW7	415.1	343.7	397.5	428	400.4	305.8	SNARE-associated protein Snapin OS=Oryctolagus cuniculus OX=9986 GN=SNAPIN PE=3 SV=1	0.980887	-0.0278412	0.871649
G1U6A6	361.5	299.3	317.1	307.8	317.4	315.2	Uncharacterized protein OS=Oryctolagus cuniculus OX=9986 GN=NRBP1 PE=4 SV=1	0.961653	-0.0564117	0.540882
G1U9T4	11208.3	9285.5	10805.2	8126.8	10363.1	12315.7	Nucleoside diphosphate kinase OS=Oryctolagus cuniculus OX=9986 GN=NME2 PE=3 SV=1	0.984236	-0.0229238	0.908529
G1TTT6	900.4	746	701.9	852.9	718.8	780.5	Tetraspanin OS=Oryctolagus cuniculus OX=9986 GN=TSPAN18 PE=3 SV=2	1.00166	0.00239433	0.986379
G1SJ96	15609.2	12932.9	14111.7	13851.4	15022.5	11281.9	Dedicator of cytokinesis 8 OS=Oryctolagus cuniculus OX=9986 GN=DOCK8 PE=3 SV=1	0.941435	-0.0870666	0.570498
G1SYE0	479.7	397.4	456.2	420.8	512.7	325.3	Abhydrolase domain containing 14B OS=Oryctolagus cuniculus OX=9986 GN=ABHD14B PE=4 SV=1	0.944124	-0.0829517	0.69727
G1TDU0	21689.3	17974.3	19812.4	17807.3	20778.6	14332.5	Kinesin-like protein OS=Oryctolagus cuniculus OX=9986 GN=KIF5B PE=3 SV=2	0.889744	-0.168538	0.366676
G1TCY8	3094.9	2565.2	2837.6	2764	2842.4	2013.4	Transducin beta like 1 X-linked receptor 1 OS=Oryctolagus cuniculus OX=9986 GN=TBL1XR1 PE=4 SV=1	0.89669	-0.157319	0.392089
G1STZ8	1250.2	1036.3	1079.5	983.6	1144.3	1160.6	Inhibitor of nuclear factor kappa B kinase subunit gamma OS=Oryctolagus cuniculus OX=9986 GN=IKBKG PE=4 SV=1	0.976976	-0.033605	0.779681
G1SV13	22481	18634.5	19807.5	16284.6	19777.7	13957.5	Ubiquitin-like modifier-activating enzyme 1 OS=Oryctolagus cuniculus OX=9986 GN=UBA1 PE=3 SV=1	0.821033	-0.284488	0.149208
G1SXK6	2545.2	2109.9	3078.8	2197.2	2946.8	1299.5	PDZ and LIM domain 7 OS=Oryctolagus cuniculus OX=9986 GN=PDLIM7 PE=4 SV=1	0.83315	-0.263352	0.479735
G1SN21	19568.5	16221.5	16098.6	13013.7	17226.3	9819.4	Purine nucleoside phosphorylase OS=Oryctolagus cuniculus OX=9986 GN=PNP PE=3 SV=1	0.772027	-0.373277	0.179629
G1SU33	2159.2	1789.9	2067.6	2039.5	2121.5	2035.8	NOP2/Sun RNA methyltransferase family member 2 OS=Oryctolagus cuniculus OX=9986 GN=NSUN2 PE=3 SV=1	1.02993	0.0425505	0.627767
G1SWK8	3165.9	2624.7	3155.4	2443	2889.2	2104.8	Proteasome subunit beta OS=Oryctolagus cuniculus OX=9986 GN=PSMB7 PE=3 SV=2	0.831321	-0.266522	0.156752
G1TAH7	43044.4	35691.2	39025.4	30763.3	34586.3	36555.5	Transketolase OS=Oryctolagus cuniculus OX=9986 GN=TKT PE=4 SV=2	0.865355	-0.208636	0.12415
G1T860	2165.1	1795.7	1842.6	2084.6	1895.5	2213.7	Myosin IXB OS=Oryctolagus cuniculus OX=9986 GN=MYO9B PE=3 SV=1	1.06727	0.0939265	0.430009
G1T2G5	978.4	811.6	977.2	957.1	983	1307.1	EGF domain specific O-linked N-acetylglucosamine transferase OS=Oryctolagus cuniculus OX=9986 GN=EOGT PE=4 SV=2	1.17346	0.23077	0.271331
G1SW32	2019.7	1675.7	1872.6	1582.9	1541.1	1060.8	Uncharacterized protein OS=Oryctolagus cuniculus OX=9986 GN=LOC100340393 PE=4 SV=2	0.75158	-0.412001	0.077188
G1TDH6	390.3	323.8	335.9	395.3	361.1	1999.3	EGF like repeats and discoidin domains 3 OS=Oryctolagus cuniculus OX=9986 GN=EDIL3 PE=4 SV=1	2.62448	1.39203	0.352454
G1TMD8	4555.3	3779.7	3985.8	3434.6	4202.6	2302.6	Serine/threonine-protein phosphatase OS=Oryctolagus cuniculus OX=9986 GN=PPP5C PE=3 SV=1	0.80675	-0.309806	0.255524
G1TS77	449.9	373.3	402	453.3	417.6	319.7	Sorting nexin 16 OS=Oryctolagus cuniculus OX=9986 GN=SNX16 PE=4 SV=2	0.97176	-0.041328	0.813436
G1U992	1988.2	1649.7	2011.2	1755	1885.1	1692	ArfGAP with RhoGAP domain, ankyrin repeat and PH domain 1 OS=Oryctolagus cuniculus OX=9986 GN=ARAP1 PE=4 SV=1	0.943885	-0.083317	0.461776
G1TCT3	1051.7	872.8	958	852.8	923.7	575.1	Carbamoyl-phosphate synthetase 2, aspartate transcarbamylase, and dihydroorotase OS=Oryctolagus cuniculus OX=9986 GN=CAD PE=3 SV=2	0.81582	-0.293677	0.208861
G1SUL3	910.6	755.7	880	869.2	896.7	806.8	TATA element modulatory factor 1 OS=Oryctolagus cuniculus OX=9986 GN=TMF1 PE=4 SV=1	1.01037	0.0148809	0.879159
G1T9X1	803.3	666.7	797.4	848.9	748.1	750.4	Uncharacterized protein OS=Oryctolagus cuniculus OX=9986 GN=LOC100338745 PE=4 SV=2	1.03528	0.0500252	0.656547
G1SK52	6787.8	5634.2	6262.6	5250.3	6242.7	5136	X-prolyl aminopeptidase 1 OS=Oryctolagus cuniculus OX=9986 GN=XPNPEP1 PE=3 SV=2	0.889984	-0.168149	0.230142
G1SCH8	192	159.4	236	211.7	223.1	189.8	Tudor domain containing 7 OS=Oryctolagus cuniculus OX=9986 GN=TDRD7 PE=4 SV=1	1.06333	0.0885894	0.63604
G1TRS0	6876.5	5710.2	6597	6760.8	6559.2	5588	Dyskerin pseudouridine synthase 1 OS=Oryctolagus cuniculus OX=9986 GN=DKC1 PE=4 SV=2	0.985628	-0.0208849	0.864356
G1TCY4	15979	13269.4	15110.7	12788.3	14740.2	10367.2	Sorting nexin OS=Oryctolagus cuniculus OX=9986 GN=SNX5 PE=3 SV=1	0.854294	-0.227195	0.223232
G1T5W7	166.7	138.5	150.6	115.8	232	134.7	UDP-galactose-4-epimerase OS=Oryctolagus cuniculus OX=9986 GN=GALE PE=3 SV=1	1.05858	0.0821276	0.821332
G1SI95	16944.5	14074.3	14510	18147.7	18348.6	13134.9	Huntingtin interacting protein 1 OS=Oryctolagus cuniculus OX=9986 GN=HIP1 PE=4 SV=2	1.09011	0.124468	0.51671
G1TUC8	28127.4	23363.2	24643	31067.8	31428.2	31415.5	Actinin alpha 4 OS=Oryctolagus cuniculus OX=9986 GN=ACTN4 PE=4 SV=2	1.23351	0.302768	0.014277
G1SNM1	7839.5	6511.8	7149.8	6086	7661.8	4813.8	Glycyl-tRNA synthetase OS=Oryctolagus cuniculus OX=9986 GN=GARS PE=4 SV=2	0.863286	-0.21209	0.341522
G1SYG1	1099.7	913.5	947.2	833.8	909.8	587.1	Arylformamidase OS=Oryctolagus cuniculus OX=9986 GN=AFMID PE=4 SV=1	0.787292	-0.345029	0.136788
G1SJ05	2364	1963.7	2033.1	2501.5	2531	1629.2	Adenylate cyclase OS=Oryctolagus cuniculus OX=9986 GN=ADCY7 PE=3 SV=2	1.0473	0.0666817	0.769994
G1T6I9	550	457	545.2	546.6	576.6	506.3	Galectin OS=Oryctolagus cuniculus OX=9986 GN=LGALS8 PE=4 SV=2	1.0498	0.0701145	0.518653
G1SW00	6631.3	5509.2	6571.7	6459.5	6908.4	6590.8	Glutamate-ammonia ligase OS=Oryctolagus cuniculus OX=9986 GN=GLUL PE=3 SV=2	1.06661	0.0930382	0.34465
G1STH2	427.2	355	392.5	394.2	398.1	457.5	RANBP2-type and C3HC4-type zinc finger containing 1 OS=Oryctolagus cuniculus OX=9986 GN=RBCK1 PE=4 SV=1	1.06393	0.0894046	0.439962
G1SVD5	13715.4	11399.6	11857.4	12765.8	11834	10428.1	Adenosine deaminase, RNA specific OS=Oryctolagus cuniculus OX=9986 GN=ADAR PE=4 SV=1	0.947407	-0.0779438	0.545035
G1SKK9	9021.5	7499.6	8501.3	8214.3	7640.4	6686.7	SON DNA binding protein OS=Oryctolagus cuniculus OX=9986 GN=SON PE=4 SV=1	0.900849	-0.150643	0.260053
G1SNT8	38531.3	32033.3	51924.1	48360.4	36763.7	77774.7	Annexin OS=Oryctolagus cuniculus OX=9986 GN=ANXA6 PE=3 SV=2	1.32991	0.411328	0.376051
G1T2N8	287	238.6	246.1	198.8	238.9	414.6	Exportin for tRNA OS=Oryctolagus cuniculus OX=9986 GN=XPOT PE=4 SV=2	1.10444	0.143322	0.712753
G1SF10	31694.1	26350.8	23415.7	19960.7	25203.3	11988.5	Uncharacterized protein OS=Oryctolagus cuniculus OX=9986 GN=XDH PE=4 SV=2	0.701597	-0.511286	0.149011
G1SEF5	825.9	686.7	807.6	874	823.9	835.1	Pre-mRNA processing factor 38A OS=Oryctolagus cuniculus OX=9986 GN=PRPF38A PE=4 SV=1	1.09172	0.126598	0.199762
G1SR07	6533.6	5432.2	6159.6	6570.1	6084.2	5767.1	Carbonyl reductase 4 OS=Oryctolagus cuniculus OX=9986 GN=CBR4 PE=4 SV=1	1.01633	0.0233703	0.816797
G1SQ01	10440.9	8681	8999.8	7171	7940.5	6036.9	Uncharacterized protein OS=Oryctolagus cuniculus OX=9986 GN=LOC100346892 PE=4 SV=1	0.752031	-0.411136	0.039787
G1TEA8	10317.7	8579.5	9828.4	9290.4	9685.6	7129.3	Inosine-5'-monophosphate dehydrogenase OS=Oryctolagus cuniculus OX=9986 GN=IMPDH2 PE=3 SV=1	0.908782	-0.137994	0.409078
G1ST33	4821.7	4009.7	4417.5	4258.8	4329.7	9070.1	RAB27A, member RAS oncogene family OS=Oryctolagus cuniculus OX=9986 GN=RAB27A PE=4 SV=1	1.33283	0.414498	0.412703
G1SK67	7877.7	6551.5	7521.5	7819.7	7735.4	4868.2	Histone deacetylase OS=Oryctolagus cuniculus OX=9986 GN=HDAC1 PE=3 SV=1	0.930417	-0.104051	0.652482
G1TAI0	2502.3	2081.1	2141.9	2161.5	2352.5	1464	Importin subunit alpha OS=Oryctolagus cuniculus OX=9986 GN=KPNA2 PE=3 SV=1	0.888882	-0.169936	0.453475
G1SFR8	4139.6	3443.1	3685.3	3991.5	3865.7	5391.3	40S ribosomal protein S12 OS=Oryctolagus cuniculus OX=9986 GN=RPS12 PE=1 SV=1	1.17576	0.233597	0.280756
U3KNB2	200.7	167	179.4	174.7	186.1	333.2	DEAD-box helicase 20 OS=Oryctolagus cuniculus OX=9986 GN=DDX20 PE=4 SV=1	1.26851	0.343131	0.399512
G1TAK0	1094.5	910.5	1085.8	917.1	875.9	816.1	Proline rich coiled-coil 2C OS=Oryctolagus cuniculus OX=9986 GN=PRRC2C PE=4 SV=1	0.84415	-0.244429	0.073838
G1TA15	14748.1	12271.7	12670.4	12320.8	13550.3	8880.9	Leucyl-tRNA synthetase OS=Oryctolagus cuniculus OX=9986 GN=LARS PE=3 SV=2	0.875581	-0.191687	0.360205
G1TTL7	862.2	717.6	740.9	1029	1016.5	694.3	Translocase of outer mitochondrial membrane 40 OS=Oryctolagus cuniculus OX=9986 GN=TOMM40 PE=4 SV=1	1.18059	0.23951	0.303273
G1TI13	1762.5	1466.9	1647.4	1438.5	1478.5	942	DNA replication licensing factor MCM7 OS=Oryctolagus cuniculus OX=9986 GN=MCM7 PE=3 SV=1	0.791298	-0.337707	0.153288
G1SM37	1901.3	1582.6	1991	1933.3	1766	1943.2	Double PHD fingers 2 OS=Oryctolagus cuniculus OX=9986 GN=DPF2 PE=4 SV=1	1.03061	0.0435013	0.703513
G1SW48	6130.9	5103	5628.1	4517	5536.1	4843.4	Shootin 1 OS=Oryctolagus cuniculus OX=9986 GN=SHTN1 PE=4 SV=1	0.883436	-0.178802	0.195744
G1SFF1	174.8	145.6	177	174.9	155.3	125.6	Phosphodiesterase OS=Oryctolagus cuniculus OX=9986 GN=PDE4A PE=3 SV=1	0.916365	-0.126006	0.473516
G1U6F4	3428.7	2856	2989.7	3202.5	2900.7	1446.6	Purine rich element binding protein B OS=Oryctolagus cuniculus OX=9986 GN=PURB PE=4 SV=1	0.814047	-0.296816	0.369481
G1U3C1	348	289.9	351.1	329.1	326.8	927.4	MORC family CW-type zinc finger 3 OS=Oryctolagus cuniculus OX=9986 GN=MORC3 PE=4 SV=2	1.60091	0.678892	0.379727
G1TFG8	777.5	647.8	821.8	933.9	1065.2	726.8	Uncharacterized protein OS=Oryctolagus cuniculus OX=9986 PE=4 SV=1	1.21307	0.278669	0.225508
G1SD81	10016.4	8345.3	9609.2	7167.1	8655.4	4113.2	Hexokinase 3 OS=Oryctolagus cuniculus OX=9986 GN=HK3 PE=3 SV=1	0.71273	-0.488572	0.134049
G1SMG5	7893.7	6576.9	6973.6	5668.7	6818.7	5210.2	G1 to S phase transition 1 OS=Oryctolagus cuniculus OX=9986 GN=GSPT1 PE=4 SV=1	0.825286	-0.277034	0.113074
G1SXL6	743.2	619.3	700.4	687.7	866.4	417.7	FRY like transcription coactivator OS=Oryctolagus cuniculus OX=9986 GN=FRYL PE=4 SV=2	0.955839	-0.0651605	0.833517
G1TSX1	125.6	104.6	154.4	154.8	97	96.1	Negative regulator of reactive oxygen species OS=Oryctolagus cuniculus OX=9986 GN=NRROS PE=4 SV=1	0.904576	-0.144686	0.639728
G1SSV1	441.6	368	432.4	343.7	368.8	197.3	COP9 signalosome subunit 8 OS=Oryctolagus cuniculus OX=9986 GN=COPS8 PE=4 SV=1	0.732528	-0.449044	0.130203
P62497	8698.7	7249.5	7653.5	7260.4	8619.7	4107.6	Eukaryotic peptide chain release factor subunit 1 OS=Oryctolagus cuniculus OX=9986 GN=ETF1 PE=1 SV=3	0.846875	-0.239779	0.439374
G1SX69	3455.2	2880.8	3389.2	3039.7	3145.1	2394.9	Tyrosine-protein kinase OS=Oryctolagus cuniculus OX=9986 GN=MAN2A2 PE=3 SV=1	0.882213	-0.180801	0.267271
G1SWA0	475.4	396.5	437.2	389.5	401.2	279.9	RHO family interacting cell polarization regulator 1 OS=Oryctolagus cuniculus OX=9986 GN=RIPOR1 PE=4 SV=1	0.817814	-0.290155	0.150969
G1U448	4010.3	3344.6	3825	3987.7	3875	2570.1	Uncharacterized protein OS=Oryctolagus cuniculus OX=9986 GN=FUBP1 PE=4 SV=1	0.933175	-0.0997804	0.642172
G1SMC0	1050.8	876.4	1228	705.2	713.2	395.4	Pentaxin OS=Oryctolagus cuniculus OX=9986 GN=CRP PE=3 SV=1	0.574861	-0.798715	0.037387
P67873	3677.2	3067	3317.5	3554.8	3416.3	2339.2	Casein kinase II subunit beta OS=Oryctolagus cuniculus OX=9986 GN=CSNK2B PE=2 SV=1	0.925321	-0.111974	0.585662
G1SSZ9	339.1	282.9	319.2	287.7	294.1	245.4	Serine/threonine-protein kinase OS=Oryctolagus cuniculus OX=9986 GN=PRKD3 PE=3 SV=1	0.878878	-0.186265	0.165814
G1TIJ7	629.9	525.5	585.6	679.6	641.8	398.7	DnaJ heat shock protein family (Hsp40) member C1 OS=Oryctolagus cuniculus OX=9986 GN=DNAJC1 PE=4 SV=2	0.987995	-0.0174244	0.943923
G1TN40	1252.8	1045.3	1247.4	1459.8	1275.4	1601	TATA-box binding protein associated factor 6 OS=Oryctolagus cuniculus OX=9986 GN=TAF6 PE=4 SV=1	1.22301	0.290442	0.08627
G1TLY6	7124.7	5945.1	7443.7	7866.1	6381.6	11734.8	Uncharacterized protein OS=Oryctolagus cuniculus OX=9986 PE=3 SV=2	1.2666	0.340967	0.333636
G1SP30	7813	6519.8	6839.3	5431.1	5265.7	4096.6	Peptidylprolyl isomerase OS=Oryctolagus cuniculus OX=9986 GN=FKBP5 PE=4 SV=1	0.698721	-0.517212	0.020572
G1SFU0	17594.5	14682.5	15772.4	18301.1	17331.2	20342.7	Ras-related protein Rab-7a OS=Oryctolagus cuniculus OX=9986 GN=RAB7A PE=4 SV=1	1.16495	0.220264	0.097928
G1TMD2	9564.6	7981.6	9014.5	8912.2	9218.4	5285.6	FCH domain only 2 OS=Oryctolagus cuniculus OX=9986 GN=FCHO2 PE=4 SV=2	0.881611	-0.181786	0.479495
U3KMI4	3737	3118.7	3384.2	3368.9	3612.4	4101.5	RAP1A, member of RAS oncogene family OS=Oryctolagus cuniculus OX=9986 GN=RAP1A PE=4 SV=1	1.08231	0.11412	0.372614
U3KN22	4710.3	3931.5	5107.3	5710.9	5614.4	3940.6	Glutathione S-transferase kappa OS=Oryctolagus cuniculus OX=9986 GN=GSTK1 PE=3 SV=1	1.11032	0.150976	0.492751
G1TBJ1	848.8	708.6	1087.8	593.1	517.8	285	Zinc finger protein 879 OS=Oryctolagus cuniculus OX=9986 GN=ZNF879 PE=4 SV=2	0.527711	-0.92218	0.044844
G1TN13	6159.8	5142.6	5597.6	5324.8	4810.3	3569.8	Intersectin 1 OS=Oryctolagus cuniculus OX=9986 GN=ITSN1 PE=4 SV=1	0.810941	-0.302331	0.14962
G1SIZ2	3502.4	2924.1	3441.3	3473.4	3053.8	5333.9	Uncharacterized protein OS=Oryctolagus cuniculus OX=9986 GN=LOC100354063 PE=1 SV=1	1.202	0.265437	0.410846
G1SWX7	2755	2300.4	2525.2	3345.5	2700.5	3818.1	ATP binding cassette subfamily A member 1 OS=Oryctolagus cuniculus OX=9986 GN=ABCA1 PE=4 SV=1	1.30123	0.379875	0.094955
G1TSF2	171.8	143.4	159.9	175.5	280	123.1	DnaJ heat shock protein family (Hsp40) member C14 OS=Oryctolagus cuniculus OX=9986 GN=DNAJC14 PE=4 SV=2	1.21785	0.284335	0.502322
G1SEQ2	1913.8	1598	1767.8	1469.1	1839	1287.9	Polysaccharide biosynthesis domain containing 1 OS=Oryctolagus cuniculus OX=9986 GN=PBDC1 PE=4 SV=2	0.87052	-0.200051	0.287921
G1STV0	23793.4	19869.1	19856.8	17521.8	17551.2	11029	Calpastatin OS=Oryctolagus cuniculus OX=9986 GN=CAST PE=4 SV=2	0.725795	-0.462366	0.083763
G1T7R2	23266.4	19429.2	19097.7	16028.1	18859.8	24824.2	Uncharacterized protein OS=Oryctolagus cuniculus OX=9986 GN=YWHAE PE=3 SV=1	0.96632	-0.0494271	0.823712
U3KN21	1380.8	1153.1	1264.6	1159.2	1338.9	604.7	Dymeclin OS=Oryctolagus cuniculus OX=9986 GN=DYM PE=4 SV=1	0.816849	-0.291859	0.371357
G1SIA1	560.4	468	529.4	477.1	482.2	260.5	Kinesin family member 1B OS=Oryctolagus cuniculus OX=9986 GN=KIF1B PE=3 SV=1	0.783027	-0.352866	0.221856
G1SV81	1140.9	953	961	1025.1	1326.2	674.5	Dynactin subunit 5 OS=Oryctolagus cuniculus OX=9986 GN=DCTN5 PE=4 SV=1	0.990474	-0.013809	0.963285
G1SN35	238	198.8	209	251.2	266.6	269.9	Adaptor protein, phosphotyrosine interacting with PH domain and leucine zipper 2 OS=Oryctolagus cuniculus OX=9986 GN=APPL2 PE=4 SV=1	1.21973	0.286558	0.022431
G1SY18	148	123.7	139.4	157.3	154.9	147.6	Mitochondrial ribosomal protein L40 OS=Oryctolagus cuniculus OX=9986 GN=MRPL40 PE=4 SV=2	1.11846	0.161518	0.102337
G1U620	3169	2647.7	2714.1	3225.7	3139.3	2648.2	MER proto-oncogene, tyrosine kinase OS=Oryctolagus cuniculus OX=9986 GN=MERTK PE=3 SV=2	1.05655	0.0793583	0.544746
G1U6N2	17328.8	14479.8	16644.3	17850.1	15237.7	24244	60S acidic ribosomal protein P0 OS=Oryctolagus cuniculus OX=9986 PE=1 SV=1	1.18325	0.242752	0.351584
G1SMN3	800.4	669	721.7	827	746.4	566.8	IWS1, SUPT6H interacting protein OS=Oryctolagus cuniculus OX=9986 GN=IWS1 PE=4 SV=1	0.97677	-0.0339092	0.852986
G1SR56	1476.2	1233.9	953.8	837.4	744.4	588.5	DCN1-like protein OS=Oryctolagus cuniculus OX=9986 GN=DCUN1D5 PE=4 SV=1	0.592347	-0.755486	0.041044
G1U0G4	449.8	376	403.2	414	380.4	157.4	Cereblon OS=Oryctolagus cuniculus OX=9986 GN=CRBN PE=4 SV=2	0.774451	-0.368754	0.329792
G1SRF7	32777.9	27399.7	31434.7	34155.5	35411.6	44195.8	Heat shock protein family A (Hsp70) member 9 OS=Oryctolagus cuniculus OX=9986 GN=HSPA9 PE=3 SV=1	1.24179	0.312417	0.105881
G1SGV2	664.4	555.4	631.6	569.4	654	378.9	C-Maf inducing protein OS=Oryctolagus cuniculus OX=9986 GN=CMIP PE=4 SV=2	0.865453	-0.208473	0.396501
G1TX94	15866.4	13264	14621.3	17102.7	14524.6	19054.3	Uncharacterized protein OS=Oryctolagus cuniculus OX=9986 GN=MATR3 PE=4 SV=2	1.15839	0.212124	0.201238
G1SHI7	10576.8	8845.4	8997.4	7452.7	9009.8	5413.6	ArfGAP with SH3 domain, ankyrin repeat and PH domain 1 OS=Oryctolagus cuniculus OX=9986 GN=ASAP1 PE=4 SV=1	0.769754	-0.377531	0.138045
P29694	18726.1	15661	17104.4	16231.4	18049.9	15880.5	Elongation factor 1-gamma OS=Oryctolagus cuniculus OX=9986 GN=EEF1G PE=2 SV=3	0.974176	-0.0377457	0.710475
G1U9U0	19203.8	16063.6	16932.8	14882.1	17112	18797.5	T-complex protein 1 subunit delta OS=Oryctolagus cuniculus OX=9986 GN=CCT4 PE=3 SV=1	0.973015	-0.039466	0.765463
G1TFU8	868.4	726.6	930.7	934	847.4	873.1	Uncharacterized protein OS=Oryctolagus cuniculus OX=9986 PE=4 SV=2	1.051	0.0717572	0.548662
G1SN08	1105.2	924.8	1110.8	987.6	1081.4	1147.9	Replication factor C subunit 4 OS=Oryctolagus cuniculus OX=9986 GN=RFC4 PE=4 SV=2	1.02423	0.0345383	0.757665
G1TVN6	446.1	373.3	321	325	419.7	198.4	Tetratricopeptide repeat domain 39B OS=Oryctolagus cuniculus OX=9986 GN=TTC39B PE=4 SV=2	0.826991	-0.274056	0.422382
G1TMQ8	2058.1	1722.4	2050.9	2036.5	1966.7	2160.4	Calcium-transporting ATPase OS=Oryctolagus cuniculus OX=9986 GN=ATP2C1 PE=3 SV=2	1.05697	0.0799303	0.423573
G1TYV6	15155.5	12684.1	13297.7	16030.4	15815.9	14987.8	Cation-transporting ATPase OS=Oryctolagus cuniculus OX=9986 GN=ATP13A1 PE=3 SV=1	1.13848	0.187113	0.078527
G1U0Q7	8891.1	7441.3	7902.3	7582.1	8028.3	9245.5	Septin 2 OS=Oryctolagus cuniculus OX=9986 GN=SEPT2 PE=3 SV=2	1.02563	0.0365146	0.76796
G1TPT6	671.8	562.3	665.7	717.8	711.8	716.8	UTP6, small subunit processome component OS=Oryctolagus cuniculus OX=9986 GN=UTP6 PE=4 SV=2	1.1298	0.176071	0.08198
G1SQ32	4363.8	3652.8	4124.9	4230.2	4409.9	4544.4	RAS like proto-oncogene B OS=Oryctolagus cuniculus OX=9986 GN=RALB PE=4 SV=1	1.0859	0.118897	0.201762
G1SIJ2	16450.5	13772.9	16153.9	16658.3	16536.4	17084.9	Acetyl-CoA acetyltransferase 1 OS=Oryctolagus cuniculus OX=9986 GN=ACAT1 PE=3 SV=2	1.08414	0.116554	0.206477
G1U7Q6	1932.6	1618	1691.1	1379.4	1695.1	1162.7	Translin OS=Oryctolagus cuniculus OX=9986 GN=TSN PE=4 SV=1	0.808364	-0.306923	0.13876
G1TI02	406.3	340.2	357.7	335.7	307.6	439.4	PYM homolog 1, exon junction complex associated factor OS=Oryctolagus cuniculus OX=9986 GN=PYM1 PE=4 SV=2	0.980529	-0.0283678	0.880371
G1STM8	1601.3	1341.3	1514.6	1382.8	1338.3	1788.8	Cytoplasmic protein OS=Oryctolagus cuniculus OX=9986 GN=NCK1 PE=4 SV=1	1.01182	0.0169584	0.919086
G1SVI9	15581.6	13052.2	13203.1	15627.9	14771	16025.9	VAMP associated protein A OS=Oryctolagus cuniculus OX=9986 GN=VAPA PE=4 SV=1	1.10966	0.15012	0.164115
G1SLD1	1004.9	842	934.8	1120.9	1198.9	685.8	NADH dehydrogenase [ubiquinone] 1 alpha subcomplex subunit 2 OS=Oryctolagus cuniculus OX=9986 GN=NDUFA2 PE=4 SV=1	1.08049	0.111686	0.677101
G1ST00	927.3	777	875	852	876.1	604.6	RNA polymerase II associated protein 1 OS=Oryctolagus cuniculus OX=9986 GN=RPAP1 PE=4 SV=1	0.904393	-0.144978	0.445808
G1SCN8	28322.6	23735.4	25449.1	23218.1	26251	20093.9	T-complex protein 1 subunit gamma OS=Oryctolagus cuniculus OX=9986 GN=CCT3 PE=3 SV=2	0.897505	-0.156008	0.299789
G1SMR7	7848.9	6577.8	7328	8076.2	6983.4	10017.7	Uncharacterized protein OS=Oryctolagus cuniculus OX=9986 GN=RPL12 PE=1 SV=1	1.15273	0.205055	0.313275
G1SVC5	537.6	450.7	465	492.3	510.8	301	Uncharacterized protein OS=Oryctolagus cuniculus OX=9986 GN=DNAJC25 PE=4 SV=1	0.897337	-0.156278	0.529116
G1TWL4	15413.3	12921.4	14572.1	15636.7	14292.4	14624.3	40S ribosomal protein SA OS=Oryctolagus cuniculus OX=9986 GN=RPSA PE=1 SV=2	1.03838	0.0543289	0.547391
G1T9D6	4280.6	3588.9	3838.2	3709.3	4209.9	2990	Programmed cell death 10 OS=Oryctolagus cuniculus OX=9986 GN=PDCD10 PE=4 SV=1	0.931797	-0.101912	0.549507
G1U7V8	178.4	149.6	174.4	157.6	164.6	252.3	Tubulin alpha chain OS=Oryctolagus cuniculus OX=9986 PE=3 SV=1	1.14351	0.19347	0.491481
G1SXE5	580.6	487	575.5	513.8	573	1182.9	Rap guanine nucleotide exchange factor 2 OS=Oryctolagus cuniculus OX=9986 GN=RAPGEF2 PE=4 SV=2	1.38135	0.466081	0.388312
G1T150	907.4	761.2	852.6	829.7	898.4	928.3	Elongation of very long chain fatty acids protein 1 OS=Oryctolagus cuniculus OX=9986 GN=ELOVL1 PE=3 SV=1	1.05363	0.0753615	0.432373
G1THL4	895.5	751.2	789.3	671.8	906.1	847.2	Uncharacterized protein OS=Oryctolagus cuniculus OX=9986 GN=LOC100343655 PE=3 SV=1	0.995525	-0.00647055	0.967006
G1SR79	2099.7	1761.5	1912.2	1902.5	1826.5	2209.1	Ethylmalonyl-CoA decarboxylase 1 OS=Oryctolagus cuniculus OX=9986 GN=ECHDC1 PE=3 SV=2	1.02853	0.0405797	0.736989
G1TBT4	3423.6	2872.4	2973.5	3512	3475.9	2219	Uncharacterized protein OS=Oryctolagus cuniculus OX=9986 GN=RRAGC PE=4 SV=1	0.993247	-0.00977556	0.965817
G1SRH9	16846.5	14136.2	15152.4	18212.3	16680.9	20615	Heterogeneous nuclear ribonucleoprotein R OS=Oryctolagus cuniculus OX=9986 GN=HNRNPR PE=4 SV=1	1.20317	0.266836	0.088071
G1SVB0	7437.4	6241.2	6264.8	7098.8	5963.7	8957.6	40S ribosomal protein S7 OS=Oryctolagus cuniculus OX=9986 GN=RPS7 PE=1 SV=1	1.10413	0.14291	0.509849
G1T1T5	241.4	202.6	204.1	244.8	275.6	221	Solute carrier family 35 member A2 OS=Oryctolagus cuniculus OX=9986 GN=SLC35A2 PE=4 SV=1	1.14396	0.194035	0.199733
G1T2G6	500	419.6	477	455.5	502.3	363.2	Disco interacting protein 2 homolog B OS=Oryctolagus cuniculus OX=9986 GN=DIP2B PE=4 SV=2	0.945869	-0.0802877	0.622729
G1SIY8	266.2	223.4	292.4	252.7	290.3	306.4	Methyltransferase like 14 OS=Oryctolagus cuniculus OX=9986 GN=METTL14 PE=3 SV=1	1.08619	0.119275	0.430417
G1SV40	824.5	692	847.7	778.4	812.5	550.1	Component of oligomeric golgi complex 7 OS=Oryctolagus cuniculus OX=9986 GN=COG7 PE=4 SV=2	0.905592	-0.143067	0.47985
G1SZX4	7468.1	6268.6	6931	7958.8	7586.7	6512.2	Inositol 1,4,5-trisphosphate receptor type 2 OS=Oryctolagus cuniculus OX=9986 GN=ITPR2 PE=4 SV=2	1.06726	0.0939049	0.451045
G1U4T6	357.2	299.8	317.3	365.2	349.1	389.3	tRNA (adenine(58)-N(1))-methyltransferase catalytic subunit TRMT61A OS=Oryctolagus cuniculus OX=9986 GN=TRMT61A PE=3 SV=1	1.13271	0.17978	0.104738
G1SYN2	178.2	149.6	186.5	187	159	150.4	ITPR interacting domain containing 2 OS=Oryctolagus cuniculus OX=9986 GN=ITPRID2 PE=4 SV=1	0.965195	-0.0511077	0.723501
G1TZ19	2338.5	1963.2	2209.7	2744.5	2768.5	3716.3	Uncharacterized protein OS=Oryctolagus cuniculus OX=9986 GN=DIABLO PE=4 SV=2	1.41741	0.503253	0.055398
G1T2I4	32458	27251.2	29984	27432.2	29522.8	19627.9	Glutamyl-prolyl-tRNA synthetase OS=Oryctolagus cuniculus OX=9986 GN=EPRS PE=3 SV=1	0.853832	-0.227976	0.263926
G1SL97	1357.4	1139.7	1195.6	1262.4	1200.2	1015.5	Uncharacterized protein OS=Oryctolagus cuniculus OX=9986 GN=PUM3 PE=4 SV=1	0.941885	-0.0863772	0.509056
G1TWC3	8044.8	6754.3	7115.7	8052.6	7829.1	6768.1	Thioredoxin related transmembrane protein 1 OS=Oryctolagus cuniculus OX=9986 GN=TMX1 PE=4 SV=2	1.03354	0.0475928	0.680115
U3KNB6	11227	9427.6	9591	9184.2	9870	6253	Coatomer subunit delta OS=Oryctolagus cuniculus OX=9986 PE=3 SV=1	0.836723	-0.257178	0.25797
G1SYT2	67.4	56.6	52.8	58.9	55.6	153	Phosphorylated adaptor for RNA export OS=Oryctolagus cuniculus OX=9986 GN=PHAX PE=4 SV=1	1.51301	0.597421	0.401314
G1SY68	9362	7862.2	8739.5	9501.1	9161.1	9015.8	Uncharacterized protein OS=Oryctolagus cuniculus OX=9986 PE=4 SV=2	1.06603	0.092244	0.280372
G1SEX2	543	456	567.5	589.1	610.6	312.4	Interleukin 10 receptor subunit beta OS=Oryctolagus cuniculus OX=9986 GN=IL10RB PE=4 SV=2	0.965273	-0.0509911	0.867285
G1U636	7126.9	5985.4	5988.2	6438.4	6244.9	5049.7	Cell cycle associated protein 1 OS=Oryctolagus cuniculus OX=9986 GN=CAPRIN1 PE=4 SV=1	0.928405	-0.107174	0.473769
G1SNJ3	469.8	394.9	452.7	484	497.1	442.9	Mitochondrial ribosomal protein S36 OS=Oryctolagus cuniculus OX=9986 GN=MRPS36 PE=4 SV=2	1.08092	0.112256	0.272223
G1T594	4912.4	4129.1	4078.8	4550.5	5302.5	3918.5	Stromal interaction molecule 1 OS=Oryctolagus cuniculus OX=9986 GN=STIM1 PE=4 SV=2	1.04963	0.069885	0.676131
G1U643	1221.4	1026.7	1211.2	1069.5	1119.3	826.6	Armadillo repeat containing 6 OS=Oryctolagus cuniculus OX=9986 GN=ARMC6 PE=4 SV=1	0.871679	-0.198131	0.251056
G1TA59	9958	8370.7	10068.8	11387.7	11904.4	10395.8	Isocitrate dehydrogenase [NAD] subunit, mitochondrial OS=Oryctolagus cuniculus OX=9986 GN=IDH3A PE=3 SV=1	1.1863	0.246466	0.066625
G1SP32	7863.7	6610.5	7266.1	8774.5	8301.5	9431.5	3-hydroxyisobutyryl-CoA hydrolase, mitochondrial OS=Oryctolagus cuniculus OX=9986 GN=HIBCH PE=3 SV=1	1.21928	0.286028	0.031225
G1SPK4	2675	2248.8	2533.2	2635.7	2462.4	2988.2	60S acidic ribosomal protein P0 OS=Oryctolagus cuniculus OX=9986 GN=RPLP0 PE=3 SV=2	1.08439	0.116885	0.351469
G1SFK1	1236	1039.1	1091.8	907.7	1097.5	589.2	Acid sphingomyelinase-like phosphodiesterase OS=Oryctolagus cuniculus OX=9986 GN=SMPDL3A PE=3 SV=1	0.77056	-0.376021	0.181831
G1THS6	324.8	273	289.1	328.2	323.5	402.5	Transmembrane protein 41A OS=Oryctolagus cuniculus OX=9986 GN=TMEM41A PE=4 SV=1	1.18864	0.249306	0.134762
G1STH0	9949.8	8366	8952	9920.3	9572.1	7238	Splicing factor 3a subunit 1 OS=Oryctolagus cuniculus OX=9986 GN=SF3A1 PE=4 SV=1	0.980292	-0.0287165	0.861151
G1T7M0	4023.5	3383.2	3734.2	4192.6	3932.1	3731.9	Presenilin OS=Oryctolagus cuniculus OX=9986 GN=PSEN1 PE=3 SV=2	1.06424	0.0898249	0.354771
G1SH12	331.6	278.9	325.7	259.5	282.6	343.1	HD domain containing 3 OS=Oryctolagus cuniculus OX=9986 GN=HDDC3 PE=4 SV=1	0.945524	-0.080814	0.601064
G1U7J2	1165.5	980.1	1164	1257.7	1201.6	872.7	Methyl-CpG binding domain protein 2 OS=Oryctolagus cuniculus OX=9986 GN=MBD2 PE=4 SV=2	1.00677	0.00973127	0.958525
G1T9H7	3355.7	2822.5	3185.2	3263.2	3450.8	2397.3	Dedicator of cytokinesis 10 OS=Oryctolagus cuniculus OX=9986 GN=DOCK10 PE=3 SV=1	0.973076	-0.0393756	0.827142
G1T617	6443	5420.6	5801.2	6124	5866.6	5168	RNA binding motif protein 25 OS=Oryctolagus cuniculus OX=9986 GN=RBM25 PE=4 SV=1	0.971344	-0.0419458	0.703795
G1TCX6	3071.9	2584.9	3149.4	2811.7	2921.2	2022.7	SRP receptor subunit alpha OS=Oryctolagus cuniculus OX=9986 GN=SRPRA PE=1 SV=1	0.880698	-0.183281	0.353113
G1SD24	854.4	719.1	790.3	803.5	827.4	631.3	Poly(A)-specific ribonuclease OS=Oryctolagus cuniculus OX=9986 GN=PARN PE=4 SV=1	0.957018	-0.063382	0.667207
G1T568	11200.3	9426.2	9714.3	10550.3	10240.4	8114.8	Transportin 1 OS=Oryctolagus cuniculus OX=9986 GN=TNPO1 PE=4 SV=1	0.952694	-0.0699152	0.638378
G1SQP9	5844	4918.4	5319.6	5290.8	5425.2	3737.4	Catechol-O-methyltransferase OS=Oryctolagus cuniculus OX=9986 GN=COMT PE=4 SV=2	0.898732	-0.154037	0.419768
G1T7P9	2000.5	1683.7	2003.9	2007.2	2065.3	1677.8	Small nuclear ribonucleoprotein U5 subunit 40 OS=Oryctolagus cuniculus OX=9986 GN=SNRNP40 PE=4 SV=2	1.01093	0.0156902	0.90358
G1U9C1	16367.3	13776.3	15253.9	13346.5	15635.3	11424.7	Dynamin 2 OS=Oryctolagus cuniculus OX=9986 GN=DNM2 PE=3 SV=1	0.89006	-0.168026	0.309273
G1U886	368	309.8	398	371.9	408.8	514.8	AP complex subunit sigma OS=Oryctolagus cuniculus OX=9986 GN=AP1S1 PE=3 SV=1	1.20422	0.268099	0.217222
G1T6P5	8621.2	7256.8	8089	8675.8	8124.2	9748	ADP ribosylation factor like GTPase 8B OS=Oryctolagus cuniculus OX=9986 GN=ARL8B PE=3 SV=1	1.10769	0.147554	0.237795
G1TJ04	834.4	702.3	809.2	877.6	887.8	640.4	Lysophosphatidylcholine acyltransferase 4 OS=Oryctolagus cuniculus OX=9986 GN=LPCAT4 PE=4 SV=1	1.02553	0.0363753	0.836004
G1TA04	4986.5	4198.4	4560.1	4750.6	4857.7	3107	Pre-mRNA processing factor 19 OS=Oryctolagus cuniculus OX=9986 GN=PRPF19 PE=4 SV=1	0.925085	-0.112342	0.604053
G1TWK7	3213	2705.4	2916.9	3076.7	3131.8	4558.8	Mesoderm development LRP chaperone OS=Oryctolagus cuniculus OX=9986 GN=MESD PE=4 SV=1	1.21867	0.285305	0.272829
G1T7W2	6504.4	5477.1	6138.5	6014.1	6330.4	4018.2	Uncharacterized protein OS=Oryctolagus cuniculus OX=9986 GN=RTRAF PE=4 SV=1	0.903019	-0.147172	0.496367
G1SZW2	915.5	771	904.4	838.9	762.9	553.4	Rho guanine nucleotide exchange factor 11 OS=Oryctolagus cuniculus OX=9986 GN=ARHGEF11 PE=4 SV=2	0.831834	-0.265632	0.209345
G1SFH8	1156.1	974	988.2	852.6	1002.4	607.8	Phosducin like 3 OS=Oryctolagus cuniculus OX=9986 GN=PDCL3 PE=4 SV=2	0.789789	-0.340461	0.165604
P83468	1502.8	1266.1	1374.1	1191	1399	2053.5	14 kDa phosphohistidine phosphatase OS=Oryctolagus cuniculus OX=9986 GN=PHPT1 PE=1 SV=1	1.12081	0.164537	0.56833
G1TZM7	1148.9	968	1224.6	1119.2	965.7	663.6	RTF1 homolog, Paf1/RNA polymerase II complex component OS=Oryctolagus cuniculus OX=9986 GN=RTF1 PE=4 SV=1	0.822535	-0.281851	0.268521
G1T7B5	1111.8	936.7	1066.8	1019.8	1023.9	1624.3	DEAD-box helicase 47 OS=Oryctolagus cuniculus OX=9986 GN=DDX47 PE=3 SV=1	1.17742	0.235623	0.424916
P16258	8422.7	7099	7802.8	7899.5	8012.1	6088.4	Oxysterol-binding protein 1 OS=Oryctolagus cuniculus OX=9986 GN=OSBP PE=1 SV=1	0.943214	-0.084343	0.578572
G1TE20	5976.4	5037.8	5143	6063.3	6050.8	5247.1	Endoplasmic reticulum metallopeptidase 1 OS=Oryctolagus cuniculus OX=9986 GN=ERMP1 PE=4 SV=1	1.07452	0.10369	0.373874
G1T4M5	797.8	672.5	797	854.6	963.5	538.6	Plexin D1 OS=Oryctolagus cuniculus OX=9986 GN=PLXND1 PE=4 SV=1	1.03943	0.0557926	0.834968
G1TF92	7526.9	6345.3	6584.9	6322.7	6271.7	6614.7	DENN domain containing 4C OS=Oryctolagus cuniculus OX=9986 GN=DENND4C PE=4 SV=1	0.938994	-0.0908122	0.330761
G1SNY9	862.9	727.5	845.3	814.5	804.1	880.7	NLR family pyrin domain containing 3 OS=Oryctolagus cuniculus OX=9986 GN=NLRP3 PE=4 SV=2	1.02611	0.0371882	0.686427
G1SHN4	1741.8	1468.5	1653	1581.3	1581.2	1322.7	Component of oligomeric golgi complex 3 OS=Oryctolagus cuniculus OX=9986 GN=COG3 PE=4 SV=2	0.922254	-0.116764	0.345387
G1T473	4165.9	3512.4	3786.5	3860.8	3815.2	3055.6	LIM domain and actin binding 1 OS=Oryctolagus cuniculus OX=9986 GN=LIMA1 PE=4 SV=1	0.936048	-0.0953456	0.490904
G1TP80	646.4	545	585.3	473.5	330.9	153.9	Uncharacterized protein OS=Oryctolagus cuniculus OX=9986 PE=3 SV=1	0.539371	-0.89065	0.048235
G1TU13	8530.1	7192.3	7105.2	7177.6	7076.9	14325.5	Uncharacterized protein OS=Oryctolagus cuniculus OX=9986 GN=RPS17 PE=1 SV=1	1.25199	0.324226	0.476486
G1T4V0	212.9	179.6	224.1	221.7	209.2	182.6	Zinc finger MYM-type containing 4 OS=Oryctolagus cuniculus OX=9986 GN=ZMYM4 PE=4 SV=1	0.994972	-0.00727217	0.956121
G1SQV5	3385.9	2855.5	3291.8	3042.7	3274	2549.5	Eukaryotic translation initiation factor 3 subunit D OS=Oryctolagus cuniculus OX=9986 GN=EIF3D PE=3 SV=1	0.930034	-0.104645	0.45491
G1SM99	3101.5	2615.7	3431.2	3513	3419.2	2309.8	Alpha-(1,6)-fucosyltransferase OS=Oryctolagus cuniculus OX=9986 GN=FUT8 PE=3 SV=1	1.01023	0.0146852	0.948418
G1SRH8	1834.3	1547.1	1695.7	1597.6	1542.9	1027.5	GA binding protein transcription factor subunit alpha OS=Oryctolagus cuniculus OX=9986 GN=GABPA PE=3 SV=1	0.820941	-0.28465	0.20365
G1SUT1	252.7	213.1	232.8	220.5	242.1	251.5	Methyltransferase like 13 OS=Oryctolagus cuniculus OX=9986 GN=METTL13 PE=4 SV=1	1.02219	0.0316591	0.74229
G1TZB9	266.6	224.9	249.8	251.3	236	297.2	Transformer 2 alpha homolog OS=Oryctolagus cuniculus OX=9986 GN=TRA2A PE=4 SV=2	1.05828	0.0817159	0.548825
G1TPZ1	9677.6	8163.3	9173.9	8502.2	10876.4	13700.1	Galectin OS=Oryctolagus cuniculus OX=9986 GN=LGALS1 PE=4 SV=1	1.22447	0.292153	0.266592
G1T188	10307.2	8695	10409.2	10430.4	9422.9	6215	GTP:AMP phosphotransferase AK3, mitochondrial OS=Oryctolagus cuniculus OX=9986 GN=AK3 PE=3 SV=1	0.886333	-0.174079	0.466724
G1T7S1	3406.1	2873.7	3114.3	2720.6	3384.4	2006.1	Uncharacterized protein OS=Oryctolagus cuniculus OX=9986 GN=LOC100353185 PE=4 SV=2	0.863425	-0.211857	0.372931
G1SVZ8	2902.4	2448.8	2612.5	2269.1	2569.3	1382.1	Queuosine salvage protein OS=Oryctolagus cuniculus OX=9986 GN=C9orf64 PE=3 SV=1	0.781107	-0.356408	0.201227
G1SLI9	3984.3	3362.4	4029.9	3857.1	3668.1	2470.6	Oxysterol-binding protein OS=Oryctolagus cuniculus OX=9986 GN=OSBPL9 PE=3 SV=1	0.878628	-0.186676	0.395975
G1SKF5	3150.8	2659.1	2979	3117.1	3067.1	2099.6	Erbb2 interacting protein OS=Oryctolagus cuniculus OX=9986 GN=ERBIN PE=4 SV=2	0.94253	-0.0853896	0.665315
G1T2V2	5175.6	4368.3	4875.3	3827.8	4651.7	3550.9	Uncharacterized protein OS=Oryctolagus cuniculus OX=9986 GN=PAICS PE=3 SV=1	0.834332	-0.261307	0.121342
G1SEX6	1489.7	1257.4	1367.4	1381.3	1424.4	1383.4	DEAH-box helicase 36 OS=Oryctolagus cuniculus OX=9986 GN=DHX36 PE=4 SV=1	1.01813	0.0259232	0.735115
G1SNB4	844.6	712.9	689.4	649.1	943.5	398.5	Uncharacterized protein OS=Oryctolagus cuniculus OX=9986 PE=4 SV=2	0.886154	-0.174371	0.632047
G1SKM5	7116.7	6006.9	6458.3	6611.3	6629.7	5024.3	NPL4 homolog, ubiquitin recognition factor OS=Oryctolagus cuniculus OX=9986 GN=NPLOC4 PE=4 SV=1	0.932764	-0.100416	0.51941
G1TVS8	8462.9	7144.5	9107	8304.5	6969	8094.3	Uncharacterized protein OS=Oryctolagus cuniculus OX=9986 PE=4 SV=1	0.945514	-0.0808293	0.562093
G1SRB7	3255.5	2748.4	3116.8	3233.7	3155.8	2724.6	Tripeptidyl peptidase 1 OS=Oryctolagus cuniculus OX=9986 GN=TPP1 PE=4 SV=1	0.999276	-0.00104489	0.992466
G1T846	15049.1	12706	13119.1	12775.7	13662.7	9242.1	Aspartyl-tRNA synthetase OS=Oryctolagus cuniculus OX=9986 GN=DARS PE=3 SV=2	0.872935	-0.196054	0.321397
G1T047	1038.1	876.6	904.4	944.5	896.3	546.5	Dicer 1, ribonuclease III OS=Oryctolagus cuniculus OX=9986 GN=DICER1 PE=3 SV=1	0.846831	-0.239854	0.346271
G1TA05	1556.8	1314.6	1394.3	1539	1604.8	1414	Tripartite motif containing 26 OS=Oryctolagus cuniculus OX=9986 GN=TRIM26 PE=4 SV=1	1.06848	0.0955545	0.343061
G1STU0	1012.9	855.4	1011.6	940.3	943.5	728.6	WD repeat domain 77 OS=Oryctolagus cuniculus OX=9986 GN=WDR77 PE=4 SV=1	0.907115	-0.140643	0.369511
G1SQ29	515.5	435.4	471.4	502.1	527.4	492.9	High mobility group box 3 OS=Oryctolagus cuniculus OX=9986 GN=HMGB3 PE=4 SV=1	1.07038	0.0981217	0.258531
G1SYP6	307.4	259.6	293.8	288.5	314.3	250.4	WD repeat and FYVE domain containing 2 OS=Oryctolagus cuniculus OX=9986 GN=WDFY2 PE=4 SV=1	0.991171	-0.0127941	0.918935
G1TDI0	22832.4	19283.7	18485.3	22046.9	22560	23371.4	Uncharacterized protein OS=Oryctolagus cuniculus OX=9986 GN=PA2G4 PE=4 SV=1	1.12173	0.165723	0.151727
G1TFR5	1557.1	1315.3	1497.4	1602.5	1499.7	1503.9	Uncharacterized protein OS=Oryctolagus cuniculus OX=9986 GN=NRBP1 PE=4 SV=2	1.05408	0.0759789	0.381128
G1U2U9	7937.7	6706.6	7108.8	7636	7478.4	4114	Vac14, PIKFYVE complex component OS=Oryctolagus cuniculus OX=9986 GN=VAC14 PE=4 SV=2	0.883938	-0.177983	0.523225
G1TBU8	7591	6414.7	6764	5508.5	6433	4107	Rap1 GTPase-GDP dissociation stimulator 1 OS=Oryctolagus cuniculus OX=9986 GN=RAP1GDS1 PE=4 SV=2	0.772688	-0.372042	0.107411
G1SHT4	1867.4	1578.1	1360.5	1342.2	1644.3	1142.7	Spermidine/spermine N1-acetyltransferase family member 2 OS=Oryctolagus cuniculus OX=9986 GN=SAT2 PE=4 SV=1	0.859176	-0.218974	0.336862
G1TFZ5	14640.8	12374.7	14478	15210.1	14976.8	11377.7	Flotillin 2 OS=Oryctolagus cuniculus OX=9986 GN=FLOT2 PE=4 SV=2	1.00171	0.00247066	0.98765
G1SE64	29538.1	24967.8	27586.7	31171	29525.9	22258.5	Dedicator of cytokinesis 2 OS=Oryctolagus cuniculus OX=9986 GN=DOCK2 PE=3 SV=1	1.01051	0.0150836	0.929212
G1SE92	1115.2	942.6	1086.6	1218.8	1078.9	1710.4	XPA binding protein 2 OS=Oryctolagus cuniculus OX=9986 GN=XAB2 PE=4 SV=1	1.27468	0.350134	0.221134
G1TB34	3216.3	2719	2961.9	2875.3	2479.6	3727.1	Atlastin GTPase 2 OS=Oryctolagus cuniculus OX=9986 GN=ATL2 PE=4 SV=1	1.02077	0.0296592	0.883647
G1TST9	7375.1	6234.7	7562.3	7341.5	7081	5821.2	Uncharacterized protein OS=Oryctolagus cuniculus OX=9986 GN=CHD4 PE=4 SV=1	0.95615	-0.0646911	0.647213
G1SHV3	2951	2494.9	2972.1	3146.2	2808.1	1948	RAD21 cohesin complex component OS=Oryctolagus cuniculus OX=9986 GN=RAD21 PE=4 SV=2	0.938738	-0.0912055	0.681518
G1TDA7	3543.3	2995.9	3402.8	3552.9	3370	4250	Cell division cycle 5 like OS=Oryctolagus cuniculus OX=9986 GN=CDC5L PE=4 SV=2	1.12381	0.168396	0.261838
G1SFG6	23744.7	20081.3	20308.1	14752	18534.7	14081.6	Glucose-6-phosphate isomerase OS=Oryctolagus cuniculus OX=9986 GN=GPI PE=3 SV=1	0.738582	-0.43717	0.0375
G1TC28	452.5	382.8	356.9	417.2	363.9	464.5	Kinesin family member 21A OS=Oryctolagus cuniculus OX=9986 GN=KIF21A PE=3 SV=2	1.04479	0.0632144	0.684681
G1TSL1	8818	7458.6	8528.4	9689.4	9478.6	13908.2	Isocitrate dehydrogenase [NAD] subunit, mitochondrial OS=Oryctolagus cuniculus OX=9986 GN=IDH3B PE=3 SV=1	1.33345	0.415163	0.140064
G1SET3	499.9	423	405.7	451.3	489.9	373.6	Ras homolog family member Q OS=Oryctolagus cuniculus OX=9986 GN=RHOQ PE=4 SV=2	0.989613	-0.0150636	0.923173
G1SFI7	2682	2269.7	2464.4	2264.6	2678.5	1599.5	Guanine monophosphate synthase OS=Oryctolagus cuniculus OX=9986 GN=GMPS PE=4 SV=1	0.882216	-0.180796	0.435174
G1SQP2	269.1	227.7	247	254.8	256.6	179.5	HPS4, biogenesis of lysosomal organelles complex 3 subunit 2 OS=Oryctolagus cuniculus OX=9986 GN=HPS4 PE=4 SV=2	0.928879	-0.106437	0.564093
G1SCJ4	654	553.5	716.7	669	743.5	544.4	Pleckstrin homology domain containing A2 OS=Oryctolagus cuniculus OX=9986 GN=PLEKHA2 PE=4 SV=1	1.01699	0.0243112	0.891547
G1SCM7	736.5	623.3	730.4	692.6	670.7	655.5	Phosphate cytidylyltransferase 1, choline, alpha OS=Oryctolagus cuniculus OX=9986 GN=PCYT1A PE=4 SV=2	0.965841	-0.0501424	0.568026
G1SQD1	23269.9	19697	21627.2	18302.8	19613.2	13401.9	Eukaryotic translation initiation factor 4 gamma 1 OS=Oryctolagus cuniculus OX=9986 GN=EIF4G1 PE=4 SV=2	0.794467	-0.331941	0.109117
G1SE28	5047.6	4273.2	5372.8	4555.7	3763.4	5057.6	Ribosomal protein L24 OS=Oryctolagus cuniculus OX=9986 GN=RPL24 PE=1 SV=1	0.910376	-0.135466	0.428093
G1SHD4	5005.3	4237.5	4386.2	4586.7	4740.5	2626.8	Rho GTPase activating protein 30 OS=Oryctolagus cuniculus OX=9986 GN=ARHGAP30 PE=4 SV=1	0.8771	-0.189187	0.481278
G1U3B8	4569.1	3868.4	3705.9	3374.4	4122.4	2186.5	Thioredoxin like 1 OS=Oryctolagus cuniculus OX=9986 GN=TXNL1 PE=4 SV=1	0.797413	-0.326601	0.258286
G1T3X2	3794.7	3213	3796.4	3952.5	3332.9	3290.3	Histone deacetylase complex subunit SAP18 OS=Oryctolagus cuniculus OX=9986 GN=SAP18 PE=3 SV=1	0.97886	-0.0308256	0.805201
G1TEH2	10844.5	9182.4	9687.7	10504.4	12512.8	9615.5	V-type proton ATPase subunit C OS=Oryctolagus cuniculus OX=9986 GN=ATP6V1C1 PE=3 SV=2	1.0982	0.135146	0.380646
G1TWL0	8842.8	7487.7	8135	9328	8886.5	12230.4	Heterogeneous nuclear ribonucleoprotein A2/B1 OS=Oryctolagus cuniculus OX=9986 GN=HNRNPA2B1 PE=4 SV=1	1.2444	0.315451	0.149603
G1SWF6	10605.7	8980.5	11457.3	8570.6	9453.5	9368.8	Haptoglobin OS=Oryctolagus cuniculus OX=9986 GN=HP PE=3 SV=1	0.882404	-0.180489	0.193326
G1TSL5	983.9	833.2	921.2	844.9	916	832.6	Ubiquitin recognition factor in ER associated degradation 1 OS=Oryctolagus cuniculus OX=9986 GN=UFD1 PE=4 SV=1	0.94712	-0.0783809	0.396292
G1SKK0	3336	2825.1	3095.4	2401.7	2927.3	2420.8	Trifunctional purine biosynthetic protein adenosine-3 OS=Oryctolagus cuniculus OX=9986 GN=GART PE=3 SV=2	0.837228	-0.256308	0.091083
G1TI40	8082.1	6844.6	7248.4	8038.8	7713.1	6826.9	Small nuclear ribonucleoprotein Sm D2 OS=Oryctolagus cuniculus OX=9986 GN=SNRPD2 PE=3 SV=2	1.01821	0.0260281	0.806286
G1SIU3	205	173.6	200.6	190.5	196.7	155.7	Thioredoxin interacting protein OS=Oryctolagus cuniculus OX=9986 GN=TXNIP PE=4 SV=1	0.937327	-0.0933757	0.494079
G1SV05	26876.2	22767.6	24788.6	22140.3	24280.2	15238.9	Heat shock protein family A (Hsp70) member 4 OS=Oryctolagus cuniculus OX=9986 GN=HSPA4 PE=3 SV=2	0.828395	-0.271609	0.225595
G1TUA3	15954.7	13516.6	14075.7	15791.1	15670.2	24188	Uncharacterized protein OS=Oryctolagus cuniculus OX=9986 PE=3 SV=1	1.27791	0.353791	0.238485
G1SJN5	7569.5	6412.8	6609.7	8265.3	7514.6	6694.7	Alpha-mannosidase OS=Oryctolagus cuniculus OX=9986 GN=MAN2A1 PE=3 SV=2	1.09142	0.126212	0.338204
G1U6R0	1705.7	1445.3	1579.4	1760.3	1620.6	1405.5	Nucleoporin 58 OS=Oryctolagus cuniculus OX=9986 GN=NUP58 PE=4 SV=1	1.01184	0.0169783	0.890831
G1T2W1	9010	7634.8	8232.6	7364.7	7532.4	9987.3	Signal recognition particle subunit SRP72 OS=Oryctolagus cuniculus OX=9986 GN=SRP72 PE=3 SV=2	1.00028	0.00040534	0.998131
G1U150	5288.4	4481.5	5163.5	5711.7	5633.9	5031.5	Mitochondrial import inner membrane translocase subunit TIM44 OS=Oryctolagus cuniculus OX=9986 GN=TIMM44 PE=3 SV=1	1.09668	0.133137	0.218822
G1SSL8	562.8	477	495	520	491	339.6	HEAT repeat containing 5A OS=Oryctolagus cuniculus OX=9986 GN=HEATR5A PE=4 SV=2	0.879984	-0.184451	0.376199
G1SKQ9	1465	1241.6	1628.5	1419	1889.2	1538.8	Septin 6 OS=Oryctolagus cuniculus OX=9986 GN=SEPT6 PE=3 SV=2	1.11808	0.161027	0.397323
G1T138	2086	1768	1796.5	1629.6	1935.5	1697.4	Src kinase associated phosphoprotein 2 OS=Oryctolagus cuniculus OX=9986 GN=SKAP2 PE=4 SV=2	0.931334	-0.102629	0.40035
G1SY47	2341	1984.2	2055.7	1846.7	1955.7	1544.7	Uncharacterized protein OS=Oryctolagus cuniculus OX=9986 GN=THUMPD1 PE=4 SV=1	0.837985	-0.255004	0.10394
G1SSP0	3578.5	3033.6	3055.7	3068.3	3192.7	3139.6	Striatin OS=Oryctolagus cuniculus OX=9986 GN=STRN PE=4 SV=1	0.972362	-0.0404346	0.64963
G1T2J2	52.8	44.7	50.4	44.6	43.7	42.3	Timeless circadian regulator OS=Oryctolagus cuniculus OX=9986 GN=TIMELESS PE=4 SV=2	0.883029	-0.179467	0.081795
G1TES6	7772.6	6591.6	7288.5	7228.4	7632	7017.8	Hydroxysteroid 17-beta dehydrogenase 10 OS=Oryctolagus cuniculus OX=9986 GN=HSD17B10 PE=3 SV=1	1.01041	0.0149465	0.855552
G1T593	2014.5	1708.7	1765.7	1760.2	1806	1400.4	Coatomer protein complex subunit zeta 1 OS=Oryctolagus cuniculus OX=9986 GN=COPZ1 PE=4 SV=2	0.904844	-0.144259	0.334884
G1SYN9	531	450.5	509.7	447.3	438.4	576	Histone deacetylase OS=Oryctolagus cuniculus OX=9986 GN=HDAC6 PE=4 SV=2	0.980217	-0.0288269	0.855274
G1SYI3	3856.1	3271.6	3401	3952	3937.9	2471.1	Ubiquitin specific peptidase 39 OS=Oryctolagus cuniculus OX=9986 GN=USP39 PE=4 SV=1	0.984072	-0.0231642	0.91992
G1SVK5	10359.5	8789.5	9394.6	9055.9	12819.3	21107.9	Protein S100 OS=Oryctolagus cuniculus OX=9986 GN=S100A4 PE=3 SV=1	1.50588	0.590602	0.250996
G1SSM6	6430	5456.3	6448.6	6786.5	5931.9	4735	Nucleoporin 133 OS=Oryctolagus cuniculus OX=9986 GN=NUP133 PE=4 SV=1	0.951922	-0.0710847	0.687615
G1SLX9	2955.8	2508.4	2683.3	2411.6	2403.4	1344.5	Transforming acidic coiled-coil containing protein 1 OS=Oryctolagus cuniculus OX=9986 GN=TACC1 PE=4 SV=1	0.755999	-0.403544	0.154037
P43236	3923.2	3330.3	3881.5	4313.5	4341.5	6031.4	Cathepsin K OS=Oryctolagus cuniculus OX=9986 GN=CTSK PE=1 SV=1	1.31894	0.399379	0.11944
G1T139	6033.1	5121.3	5868	6417.5	6424.9	8037.5	Uncharacterized protein OS=Oryctolagus cuniculus OX=9986 PE=4 SV=2	1.22661	0.29468	0.101697
G1T574	580.9	493.3	576.3	575.8	618.8	625.3	Uncharacterized protein OS=Oryctolagus cuniculus OX=9986 PE=4 SV=1	1.10264	0.140957	0.156576
G1SG29	2968.9	2521.8	2298.3	2142.4	2728.7	1732	Uncharacterized protein OS=Oryctolagus cuniculus OX=9986 PE=3 SV=1	0.847747	-0.238294	0.321874
G1SY85	698.7	593.5	727.9	707.6	636.2	336.9	Adaptor related protein complex 3 subunit mu 1 OS=Oryctolagus cuniculus OX=9986 GN=AP3M1 PE=3 SV=1	0.831989	-0.265364	0.401541
G1SIW1	9488.3	8059.4	9636.5	9395.3	9175.2	8507.2	DEAH-box helicase 15 OS=Oryctolagus cuniculus OX=9986 GN=DHX15 PE=4 SV=1	0.996082	-0.00566358	0.953272
G1SCS9	281.2	238.8	277.3	256.5	280.4	781	Uncharacterized protein OS=Oryctolagus cuniculus OX=9986 GN=RBM27 PE=4 SV=1	1.65295	0.725047	0.3689
G1TK74	172.8	146.8	157	183.5	180.4	191.7	Uncharacterized protein OS=Oryctolagus cuniculus OX=9986 GN=LOC100343752 PE=4 SV=2	1.16576	0.221267	0.033531
G1SPW1	6200.1	5267.2	6193.1	6192.4	5877.9	5164.3	PDS5 cohesin associated factor A OS=Oryctolagus cuniculus OX=9986 GN=PDS5A PE=4 SV=1	0.97589	-0.0352096	0.760119
G1T5J6	2614.3	2221.1	1957.5	2842.9	2587.9	8839	Microsomal glutathione S-transferase 1 OS=Oryctolagus cuniculus OX=9986 GN=MGST1 PE=4 SV=1	2.10069	1.07087	0.291208
G1TB71	12770.1	10851	11680.7	10673.7	11460.3	8458.9	Cytoskeleton associated protein 5 OS=Oryctolagus cuniculus OX=9986 GN=CKAP5 PE=4 SV=1	0.86661	-0.206545	0.211539
G1U2I3	1094.2	929.9	991	955.1	1073.8	580.3	Myotubularin related protein 14 OS=Oryctolagus cuniculus OX=9986 GN=MTMR14 PE=4 SV=1	0.865378	-0.208598	0.435398
G1U5G2	768.4	653.1	757.5	802.5	824	438.5	Cap methyltransferase 1 OS=Oryctolagus cuniculus OX=9986 GN=CMTR1 PE=4 SV=2	0.947682	-0.0775251	0.785158
G1T888	8986.3	7638.2	9448	8096.3	8080.6	6232.9	Ankyrin repeat and FYVE domain containing 1 OS=Oryctolagus cuniculus OX=9986 GN=ANKFY1 PE=4 SV=2	0.859519	-0.218399	0.212109
U3KN73	4393	3734.1	3591.8	4049.8	4670.4	2936.9	Vacuolar protein sorting-associated protein 29 OS=Oryctolagus cuniculus OX=9986 GN=VPS29 PE=3 SV=1	0.994726	-0.00762891	0.972612
G1T3M5	2848.6	2421.5	2559.1	2588.1	2549.8	1785.5	Uncharacterized protein OS=Oryctolagus cuniculus OX=9986 GN=EEF1E1 PE=4 SV=1	0.884305	-0.177384	0.356758
G1SVU1	422.9	359.5	387.7	356.9	365.7	260.6	BRCA2 and CDKN1A-interacting protein OS=Oryctolagus cuniculus OX=9986 GN=BCCIP PE=3 SV=1	0.84027	-0.251075	0.179448
G1U9T2	8878	7547	8308.6	8147	7776.3	5319.1	Serine/threonine-protein phosphatase OS=Oryctolagus cuniculus OX=9986 GN=PPP3CA PE=3 SV=1	0.858848	-0.219525	0.295359
G1SQ88	1725	1466.5	1567.9	1821.5	1577.1	1056	DNA-directed RNA polymerase subunit beta OS=Oryctolagus cuniculus OX=9986 GN=POLR1B PE=3 SV=1	0.935958	-0.0954843	0.691357
G1TA41	1384.7	1177.3	1214.2	1275.7	1344.8	1560.4	TAO kinase 1 OS=Oryctolagus cuniculus OX=9986 GN=TAOK1 PE=4 SV=1	1.10717	0.146878	0.275605
G1TF82	1281.4	1089.5	1262.4	1015.8	1145	599.6	Uncharacterized protein OS=Oryctolagus cuniculus OX=9986 GN=LOC100353962 PE=4 SV=1	0.75975	-0.396403	0.172687
G1SZ12	7468.5	6350	7976	7288.6	5852.6	6419.1	Ribosomal protein L14 OS=Oryctolagus cuniculus OX=9986 GN=RPL14 PE=1 SV=1	0.897488	-0.156035	0.306916
G1SG41	5749.3	4888.8	5235.8	5928.9	5750.9	7350	Transducin beta like 2 OS=Oryctolagus cuniculus OX=9986 GN=TBL2 PE=4 SV=1	1.19881	0.261604	0.135766
G1TQS9	43600.3	37076.1	43109	38505.1	46925.4	37472.9	Ribosome binding protein 1 OS=Oryctolagus cuniculus OX=9986 GN=RRBP1 PE=4 SV=1	0.992875	-0.010316	0.93976
G1U1E5	7203.3	6125.8	6398.3	6553.6	6619.5	4628.2	Coiled-coil domain containing 22 OS=Oryctolagus cuniculus OX=9986 GN=CCDC22 PE=4 SV=1	0.902364	-0.148219	0.428085
G1T1G0	701.9	597.1	651.3	704.4	609.9	515.1	Uncharacterized protein OS=Oryctolagus cuniculus OX=9986 PE=4 SV=2	0.93801	-0.0923248	0.553961
G1SV75	4612.5	3924.3	3374.7	4033.3	4648.9	2877	Acyl carrier protein OS=Oryctolagus cuniculus OX=9986 GN=NDUFAB1 PE=3 SV=1	0.970424	-0.0433129	0.861385
G1TKX5	4888.5	4159.2	4259.3	4705.5	5320.3	3128.2	Uncharacterized protein OS=Oryctolagus cuniculus OX=9986 PE=3 SV=2	0.988502	-0.0166842	0.944754
G1T6S0	2630	2237.7	2561.8	3026.2	2550.1	2211.4	Tropomyosin alpha-1 chain OS=Oryctolagus cuniculus OX=9986 GN=TPM1 PE=3 SV=2	1.04821	0.0679319	0.676214
G1SJ93	1836	1562.4	1953.2	1735.6	2132.6	1017.3	Poly(ADP-ribose) polymerase family member 12 OS=Oryctolagus cuniculus OX=9986 GN=PARP12 PE=4 SV=2	0.912905	-0.131463	0.676927
G1SJN8	1014.6	863.7	984.1	1028.4	974.6	429.4	RELT like 1 OS=Oryctolagus cuniculus OX=9986 GN=RELL1 PE=4 SV=1	0.849776	-0.234845	0.506763
G1SI71	255.8	217.8	197.5	204.4	182.4	209.4	Poly(A) binding protein interacting protein 1 OS=Oryctolagus cuniculus OX=9986 GN=PAIP1 PE=4 SV=2	0.888392	-0.170732	0.25897
G1TBC1	69071	58811.3	61842.5	67579.3	62184.1	85420.5	Endoplasmin OS=Oryctolagus cuniculus OX=9986 GN=HSP90B1 PE=3 SV=1	1.13419	0.181662	0.329617
G1T4K9	2193.7	1868	2127.7	2290.5	2286.1	1528.7	Heat shock protein family A (Hsp70) member 13 OS=Oryctolagus cuniculus OX=9986 GN=HSPA13 PE=3 SV=1	0.986412	-0.0197377	0.922878
G1T8E2	851.2	724.9	859.1	821.9	837	517.8	Glycogen synthase kinase 3 beta OS=Oryctolagus cuniculus OX=9986 GN=GSK3B PE=1 SV=1	0.893849	-0.161897	0.487139
G1SJS0	276.4	235.5	245	212.2	233.7	316.8	DNA primase OS=Oryctolagus cuniculus OX=9986 GN=PRIM1 PE=3 SV=1	1.00766	0.0110132	0.957635
G1T8B3	486.1	414	475.2	510	453.9	565.3	Proline, glutamate and leucine rich protein 1 OS=Oryctolagus cuniculus OX=9986 GN=PELP1 PE=4 SV=2	1.1119	0.153031	0.260903
G1SH10	14437	12298.1	13895.2	14894.7	13445.8	17214.1	Nuclear pore complex protein Nup93 OS=Oryctolagus cuniculus OX=9986 GN=NUP93 PE=3 SV=1	1.1212	0.165041	0.266263
G1SZY1	104.5	89	117.9	110.8	96.1	108.8	INO80 complex subunit OS=Oryctolagus cuniculus OX=9986 GN=INO80 PE=4 SV=2	1.01381	0.0197859	0.887782
G1SYC7	74.3	63.3	78.2	72.4	68.4	66.5	KIAA1522 OS=Oryctolagus cuniculus OX=9986 GN=KIAA1522 PE=4 SV=1	0.960612	-0.0579743	0.585835
G1T3C2	5288.1	4506.4	4918.9	4519.5	5071.3	3287	Neurobeachin like 2 OS=Oryctolagus cuniculus OX=9986 GN=NBEAL2 PE=4 SV=1	0.875243	-0.192244	0.346295
G1U0X0	5002.3	4262.9	4972	5299.9	4654.6	3329.2	Deltex E3 ubiquitin ligase 3L OS=Oryctolagus cuniculus OX=9986 GN=DTX3L PE=4 SV=2	0.933028	-0.100008	0.639593
P62160	22452	19135.1	19826.5	18292.9	21025.5	42619.2	Calmodulin OS=Oryctolagus cuniculus OX=9986 GN=CALM PE=1 SV=2	1.33419	0.415967	0.427772
G1SQI0	1544.5	1316.4	1537.4	1693.9	1474.4	898.8	Far upstream element binding protein 3 OS=Oryctolagus cuniculus OX=9986 GN=FUBP3 PE=4 SV=2	0.924698	-0.112946	0.679968
G1T536	10397.2	8863.8	9386.1	10535.7	10100	8786.4	Tet methylcytosine dioxygenase 1 OS=Oryctolagus cuniculus OX=9986 GN=TET1 PE=4 SV=1	1.02705	0.0385106	0.727891
G1SZ35	1754.4	1496.3	1456.3	1419.4	1610.4	973	Uncharacterized protein OS=Oryctolagus cuniculus OX=9986 GN=CHMP3 PE=3 SV=1	0.850393	-0.233798	0.327679
U3KMZ3	9775.1	8339.1	8070.9	7151.3	8731.7	4488.1	5-aminoimidazole-4-carboxamide ribonucleotide formyltransferase/IMP cyclohydrolase OS=Oryctolagus cuniculus OX=9986 GN=ATIC PE=3 SV=1	0.777965	-0.362223	0.223485
G1TBV4	3033.6	2587.9	2820.9	2519.7	2496	1816.4	DNA helicase OS=Oryctolagus cuniculus OX=9986 GN=MCM6 PE=3 SV=1	0.80926	-0.305325	0.111876
G1T9M9	66425.6	56668.4	58446.2	57899.5	58493.5	93271.6	Heat shock protein family A (Hsp70) member 8 OS=Oryctolagus cuniculus OX=9986 GN=HSPA8 PE=3 SV=1	1.15492	0.207794	0.480764
G1TYU5	535.9	457.2	506	458.8	472.9	340.8	Queuine tRNA-ribosyltransferase OS=Oryctolagus cuniculus OX=9986 GN=QTRT1 PE=3 SV=1	0.848843	-0.23643	0.188851
G1U611	4346.1	3708.2	3787.4	4263.7	4165.3	3064.3	Uncharacterized protein OS=Oryctolagus cuniculus OX=9986 PE=4 SV=1	0.970579	-0.0430824	0.802116
G1T5N7	1794.3	1531.3	1789.4	1984.7	1732.9	2089.2	Granulin precursor OS=Oryctolagus cuniculus OX=9986 GN=GRN PE=4 SV=1	1.13525	0.183009	0.16725
G1T0Z6	2451.2	2091.8	2143.2	2098	2252.9	1132.4	RBR-type E3 ubiquitin transferase OS=Oryctolagus cuniculus OX=9986 GN=ARIH1 PE=3 SV=1	0.820092	-0.286142	0.337223
G1U3V1	486.7	415.5	388.3	372.1	419.4	282.2	Uncharacterized protein OS=Oryctolagus cuniculus OX=9986 PE=4 SV=1	0.832003	-0.265339	0.220342
U3KNQ7	6246.8	5332.8	5804.1	6430.5	6216.8	5027.7	DEAD-box helicase 23 OS=Oryctolagus cuniculus OX=9986 GN=DDX23 PE=4 SV=1	1.01676	0.0239749	0.858262
G1TCI8	287	245	285.5	316.4	311.7	164.1	WD repeat domain 45B OS=Oryctolagus cuniculus OX=9986 GN=WDR45B PE=4 SV=1	0.969052	-0.045354	0.878704
G1TBC0	5061.5	4321.5	4700	5225.4	4487.4	4312.9	Squamous cell carcinoma antigen recognized by T cells 3 OS=Oryctolagus cuniculus OX=9986 GN=SART3 PE=4 SV=1	0.995931	-0.0058823	0.95932
D5FIT0	696.1	594.5	708.1	651.8	630.9	452	Lipoprotein lipase OS=Oryctolagus cuniculus OX=9986 GN=LPL PE=2 SV=1	0.867914	-0.204376	0.294042
G1SCT1	5472.7	4674.2	4714.3	3757.2	4577.8	3167	Prolyl endopeptidase OS=Oryctolagus cuniculus OX=9986 GN=PREP PE=4 SV=2	0.773962	-0.369665	0.08196
G1SL03	446.8	381.7	409.9	375.1	406.9	410	Inosine triphosphate pyrophosphatase OS=Oryctolagus cuniculus OX=9986 GN=ITPA PE=3 SV=1	0.962532	-0.0550936	0.51902
G1SF02	4487.5	3833.7	4248	4405.6	4358.6	4393.7	Cell division cycle 40 OS=Oryctolagus cuniculus OX=9986 GN=CDC40 PE=4 SV=1	1.04684	0.0660368	0.363401
G1TFX4	1397.2	1193.8	1351.1	1071.3	1317.1	963.3	Cytohesin 4 OS=Oryctolagus cuniculus OX=9986 GN=CYTH4 PE=4 SV=1	0.850232	-0.234072	0.180454
G1TPV7	7148.2	6107.7	5865.6	7784.5	8417.2	6060.8	Uncharacterized protein OS=Oryctolagus cuniculus OX=9986 GN=LOC108176887 PE=4 SV=1	1.16427	0.219419	0.264053
G1SML0	1047.7	895.2	955.8	1097.4	1018.2	680.9	Large 60S subunit nuclear export GTPase 1 OS=Oryctolagus cuniculus OX=9986 GN=LSG1 PE=4 SV=2	0.964743	-0.0517834	0.813443
G1SRD1	376.7	321.9	350.6	343.8	348.4	237.2	Exonuclease 3'-5' domain containing 2 OS=Oryctolagus cuniculus OX=9986 GN=EXD2 PE=4 SV=2	0.885818	-0.174918	0.37054
G1T011	4469.2	3820.9	4632.6	4773.9	4624.9	5839.2	Uncharacterized protein OS=Oryctolagus cuniculus OX=9986 GN=SUPT16H PE=4 SV=1	1.17917	0.237766	0.165574
G1SFF5	3793.4	3243.2	3382.9	4145.3	4316.2	4399	Serine palmitoyltransferase long chain base subunit 2 OS=Oryctolagus cuniculus OX=9986 GN=SPTLC2 PE=3 SV=1	1.23427	0.30366	0.010908
G1SV89	766.4	655.3	692.2	695.1	796.5	502	Uncharacterized protein OS=Oryctolagus cuniculus OX=9986 PE=4 SV=2	0.943091	-0.0845311	0.686523
G1SZB9	315.1	269.4	313.2	309.8	297.2	183.6	Proteasome assembly chaperone 4 OS=Oryctolagus cuniculus OX=9986 GN=PSMG4 PE=4 SV=1	0.880695	-0.183286	0.451309
G1TZE2	2106.9	1801.7	2043.3	2042.3	2289.5	1711.1	Glutathione S-transferase zeta 1 OS=Oryctolagus cuniculus OX=9986 GN=GSTZ1 PE=3 SV=1	1.01529	0.0218904	0.88189
G1TB57	714.3	610.9	720.6	771.2	764.6	510	Mitochondrial ribosomal protein S35 OS=Oryctolagus cuniculus OX=9986 GN=MRPS35 PE=4 SV=1	1	0	1
G1U3M0	1356.8	1160.4	1248.8	1206.1	1226.5	1095.6	VPS39, HOPS complex subunit OS=Oryctolagus cuniculus OX=9986 GN=VPS39 PE=4 SV=1	0.936856	-0.0941008	0.319821
G1SZW8	7791.4	6663.9	6869.4	6377.9	6692	5016.6	Epidermal growth factor receptor pathway substrate 15 like 1 OS=Oryctolagus cuniculus OX=9986 GN=EPS15L1 PE=4 SV=1	0.848148	-0.237612	0.156733
G1SS49	1224.2	1047.1	1038.3	916.4	1304.6	481.9	Haloacid dehalogenase like hydrolase domain containing 2 OS=Oryctolagus cuniculus OX=9986 GN=HDHD2 PE=4 SV=1	0.816685	-0.292148	0.455867
G1T3V0	28217.6	24139.3	26230.8	29229.2	25985	16593.2	High density lipoprotein binding protein OS=Oryctolagus cuniculus OX=9986 GN=HDLBP PE=4 SV=1	0.913723	-0.130171	0.599389
G1SIA3	783	669.9	769.1	763.2	800.2	1052.3	Activating signal cointegrator 1 complex subunit 3 OS=Oryctolagus cuniculus OX=9986 GN=ASCC3 PE=4 SV=1	1.17718	0.235339	0.249782
G1SXX3	383.3	328	359.4	325.5	335	299.5	Dynein light chain Tctex-type 3 OS=Oryctolagus cuniculus OX=9986 GN=DYNLT3 PE=4 SV=2	0.89661	-0.157448	0.127129
G1SJW7	2717.9	2325.5	2686.9	2661.7	2426.6	2534.8	Small nuclear ribonucleoprotein-associated protein OS=Oryctolagus cuniculus OX=9986 GN=SNRPN PE=3 SV=1	0.986132	-0.0201473	0.815121
G1TIT4	2968.7	2540.5	3129.7	3387.3	3279.6	2810.5	PTTG1 interacting protein OS=Oryctolagus cuniculus OX=9986 GN=PTTG1IP PE=4 SV=1	1.09706	0.133644	0.32538
G1SL87	1240.6	1061.8	1058.2	1097.1	1237.5	1415.6	Pleckstrin and Sec7 domain containing 4 OS=Oryctolagus cuniculus OX=9986 GN=PSD4 PE=4 SV=2	1.11593	0.158249	0.303481
G1SXB6	3966.8	3395.3	3578.5	3625.8	3434.9	2290	Protein O-glucosyltransferase 1 OS=Oryctolagus cuniculus OX=9986 GN=POGLUT1 PE=4 SV=2	0.854679	-0.226545	0.304059
G1SID3	24690.1	21137.2	23699.7	22077.5	22802.4	16217.1	Vacuolar protein sorting 13 homolog C OS=Oryctolagus cuniculus OX=9986 GN=VPS13C PE=4 SV=2	0.878752	-0.186472	0.295727
U3KM31	11184	9574.7	9331.7	7883.8	9487.3	5502	Carnosine dipeptidase 2 OS=Oryctolagus cuniculus OX=9986 GN=CNDP2 PE=4 SV=1	0.760146	-0.395652	0.136857
G1SDM0	127.9	109.5	134.9	103.8	112.9	95.7	Uncharacterized protein OS=Oryctolagus cuniculus OX=9986 GN=CIAO2B PE=4 SV=1	0.839108	-0.253072	0.092218
G1T0H6	148.7	127.3	147.1	147.6	162.9	272.7	Caspase 7 OS=Oryctolagus cuniculus OX=9986 GN=CASP7 PE=3 SV=2	1.3784	0.462993	0.252989
G1U8C4	17416.3	14913.9	15120.2	13181.1	17038	14251.8	Proteasome activator subunit 1 OS=Oryctolagus cuniculus OX=9986 GN=PSME1 PE=4 SV=1	0.937208	-0.0935588	0.517693
G1T1C5	1678.7	1437.6	1632.5	1347.5	1375.3	633.1	Uncharacterized protein OS=Oryctolagus cuniculus OX=9986 GN=IGBP1 PE=4 SV=1	0.706684	-0.500863	0.141429
G1TXF8	5472.5	4686.6	5312	4107.4	5199.4	3640.2	Adenylosuccinate synthetase isozyme 2 OS=Oryctolagus cuniculus OX=9986 GN=ADSS PE=3 SV=1	0.836851	-0.256957	0.181294
G1TR42	2809.1	2406.2	2547.9	2304.8	2388	1648.5	Arginyl aminopeptidase OS=Oryctolagus cuniculus OX=9986 GN=RNPEP PE=4 SV=1	0.816841	-0.291873	0.144655
G1SS55	252.1	215.9	229.1	180.7	193.4	240.2	Rabenosyn, RAB effector OS=Oryctolagus cuniculus OX=9986 GN=RBSN PE=4 SV=1	0.881222	-0.182423	0.258223
G1SZ59	20938.4	17942.7	18293.4	16939.5	20555.7	23348.1	Eukaryotic initiation factor 4A-I OS=Oryctolagus cuniculus OX=9986 GN=EIF4A1 PE=3 SV=1	1.06417	0.0897259	0.588532
G1TGI6	1670.5	1431.6	1536.5	1539	1506.6	1015	40S ribosomal protein SA OS=Oryctolagus cuniculus OX=9986 GN=RPSA PE=1 SV=1	0.875393	-0.191997	0.352004
G1T8D5	760.7	652	825.2	917.3	1213.7	1022.9	Uncharacterized protein OS=Oryctolagus cuniculus OX=9986 PE=4 SV=1	1.40931	0.494991	0.038339
G1TPN2	7502.6	6430.5	6557.7	7201.9	6159.2	8918.9	Cell division cycle 37 OS=Oryctolagus cuniculus OX=9986 GN=CDC37 PE=1 SV=1	1.08732	0.120773	0.5319
U3KPC4	1330.1	1140	1161.5	1229.1	1157.3	1139.5	Mitochondrial antiviral signaling protein OS=Oryctolagus cuniculus OX=9986 GN=MAVS PE=4 SV=1	0.970894	-0.0426143	0.621995
G1ST17	795.2	681.6	673.1	676.7	1298.2	1010.1	Peptidoglycan-recognition protein OS=Oryctolagus cuniculus OX=9986 GN=PGLYRP1 PE=3 SV=1	1.38844	0.473462	0.204532
G1T6D8	3314.1	2841.2	3151	3280.8	3183.6	2721.5	WD repeat domain 11 OS=Oryctolagus cuniculus OX=9986 GN=WDR11 PE=4 SV=2	0.987063	-0.0187859	0.864946
G1SRD2	7234.7	6203.3	7140.4	8885.7	8722.3	9257.2	Acyl-CoA dehydrogenase long chain OS=Oryctolagus cuniculus OX=9986 GN=ACADL PE=3 SV=1	1.3055	0.384608	0.004573
G1SCJ1	1643.1	1408.9	1527.7	1797.3	1740.6	1058.1	Solute carrier family 43 member 2 OS=Oryctolagus cuniculus OX=9986 GN=SLC43A2 PE=4 SV=2	1.00356	0.00512544	0.9835
G1T3P4	49.5	42.4	43	50.1	51.8	73.4	Bromodomain adjacent to zinc finger domain 1A OS=Oryctolagus cuniculus OX=9986 GN=BAZ1A PE=4 SV=1	1.29948	0.377936	0.160836
B6V9S9	23410.4	20076.3	21627.1	19653.1	22295.4	17301.4	Chaperonin-containing T-complex polypeptide beta subunit OS=Oryctolagus cuniculus OX=9986 GN=CCT2 PE=2 SV=1	0.909944	-0.13615	0.322809
G1TR97	640.6	549.4	574	516.3	540.2	424.8	Eukaryotic translation initiation factor 4 gamma 3 OS=Oryctolagus cuniculus OX=9986 GN=EIF4G3 PE=4 SV=2	0.839739	-0.251987	0.101529
G1TFE8	1254.1	1075.5	1177.2	1073	910.8	610.7	40S ribosomal protein S26 OS=Oryctolagus cuniculus OX=9986 GN=LOC100346996 PE=1 SV=1	0.739848	-0.434699	0.10391
G1SST9	7152.8	6134.4	5787.1	5149.8	5264.3	3666.6	Uncharacterized protein OS=Oryctolagus cuniculus OX=9986 GN=RAD23B PE=4 SV=1	0.738203	-0.43791	0.064632
G1T1J7	612.6	525.5	564.7	495.5	546.9	284	Non-specific serine/threonine protein kinase OS=Oryctolagus cuniculus OX=9986 GN=SGK3 PE=4 SV=2	0.778952	-0.360394	0.210874
G1SLY2	699.4	600.2	638.1	598.3	633.6	454.2	RAB11 family interacting protein 1 OS=Oryctolagus cuniculus OX=9986 GN=RAB11FIP1 PE=4 SV=1	0.870155	-0.200656	0.247672
P53815	114.2	98	102.9	118.2	111.3	77.6	Translocon-associated protein subunit alpha OS=Oryctolagus cuniculus OX=9986 GN=SSR1 PE=2 SV=1	0.974611	-0.0371016	0.852273
G1U2E3	4090.2	3509.8	3365.7	3340.5	3693.8	2980.9	Charged multivesicular body protein 4B OS=Oryctolagus cuniculus OX=9986 GN=CHMP4B PE=3 SV=1	0.913321	-0.130806	0.353748
G1SHY4	1097.1	941.4	996.8	1157.2	1115.8	1381.5	Stromal cell derived factor 2 like 1 OS=Oryctolagus cuniculus OX=9986 GN=SDF2L1 PE=4 SV=1	1.204	0.267835	0.09377
G1TCD4	1893.4	1624.9	1868	1673.3	1795.4	1317.2	Family with sequence similarity 114 member A2 OS=Oryctolagus cuniculus OX=9986 GN=FAM114A2 PE=4 SV=2	0.888532	-0.170504	0.297
G1SES0	956	820.7	951.3	853.8	929.5	840	Rho GTPase activating protein 4 OS=Oryctolagus cuniculus OX=9986 GN=ARHGAP4 PE=4 SV=2	0.96162	-0.0564612	0.541416
G1TL09	357.9	307.2	334.7	317.5	338.8	313.6	Tripartite motif containing 32 OS=Oryctolagus cuniculus OX=9986 GN=TRIM32 PE=4 SV=1	0.970094	-0.0438035	0.580921
G1SEF8	11069.4	9503.2	9536.8	12180.5	11845.6	10695.7	NSF attachment protein alpha OS=Oryctolagus cuniculus OX=9986 GN=NAPA PE=4 SV=1	1.15319	0.205628	0.088131
O77819	16010.7	13749.5	14822.8	14139	16405.1	9987.6	Rho-associated protein kinase 1 OS=Oryctolagus cuniculus OX=9986 GN=ROCK1 PE=1 SV=1	0.909129	-0.137443	0.534476
G1U3G6	2257.8	1939	2224.8	2367.9	2263	1929.4	Peptidyl-tRNA hydrolase 2 OS=Oryctolagus cuniculus OX=9986 GN=PTRH2 PE=4 SV=1	1.0216	0.030829	0.795017
G1T3M3	2278.3	1956.6	2136	2236.6	2216.9	3143.2	RAB21, member RAS oncogene family OS=Oryctolagus cuniculus OX=9986 GN=RAB21 PE=4 SV=2	1.19241	0.253876	0.269966
G1TAQ0	534.4	459	561	600.4	540	1309.4	LMBR1 domain containing 1 OS=Oryctolagus cuniculus OX=9986 GN=LMBRD1 PE=4 SV=2	1.57604	0.656306	0.296646
G1SXR7	768.5	660.2	765.9	799.8	808.7	439.6	Uncharacterized protein OS=Oryctolagus cuniculus OX=9986 GN=SLIRP PE=4 SV=2	0.933245	-0.0996722	0.719549
G1SMK8	2104.4	1807.7	1896.3	1795.9	1838.7	1456.9	BCL2 associated athanogene 2 OS=Oryctolagus cuniculus OX=9986 GN=BAG2 PE=4 SV=1	0.876575	-0.190051	0.184932
G1TF72	1605.6	1379.4	1347.1	1601	1837.2	1834.7	Coiled-coil-helix-coiled-coil-helix domain containing 4 OS=Oryctolagus cuniculus OX=9986 GN=CHCHD4 PE=4 SV=2	1.21717	0.283531	0.04994
G1SNZ3	17038.1	14639.5	15394.8	14349.5	15397.5	10177.4	Chromosome segregation 1 like OS=Oryctolagus cuniculus OX=9986 GN=CSE1L PE=4 SV=1	0.848149	-0.23761	0.243751
G1SIT6	985	846.6	1234.8	1056.6	1233.1	833.9	Actin-related protein 2/3 complex subunit 5 OS=Oryctolagus cuniculus OX=9986 GN=ARPC5L PE=3 SV=1	1.01865	0.0266641	0.911979
G1TCU9	890.9	765.9	801.8	909.1	812.1	780	Bet1 golgi vesicular membrane trafficking protein OS=Oryctolagus cuniculus OX=9986 GN=BET1 PE=4 SV=1	1.01733	0.0247835	0.804609
G1T920	1652.3	1420.5	1432.7	1301.9	1351.7	970	Selenophosphate synthetase 1 OS=Oryctolagus cuniculus OX=9986 GN=SEPHS1 PE=4 SV=1	0.804261	-0.314264	0.106336
G1TCZ7	297.6	255.9	315.6	305	265.8	235.2	Zinc finger MYM-type containing 2 OS=Oryctolagus cuniculus OX=9986 GN=ZMYM2 PE=4 SV=2	0.927396	-0.108743	0.477125
G1TQ57	1717.6	1477	1811.9	1782.9	1737.8	1417.1	E3 ubiquitin protein ligase OS=Oryctolagus cuniculus OX=9986 GN=RNF40 PE=3 SV=1	0.986278	-0.0199337	0.887773
G1STQ0	618.8	532.1	506.4	602.6	586.5	291.4	SIL1 nucleotide exchange factor OS=Oryctolagus cuniculus OX=9986 GN=SIL1 PE=4 SV=2	0.89332	-0.162751	0.610193
G1U6S9	29429.6	25307.8	24333.3	29514.9	29064	29558	Myosin IF OS=Oryctolagus cuniculus OX=9986 GN=MYO1F PE=3 SV=1	1.11466	0.156602	0.126533
G1SX40	526.4	452.7	475.4	467.4	449.6	588.6	Protein SDA1 OS=Oryctolagus cuniculus OX=9986 GN=SDAD1 PE=3 SV=1	1.03513	0.0498148	0.744682
G1T6G7	3222.8	2771.7	2809.6	3052.6	2958.8	3244.2	Centrosomal protein 250 OS=Oryctolagus cuniculus OX=9986 GN=CEP250 PE=4 SV=2	1.05128	0.0721511	0.418703
U3KNK3	282.9	243.3	220	245.3	247.3	176	Ubiquitin conjugating enzyme E2 D2 OS=Oryctolagus cuniculus OX=9986 GN=UBE2D2 PE=3 SV=1	0.896006	-0.15842	0.434005
G1SSN0	1647.6	1417.3	1566.1	1763.8	1633.5	1325.7	ATP binding cassette subfamily B member 10 OS=Oryctolagus cuniculus OX=9986 GN=ABCB10 PE=4 SV=1	1.01987	0.0283796	0.844252
G1TB62	352.2	303	330.3	316.1	319.5	389.5	SAP30 binding protein OS=Oryctolagus cuniculus OX=9986 GN=SAP30BP PE=4 SV=1	1.04018	0.0568374	0.660052
G1SUQ0	3465	2980.9	3639.9	4148.9	4058.4	4722.9	O-acyltransferase OS=Oryctolagus cuniculus OX=9986 GN=SOAT1 PE=3 SV=2	1.28202	0.358419	0.029702
G1SUF9	3889.6	3347.1	3306.2	3839.2	3788.6	4475.3	Alpha-mannosidase OS=Oryctolagus cuniculus OX=9986 PE=3 SV=1	1.14799	0.199105	0.147507
G1T578	2604.5	2241.4	2181	2795.9	2409.6	1885.9	Acid phosphatase 2, lysosomal OS=Oryctolagus cuniculus OX=9986 GN=ACP2 PE=3 SV=1	1.00918	0.0131821	0.945399
G1TIS5	39820.5	34269.6	55247.5	39924.9	53348.6	59308.2	Annexin OS=Oryctolagus cuniculus OX=9986 GN=ANXA1 PE=3 SV=1	1.17972	0.23844	0.413547
G1SPH7	1778.3	1530.8	1458.1	1525.8	1521.4	1738.2	Cleavage and polyadenylation specificity factor subunit 2 OS=Oryctolagus cuniculus OX=9986 GN=CPSF2 PE=3 SV=1	1.00382	0.00549772	0.962249
G1TCH6	859.3	739.8	749.5	714.7	670.7	1161.5	RALBP1 associated Eps domain containing 1 OS=Oryctolagus cuniculus OX=9986 GN=REPS1 PE=4 SV=2	1.08443	0.116941	0.703119
G1SZL5	71.5	61.6	69.4	59.3	67.9	184.3	E74 like ETS transcription factor 1 OS=Oryctolagus cuniculus OX=9986 GN=ELF1 PE=3 SV=2	1.53827	0.621311	0.419552
G1SS45	277.8	239.2	223.1	252.6	281.6	126.9	Adhesion G protein-coupled receptor E2 OS=Oryctolagus cuniculus OX=9986 GN=ADGRE2 PE=3 SV=1	0.893258	-0.162851	0.627442
G1U8N0	456.8	393.3	472.9	469.9	488.2	426.1	General transcription factor IIH subunit 4 OS=Oryctolagus cuniculus OX=9986 GN=VARS2 PE=3 SV=1	1.04626	0.06524	0.540129
G1TWP4	12218.2	10521.8	11222.6	10012.7	10341	7520.8	Valyl-tRNA synthetase OS=Oryctolagus cuniculus OX=9986 GN=VARS PE=3 SV=1	0.820741	-0.285001	0.116821
G1T765	16552.1	14254.4	15638.5	17744	18982.8	32516.8	Malate dehydrogenase OS=Oryctolagus cuniculus OX=9986 GN=MDH2 PE=3 SV=1	1.49087	0.576157	0.186942
G1SCT5	6643.8	5722.3	5988.4	5468.1	6415.9	4700.1	Coronin OS=Oryctolagus cuniculus OX=9986 PE=3 SV=2	0.903544	-0.146333	0.356549
G1SWE2	276	237.7	255.7	333.1	295.2	239.9	Aph-1 homolog A, gamma-secretase subunit OS=Oryctolagus cuniculus OX=9986 GN=APH1A PE=4 SV=1	1.12841	0.174294	0.322952
G1TQP6	233.1	200.8	214.5	154.9	201.2	160.9	Uncharacterized protein OS=Oryctolagus cuniculus OX=9986 PE=3 SV=1	0.797347	-0.32672	0.064437
G1SL57	15422	13286	13671.8	12834	13640.3	10725.6	Septin 7 OS=Oryctolagus cuniculus OX=9986 GN=SEPT7 PE=3 SV=2	0.877774	-0.188079	0.188185
G1TEG2	5559.8	4789.8	4994.1	5679	7044.5	13857.9	ADP-ribosyl cyclase/cyclic ADP-ribose hydrolase 1 OS=Oryctolagus cuniculus OX=9986 GN=CD38 PE=4 SV=1	1.7324	0.79277	0.214308
G1SG37	1084.1	934	982.8	1128.3	1029.1	921.7	Golgi SNAP receptor complex member 1 OS=Oryctolagus cuniculus OX=9986 GN=GOSR1 PE=3 SV=1	1.02606	0.0371137	0.743246
G1TJ59	451.6	389.1	488.1	404.8	482.9	337.7	Ankyrin repeat domain 44 OS=Oryctolagus cuniculus OX=9986 GN=ANKRD44 PE=4 SV=2	0.922185	-0.116872	0.535828
G1U8A9	321.5	277	355.9	336.6	321.8	250.9	Uncharacterized protein OS=Oryctolagus cuniculus OX=9986 GN=VPS72 PE=4 SV=1	0.952745	-0.069838	0.689204
G1T671	3007.5	2591.7	2960.8	2688.4	3065.5	2665.9	Uncharacterized protein OS=Oryctolagus cuniculus OX=9986 GN=ACAT2 PE=4 SV=2	0.983621	-0.0238256	0.812669
G1TCZ5	391.7	337.5	406.6	407.2	404.1	281.4	Sorting nexin 17 OS=Oryctolagus cuniculus OX=9986 GN=SNX17 PE=4 SV=1	0.962053	-0.0558117	0.772507
G1T332	1428.4	1231.1	1271.8	1146.4	1305.9	680.4	Aspartate aminotransferase OS=Oryctolagus cuniculus OX=9986 GN=GOT1 PE=4 SV=1	0.796861	-0.3276	0.24809
G1SFQ7	336.2	289.8	307.6	290.4	322.5	489.3	Tubulin gamma chain OS=Oryctolagus cuniculus OX=9986 GN=TUBG1 PE=3 SV=1	1.18059	0.239509	0.423544
G1TG85	1952.4	1682.9	2478.6	2031.3	1047.5	790	Ankyrin 1 OS=Oryctolagus cuniculus OX=9986 GN=ANK1 PE=4 SV=2	0.632788	-0.660206	0.167599
G1SHJ3	152	131.1	143.4	156.5	133.6	133.7	KDEL motif containing 1 OS=Oryctolagus cuniculus OX=9986 GN=KDELC1 PE=4 SV=2	0.993669	-0.00916274	0.930795
G1SYS3	1315.2	1133.7	1250	1325.1	1272.3	1596.4	Trafficking protein particle complex 11 OS=Oryctolagus cuniculus OX=9986 GN=TRAPPC11 PE=4 SV=2	1.1338	0.181162	0.219985
G1TA86	769.6	663.4	762.8	888.1	873.3	989.7	Lipid droplet associated hydrolase OS=Oryctolagus cuniculus OX=9986 GN=LDAH PE=4 SV=2	1.25289	0.325262	0.021021
G1SEC3	542.8	467.9	484.9	355.4	462.2	239	Cytosolic Fe-S cluster assembly factor NUBP1 OS=Oryctolagus cuniculus OX=9986 GN=NUBP1 PE=3 SV=1	0.706472	-0.501296	0.098889
G1SYG6	2959.8	2551.6	2808.7	3094.7	2853	2130.7	Amyloid beta precursor like protein 2 OS=Oryctolagus cuniculus OX=9986 GN=APLP2 PE=4 SV=1	0.97095	-0.0425311	0.809649
G1TDK0	14556.3	12549.6	10978.1	11766.5	15841.8	19294.3	Myosin light chain 6 OS=Oryctolagus cuniculus OX=9986 GN=MYL6 PE=4 SV=1	1.23156	0.300483	0.289468
G1U7L3	876.2	755.5	825.8	818.3	875.1	856.9	Uncharacterized protein OS=Oryctolagus cuniculus OX=9986 PE=4 SV=2	1.03776	0.0534756	0.469954
G1SF35	3518.5	3033.8	3326.1	3852.4	3631.7	2450.2	Vesicle associated membrane protein 7 OS=Oryctolagus cuniculus OX=9986 GN=VAMP7 PE=3 SV=1	1.00566	0.0081412	0.969467
G1SIP1	1873.4	1615.3	2038.2	2072.2	1904.2	1211.4	Dehydrogenase/reductase 1 OS=Oryctolagus cuniculus OX=9986 GN=DHRS1 PE=4 SV=1	0.938646	-0.0913469	0.71727
G1SSS4	231.7	199.8	212.7	197.1	193.9	211.7	Chloride transport protein 6 OS=Oryctolagus cuniculus OX=9986 GN=CLCN6 PE=3 SV=1	0.935579	-0.0960686	0.268078
G1SLJ8	389.9	336.2	366.3	336.2	402.2	410.2	pre-rRNA processing protein FTSJ3 OS=Oryctolagus cuniculus OX=9986 GN=FTSJ3 PE=3 SV=1	1.05145	0.0723748	0.54187
G1TQT8	644.9	556.1	695.5	588.3	6101.6	615.2	Villin 1 OS=Oryctolagus cuniculus OX=9986 GN=VIL1 PE=4 SV=1	3.85188	1.94556	0.381193
G1SWY0	8249.1	7114.5	7728.1	8563	8387.1	7882.9	RAB6A, member RAS oncogene family OS=Oryctolagus cuniculus OX=9986 GN=RAB6A PE=4 SV=1	1.07541	0.104884	0.20716
G1TAZ9	6748.1	5821.3	5448.8	6762.9	6399.9	5161.7	Thromboxane A synthase 1 OS=Oryctolagus cuniculus OX=9986 GN=TBXAS1 PE=3 SV=2	1.017	0.0243183	0.877145
G1TCS5	161.8	139.5	142.1	172.7	176.3	189.2	Thioredoxin domain containing 11 OS=Oryctolagus cuniculus OX=9986 GN=TXNDC11 PE=4 SV=1	1.2138	0.279533	0.021631
G1SMA7	1556	1342.5	1391.5	1258.3	1258.8	650.5	NudC domain containing 1 OS=Oryctolagus cuniculus OX=9986 GN=NUDCD1 PE=4 SV=1	0.738368	-0.437588	0.15343
G1T8M3	1008.3	870	842.8	861.8	858.2	735	X-ray repair cross complementing 4 OS=Oryctolagus cuniculus OX=9986 GN=XRCC4 PE=4 SV=2	0.902209	-0.148466	0.250435
G1STJ8	13191.5	11383	13529.2	13323.1	11649.5	9648.5	Myosin VA OS=Oryctolagus cuniculus OX=9986 GN=MYO5A PE=3 SV=2	0.908602	-0.13828	0.40693
G1SJC1	52041.2	44911.9	56872	54771.5	43076.8	70671.1	Mannose receptor C-type 1 OS=Oryctolagus cuniculus OX=9986 GN=MRC1 PE=4 SV=2	1.09553	0.131624	0.604235
G1SYJ4	41811.7	36094.4	35794.3	26442.7	32161.4	37485.3	Enolase 1 OS=Oryctolagus cuniculus OX=9986 GN=ENO1 PE=3 SV=1	0.84511	-0.242789	0.191729
G1SW09	2461.5	2125	2349.1	2264.3	2073.3	1838.8	RNA binding motif protein 26 OS=Oryctolagus cuniculus OX=9986 GN=RBM26 PE=4 SV=2	0.890536	-0.167254	0.184194
P25227	1510.5	1304.2	1906.2	1164.9	966	565.8	Alpha-1-acid glycoprotein OS=Oryctolagus cuniculus OX=9986 GN=ORM1 PE=2 SV=1	0.571226	-0.807866	0.05383
G1SUT0	3601.1	3109.5	3247.4	3445.1	3321.4	2492.8	Transportin 2 OS=Oryctolagus cuniculus OX=9986 GN=TNPO2 PE=4 SV=1	0.929835	-0.104953	0.522694
G1SSG2	5777.1	4989.7	5394.2	4557.5	5388.5	2718.8	Vacuolar protein sorting 4 homolog B OS=Oryctolagus cuniculus OX=9986 GN=VPS4B PE=3 SV=2	0.783664	-0.351693	0.228708
G1SSK8	15076.8	13022.2	13923.4	16408.6	17058.4	24434.7	Citrate synthase OS=Oryctolagus cuniculus OX=9986 GN=CS PE=3 SV=1	1.37788	0.462447	0.115631
G1SN20	3582.4	3094.8	3418.8	3932.5	3570.7	3285.9	Phosphatidylinositol-4,5-bisphosphate 4-phosphatase OS=Oryctolagus cuniculus OX=9986 GN=PIP4P1 PE=4 SV=1	1.06865	0.0957908	0.382403
G1SLF6	1983.4	1713.6	2061.2	1989.1	1973.4	1813.3	DNA helicase OS=Oryctolagus cuniculus OX=9986 GN=MCM3 PE=3 SV=2	1.00306	0.00440359	0.963156
G1SED7	2098	1812.7	1818.8	1971.4	1776.1	2161.3	Exosome component 7 OS=Oryctolagus cuniculus OX=9986 GN=EXOSC7 PE=4 SV=1	1.03129	0.0444557	0.702624
G1SGW0	1367.4	1181.6	1451.4	1723.9	1491.3	916.1	Epithelial membrane protein 3 OS=Oryctolagus cuniculus OX=9986 GN=EMP3 PE=3 SV=1	1.03272	0.0464519	0.871431
G1SDD3	721.8	623.8	692.1	774.2	658.1	589.2	Potassium channel tetramerization domain containing 10 OS=Oryctolagus cuniculus OX=9986 GN=KCTD10 PE=4 SV=2	0.99205	-0.0115153	0.934021
G1U9T1	22607.9	19539.1	20384.5	18721	20690.6	16850.4	T-complex protein 1 subunit eta OS=Oryctolagus cuniculus OX=9986 GN=CCT7 PE=3 SV=2	0.899739	-0.152422	0.219705
G1T5S6	1068.5	923.5	1346.7	1213.3	1012.6	689.7	Zinc finger protein 512 OS=Oryctolagus cuniculus OX=9986 GN=ZNF512 PE=4 SV=1	0.873274	-0.195494	0.512953
G1SVH1	3264.4	2822.2	3289.2	3605.1	3434	3313.8	Mitochondrial calcium uptake 1 OS=Oryctolagus cuniculus OX=9986 GN=MICU1 PE=4 SV=2	1.10421	0.143021	0.133971
G1TD22	230.5	199.3	209.8	210.5	237.4	437.7	Kinesin family member 4A OS=Oryctolagus cuniculus OX=9986 GN=KIF4A PE=3 SV=2	1.38461	0.469485	0.319827
G1TI56	470.5	406.8	432.3	425.2	464.6	393.7	Uncharacterized protein OS=Oryctolagus cuniculus OX=9986 PE=4 SV=1	0.98007	-0.0290433	0.768574
G1SY30	20489.3	17715	20503.8	22082.9	20487.5	18444.6	Small nuclear ribonucleoprotein U5 subunit 200 OS=Oryctolagus cuniculus OX=9986 GN=SNRNP200 PE=4 SV=1	1.03929	0.0556038	0.612778
G1T4H0	12634.4	10923.8	10600.7	11728.7	12930.9	12689.9	Uncharacterized protein OS=Oryctolagus cuniculus OX=9986 GN=TMOD3 PE=4 SV=1	1.0934	0.128828	0.218902
G1TMS5	25810.2	22316	23172.8	20935.3	23587.8	20266.8	T-complex protein 1 subunit epsilon OS=Oryctolagus cuniculus OX=9986 GN=CCT5 PE=3 SV=1	0.908707	-0.138113	0.21165
G1T8Z8	931.4	805.3	842.6	1000.5	945.8	1109.9	Reticulophagy regulator family member 3 OS=Oryctolagus cuniculus OX=9986 GN=RETREG3 PE=4 SV=1	1.1849	0.244759	0.059779
G1T1H9	53162.5	45969.1	47259.7	52697.8	52808.3	70616.5	Integrin beta OS=Oryctolagus cuniculus OX=9986 GN=ITGB2 PE=3 SV=1	1.2031	0.266751	0.19378
G1T677	379.9	328.6	362.5	357	384.3	407.8	Kinesin associated protein 3 OS=Oryctolagus cuniculus OX=9986 GN=KIFAP3 PE=4 SV=1	1.07292	0.101547	0.283471
G1T3L4	1678.9	1452.1	1477.2	1505.4	1603.3	1573.6	Solute carrier family 43 member 3 OS=Oryctolagus cuniculus OX=9986 GN=SLC43A3 PE=4 SV=2	1.01608	0.023014	0.765641
G1T2M9	4000	3460	4374.5	4930.1	3423.7	2295.7	SPARC OS=Oryctolagus cuniculus OX=9986 GN=SPARC PE=4 SV=1	0.899869	-0.152213	0.650509
G1T329	5136.7	4444	4701.1	4845.6	4500.2	3562.2	CDK5 regulatory subunit associated protein 3 OS=Oryctolagus cuniculus OX=9986 GN=CDK5RAP3 PE=4 SV=2	0.903808	-0.145912	0.350338
G1U248	6937.6	6002.1	7074.4	7418.5	6557.6	7869.1	Uncharacterized protein OS=Oryctolagus cuniculus OX=9986 GN=HNRNPH1 PE=4 SV=2	1.09149	0.126299	0.298629
G1T835	454	392.8	476.4	461.2	441.4	428.5	Ubiquitinyl hydrolase 1 OS=Oryctolagus cuniculus OX=9986 GN=USP3 PE=3 SV=1	1.00597	0.00858728	0.926271
G1T2C7	243.1	210.4	239.2	208.6	236.3	245.5	Decapping mRNA 1A OS=Oryctolagus cuniculus OX=9986 GN=DCP1A PE=4 SV=1	0.99668	-0.00479772	0.962048
G1SKC9	4194.1	3629.7	3255.5	3465.6	4006.8	2107.5	Uncharacterized protein OS=Oryctolagus cuniculus OX=9986 GN=LOC100347754 PE=4 SV=2	0.864667	-0.209783	0.470245
G1U971	11145.9	9646.2	10097.5	10300.3	10160.9	10006.5	Eukaryotic translation initiation factor 3 subunit C OS=Oryctolagus cuniculus OX=9986 GN=EIF3C PE=1 SV=1	0.986342	-0.0198401	0.771358
G1U0J7	2512.6	2174.5	2553.5	2241.9	2582.8	1347.4	Uncharacterized protein OS=Oryctolagus cuniculus OX=9986 PE=3 SV=1	0.852429	-0.230348	0.409984
G1SHS9	2139	1851.2	1690.6	2691.2	2805.3	1458.8	BCL2 antagonist/killer 1 OS=Oryctolagus cuniculus OX=9986 GN=BAK1 PE=4 SV=1	1.22435	0.292018	0.399149
G1SJU2	2351.8	2035.4	2192.7	2277.9	2306.5	2203.7	RNA helicase aquarius OS=Oryctolagus cuniculus OX=9986 GN=AQR PE=3 SV=2	1.03164	0.0449424	0.511139
G1T3Y8	23745.3	20553.4	23958	24552.5	23845.8	40978.6	Heat shock protein family D (Hsp60) member 1 OS=Oryctolagus cuniculus OX=9986 GN=HSPD1 PE=3 SV=2	1.30942	0.388931	0.284683
G1T5H8	2273.9	1968.3	2075.5	1900.7	1877.3	1972.2	Eukaryotic translation initiation factor 4B OS=Oryctolagus cuniculus OX=9986 GN=EIF4B PE=4 SV=2	0.910173	-0.135787	0.114371
U3KML8	134.3	116.3	145.4	146.4	132.5	118	Transmembrane protein 154 OS=Oryctolagus cuniculus OX=9986 GN=TMEM154 PE=4 SV=1	1.00227	0.00327552	0.980926
G1T369	2318.5	2007.3	1951.8	1764.8	2118.2	851	DCN1-like protein OS=Oryctolagus cuniculus OX=9986 GN=DCUN1D1 PE=4 SV=1	0.75411	-0.407153	0.26204
G1SI36	5194.5	4498.3	5017.1	4738.1	4478.5	3176.9	Karyopherin subunit alpha 1 OS=Oryctolagus cuniculus OX=9986 GN=KPNA1 PE=4 SV=2	0.842528	-0.247203	0.216186
G1T2K0	2972.5	2574.3	2912.2	3092.7	2925.9	1707.4	Glycerol-3-phosphate acyltransferase 3 OS=Oryctolagus cuniculus OX=9986 GN=GPAT3 PE=4 SV=2	0.913347	-0.130765	0.618907
G1SLD6	5983.2	5182	5499.2	4544	5801.2	3607.2	Histidyl-tRNA synthetase OS=Oryctolagus cuniculus OX=9986 GN=HARS PE=3 SV=1	0.837258	-0.256256	0.252667
G1T9P4	253.7	219.7	255	270.4	286.3	315.7	Uncharacterized protein OS=Oryctolagus cuniculus OX=9986 GN=SELENOI PE=3 SV=2	1.19769	0.260259	0.052556
G1T361	13662.7	11833.5	13214.2	15942.4	14778.2	14233.1	Succinate--CoA ligase [GDP-forming] subunit beta, mitochondrial OS=Oryctolagus cuniculus OX=9986 GN=SUCLG2 PE=3 SV=1	1.16128	0.215718	0.049401
U3KM51	9040.7	7830.7	8331.9	10538.9	10493.1	8955.7	Uncharacterized protein OS=Oryctolagus cuniculus OX=9986 PE=3 SV=1	1.18983	0.250758	0.063906
G1STW0	8989.6	7786.9	9591	9046.8	7270.2	7369.4	Uncharacterized protein OS=Oryctolagus cuniculus OX=9986 PE=1 SV=1	0.898318	-0.154702	0.317539
G1SSL4	322.3	279.2	309.5	224.4	274.3	280.3	Interferon-induced double-stranded RNA-activated protein kinase OS=Oryctolagus cuniculus OX=9986 GN=EIF2AK2 PE=2 SV=1	0.855104	-0.225828	0.114262
G1T2M0	3863.4	3346.8	3704.2	3664.5	3800.8	2914.3	KRAS proto-oncogene, GTPase OS=Oryctolagus cuniculus OX=9986 GN=KRAS PE=4 SV=1	0.951001	-0.0724812	0.601797
G1T748	20301.5	17586.9	17665.3	18018.1	21195.3	13774.5	Tripeptidyl peptidase 2 OS=Oryctolagus cuniculus OX=9986 GN=TPP2 PE=4 SV=2	0.953814	-0.0682201	0.731872
G1U3R6	750.4	650.1	740	654.6	717.7	590	RAP1 GTPase activating protein 2 OS=Oryctolagus cuniculus OX=9986 GN=RAP1GAP2 PE=4 SV=2	0.916748	-0.125403	0.289678
G1SJG7	1736.6	1504.6	1578.8	1690.5	1746.7	1044.1	REST corepressor 1 OS=Oryctolagus cuniculus OX=9986 GN=RCOR1 PE=4 SV=2	0.92973	-0.105116	0.656775
G1SRG3	3322.8	2879	3027.5	2911.9	3069.5	3398.1	DIS3 homolog, exosome endoribonuclease and 3'-5' exoribonuclease OS=Oryctolagus cuniculus OX=9986 GN=DIS3 PE=3 SV=1	1.01627	0.0232894	0.808804
G1SHM1	5659.8	4904	5202.8	5056.6	5169.2	4666.1	Uncharacterized protein OS=Oryctolagus cuniculus OX=9986 GN=CBX3 PE=4 SV=1	0.944522	-0.0823437	0.336929
G1SV95	1595.2	1382.3	1768.4	1752.1	2001.5	1384.2	Transforming growth factor beta OS=Oryctolagus cuniculus OX=9986 PE=3 SV=1	1.08258	0.11447	0.569735
G1SJK9	3326.2	2882.1	3349.7	3496.3	3391.9	2438.8	Nucleoporin 54 OS=Oryctolagus cuniculus OX=9986 GN=NUP54 PE=4 SV=1	0.975832	-0.0352953	0.844997
G1SHD5	57.1	49.5	59.4	47.6	55.8	62.4	Mediator of RNA polymerase II transcription subunit 7 OS=Oryctolagus cuniculus OX=9986 GN=MED7 PE=3 SV=1	0.998795	-0.0017395	0.990426
G1T3W4	814	705.6	723.4	844.4	954.1	884.6	Toll like receptor 8 OS=Oryctolagus cuniculus OX=9986 GN=TLR8 PE=3 SV=1	1.19621	0.258471	0.034134
G1TZV3	2974.2	2578.4	2937	2908.8	3033.1	2003.6	Adaptor related protein complex 1 subunit mu 1 OS=Oryctolagus cuniculus OX=9986 GN=AP1M1 PE=3 SV=1	0.93591	-0.0955583	0.629884
G1SSK9	18619.5	16146.2	12955.8	14372.8	15977.5	21468.4	Uncharacterized protein OS=Oryctolagus cuniculus OX=9986 GN=LOC100349893 PE=3 SV=1	1.08586	0.118833	0.63986
G1TB09	198.3	171.9	165.3	169.3	139.3	183.6	Potassium channel tetramerization domain containing 20 OS=Oryctolagus cuniculus OX=9986 GN=KCTD20 PE=4 SV=1	0.919141	-0.121642	0.430918
G1T7D7	1604.9	1391.8	1593.4	1864.5	1731.7	1918	Homeostatic iron regulator OS=Oryctolagus cuniculus OX=9986 GN=HFE PE=3 SV=2	1.20132	0.264627	0.025455
G1SQ54	3011.1	2611.4	2789.8	3274.3	3282.3	2560.7	Heme oxygenase OS=Oryctolagus cuniculus OX=9986 GN=HMOX2 PE=3 SV=1	1.08381	0.116107	0.426381
G1T774	326.2	283	328.7	244.1	247.7	215.3	NHS like 2 OS=Oryctolagus cuniculus OX=9986 GN=NHSL2 PE=4 SV=2	0.753918	-0.40752	0.012988
G1T2G4	8930.9	7747.1	8146	8464.7	8897.9	6966.6	Eukaryotic translation initiation factor 2 subunit 1 OS=Oryctolagus cuniculus OX=9986 GN=EIF2S1 PE=1 SV=1	0.980068	-0.0290462	0.820444
G1T4P8	4074.7	3534.9	3303.2	2820.6	3576.9	2556.5	Glutaredoxin 3 OS=Oryctolagus cuniculus OX=9986 GN=GLRX3 PE=4 SV=2	0.820504	-0.285418	0.162373
G1T5N5	4952.4	4296.4	4691.1	5022	5256.9	4175.8	Elongation factor G, mitochondrial OS=Oryctolagus cuniculus OX=9986 GN=GFM1 PE=3 SV=1	1.03693	0.0523185	0.674698
G1T5L6	12519	10861.4	12106.2	11528.5	11981.2	9580.6	Phosphodiesterase OS=Oryctolagus cuniculus OX=9986 GN=NCKAP1L PE=3 SV=2	0.932473	-0.100866	0.419774
G1TCH9	2654.4	2303.2	2480.9	2822	2675.3	2518.3	ATP binding cassette subfamily B member 7 OS=Oryctolagus cuniculus OX=9986 GN=ABCB7 PE=4 SV=1	1.07758	0.107799	0.224587
G1U687	1734.4	1505	1699.2	1669.2	1629.3	898.9	Uncharacterized protein OS=Oryctolagus cuniculus OX=9986 GN=WASHC1 PE=4 SV=1	0.849917	-0.234606	0.396357
G1SPJ1	289.7	251.5	277.6	296.8	286.3	256.3	Nitric oxide synthase trafficking OS=Oryctolagus cuniculus OX=9986 GN=NOSTRIN PE=4 SV=2	1.02516	0.0358477	0.699702
G1T2R2	17265.8	14984.8	15587.2	17923.4	16053	23140.4	Inositol 1,4,5-trisphosphate receptor type 1 OS=Oryctolagus cuniculus OX=9986 GN=ITPR1 PE=4 SV=2	1.19397	0.255764	0.237331
G1T2A1	241.2	209.4	297.6	252.5	322.7	308.6	Hydrogen voltage gated channel 1 OS=Oryctolagus cuniculus OX=9986 GN=HVCN1 PE=4 SV=2	1.18124	0.240296	0.249011
P62493	10002.6	8684.7	9650.9	11165.7	10957.8	16875.6	Ras-related protein Rab-11A OS=Oryctolagus cuniculus OX=9986 GN=RAB11A PE=2 SV=3	1.3762	0.460692	0.1469
G1T8W7	17549.3	15238.2	15828	18492.9	18192	21757.3	V-type proton ATPase subunit a OS=Oryctolagus cuniculus OX=9986 GN=ATP6V0A1 PE=3 SV=2	1.20213	0.265594	0.070259
P81436	2234.1	1940.1	2143.3	2033.7	2082.6	2416.9	UDP-N-acetylglucosamine--peptide N-acetylglucosaminyltransferase 110 kDa subunit OS=Oryctolagus cuniculus OX=9986 GN=OGT PE=1 SV=2	1.03414	0.0484357	0.653585
G1T419	8108	7041.6	7930.9	8370.3	7431.5	6673.5	Nucleoporin 205 OS=Oryctolagus cuniculus OX=9986 GN=NUP205 PE=4 SV=1	0.973779	-0.0383337	0.750163
G1TE60	717	622.7	672.2	552	646.5	545.9	CAP-Gly domain containing linker protein 2 OS=Oryctolagus cuniculus OX=9986 GN=CLIP2 PE=4 SV=2	0.867041	-0.205828	0.103599
U3KNL5	6777.4	5886.7	6193.6	6383.3	6981.6	3608.7	Eukaryotic translation initiation factor 3 subunit F OS=Oryctolagus cuniculus OX=9986 GN=EIF3F PE=1 SV=1	0.900089	-0.15186	0.589228
G1SGK1	1591.6	1382.7	1554.6	1321.8	1340.3	1134.8	GRB10 interacting GYF protein 2 OS=Oryctolagus cuniculus OX=9986 GN=GIGYF2 PE=4 SV=2	0.838371	-0.254339	0.056722
G1T1P3	6962.9	6048.7	6289.9	7057	8039.4	7322	Acyl-CoA dehydrogenase family member 9 OS=Oryctolagus cuniculus OX=9986 GN=ACAD9 PE=3 SV=1	1.16149	0.215971	0.060694
G1SD95	2167.1	1882.7	2216.8	2349.2	2872.4	2531.4	Uncharacterized protein OS=Oryctolagus cuniculus OX=9986 PE=4 SV=1	1.23719	0.307072	0.0556
G1SPS9	7483.1	6501.9	6839.8	5350.8	6071	4563.7	Amyloid beta precursor protein binding family B member 1 interacting protein OS=Oryctolagus cuniculus OX=9986 GN=APBB1IP PE=4 SV=2	0.767618	-0.38154	0.036524
G1SMH9	674.4	586.1	620.8	615.9	657.3	461.2	NHL repeat containing 3 OS=Oryctolagus cuniculus OX=9986 GN=NHLRC3 PE=4 SV=2	0.921916	-0.117293	0.492963
G1T365	2869.2	2493.6	2789.7	3011.8	2753.6	2242.3	Vacuolar protein sorting-associated protein 16 homolog OS=Oryctolagus cuniculus OX=9986 GN=VPS16 PE=3 SV=2	0.982239	-0.025854	0.858182
G1SE74	4582.3	3983.2	4566.6	4932.9	4472	4206.7	Transcription elongation factor spt6 OS=Oryctolagus cuniculus OX=9986 GN=SUPT6H PE=3 SV=1	1.03651	0.0517396	0.610402
G1TCP7	278.2	241.9	266.9	245	290.7	81.1	RBR-type E3 ubiquitin transferase OS=Oryctolagus cuniculus OX=9986 GN=RNF14 PE=3 SV=1	0.783736	-0.35156	0.42895
G1SMB8	1843.9	1603.1	1681.2	1482.8	1772.1	925.6	Prune exopolyphosphatase 1 OS=Oryctolagus cuniculus OX=9986 GN=PRUNE1 PE=4 SV=1	0.815198	-0.294778	0.288516
G1U522	7051.5	6130.6	6592.3	6438.3	6199.7	3783.1	Protein kinase cAMP-dependent type II regulatory subunit alpha OS=Oryctolagus cuniculus OX=9986 GN=PRKAR2A PE=4 SV=2	0.830422	-0.268083	0.276942
G1SCE1	3848.5	3346	4172.9	3918.9	4692.3	3334.6	GLI pathogenesis related 2 OS=Oryctolagus cuniculus OX=9986 GN=GLIPR2 PE=3 SV=1	1.05088	0.0716007	0.697227
G1TBL0	5626.7	4892.2	4675.6	4445.3	4891.8	3938.4	Basic leucine zipper and W2 domains 2 OS=Oryctolagus cuniculus OX=9986 GN=BZW2 PE=4 SV=2	0.873704	-0.194783	0.183592
G1SLW8	7939	6903.2	7108.1	7291.5	7557.6	4739.3	Eukaryotic translation initiation factor 3 subunit M OS=Oryctolagus cuniculus OX=9986 GN=EIF3M PE=1 SV=2	0.892398	-0.164241	0.454964
G1TSG1	954.9	830.4	770.5	941.9	822.7	1528.3	Uncharacterized protein OS=Oryctolagus cuniculus OX=9986 GN=RPL22 PE=1 SV=1	1.2884	0.365584	0.335677
G1U7C5	2159.1	1877.6	1812.8	1642.6	1789	841.9	Ribosome binding protein 1 OS=Oryctolagus cuniculus OX=9986 GN=RRBP1 PE=4 SV=1	0.730575	-0.452896	0.168525
G1SF84	1501.2	1305.7	1450.2	1507.6	1552.5	1176.3	IQ motif and Sec7 domain 1 OS=Oryctolagus cuniculus OX=9986 GN=IQSEC1 PE=4 SV=2	0.995138	-0.00703149	0.960903
G1T4Z1	83789.5	72887.7	82171.2	96748	78949.8	81795.5	LDL receptor related protein 1 OS=Oryctolagus cuniculus OX=9986 GN=LRP1 PE=4 SV=1	1.07806	0.10844	0.3919
G1T557	1685.9	1466.5	1771.5	1757.9	1622.1	1777.2	Trafficking protein particle complex 8 OS=Oryctolagus cuniculus OX=9986 GN=TRAPPC8 PE=4 SV=1	1.04738	0.0667863	0.492679
G1U7L1	6897.7	6000.5	7283.6	6799.1	5019.7	8436.1	Uncharacterized protein OS=Oryctolagus cuniculus OX=9986 GN=LOC100358162 PE=1 SV=1	1.00362	0.005216	0.982716
G1T026	1061.1	923.1	962.9	904.2	1007.1	568.6	Proteasome 26S subunit, non-ATPase 10 OS=Oryctolagus cuniculus OX=9986 GN=PSMD10 PE=4 SV=1	0.841471	-0.249015	0.324043
G1SX88	7001.5	6091.1	6191.8	5420.1	5807.5	3143.6	Rho GTPase activating protein 18 OS=Oryctolagus cuniculus OX=9986 GN=ARHGAP18 PE=4 SV=2	0.745224	-0.424254	0.136068
G1TD16	6566.9	5713.8	5927.5	5701.9	6290.6	6041.7	Phosphatidylinositol-5-phosphate 4-kinase type 2 alpha OS=Oryctolagus cuniculus OX=9986 GN=PIP4K2A PE=4 SV=1	0.990444	-0.0138527	0.859748
G1T8S4	2672.7	2325.6	2511.3	2046.2	2370.2	2339.4	Clustered mitochondria protein homolog OS=Oryctolagus cuniculus OX=9986 GN=CLUH PE=3 SV=1	0.899622	-0.152609	0.155795
G1THI7	488.6	425.2	470.9	451.3	399.8	891.1	Zinc finger protein 706 OS=Oryctolagus cuniculus OX=9986 GN=ZNF706 PE=4 SV=1	1.25818	0.331337	0.490195
G1SUU7	11680.6	10164.7	11551.5	11683.8	12399.2	10651.4	tRNA-splicing ligase RtcB homolog OS=Oryctolagus cuniculus OX=9986 GN=RTCB PE=3 SV=2	1.04005	0.0566557	0.559851
G1TTB2	4394	3823.9	3600.2	3562.9	4051.7	3414.9	Rabaptin, RAB GTPase binding effector protein 2 OS=Oryctolagus cuniculus OX=9986 GN=RABEP2 PE=4 SV=2	0.933272	-0.0996305	0.436999
G1SWH7	277.9	241.9	271.7	276.7	276.6	194.5	Uncharacterized protein OS=Oryctolagus cuniculus OX=9986 GN=MS4A6A PE=4 SV=2	0.944788	-0.0819375	0.647905
G1T1S0	1006.5	876.1	961.9	1182.4	1170.5	689.5	Uncharacterized protein OS=Oryctolagus cuniculus OX=9986 PE=4 SV=2	1.06957	0.097035	0.712674
G1TGZ8	112.3	97.7	118	105.8	140.3	120.8	Uncharacterized protein OS=Oryctolagus cuniculus OX=9986 PE=4 SV=1	1.1186	0.161692	0.328964
G1TB43	318.1	276.9	284.5	260.8	349	321.5	B cell CLL/lymphoma 10 OS=Oryctolagus cuniculus OX=9986 GN=BCL10 PE=4 SV=1	1.0589	0.0825623	0.583221
G1TQW2	874.8	761.5	870.1	898.7	897.9	892.6	Nuclear respiratory factor 1 OS=Oryctolagus cuniculus OX=9986 GN=NRF1 PE=4 SV=1	1.07293	0.10156	0.175463
G1SIF2	13564.7	11808.2	12344.7	13648.7	13644.4	14378.9	Phosphoenolpyruvate carboxykinase 2, mitochondrial OS=Oryctolagus cuniculus OX=9986 GN=PCK2 PE=3 SV=1	1.10484	0.14384	0.083333
G1SYM2	18249.3	15886.8	15328.8	15024.1	20010.4	11486.1	Syntaxin binding protein 2 OS=Oryctolagus cuniculus OX=9986 GN=STXBP2 PE=3 SV=1	0.940477	-0.0885354	0.727918
G1SI90	8076.1	7031.7	7311.9	8469.5	8803.4	5911.2	ATP binding cassette subfamily C member 3 OS=Oryctolagus cuniculus OX=9986 GN=ABCC3 PE=4 SV=2	1.03409	0.0483687	0.804864
G1SGR0	277.5	241.6	251.6	249.6	249.5	441.3	VPS8, CORVET complex subunit OS=Oryctolagus cuniculus OX=9986 GN=VPS8 PE=4 SV=2	1.22019	0.287105	0.432002
G1TDA0	335.9	292.6	334.2	293.8	302.8	415.7	2-oxoglutarate and iron dependent oxygenase domain containing 1 OS=Oryctolagus cuniculus OX=9986 GN=OGFOD1 PE=4 SV=1	1.05152	0.072479	0.711971
G1TCK9	12262	10679.1	11220	11065.1	11897	8710.4	Isoleucyl-tRNA synthetase OS=Oryctolagus cuniculus OX=9986 GN=IARS PE=3 SV=2	0.927151	-0.109124	0.47812
G1SNZ2	367.9	320.4	355.5	409.6	383.5	931	WD repeat domain 48 OS=Oryctolagus cuniculus OX=9986 GN=WDR48 PE=4 SV=1	1.65175	0.723998	0.273665
G1TDT3	6510.4	5670.2	5945.9	4946.1	5886.3	3705.2	Uncharacterized protein OS=Oryctolagus cuniculus OX=9986 GN=TBCE PE=4 SV=1	0.802008	-0.318311	0.152561
G1T0X6	204.5	178.1	209.4	212.9	204.2	184.3	Chromosome 6 open reading frame 203 OS=Oryctolagus cuniculus OX=9986 GN=C6orf203 PE=4 SV=2	1.01588	0.0227272	0.819886
G1T3P2	6047	5267.5	5941.1	5975.9	5556.7	5351.8	Protein tyrosine phosphatase, non-receptor type 9 OS=Oryctolagus cuniculus OX=9986 GN=PTPN9 PE=4 SV=2	0.978488	-0.0313739	0.706176
G1T5M0	11350.8	9888.7	12379.3	11835.7	12685.6	10260	Ornithine aminotransferase OS=Oryctolagus cuniculus OX=9986 GN=OAT PE=3 SV=1	1.03458	0.0490438	0.721643
G1TFB5	8679.8	7562.8	8473.3	9419.6	8286.7	6583.5	RAB18, member RAS oncogene family OS=Oryctolagus cuniculus OX=9986 GN=RAB18 PE=4 SV=1	0.98276	-0.025089	0.881307
G1SUC8	7028.4	6124	6788	7021.5	6807.9	5851.4	Eukaryotic translation initiation factor 3 subunit E OS=Oryctolagus cuniculus OX=9986 GN=EIF3E PE=1 SV=2	0.986981	-0.0189058	0.856903
G1TKG2	1448.1	1261.9	1527.2	1559.9	1527.1	906.2	Isochorismatase domain containing 2 OS=Oryctolagus cuniculus OX=9986 GN=ISOC2 PE=4 SV=1	0.942415	-0.0855656	0.737923
G1SFT6	1559.6	1359	1413.1	1470.8	2022.9	1300.8	HPS1, biogenesis of lysosomal organelles complex 3 subunit 1 OS=Oryctolagus cuniculus OX=9986 GN=HPS1 PE=4 SV=1	1.10684	0.146447	0.53243
G1SGT2	856.5	746.5	824	800.7	766.3	576.3	FCH and double SH3 domains 1 OS=Oryctolagus cuniculus OX=9986 GN=FCHSD1 PE=4 SV=1	0.883107	-0.17934	0.286872
G1SHZ8	30335.2	26437.9	27571.1	25282.1	27523	27671.4	Chaperonin containing TCP1 subunit 8 OS=Oryctolagus cuniculus OX=9986 GN=CCT8 PE=3 SV=2	0.954144	-0.0677211	0.406702
G1U8Y7	376	327.8	366.8	328.4	313.6	271.1	Uncharacterized protein OS=Oryctolagus cuniculus OX=9986 PE=4 SV=2	0.852886	-0.229575	0.08136
G1SIB2	3129	2728.2	2998.1	2877.9	3860	2768.3	Methylenetetrahydrofolate dehydrogenase (NADP+ dependent) 1 like OS=Oryctolagus cuniculus OX=9986 GN=MTHFD1L PE=3 SV=2	1.0735	0.102328	0.58578
G1ST12	3348.7	2920	3154.2	3150.3	2961.5	4467.7	Sorting nexin family member 27 OS=Oryctolagus cuniculus OX=9986 GN=SNX27 PE=4 SV=1	1.12274	0.167029	0.475133
G1TVR9	2407.2	2099.1	2252.8	2034.2	2121.6	1570.2	BRCA1/BRCA2-containing complex subunit 3 OS=Oryctolagus cuniculus OX=9986 GN=BRCC3 PE=4 SV=2	0.847154	-0.239304	0.148681
G1U6X6	1602.2	1397.2	1523.3	1586.6	1508.1	1662.6	Uncharacterized protein OS=Oryctolagus cuniculus OX=9986 GN=HNRNPH2 PE=4 SV=1	1.05187	0.0729592	0.353223
G1SKQ8	1227.4	1070.5	1108.2	1106.8	1039.9	1827.2	KRR1 small subunit processome component OS=Oryctolagus cuniculus OX=9986 GN=KRR1 PE=3 SV=1	1.1667	0.222435	0.501411
G1SXC4	169.5	147.8	175.7	165.7	168.2	219.9	T-lymphocyte activation antigen CD80 OS=Oryctolagus cuniculus OX=9986 GN=CD80 PE=4 SV=1	1.12333	0.167778	0.359224
G1SKI9	217.7	189.9	194.1	188.6	184.6	223.8	RNA helicase OS=Oryctolagus cuniculus OX=9986 GN=DDX10 PE=3 SV=1	0.992189	-0.0113131	0.922686
G1U466	27076.8	23618.9	25810.1	23405.3	22791.7	38657.6	Tubulin alpha chain OS=Oryctolagus cuniculus OX=9986 GN=TUBA1A PE=3 SV=1	1.10913	0.149423	0.626451
G1SVK9	1720.4	1500.7	1691.4	1725.2	1570.9	977	Pumilio RNA binding family member 1 OS=Oryctolagus cuniculus OX=9986 GN=PUM1 PE=4 SV=2	0.869842	-0.201175	0.421591
G1TKH3	5371.9	4686.2	4174.8	4009.1	4341.8	2007.8	Superoxide dismutase [Cu-Zn] OS=Oryctolagus cuniculus OX=9986 GN=SOD1 PE=3 SV=1	0.7278	-0.458386	0.18488
U3KP64	178.4	155.7	174.9	189.8	204.4	149.3	Uncharacterized protein OS=Oryctolagus cuniculus OX=9986 PE=4 SV=1	1.06778	0.0946144	0.556142
G1U5W5	1961.7	1711.6	1936.6	1525.8	1951.9	1130.5	Nardilysin convertase OS=Oryctolagus cuniculus OX=9986 GN=NRDC PE=4 SV=1	0.821441	-0.283771	0.252846
G1TMG8	310.1	270.6	291.2	299.8	308.4	313.6	Methyltransferase like 9 OS=Oryctolagus cuniculus OX=9986 GN=METTL9 PE=4 SV=1	1.05723	0.0802906	0.241062
G1TIR7	143.1	124.9	109.3	104.8	106.5	208.4	U6 snRNA-associated Sm-like protein LSm8 OS=Oryctolagus cuniculus OX=9986 GN=LSM8 PE=3 SV=1	1.11238	0.153646	0.711778
G1SSL5	932.3	813.8	883.9	792.6	911.9	666.5	N(alpha)-acetyltransferase 25, NatB auxiliary subunit OS=Oryctolagus cuniculus OX=9986 GN=NAA25 PE=4 SV=1	0.901521	-0.149567	0.33457
G1TA42	554	483.6	500.1	620	597.4	347.2	Choline/ethanolamine phosphotransferase 1 OS=Oryctolagus cuniculus OX=9986 GN=CEPT1 PE=3 SV=1	1.01749	0.0250203	0.925397
G1SJP3	3031.5	2646.3	3028.5	3427.7	3248.8	2253.1	Poly [ADP-ribose] polymerase OS=Oryctolagus cuniculus OX=9986 GN=PARP14 PE=4 SV=2	1.02565	0.0365357	0.856896
G1TLJ4	3769.8	3290.9	3054.9	3754.2	3516.6	4140.9	Uncharacterized protein OS=Oryctolagus cuniculus OX=9986 GN=CSF2RA PE=4 SV=2	1.12813	0.173932	0.19523
G1SGK7	1340	1169.9	1204.3	1074.3	1201	969.5	Uncharacterized protein OS=Oryctolagus cuniculus OX=9986 GN=LRRC40 PE=4 SV=1	0.87362	-0.194922	0.138452
G1SXW0	15448.3	13487.8	14050.7	16361	17104.8	12299.6	Glycerol-3-phosphate dehydrogenase OS=Oryctolagus cuniculus OX=9986 GN=GPD2 PE=3 SV=2	1.06464	0.090363	0.594367
G1T0M2	3179.6	2776.2	3180.2	3044.4	2872	2128.8	tRNA methyltransferase 10C, mitochondrial RNase P subunit OS=Oryctolagus cuniculus OX=9986 GN=TRMT10C PE=4 SV=2	0.880604	-0.183435	0.307915
G1T466	2919.6	2549.5	2931.9	2312.4	2777.6	2517.3	Ubiquitin like modifier activating enzyme 6 OS=Oryctolagus cuniculus OX=9986 GN=UBA6 PE=4 SV=1	0.905523	-0.143177	0.223883
G1SN26	4633.5	4047.3	3980.5	4392	4482.5	3612	Peptidylprolyl isomerase OS=Oryctolagus cuniculus OX=9986 GN=FKBP15 PE=4 SV=1	0.986194	-0.0200566	0.874266
G1T0A3	394.3	344.4	385.3	387.7	380.5	348.9	C-type lectin domain family 4 member A OS=Oryctolagus cuniculus OX=9986 GN=CLEC4A PE=4 SV=1	0.993861	-0.008884	0.911505
G1TVI8	10123.4	8843.6	8945.6	8834.4	11448.3	6399.9	Sterile alpha motif domain containing 9 like OS=Oryctolagus cuniculus OX=9986 GN=SAMD9L PE=4 SV=1	0.955934	-0.0650171	0.799991
G1SRK1	6162.2	5384.1	6373.8	7946.1	7309.4	5201.7	Lysophosphatidylcholine acyltransferase 2 OS=Oryctolagus cuniculus OX=9986 GN=LPCAT2 PE=4 SV=2	1.14158	0.191029	0.392037
G1T2R7	16615.8	14518.6	16865.3	14624.1	16896.5	11566.6	Formin like 1 OS=Oryctolagus cuniculus OX=9986 GN=FMNL1 PE=4 SV=1	0.897656	-0.155765	0.393522
G1SN17	2994.9	2617.2	2644.1	2413.7	2865.3	1725.7	Protein phosphatase 4 regulatory subunit 1 OS=Oryctolagus cuniculus OX=9986 GN=PPP4R1 PE=4 SV=2	0.848417	-0.237155	0.302701
G1SZ34	1244.4	1087.7	1177.7	1174.5	1208.1	875.7	CDC42 binding protein kinase beta OS=Oryctolagus cuniculus OX=9986 GN=CDC42BPB PE=3 SV=1	0.928343	-0.10727	0.506361
G1T143	3984.7	3483.2	4580.7	3753.8	4231.3	2392.5	Tripartite motif containing 25 OS=Oryctolagus cuniculus OX=9986 GN=TRIM25 PE=4 SV=1	0.861312	-0.215392	0.430374
G1SQ57	1960.2	1713.5	1924.1	1945.3	1823.8	1570.3	ADP ribosylation factor GTPase activating protein 1 OS=Oryctolagus cuniculus OX=9986 GN=ARFGAP1 PE=4 SV=2	0.953839	-0.0681823	0.557071
G1TE21	668.1	584	649	583.3	591.6	582.8	Family with sequence similarity 160 member B1 OS=Oryctolagus cuniculus OX=9986 GN=FAM160B1 PE=4 SV=2	0.92457	-0.113146	0.135428
G1T8R1	6075.1	5311.2	5874.6	4984.2	6083.1	3242.4	Platelet-activating factor acetylhydrolase IB subunit alpha OS=Oryctolagus cuniculus OX=9986 GN=RAP1GAP2 PE=3 SV=1	0.829024	-0.270514	0.315514
G1SW94	1620.4	1416.7	1678.7	1615.1	1671.5	1777.2	Cytohesin 1 OS=Oryctolagus cuniculus OX=9986 GN=CYTH1 PE=4 SV=1	1.07379	0.102717	0.278314
G1TUD6	9551.8	8351.6	8510.8	8426.5	8878.8	7470.7	Proteasome 26S subunit, ATPase 4 OS=Oryctolagus cuniculus OX=9986 GN=PSMC4 PE=3 SV=2	0.93798	-0.0923709	0.384928
G1U153	1132.8	990.7	1246.3	1167.6	1005.6	696.8	Uncharacterized protein OS=Oryctolagus cuniculus OX=9986 PE=4 SV=1	0.851683	-0.231612	0.347467
G1T2D8	33232.1	29066.5	30230.1	33922.9	39856.8	38684.4	Protein tyrosine phosphatase, receptor type C OS=Oryctolagus cuniculus OX=9986 GN=PTPRC PE=4 SV=2	1.21545	0.281492	0.039047
G1SVZ2	2856.5	2498.8	2390.5	2663.2	2764.5	2301.3	P2X purinoceptor OS=Oryctolagus cuniculus OX=9986 GN=P2RX7 PE=3 SV=1	0.997831	-0.0031326	0.978895
G1T518	501.4	438.7	447	524.8	645.7	477.9	ADP ribosylation factor like GTPase 6 interacting protein 6 OS=Oryctolagus cuniculus OX=9986 GN=ARL6IP6 PE=4 SV=1	1.18838	0.248995	0.180215
G1SI44	3654.2	3197	3670.1	4187.7	3633.7	3306.4	Poly(ADP-ribose) polymerase family member 9 OS=Oryctolagus cuniculus OX=9986 GN=PARP9 PE=4 SV=1	1.05764	0.0808555	0.537776
G1U1M3	2520.2	2204.9	2331.9	2004.2	2236.5	1343.9	Aminoacyl tRNA synthetase complex interacting multifunctional protein 1 OS=Oryctolagus cuniculus OX=9986 GN=AIMP1 PE=4 SV=2	0.791356	-0.337601	0.157457
G1SMX4	28308.7	24768.3	26253	24078.6	27385.7	18911.1	Diaphanous related formin 1 OS=Oryctolagus cuniculus OX=9986 GN=DIAPH1 PE=4 SV=1	0.887122	-0.172796	0.326376
G1TWB9	3841.9	3361.7	3603.4	3597.6	3536.8	2460.9	TBC1 domain family member 5 OS=Oryctolagus cuniculus OX=9986 GN=TBC1D5 PE=4 SV=2	0.887878	-0.171567	0.363631
G1T9I3	1394.3	1220.4	1264	1240.4	1284.6	665.2	Phospholipase A2 activating protein OS=Oryctolagus cuniculus OX=9986 GN=PLAA PE=4 SV=2	0.822492	-0.281926	0.328154
G1SHQ9	2426.5	2123.8	2431.8	2035.9	2259.5	1666.1	Acidic residue methyltransferase 1 OS=Oryctolagus cuniculus OX=9986 GN=ARMT1 PE=4 SV=1	0.853826	-0.227986	0.165386
G1T9K0	1600	1400.4	1720	1886.4	1749	1290.4	Crooked neck pre-mRNA splicing factor 1 OS=Oryctolagus cuniculus OX=9986 GN=CRNKL1 PE=4 SV=1	1.04351	0.0614486	0.752711
G1TY83	3724.8	3260.4	3678.2	4178.3	3624.2	3082.5	NLR family member X1 OS=Oryctolagus cuniculus OX=9986 GN=NLRX1 PE=4 SV=1	1.02078	0.0296734	0.842768
G1TC19	6684.1	5851.2	6319.2	7362.3	7060	5296.4	Carnitine palmitoyltransferase 2 OS=Oryctolagus cuniculus OX=9986 GN=CPT2 PE=3 SV=2	1.04584	0.0646553	0.696861
G1SDM6	15622.8	13679.7	15553.6	17247.9	15551.7	13334.3	DnaJ heat shock protein family (Hsp40) member C13 OS=Oryctolagus cuniculus OX=9986 GN=DNAJC13 PE=4 SV=1	1.02849	0.0405236	0.759547
G1SLS3	3789.5	3318.4	3811.9	3567	3759.9	2784.8	AP-1 complex subunit gamma OS=Oryctolagus cuniculus OX=9986 GN=AP1G1 PE=3 SV=2	0.925997	-0.110921	0.471059
O19048	8781.7	7690.2	8198.3	7303.7	7830.3	9320.9	Poly(rC)-binding protein 1 OS=Oryctolagus cuniculus OX=9986 GN=PCBP1 PE=2 SV=1	0.991273	-0.0126457	0.921193
G1SIP6	2364.4	2070.6	2249.7	2266.7	2518.2	1875.3	CDGSH iron sulfur domain 1 OS=Oryctolagus cuniculus OX=9986 GN=CISD1 PE=4 SV=1	0.996335	-0.00529719	0.970227
B7NZD2	7382.6	6465.2	6426.8	6510.1	6511.3	5878.9	Proteasome 26S subunit, non-ATPase, 4 (Predicted) OS=Oryctolagus cuniculus OX=9986 GN=PSMD4 PE=4 SV=1	0.932216	-0.101264	0.290868
G1SPE4	8998.5	7880.4	8212.8	8200	8339.4	5897.4	Structural maintenance of chromosomes 2 OS=Oryctolagus cuniculus OX=9986 GN=SMC2 PE=4 SV=2	0.894192	-0.161343	0.360809
U3KPE7	2754.3	2412.2	2353.8	2929.3	2966.4	1993.3	Aldose reductase OS=Oryctolagus cuniculus OX=9986 GN=AKR1B1 PE=4 SV=1	1.04903	0.0690518	0.737489
G1SNU8	992.3	869.3	882.1	842.1	1827.5	999.6	Inositol polyphosphate-5-phosphatase B OS=Oryctolagus cuniculus OX=9986 GN=INPP5B PE=4 SV=1	1.33732	0.419343	0.373346
G1U850	371.7	325.7	387.5	350.6	341.8	131.9	CCR4-NOT transcription complex subunit 11 OS=Oryctolagus cuniculus OX=9986 GN=CNOT11 PE=4 SV=1	0.759794	-0.39632	0.304675
G1T7A8	1665	1458.7	1460.4	1394.7	1382.1	1388.3	Carboxypeptidase Q OS=Oryctolagus cuniculus OX=9986 GN=CPQ PE=4 SV=1	0.908597	-0.138288	0.111386
G1SE12	10221.9	8956.1	9530.1	10660.4	11441.3	8394.8	Electron transfer flavoprotein subunit alpha OS=Oryctolagus cuniculus OX=9986 GN=ETFA PE=4 SV=2	1.0623	0.0871858	0.577384
G1SD49	1845.2	1616.8	1546.9	1550.8	1724.8	790.5	Dynactin subunit 3 OS=Oryctolagus cuniculus OX=9986 GN=DCTN3 PE=4 SV=1	0.811775	-0.300848	0.354928
G1T2B8	1525.5	1336.7	1422.4	1402.7	1265.7	2175	Uncharacterized protein OS=Oryctolagus cuniculus OX=9986 GN=ECE1 PE=4 SV=2	1.13042	0.17686	0.553366
G1TF29	4220.7	3698.6	4455.1	4349.8	4512.6	4034.1	Phospholipid-transporting ATPase OS=Oryctolagus cuniculus OX=9986 GN=ATP8A1 PE=3 SV=2	1.04219	0.0596211	0.54584
G1TKQ8	3606.8	3160.9	3429.7	3211	3487.2	2540.9	Uncharacterized protein OS=Oryctolagus cuniculus OX=9986 GN=UBE3A PE=4 SV=2	0.906025	-0.142377	0.360221
B7NZN8	7612	6671.3	7168.1	7966.2	7702.1	9709.4	Isocitrate dehydrogenase [NAD] subunit, mitochondrial OS=Oryctolagus cuniculus OX=9986 GN=IDH3G PE=3 SV=1	1.18303	0.242489	0.128999
G1T211	2764.2	2422.8	2468.4	2526.6	2418.9	1592.3	Family with sequence similarity 91 member A1 OS=Oryctolagus cuniculus OX=9986 GN=FAM91A1 PE=4 SV=1	0.854012	-0.227672	0.301016
P26202	3688.7	3233.3	2700.1	3243.3	3539.2	8463	15 kDa protein A OS=Oryctolagus cuniculus OX=9986 PE=1 SV=2	1.58442	0.663959	0.336229
G1SM77	14733.7	12915.1	12586.8	15537	13866	18707.1	ATP synthase subunit gamma OS=Oryctolagus cuniculus OX=9986 GN=ATP5F1C PE=3 SV=1	1.19571	0.257868	0.169621
G1SK22	22587.8	19805.4	22611.8	22086.1	20919	23690.6	Uncharacterized protein OS=Oryctolagus cuniculus OX=9986 GN=LOC100348379 PE=1 SV=1	1.02601	0.0370434	0.670631
G1T9H4	1329.2	1165.6	1398.3	1425.9	1521.6	974	Mannosyl (alpha-1,6-)-glycoprotein beta-1,2-N-acetylglucosaminyltransferase OS=Oryctolagus cuniculus OX=9986 GN=MGAT2 PE=4 SV=1	1.0073	0.0104863	0.961099
G1TL88	496.8	435.6	478.4	509.7	525.5	298.3	Uncharacterized protein OS=Oryctolagus cuniculus OX=9986 PE=4 SV=1	0.945208	-0.0812963	0.749916
G1SUE3	956.3	838.6	912	766.4	767.6	740.9	Eukaryotic elongation factor 2 kinase OS=Oryctolagus cuniculus OX=9986 GN=EEF2K PE=3 SV=1	0.840408	-0.250838	0.015263
G1SV53	1206.2	1058	1094.2	1026.3	1050	669.8	Uncharacterized protein OS=Oryctolagus cuniculus OX=9986 PE=4 SV=2	0.817681	-0.29039	0.193723
G1SWD9	2593.8	2275.3	2685.2	2190.3	2588.3	3101.1	Cysteinyl-tRNA synthetase OS=Oryctolagus cuniculus OX=9986 GN=CARS PE=4 SV=1	1.04307	0.0608429	0.72863
G1SED9	10522.1	9230.7	9849.6	10101.2	10149.6	8029	Eukaryotic translation initiation factor 3 subunit L OS=Oryctolagus cuniculus OX=9986 GN=EIF3L PE=1 SV=1	0.955321	-0.0659425	0.607524
G1T4T5	2271.9	1993.1	2238	2616.4	2085.2	2187.7	Methyl-CpG-binding protein 2 OS=Oryctolagus cuniculus OX=9986 GN=MECP2 PE=4 SV=2	1.0594	0.0832515	0.524497
G1SQA9	509.9	447.4	494	500.7	509.8	393.6	WD repeat domain 92 OS=Oryctolagus cuniculus OX=9986 GN=WDR92 PE=4 SV=1	0.967477	-0.0477007	0.725473
G1TB29	2687.3	2357.7	2415.9	2274.9	2500.3	1665	Thymocyte selection associated family member 2 OS=Oryctolagus cuniculus OX=9986 GN=THEMIS2 PE=4 SV=2	0.863193	-0.212245	0.275189
G1SQ90	801.4	703.1	808.4	682.5	778.5	391.8	Collagen type IV alpha 3 binding protein OS=Oryctolagus cuniculus OX=9986 GN=COL4A3BP PE=4 SV=1	0.801072	-0.319996	0.274147
G1T6S6	1429.9	1254.6	1186	1323.8	1570.3	1349.8	V-type proton ATPase subunit F OS=Oryctolagus cuniculus OX=9986 GN=ATP6V1F PE=3 SV=1	1.09647	0.13287	0.308268
G1SJR2	1168.2	1025.1	1066.9	1146.3	1149.8	689.2	Regulation of nuclear pre-mRNA domain containing 1B OS=Oryctolagus cuniculus OX=9986 GN=RPRD1B PE=4 SV=1	0.91568	-0.127085	0.594709
G1SRZ6	3267.6	2867.4	3261.3	2831.1	3413.3	2206.7	Biliverdin reductase A OS=Oryctolagus cuniculus OX=9986 GN=BLVRA PE=4 SV=2	0.899407	-0.152954	0.445492
G1TWU1	1378.4	1209.9	1400.1	1581.4	1495.4	1145.9	Torsin OS=Oryctolagus cuniculus OX=9986 GN=TOR1B PE=3 SV=2	1.05875	0.0823552	0.621295
G1TCV7	274.3	240.8	247.8	257.5	213.1	195.7	Axin interactor, dorsalization associated OS=Oryctolagus cuniculus OX=9986 GN=AIDA PE=4 SV=2	0.873378	-0.195322	0.200627
G1T060	14471.7	12703	13398.8	15390.8	14177	15127.6	Hydroxysteroid 17-beta dehydrogenase 4 OS=Oryctolagus cuniculus OX=9986 GN=HSD17B4 PE=4 SV=2	1.10159	0.139589	0.095707
G1T0H9	3728.3	3272.8	3507.6	3537.9	3487.3	2265.5	Exocyst complex component 3 OS=Oryctolagus cuniculus OX=9986 GN=EXOC3 PE=4 SV=2	0.884096	-0.177725	0.404713
G1T3N0	605.2	531.3	622.2	500.3	635.5	499.8	Sphingomyelin phosphodiesterase acid like 3B OS=Oryctolagus cuniculus OX=9986 GN=SMPDL3B PE=4 SV=2	0.930005	-0.10469	0.482605
G1SEX5	2281	2002.7	2139.5	2004.7	2044.1	1258.1	SH3 domain containing GRB2 like 2, endophilin A1 OS=Oryctolagus cuniculus OX=9986 GN=SH3GL2 PE=4 SV=1	0.826208	-0.275423	0.237341
G1TR26	2903.4	2549.6	2651.7	2906.8	2924.7	2068.1	Mitochondrial ribosomal protein L11 OS=Oryctolagus cuniculus OX=9986 GN=MRPL11 PE=3 SV=2	0.974694	-0.0369787	0.831742
G1U4A0	1239.1	1088.3	1240.2	1138.7	1146.2	988.7	FERM domain containing 8 OS=Oryctolagus cuniculus OX=9986 GN=FRMD8 PE=4 SV=2	0.917592	-0.124075	0.244829
G1T098	799.6	702.2	778.7	860.4	967.5	813.8	N-acetylglucosamine-1-phosphodiester alpha-N-acetylglucosaminidase OS=Oryctolagus cuniculus OX=9986 GN=NAGPA PE=4 SV=1	1.15839	0.212116	0.090817
B7NZM8	11994.9	10535	9838	8752	10926.2	6822.8	Tyrosine 3-monooxygenase/tryptophan 5-monooxygenase activation protein, eta polypeptide (Predicted) OS=Oryctolagus cuniculus OX=9986 GN=YWHAH PE=3 SV=1	0.818743	-0.288517	0.219585
G1SGQ0	4406.5	3870.3	4596.6	5372	4130.4	4717.1	Uncharacterized protein OS=Oryctolagus cuniculus OX=9986 GN=DNAJB11 PE=4 SV=1	1.10456	0.143477	0.344925
G1SG47	8475.1	7444.4	8813.2	9131.2	8968.2	7738.6	SWI/SNF related, matrix associated, actin dependent regulator of chromatin, subfamily a, member 4 OS=Oryctolagus cuniculus OX=9986 GN=SMARCA4 PE=4 SV=1	1.04469	0.0630749	0.573742
G1TBW9	2066.3	1815.7	2145.2	1823.1	1886.4	1494.2	Dynein light chain OS=Oryctolagus cuniculus OX=9986 GN=DYNLL2 PE=3 SV=1	0.863369	-0.211951	0.155275
G1SK00	11041.6	9703	10231.2	8209.6	9554.3	6871.1	Ubiquitinyl hydrolase 1 OS=Oryctolagus cuniculus OX=9986 GN=USP5 PE=3 SV=2	0.795298	-0.330433	0.071351
G1SQQ2	1603.5	1409.1	1620.4	1671.8	1520.6	1130	Tuftelin-interacting protein 11 OS=Oryctolagus cuniculus OX=9986 GN=TFIP11 PE=3 SV=1	0.932959	-0.100114	0.58607
G1TUW9	235.9	207.3	216	230.8	278.9	277.4	Uncharacterized protein OS=Oryctolagus cuniculus OX=9986 GN=DEGS1 PE=3 SV=2	1.19402	0.255831	0.07601
G1SDG2	4537.1	3987.1	4446.6	3949.5	4666.9	3529	Phosphatidylinositol transfer protein beta OS=Oryctolagus cuniculus OX=9986 GN=PITPNB PE=4 SV=1	0.936365	-0.0948571	0.50198
G1TDF6	9305.7	8178	9969.6	10436.1	9973.2	7561.4	Flotillin 1 OS=Oryctolagus cuniculus OX=9986 GN=FLOT1 PE=4 SV=1	1.01885	0.0269374	0.875535
G1T7I4	21668.2	19044.3	21838.9	21029.1	21470.5	17919.2	Coatomer subunit alpha OS=Oryctolagus cuniculus OX=9986 GN=COPA PE=4 SV=2	0.965906	-0.0500453	0.646898
G1TEP3	237.4	208.7	206.6	224.1	213.3	1682.9	NFKB inhibitor epsilon OS=Oryctolagus cuniculus OX=9986 GN=NFKBIE PE=4 SV=1	3.24851	1.69978	0.373003
G1T495	935	822	882.2	764.8	893.7	612.5	Heat shock protein family A (Hsp70) member 14 OS=Oryctolagus cuniculus OX=9986 GN=HSPA14 PE=3 SV=1	0.860488	-0.216773	0.233718
G1SMK6	1622.1	1426.4	1527.4	1615.4	1422.8	1185.4	Derlin OS=Oryctolagus cuniculus OX=9986 GN=DERL2 PE=3 SV=1	0.92301	-0.115582	0.438401
G1TVC8	2500.3	2198.7	2466	2547.3	2491.2	2219.5	Cell division cycle 27 OS=Oryctolagus cuniculus OX=9986 GN=CDC27 PE=4 SV=2	1.01298	0.0186057	0.834499
G1SKY1	1998.7	1757.7	1814.8	1785.4	1964.1	2185.2	Negative regulator of ubiquitin like proteins 1 OS=Oryctolagus cuniculus OX=9986 GN=NUB1 PE=4 SV=2	1.06525	0.0911866	0.42515
G1T5C2	250.1	219.9	236.8	238.2	290.8	224	A-kinase anchoring protein 10 OS=Oryctolagus cuniculus OX=9986 GN=AKAP10 PE=4 SV=2	1.06536	0.0913478	0.52459
B7NZG9	7454.2	6557	7513.8	8314.6	7280.7	5051.3	Stromal antigen 2 isoform a (Predicted) OS=Oryctolagus cuniculus OX=9986 GN=STAG2 PE=4 SV=1	0.959192	-0.0601085	0.786582
G1TZZ6	69.7	61.3	69.4	54.4	57	153.7	Uncharacterized protein OS=Oryctolagus cuniculus OX=9986 PE=4 SV=2	1.32285	0.403654	0.546653
G1SCQ4	208.4	183.3	198.8	227.4	194.7	175.6	ST3 beta-galactoside alpha-2,3-sialyltransferase 1 OS=Oryctolagus cuniculus OX=9986 GN=ST3GAL1 PE=3 SV=1	1.01219	0.0174844	0.893304
G1TVK1	1087.7	957	1044.6	1119.4	958.9	973.2	Uncharacterized protein OS=Oryctolagus cuniculus OX=9986 PE=4 SV=2	0.987764	-0.0177617	0.853744
G1TLH1	2227.1	1959.4	1732.9	1490.8	1742.1	1163.5	Glutathione S-transferase mu 4 OS=Oryctolagus cuniculus OX=9986 GN=GSTM4 PE=4 SV=1	0.74271	-0.429129	0.082377
G1SUN8	462	406.5	344.3	441.3	446.5	733.8	Maltase-glucoamylase OS=Oryctolagus cuniculus OX=9986 GN=MGAM PE=4 SV=2	1.33707	0.419076	0.254262
G1SNE9	3649.9	3212	3550.3	3170	3792.5	2576.7	ABR, RhoGEF and GTPase activating protein OS=Oryctolagus cuniculus OX=9986 GN=ABR PE=4 SV=1	0.916156	-0.126335	0.481282
G1SZQ5	1920.2	1690	2010.1	2109.6	2326.6	4261.1	Integrator complex subunit 4 OS=Oryctolagus cuniculus OX=9986 GN=INTS4 PE=4 SV=1	1.54748	0.629921	0.211613
G1SQ45	6568.3	5781.8	6265.7	7333.1	6708.9	5801.2	THO complex 2 OS=Oryctolagus cuniculus OX=9986 GN=THOC2 PE=4 SV=1	1.06593	0.0921168	0.45936
P06815	2657.2	2339.2	2619.9	2217.8	2391.3	4119.6	Calpain-1 catalytic subunit (Fragment) OS=Oryctolagus cuniculus OX=9986 GN=CAPN1 PE=1 SV=1	1.14606	0.196676	0.579266
G1T8P7	9049.2	7966.2	8540.7	9264.3	9303.1	6442.7	Protein transport protein SEC23 OS=Oryctolagus cuniculus OX=9986 GN=SEC23B PE=3 SV=1	0.978635	-0.0311572	0.864085
G1TM56	697.9	614.3	705.3	687.9	737.6	704.9	Solute carrier family 37 member 2 OS=Oryctolagus cuniculus OX=9986 GN=SLC37A2 PE=4 SV=2	1.05596	0.0785552	0.312869
G1U7Z9	957.6	843.2	996	954.1	915.6	537.1	CDC42 small effector 1 OS=Oryctolagus cuniculus OX=9986 GN=CDC42SE1 PE=4 SV=1	0.860555	-0.216661	0.407927
G1TBE5	678.4	597.5	665.6	778.4	811.8	708.4	Ergosterol biosynthesis 28 homolog OS=Oryctolagus cuniculus OX=9986 GN=ERG28 PE=4 SV=1	1.18393	0.243584	0.03935
G1STX3	5802.5	5110.6	5452.3	5725.2	5529.7	3995.3	Sec1 family domain containing 1 OS=Oryctolagus cuniculus OX=9986 GN=SCFD1 PE=3 SV=1	0.931856	-0.101821	0.557938
G1SLI8	1905.4	1678.2	1930.9	1882	1863.4	1932.8	DEAD-box helicase 42 OS=Oryctolagus cuniculus OX=9986 GN=DDX42 PE=4 SV=2	1.02968	0.0422031	0.546609
U3KMP1	8266.2	7281.3	8132.3	9110.6	7934	5921.7	RAB10, member RAS oncogene family OS=Oryctolagus cuniculus OX=9986 GN=RAB10 PE=4 SV=1	0.969869	-0.0441382	0.820325
G1T135	610	537.3	526.8	621.1	585.5	361.9	Tetraspanin 13 OS=Oryctolagus cuniculus OX=9986 GN=TSPAN13 PE=3 SV=1	0.936921	-0.0940007	0.700798
G1SH46	833.5	734.4	746.5	817.6	836.9	850.1	Transmembrane anterior posterior transformation 1 OS=Oryctolagus cuniculus OX=9986 GN=TAPT1 PE=4 SV=1	1.08218	0.113942	0.123764
G1TIX0	2740.5	2414.4	2750.2	2772.5	2544.1	2339.8	ADP ribosylation factor like GTPase 8A OS=Oryctolagus cuniculus OX=9986 GN=ARL8A PE=3 SV=1	0.968539	-0.046118	0.645113
G1TS78	5496.1	4842.7	4747	6454.7	5891.8	5171.1	Histocompatibility minor 13 OS=Oryctolagus cuniculus OX=9986 GN=HM13 PE=4 SV=1	1.1612	0.215614	0.139075
G1SG44	3554.9	3132.4	3622.1	4036.2	3364.2	3131.2	Uncharacterized protein OS=Oryctolagus cuniculus OX=9986 PE=4 SV=2	1.02155	0.0307641	0.823796
G1TBU9	12872	11343.3	13012	14259.7	14046.1	12713.8	Acetyl-CoA acyltransferase 2 OS=Oryctolagus cuniculus OX=9986 GN=ACAA2 PE=3 SV=1	1.10187	0.139953	0.154333
G1SVM1	28000.7	24680.8	25469.5	28197.1	36457.4	30738	Major vault protein OS=Oryctolagus cuniculus OX=9986 GN=MVP PE=4 SV=1	1.22062	0.287612	0.095066
G1ST15	1616.4	1425	1532.1	1562.1	1839.6	1627.3	AU RNA binding methylglutaconyl-CoA hydratase OS=Oryctolagus cuniculus OX=9986 GN=AUH PE=3 SV=1	1.0996	0.136972	0.205101
G1T2K7	127.4	112.3	140.5	122.2	109.3	163.4	Uncharacterized protein OS=Oryctolagus cuniculus OX=9986 GN=PDZD8 PE=4 SV=2	1.03866	0.054729	0.801444
G1TV19	2843.9	2507.5	2946.2	3320	2905.9	1622.2	FUS RNA binding protein OS=Oryctolagus cuniculus OX=9986 GN=FUS PE=4 SV=2	0.945828	-0.0803502	0.790663
G1U903	206.8	182.3	194.8	230.4	234.9	259.4	Leucine rich repeat containing 8 VRAC subunit D OS=Oryctolagus cuniculus OX=9986 GN=LRRC8D PE=4 SV=1	1.24114	0.311662	0.014888
G1SR29	13614.3	12004.4	12740	13104.7	15059.7	13538.9	ATPase H+ transporting V1 subunit A OS=Oryctolagus cuniculus OX=9986 GN=ATP6V1A PE=4 SV=2	1.08719	0.120608	0.213097
G1SJM6	1650.4	1455.4	1513.5	1720.6	1641.7	2042.6	High mobility group nucleosomal binding domain 3 OS=Oryctolagus cuniculus OX=9986 GN=HMGN3 PE=4 SV=1	1.17007	0.226594	0.125562
G1TQX1	3242.1	2859.5	2854.6	2917.4	2757.4	2388.6	Signal recognition particle 14 OS=Oryctolagus cuniculus OX=9986 GN=SRP14 PE=4 SV=1	0.900315	-0.151498	0.215523
G1TEA5	3107.7	2741	2761.1	2446.9	3099.1	1977.2	GMP reductase OS=Oryctolagus cuniculus OX=9986 GN=GMPR PE=3 SV=1	0.873795	-0.194633	0.35474
G1SFS5	470.8	415.3	440.5	446.7	521.3	527.4	Myotubularin related protein 8 OS=Oryctolagus cuniculus OX=9986 GN=MTMR8 PE=3 SV=2	1.12724	0.172799	0.138855
G1SCN1	3941	3476.1	3425.9	4165	4131.8	3065.3	Polypeptide N-acetylgalactosaminyltransferase OS=Oryctolagus cuniculus OX=9986 GN=GALNT1 PE=3 SV=1	1.04787	0.0674653	0.685171
G1SES6	215.8	190.4	224.3	195.2	220.3	530	Transglutaminase 3 OS=Oryctolagus cuniculus OX=9986 GN=TGM3 PE=4 SV=2	1.4996	0.584581	0.386554
G1TD69	399.5	352.4	397.6	457.8	347.5	482.8	Formation of mitochondrial complex V assembly factor 1 homolog OS=Oryctolagus cuniculus OX=9986 GN=FMC1 PE=4 SV=1	1.12057	0.164238	0.356107
G1SUS6	231.4	204.2	219.3	176.9	233	212.6	Secretion associated Ras related GTPase 1B OS=Oryctolagus cuniculus OX=9986 GN=SAR1B PE=3 SV=1	0.950527	-0.0732005	0.584528
P67777	8783.6	7751.6	7771	7228.6	7809.3	4465.4	Serine/threonine-protein phosphatase 2A catalytic subunit alpha isoform OS=Oryctolagus cuniculus OX=9986 GN=PPP2CA PE=2 SV=1	0.8024	-0.317606	0.214582
G1U5Q4	3661.7	3231.6	3585.3	3372.2	3154.9	3460	Uncharacterized protein OS=Oryctolagus cuniculus OX=9986 GN=EXOC8 PE=4 SV=1	0.953095	-0.0693081	0.365195
G1TJ77	1020.7	900.8	1083	877.7	871	986.7	Ras association domain family member 2 OS=Oryctolagus cuniculus OX=9986 GN=RASSF2 PE=4 SV=1	0.910434	-0.135374	0.241537
G1T926	21758.7	19203.5	19938.4	19084.7	20155.3	16439.7	Uncharacterized protein OS=Oryctolagus cuniculus OX=9986 PE=4 SV=1	0.914272	-0.129305	0.263907
G1T4V2	5831.9	5147.7	6134.3	6162.4	6369.7	4976	Mitochondrial amidoxime reducing component 2 OS=Oryctolagus cuniculus OX=9986 GN=MARC2 PE=4 SV=1	1.02303	0.0328541	0.814049
G1TE47	1416.7	1250.6	1407.3	1401.7	1452.3	989.6	Conserved oligomeric Golgi complex subunit 8 OS=Oryctolagus cuniculus OX=9986 GN=COG8 PE=3 SV=1	0.943307	-0.0842007	0.647711
G1SRM4	2210.7	1951.5	2235.5	2004.6	2171	1330.2	Uncharacterized protein OS=Oryctolagus cuniculus OX=9986 PE=4 SV=1	0.860591	-0.2166	0.336789
P27115	2565.7	2265.1	2369.1	2809.5	2701.1	2922.8	Alpha-1,3-mannosyl-glycoprotein 2-beta-N-acetylglucosaminyltransferase OS=Oryctolagus cuniculus OX=9986 GN=MGAT1 PE=1 SV=1	1.17132	0.228138	0.019524
P12345	15868.6	14009.7	14978	16685.2	17221.5	12409.7	Aspartate aminotransferase, mitochondrial OS=Oryctolagus cuniculus OX=9986 GN=GOT2 PE=1 SV=2	1.03255	0.046213	0.778062
G1SNS6	143.9	127.1	129.8	146.4	162.4	271.3	CTD small phosphatase like 2 OS=Oryctolagus cuniculus OX=9986 GN=CTDSPL2 PE=4 SV=1	1.44735	0.533419	0.205585
G1SWG0	224.6	198.4	200.9	197.4	330.1	242	Biorientation of chromosomes in cell division 1 like 1 OS=Oryctolagus cuniculus OX=9986 GN=BOD1L1 PE=4 SV=1	1.23337	0.302607	0.290406
G1SZT8	5777	5101.2	5222.3	5450.2	5299.3	3052.3	SEC13 homolog, nuclear pore and COPII coat complex component OS=Oryctolagus cuniculus OX=9986 GN=SEC13 PE=3 SV=2	0.857228	-0.222249	0.393904
G1TM95	1788.8	1579.5	1557.4	1928.7	2048	2792.2	Uncharacterized protein OS=Oryctolagus cuniculus OX=9986 GN=LOC100358239 PE=4 SV=2	1.3742	0.458593	0.093272
G1T7T6	19353.8	17091.1	19612.5	16749.4	18218.2	14165	USO1 vesicle transport factor OS=Oryctolagus cuniculus OX=9986 GN=USO1 PE=4 SV=1	0.876469	-0.190225	0.181794
G1SH24	123.6	109.1	116.7	109.9	101.4	116.3	Uncharacterized protein OS=Oryctolagus cuniculus OX=9986 GN=TLR4 PE=3 SV=1	0.937607	-0.0929448	0.293421
G1TVS4	13144.5	11609	15485.1	13901.9	13889.5	9503.7	Hemopexin OS=Oryctolagus cuniculus OX=9986 GN=HPX PE=3 SV=1	0.926849	-0.109594	0.623488
G1SXE6	11318.4	9996.8	10310.5	10399.1	11632.6	8213.5	Dynein cytoplasmic 1 light intermediate chain 1 OS=Oryctolagus cuniculus OX=9986 GN=DYNC1LI1 PE=4 SV=1	0.956349	-0.0643909	0.69098
G1SPN1	221.4	195.6	203.4	186.3	181.3	180.3	NudC domain containing 2 OS=Oryctolagus cuniculus OX=9986 GN=NUDCD2 PE=4 SV=1	0.88314	-0.179286	0.037147
G1SWW6	1939.9	1713.9	1811	1803.9	1671.1	1358.5	Uncharacterized protein OS=Oryctolagus cuniculus OX=9986 GN=AP3S1 PE=4 SV=1	0.884479	-0.1771	0.226465
G1TCA0	1146	1012.5	1117.4	1159.2	1032.3	958.9	Zinc finger RNA binding protein OS=Oryctolagus cuniculus OX=9986 GN=ZFR PE=4 SV=1	0.96169	-0.0563562	0.588414
G1SFQ4	39731.4	35108.1	34503.3	38537.4	43087.9	55962.1	Integrin subunit alpha M OS=Oryctolagus cuniculus OX=9986 GN=ITGAM PE=3 SV=2	1.25831	0.33149	0.160499
G1T773	1958.8	1731	1775.5	1958.3	1906.5	1427.9	Uncharacterized protein OS=Oryctolagus cuniculus OX=9986 GN=COMMD7 PE=4 SV=2	0.968419	-0.0462967	0.768522
G1STG2	5111.9	4517.9	5086.5	5928.3	5354.7	4698.8	SRP receptor subunit beta OS=Oryctolagus cuniculus OX=9986 GN=SRPRB PE=1 SV=1	1.08599	0.119015	0.356079
G1U6H0	44244	39103	37190.3	47448.3	41377.5	50884.6	Calnexin OS=Oryctolagus cuniculus OX=9986 GN=CANX PE=3 SV=2	1.15906	0.21296	0.140784
G1SRA8	8589	7591.1	8000.4	8097.7	8469	6318.2	Eukaryotic translation initiation factor 2 subunit 3 OS=Oryctolagus cuniculus OX=9986 GN=EIF2S3 PE=1 SV=2	0.94642	-0.0794475	0.583056
G1U276	9707.5	8579.8	8785.6	10787.5	10935.7	9441.5	Succinate--CoA ligase [ADP-forming] subunit beta, mitochondrial OS=Oryctolagus cuniculus OX=9986 GN=SUCLA2 PE=3 SV=2	1.15114	0.203063	0.081285
G1T696	6523.6	5766.1	5913.8	6030.1	5393.6	5294.3	Nuclear cap binding protein subunit 1 OS=Oryctolagus cuniculus OX=9986 GN=NCBP1 PE=4 SV=1	0.918395	-0.122813	0.204442
U3KPM4	1016.6	899.1	1049.9	1196.1	1069	1039	Enoyl-CoA hydratase domain containing 3 OS=Oryctolagus cuniculus OX=9986 GN=ECHDC3 PE=4 SV=1	1.11414	0.155933	0.164551
G1SCK0	24262.6	21459	23993.7	26182.6	24732.4	22312.8	Pre-mRNA processing factor 8 OS=Oryctolagus cuniculus OX=9986 GN=PRPF8 PE=4 SV=1	1.05038	0.0709155	0.461603
G1T4Q8	3017.4	2669.3	3243.5	2652.5	2972.1	1771	Parvin alpha OS=Oryctolagus cuniculus OX=9986 GN=PARVA PE=4 SV=1	0.828156	-0.272026	0.266109
G1SLV3	12458	11022	11442.1	12561	12146	9483.3	Mtr4 exosome RNA helicase OS=Oryctolagus cuniculus OX=9986 GN=MTREX PE=4 SV=1	0.979045	-0.0305529	0.828369
G1TMW2	2934.9	2596.8	2851.4	2573.4	2453.6	1788.5	Toll interacting protein OS=Oryctolagus cuniculus OX=9986 GN=TOLLIP PE=4 SV=1	0.813005	-0.298664	0.119365
G1SCY4	9782.5	8655.8	9462.7	8246.4	9426	7658.6	Uncharacterized protein OS=Oryctolagus cuniculus OX=9986 GN=CAPZA1 PE=3 SV=1	0.907889	-0.139412	0.238204
G1T263	355.6	314.6	409	389.4	381.8	272.7	Component of oligomeric golgi complex 1 OS=Oryctolagus cuniculus OX=9986 GN=COG1 PE=4 SV=1	0.967291	-0.0479781	0.812946
U3KNJ9	1758.2	1555.8	1399.1	1641.3	1751	1119.3	GTPase, IMAP family member 2 OS=Oryctolagus cuniculus OX=9986 GN=GIMAP2 PE=4 SV=1	0.957247	-0.0630369	0.776206
G1T3Z2	3967.6	3511.7	3677.7	3392.2	3487.8	2857.4	NSFL1 cofactor OS=Oryctolagus cuniculus OX=9986 GN=NSFL1C PE=4 SV=2	0.872761	-0.196341	0.116691
G1SQS9	10465.6	9263.3	10710.7	11656.9	11199.3	10528.8	Uncharacterized protein OS=Oryctolagus cuniculus OX=9986 GN=DECR1 PE=4 SV=1	1.09676	0.13325	0.151267
G1U469	19400.1	17173	22202.9	19119.5	88950.7	21939.7	Myosin-11 OS=Oryctolagus cuniculus OX=9986 GN=MYH11 PE=3 SV=1	2.21196	1.14532	0.357755
G1SVS0	1145	1013.8	934.6	1311.7	1238.5	2083	Translocating chain-associated membrane protein OS=Oryctolagus cuniculus OX=9986 GN=TRAM1 PE=3 SV=1	1.49777	0.582815	0.137527
G1STI8	138	122.2	141.4	129.2	177.8	152.9	Myosin VC OS=Oryctolagus cuniculus OX=9986 GN=MYO5C PE=3 SV=2	1.14517	0.195561	0.270935
G1U8J5	1602	1419.1	1807.4	2094.2	1995.5	1601	ATP synthase-coupling factor 6, mitochondrial OS=Oryctolagus cuniculus OX=9986 GN=ATP5PF PE=3 SV=1	1.17857	0.237031	0.200732
G1T9D7	2910.3	2578.5	2570.3	2881	3431.5	5663.7	GRAM domain containing 1C OS=Oryctolagus cuniculus OX=9986 GN=GRAMD1C PE=4 SV=2	1.48605	0.57148	0.202768
G1SMA6	1708.2	1513.9	1638.2	1799.1	1807.4	1523.7	Alpha-mannosidase OS=Oryctolagus cuniculus OX=9986 GN=LOC100348947 PE=3 SV=1	1.05553	0.0779703	0.456164
G1TEE3	2538.8	2250.1	2385.1	2559.7	2543	2106.1	Protein phosphatase 4 regulatory subunit 3A OS=Oryctolagus cuniculus OX=9986 GN=PPP4R3A PE=4 SV=2	1.00485	0.00698159	0.948967
B7NZN9	3826.7	3391.7	3666.6	4418.9	4081.8	5512.2	Signal sequence receptor, delta (Predicted) OS=Oryctolagus cuniculus OX=9986 GN=SSR4 PE=4 SV=1	1.28736	0.364414	0.081419
B7NZI5	1844	1634.6	1728.7	1591.3	1754.6	1297.4	Eukaryotic translation initiation factor 6 OS=Oryctolagus cuniculus OX=9986 GN=EIF6 PE=3 SV=1	0.891691	-0.165384	0.269619
P14519	11168.7	9900.4	10900.4	12327	11408.9	14366.3	Serine hydroxymethyltransferase, mitochondrial OS=Oryctolagus cuniculus OX=9986 GN=SHMT2 PE=1 SV=2	1.19183	0.253178	0.099113
G1SFC6	1983.4	1758.3	1923.5	1707.3	1704.7	1943.4	RNA cytidine acetyltransferase OS=Oryctolagus cuniculus OX=9986 GN=NAT10 PE=3 SV=1	0.945315	-0.0811329	0.376485
G1SEW3	9917.5	8792	11179.4	9038.8	9453.1	7501.9	RAN binding protein 2 OS=Oryctolagus cuniculus OX=9986 GN=RANBP2 PE=4 SV=2	0.869681	-0.201442	0.226727
G1TF80	557.5	494.3	589.2	644.3	605.1	573.2	Uncharacterized protein OS=Oryctolagus cuniculus OX=9986 GN=THOC7 PE=4 SV=1	1.11066	0.151422	0.155586
G1SP36	433.2	384.1	401.2	336	388.7	431.3	Exportin 5 OS=Oryctolagus cuniculus OX=9986 GN=XPO5 PE=4 SV=1	0.948707	-0.0759655	0.539526
G1T1L7	6046.8	5362	5799.5	6533.9	6683.9	6779.4	THO complex 1 OS=Oryctolagus cuniculus OX=9986 GN=THOC1 PE=4 SV=1	1.16207	0.216693	0.011939
G1SK97	327.7	290.6	333.2	308.8	323	234.5	ArfGAP with SH3 domain, ankyrin repeat and PH domain 2 OS=Oryctolagus cuniculus OX=9986 GN=ASAP2 PE=4 SV=2	0.910457	-0.135337	0.404887
G1U804	818.9	726.3	616.6	656.9	965.3	1305.8	Uncharacterized protein OS=Oryctolagus cuniculus OX=9986 PE=4 SV=1	1.35443	0.437683	0.263134
G1TZI2	2930.4	2599.3	2768	3207.6	3014.5	2639	PGAM family member 5, mitochondrial serine/threonine protein phosphatase OS=Oryctolagus cuniculus OX=9986 GN=PGAM5 PE=4 SV=2	1.0679	0.0947739	0.384203
G1TDK8	10531.4	9341.8	9828.8	11130.1	10525.9	7993.7	SWI/SNF related, matrix associated, actin dependent regulator of chromatin subfamily c member 2 OS=Oryctolagus cuniculus OX=9986 GN=SMARCC2 PE=4 SV=1	0.998239	-0.00254283	0.987193
G1T2K6	1468.2	1302.4	1457.2	1680.3	1673.6	1667.3	ATPase family, AAA domain containing 1 OS=Oryctolagus cuniculus OX=9986 GN=ATAD1 PE=3 SV=1	1.18766	0.248126	0.00788
G1SPX7	374.9	332.6	345.8	361.5	338.8	404	COMM domain containing 10 OS=Oryctolagus cuniculus OX=9986 GN=COMMD10 PE=4 SV=2	1.04842	0.0682154	0.497887
G1SNV3	1877	1665.1	1628.4	1797.4	1837.9	1536.9	Uncharacterized protein OS=Oryctolagus cuniculus OX=9986 PE=4 SV=1	1.00033	0.000474569	0.996518
U3KPJ6	9480.6	8412.1	9480.1	10141.9	10177.1	10815.5	Alkylglycerone-phosphate synthase OS=Oryctolagus cuniculus OX=9986 GN=AGPS PE=3 SV=1	1.13742	0.185771	0.039948
G1SIN7	1065.8	945.7	1029.8	873.2	978.1	765.3	Rab geranylgeranyltransferase subunit alpha OS=Oryctolagus cuniculus OX=9986 GN=RABGGTA PE=4 SV=2	0.860356	-0.216994	0.116907
G1TRG3	504	447.3	430	432.7	455.6	416.5	ORAI calcium release-activated calcium modulator 3 OS=Oryctolagus cuniculus OX=9986 GN=ORAI3 PE=4 SV=1	0.944617	-0.0821986	0.366463
G1T7L3	10555.3	9366.7	9752.4	10538.9	12175.8	9825.9	Poly [ADP-ribose] polymerase OS=Oryctolagus cuniculus OX=9986 GN=PARP4 PE=4 SV=2	1.09659	0.133022	0.287155
G1U5I9	119.5	106.1	137.6	112.2	135.7	165	ELM2 and Myb/SANT domain containing 1 OS=Oryctolagus cuniculus OX=9986 GN=ELMSAN1 PE=4 SV=1	1.13684	0.185028	0.404496
G1SJ23	14364.6	12748	14796.8	12711.5	13580.2	7581.4	Calpain-1 catalytic subunit OS=Oryctolagus cuniculus OX=9986 GN=CAPN1 PE=3 SV=1	0.808246	-0.307134	0.246061
G1SWV9	1097.5	974	990.6	1215	1200.9	1720.4	NSF attachment protein beta OS=Oryctolagus cuniculus OX=9986 GN=NAPB PE=4 SV=2	1.35081	0.433819	0.11046
G1STX4	10003.9	8878.4	10084.5	8755.3	8635.7	5174.7	Signal recognition particle 54 kDa protein OS=Oryctolagus cuniculus OX=9986 GN=SRP54 PE=3 SV=1	0.779019	-0.36027	0.159623
G1U3F9	1845.4	1638	1614.8	1395.6	1361.2	1354.9	SH3 domain binding protein 4 OS=Oryctolagus cuniculus OX=9986 GN=SH3BP4 PE=4 SV=1	0.8065	-0.310254	0.011507
G1SSQ3	1372.8	1218.6	1267.3	1428.2	1362.1	1581.3	Mitochondrial poly(A) polymerase OS=Oryctolagus cuniculus OX=9986 GN=MTPAP PE=4 SV=2	1.13292	0.180046	0.097272
G1TI10	7303.8	6483.3	6512.2	8103.7	7468.3	5209.8	STT3B, catalytic subunit of the oligosaccharyltransferase complex OS=Oryctolagus cuniculus OX=9986 GN=STT3B PE=4 SV=1	1.02377	0.0338902	0.86948
G1TGA8	8973.5	7965.8	8675.9	9377.8	8045.1	8230.4	SEC22 homolog B, vesicle trafficking protein (gene/pseudogene) OS=Oryctolagus cuniculus OX=9986 GN=SEC22B PE=3 SV=1	1.00149	0.00214369	0.981432
G1TAL6	8339.4	7403.8	8025.3	9489	9171.5	8515.1	Polypeptide N-acetylgalactosaminyltransferase OS=Oryctolagus cuniculus OX=9986 GN=GALNT2 PE=3 SV=1	1.14335	0.193261	0.045977
P50117	4949.4	4394.1	4236.5	3834.1	7278	9624.7	Protein S100-A9 OS=Oryctolagus cuniculus OX=9986 GN=S100A9 PE=2 SV=3	1.52701	0.61071	0.232147
G1SXB1	846.1	751.2	841.3	956.7	891.5	792.5	RNA polymerase II subunit G OS=Oryctolagus cuniculus OX=9986 GN=POLR2G PE=4 SV=1	1.08288	0.114867	0.301564
G1SUM3	982.6	872.5	923.5	849.3	940.2	706.1	Ubiquitin like modifier activating enzyme 3 OS=Oryctolagus cuniculus OX=9986 GN=UBA3 PE=4 SV=1	0.89815	-0.154972	0.277979
G1T194	1461.4	1297.8	1500.1	1558.6	1564.7	1604.4	A-kinase anchoring protein 8 like OS=Oryctolagus cuniculus OX=9986 GN=AKAP8L PE=3 SV=2	1.10997	0.150522	0.070187
G1T1G7	2609.5	2317.3	2641.5	2744.9	2322.4	1792.8	RNA binding motif protein 22 OS=Oryctolagus cuniculus OX=9986 GN=RBM22 PE=4 SV=1	0.906425	-0.14174	0.467155
G1SLM2	682.5	606.1	575.8	573.7	635.3	398.7	Uncharacterized protein OS=Oryctolagus cuniculus OX=9986 PE=3 SV=2	0.862315	-0.213713	0.332343
G1TH13	4869.6	4324.7	5349.7	5792	5180.7	5759.4	Uncharacterized protein OS=Oryctolagus cuniculus OX=9986 GN=RAD50 PE=4 SV=1	1.15045	0.202195	0.110202
G1SDQ5	1761	1564.2	1726.5	1616.8	1487.5	1155	VPS50, EARP/GARPII complex subunit OS=Oryctolagus cuniculus OX=9986 GN=VPS50 PE=4 SV=1	0.843142	-0.246152	0.153755
G1SSQ7	506.2	449.7	466	511.2	477.3	397.1	Rhomboid domain containing 1 OS=Oryctolagus cuniculus OX=9986 GN=RHBDD1 PE=4 SV=2	0.974471	-0.0373088	0.764714
G1TA78	26429	23479.6	19370.9	18444	31696.3	23711	Tryptophan--tRNA ligase, cytoplasmic OS=Oryctolagus cuniculus OX=9986 GN=WARS PE=3 SV=1	1.06599	0.0921953	0.744446
G1SCM2	747.8	664.5	764.3	753.4	642.3	523.5	Uncharacterized protein OS=Oryctolagus cuniculus OX=9986 GN=MFF PE=4 SV=1	0.881742	-0.181572	0.306265
Q09YN4	6320.2	5617.5	6164.7	5424.9	6293.6	4700.4	F-actin-capping protein subunit alpha-2 OS=Oryctolagus cuniculus OX=9986 GN=CAPZA2 PE=3 SV=3	0.907001	-0.140824	0.330828
G1U7M0	3221.3	2863.2	3119.4	3441.7	3261.2	2408.1	Vesicle transport through interaction with t-SNAREs 1A OS=Oryctolagus cuniculus OX=9986 GN=VTI1A PE=4 SV=2	0.989906	-0.0146366	0.931014
G1SET5	2771.7	2463.9	2518	2860.6	2812.3	2860.4	Cell migration inducing hyaluronidase 2 OS=Oryctolagus cuniculus OX=9986 GN=CEMIP2 PE=4 SV=2	1.10056	0.138238	0.054046
G1T501	3553.6	3159.1	3445.1	3376.1	3342.7	3519.8	Cell cycle and apoptosis regulator 2 OS=Oryctolagus cuniculus OX=9986 GN=CCAR2 PE=4 SV=2	1.00795	0.0114298	0.845522
G1TB64	1614.8	1435.5	1566.9	1847.9	1712.9	1768.9	Malonyl-CoA decarboxylase OS=Oryctolagus cuniculus OX=9986 GN=MLYCD PE=4 SV=1	1.15431	0.207036	0.02321
G1SYU3	2328.7	2070.3	2164.3	1670.2	2094.7	1602.6	Rho GTPase activating protein 25 OS=Oryctolagus cuniculus OX=9986 GN=ARHGAP25 PE=4 SV=1	0.817805	-0.290171	0.080792
G1SQV1	349.2	310.5	336.4	330.7	320.6	399	RB transcriptional corepressor like 2 OS=Oryctolagus cuniculus OX=9986 GN=RBL2 PE=4 SV=1	1.05441	0.0764387	0.541853
G1T9U1	298.1	265	270.2	272.2	281.5	450	Nucleolar protein 11 OS=Oryctolagus cuniculus OX=9986 GN=NOL11 PE=4 SV=1	1.20449	0.26842	0.38792
G1TEI1	5021.1	4464.9	4646.6	5429.9	5506.3	4173.5	Mannose-6-phosphate receptor, cation dependent OS=Oryctolagus cuniculus OX=9986 GN=M6PR PE=4 SV=1	1.06914	0.0964481	0.519779
G1T6C1	1859.1	1653.3	2093.7	1709.2	2042	1520.9	Deoxyribose-phosphate aldolase OS=Oryctolagus cuniculus OX=9986 GN=DERA PE=4 SV=2	0.940422	-0.0886198	0.60478
G1SXC8	251.5	223.7	267.6	278.6	223.9	379.9	Nuclear RNA export factor 1 OS=Oryctolagus cuniculus OX=9986 GN=NXF1 PE=4 SV=1	1.18794	0.24846	0.382392
G1TH33	5672.9	5045.5	6190.7	6386.5	6251.4	5829	Electron transfer flavoprotein subunit beta OS=Oryctolagus cuniculus OX=9986 GN=ETFB PE=4 SV=1	1.09213	0.127142	0.234448
G1SEU9	1385.2	1232	1313.4	1594.6	1395.2	952.7	Late endosomal/lysosomal adaptor, MAPK and MTOR activator 3 OS=Oryctolagus cuniculus OX=9986 GN=LAMTOR3 PE=4 SV=1	1.00303	0.00436188	0.984727
G1T303	519.9	462.4	552.9	485.4	533.5	470.9	DNA topoisomerase OS=Oryctolagus cuniculus OX=9986 GN=TOP3B PE=3 SV=1	0.970427	-0.0433084	0.665821
G1T5R8	1173	1043.4	979.3	1339.5	1322.2	1037.6	Uncharacterized protein OS=Oryctolagus cuniculus OX=9986 PE=4 SV=1	1.15759	0.211121	0.212409
G1SJS7	1442	1282.7	1529.2	1591.6	1475.5	1344.7	Uncharacterized protein OS=Oryctolagus cuniculus OX=9986 PE=4 SV=2	1.03712	0.0525814	0.631302
G1SXU5	1166.6	1037.8	1071.7	1226.2	1126	1136.2	Thioredoxin like 4A OS=Oryctolagus cuniculus OX=9986 GN=TXNL4A PE=4 SV=1	1.0648	0.0905865	0.229847
G1TTQ1	6132	5455.1	6043.6	6327.7	5918.8	4122.2	DNA-directed RNA polymerase subunit OS=Oryctolagus cuniculus OX=9986 PE=3 SV=1	0.92842	-0.10715	0.58535
G1SDW3	1911.4	1700.7	1683.6	1986	1963.6	2473	Phosphatidate cytidylyltransferase OS=Oryctolagus cuniculus OX=9986 GN=CDS2 PE=3 SV=1	1.2128	0.278336	0.107443
O77503	5944.8	5290	6678.9	7244.5	5974.4	4010.6	Protein argonaute-2 (Fragment) OS=Oryctolagus cuniculus OX=9986 GN=AGO2 PE=1 SV=2	0.961806	-0.0561822	0.834449
G1TFD0	1990.2	1771	1797.4	1992.7	2004.6	1139.7	Uncharacterized protein OS=Oryctolagus cuniculus OX=9986 PE=4 SV=2	0.924154	-0.113795	0.658185
G1TDQ3	3907.9	3477.6	3999.8	3790.8	3874.4	3089.9	BUB3, mitotic checkpoint protein OS=Oryctolagus cuniculus OX=9986 GN=BUB3 PE=4 SV=2	0.944648	-0.0821513	0.517443
G1TE14	15145.2	13478.2	12703.7	16217	14788.6	12668.8	XK-related protein OS=Oryctolagus cuniculus OX=9986 GN=XK PE=3 SV=2	1.0568	0.0796996	0.567512
G1TC74	2046.4	1821.3	1947.9	1989.1	1775.8	1454	CD99 molecule like 2 OS=Oryctolagus cuniculus OX=9986 GN=CD99L2 PE=4 SV=2	0.897397	-0.156182	0.303532
G1TB56	1412.6	1257.3	1486.9	1422	1307.3	1221.8	Calcium binding and coiled-coil domain 2 OS=Oryctolagus cuniculus OX=9986 GN=CALCOCO2 PE=4 SV=1	0.950515	-0.0732187	0.484497
G1SDZ5	2546.4	2266.5	2669.7	2621	2920.1	1579.9	HIV-1 Tat interactive protein 2 OS=Oryctolagus cuniculus OX=9986 GN=HTATIP2 PE=4 SV=2	0.951675	-0.0714591	0.789982
G1TDT6	2534	2255.7	2384.9	2331.8	2144.7	1229.2	Isochorismatase domain containing 1 OS=Oryctolagus cuniculus OX=9986 GN=ISOC1 PE=4 SV=2	0.795264	-0.330494	0.234413
G1T8X3	1235.5	1099.9	1210.5	1194.4	1287.1	958.5	Neuraminidase 1 OS=Oryctolagus cuniculus OX=9986 GN=NEU1 PE=4 SV=1	0.970135	-0.0437426	0.756542
G1SXD0	90.4	80.5	105.1	79.7	84.1	99.2	Phospholipase A1 member A OS=Oryctolagus cuniculus OX=9986 GN=PLA1A PE=3 SV=1	0.952899	-0.0696048	0.664511
G1SWC9	5612.4	4997.3	4981.5	4602.1	5393.8	3607.3	IST1, ESCRT-III associated factor OS=Oryctolagus cuniculus OX=9986 GN=IST1 PE=4 SV=2	0.872492	-0.196786	0.299956
G1TXS5	4069.2	3623.4	3748.9	4296.5	4135.7	3404	Uncharacterized protein OS=Oryctolagus cuniculus OX=9986 GN=SEC63 PE=4 SV=1	1.0345	0.0489295	0.688471
G1SHI2	961.5	856.2	968.4	807.6	944.8	730	Myeloid differentiation primary response protein MyD88 OS=Oryctolagus cuniculus OX=9986 GN=MYD88 PE=4 SV=1	0.890995	-0.166511	0.235319
G1TJW3	12142.6	10814.7	12668	13195.4	11856.7	14982.8	Non-POU domain containing octamer binding OS=Oryctolagus cuniculus OX=9986 GN=NONO PE=4 SV=1	1.12378	0.168356	0.237904
G1SZW5	2182.4	1943.9	1941.9	2066.7	2260	1836.1	BICD cargo adaptor 2 OS=Oryctolagus cuniculus OX=9986 GN=BICD2 PE=4 SV=1	1.01559	0.0223167	0.839829
G1SZ93	7500.8	6681.7	7666.8	7980.1	7969	6490.4	Isoleucyl-tRNA synthetase 2, mitochondrial OS=Oryctolagus cuniculus OX=9986 GN=IARS2 PE=3 SV=2	1.02701	0.038453	0.751899
G1SN87	2360	2102.4	2053.3	1771.5	1890.2	1161.9	Phosphoinositide-3-kinase regulatory subunit 1 OS=Oryctolagus cuniculus OX=9986 GN=PIK3R1 PE=4 SV=2	0.740304	-0.43381	0.082596
G1SR63	3607	3213.8	3510.9	4110.7	3825.2	3653.9	Prolactin regulatory element binding OS=Oryctolagus cuniculus OX=9986 GN=PREB PE=4 SV=1	1.12177	0.165778	0.078235
G1SDK8	306.9	273.5	274.2	234.3	278.2	189.8	NEDD8-activating enzyme E1 regulatory subunit OS=Oryctolagus cuniculus OX=9986 GN=NAE1 PE=3 SV=2	0.821788	-0.283162	0.141821
G1SCR7	5716.4	5094.5	5951.5	6317.4	5498.1	5374.1	Nucleoporin 155 OS=Oryctolagus cuniculus OX=9986 GN=NUP155 PE=4 SV=2	1.02549	0.0363078	0.734197
G1U1H4	3001.4	2675.3	2652.1	2874	2888.3	1895	Ras related GTP binding B OS=Oryctolagus cuniculus OX=9986 GN=RRAGB PE=4 SV=2	0.919376	-0.121273	0.55462
G1U741	1985.7	1770.1	1592.3	1856.8	1633.8	1530	Tetraspanin OS=Oryctolagus cuniculus OX=9986 GN=CD37 PE=3 SV=2	0.938763	-0.0911671	0.504657
G1T673	1429.2	1274	1454.4	1383.6	1408	787.2	Calcineurin like EF-hand protein 1 OS=Oryctolagus cuniculus OX=9986 GN=CHP1 PE=4 SV=1	0.860785	-0.216275	0.411603
G1TCB7	1162.4	1036.3	1053.1	988.2	1127.9	909	Ubiquitin carboxyl-terminal hydrolase OS=Oryctolagus cuniculus OX=9986 GN=UCHL5 PE=3 SV=2	0.930285	-0.104255	0.371908
G1T3R5	10025.1	8937.6	9280	9422.4	9183.8	6267.1	Endoplasmic reticulum oxidoreductase 1 alpha OS=Oryctolagus cuniculus OX=9986 GN=ERO1A PE=4 SV=2	0.880698	-0.183281	0.35067
G1SL61	2058.8	1835.6	2074.4	2263.3	1942.6	1753.3	Sp1 transcription factor OS=Oryctolagus cuniculus OX=9986 GN=SP1 PE=4 SV=2	0.998392	-0.00232172	0.985685
G1T550	8379	7471.8	8433.5	9140.1	8781.2	11287.6	Uncharacterized protein OS=Oryctolagus cuniculus OX=9986 GN=RAB5C PE=4 SV=1	1.20279	0.266384	0.123149
G1SYY1	292.2	260.5	262.5	290	300.2	336.9	Non-lysosomal glucosylceramidase OS=Oryctolagus cuniculus OX=9986 GN=GBA2 PE=3 SV=1	1.13727	0.185571	0.100678
G1SE16	610.3	544.2	615.3	678.5	698.7	761.4	LEM domain containing 3 OS=Oryctolagus cuniculus OX=9986 GN=LEMD3 PE=4 SV=1	1.20839	0.27308	0.022189
G1SL53	4169.9	3718.8	3790.8	3296.8	3512.6	3570.2	TBC1 domain family member 9B OS=Oryctolagus cuniculus OX=9986 GN=TBC1D9B PE=4 SV=2	0.888702	-0.170228	0.056293
G1SJL6	6785.3	6052.7	6457.9	8620.2	6210.4	7996.4	Scavenger receptor class B member 2 OS=Oryctolagus cuniculus OX=9986 GN=SCARB2 PE=3 SV=1	1.183	0.242446	0.192852
G1SWH9	3287.1	2932.4	3081.3	3772	3671.1	4192.3	Translocon-associated protein subunit alpha OS=Oryctolagus cuniculus OX=9986 GN=SSR1 PE=4 SV=1	1.25101	0.323094	0.014867
[truncated: 2,708 more rows]
